# Supplementary material for: Untargeted Fecal Metabolomic Analyses across an Industrialization Gradient Reveal Shared Metabolites and Impact of Industrialization on Fecal Microbiome-Metabolome Interactions
Source: PubMed Central journal article supplement (PMC9765122; doi:10.1128/msystems.00710-22), 2022-11-23

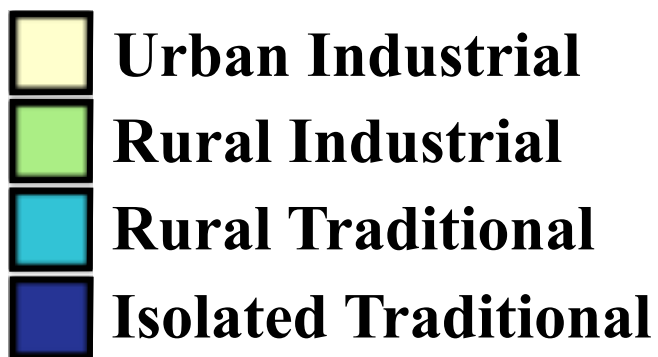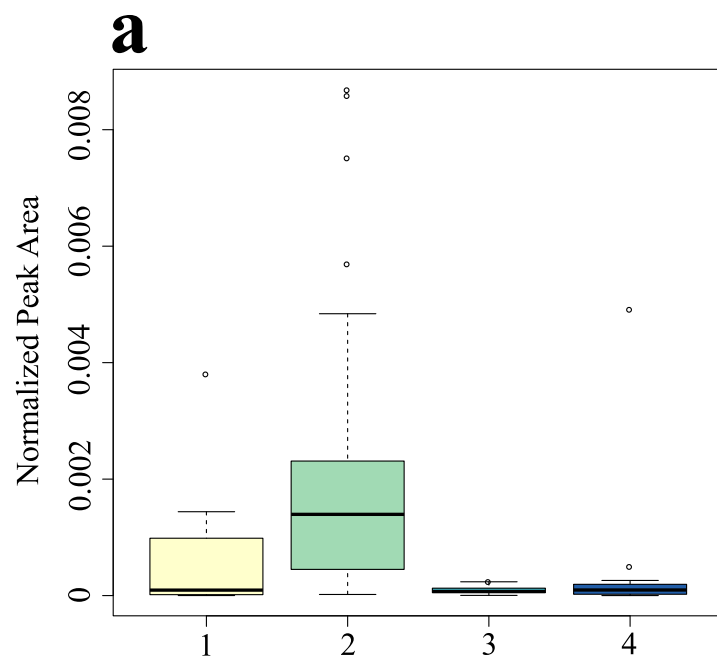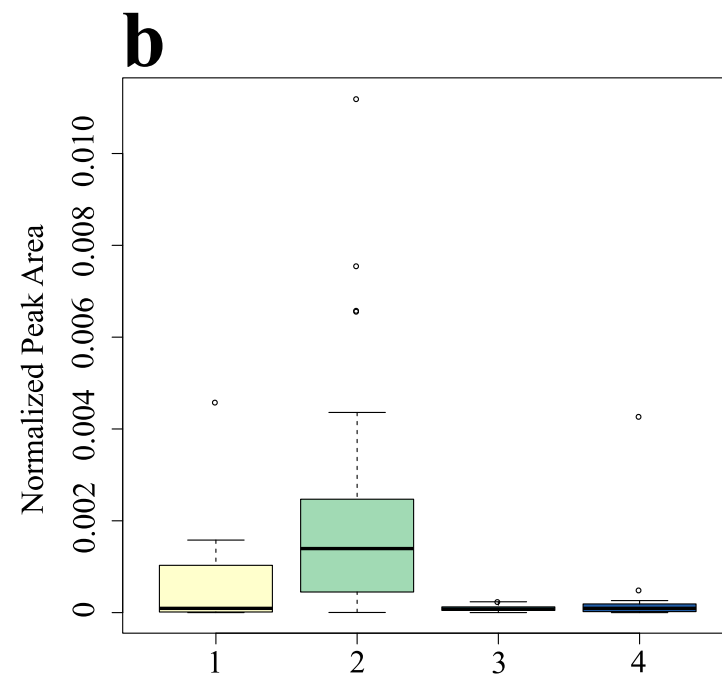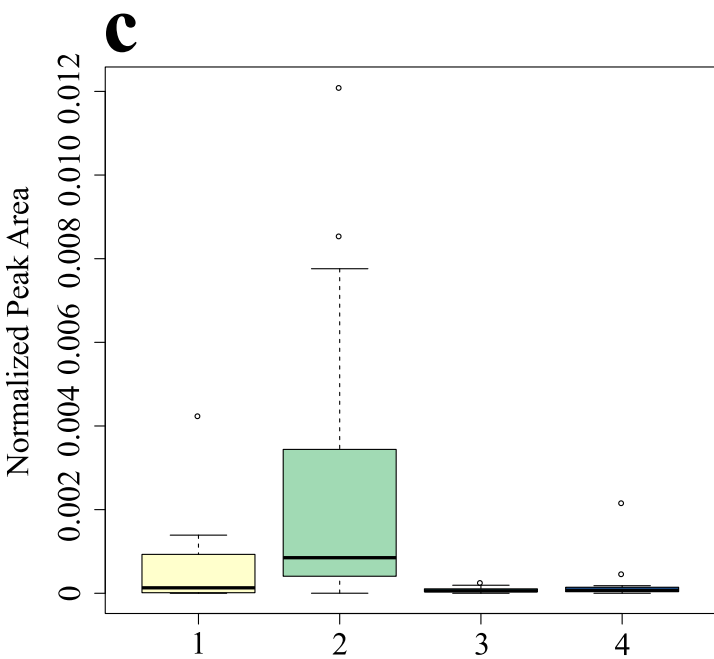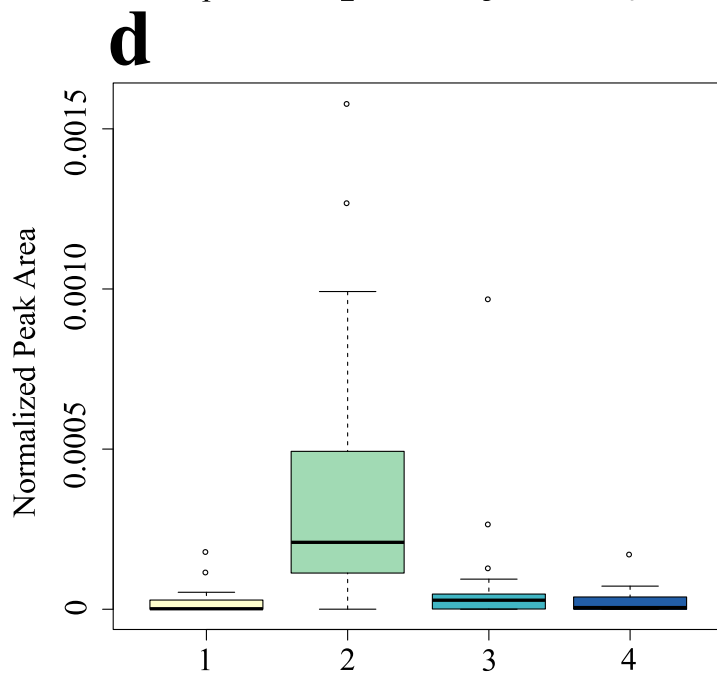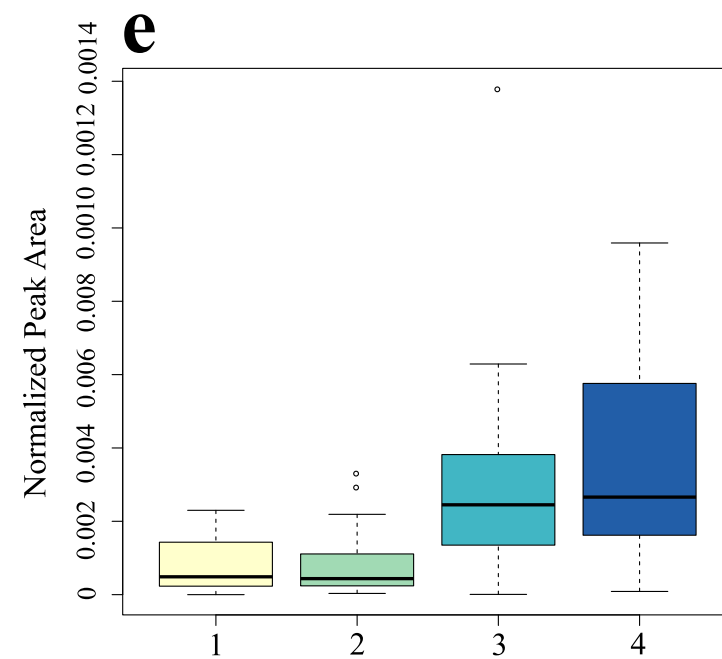

**f**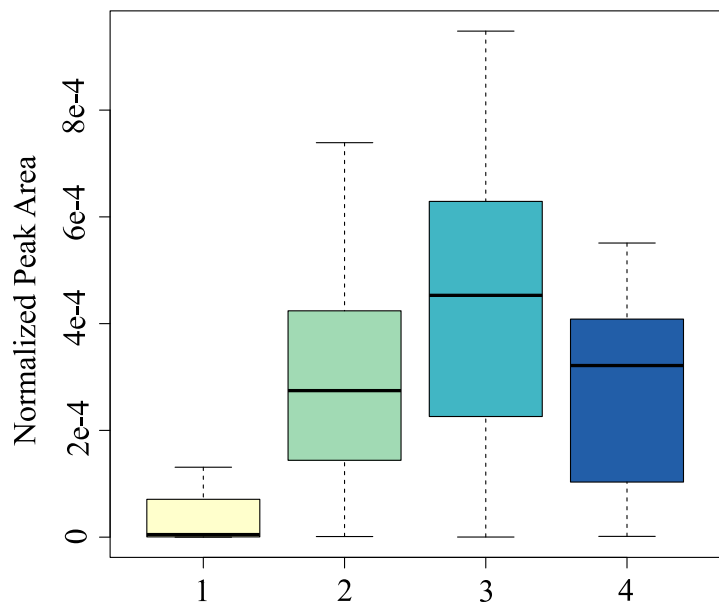**g**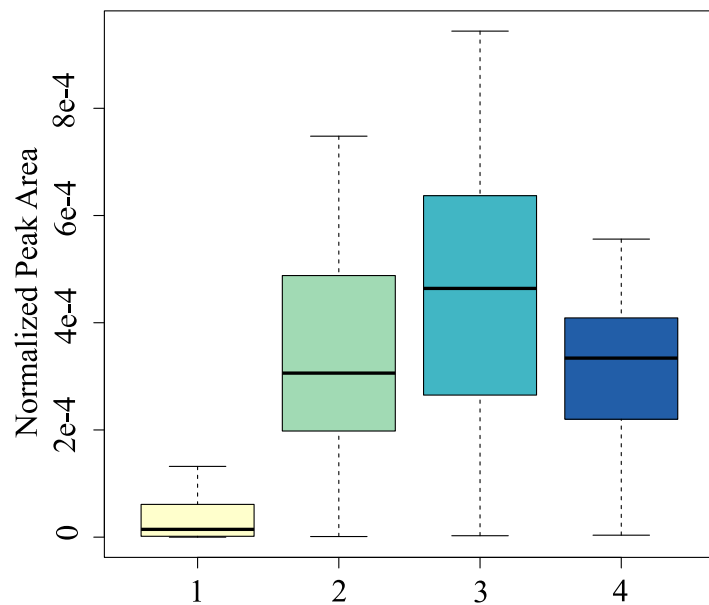**h**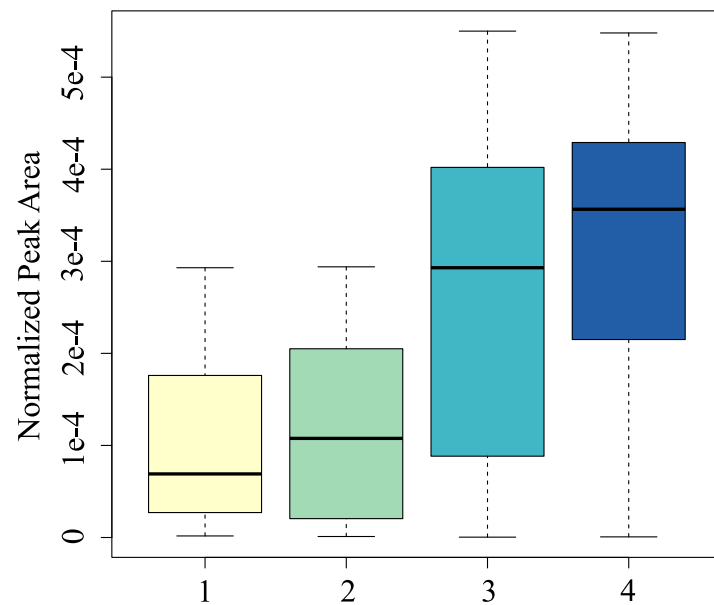**i**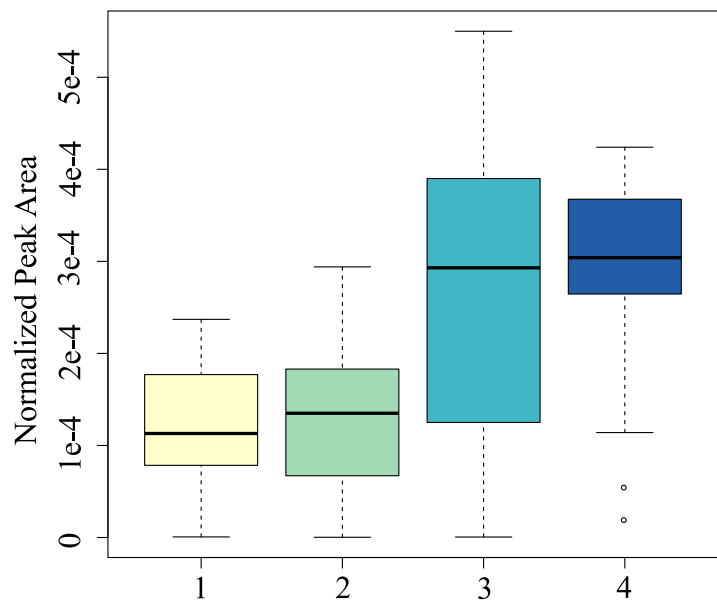**j**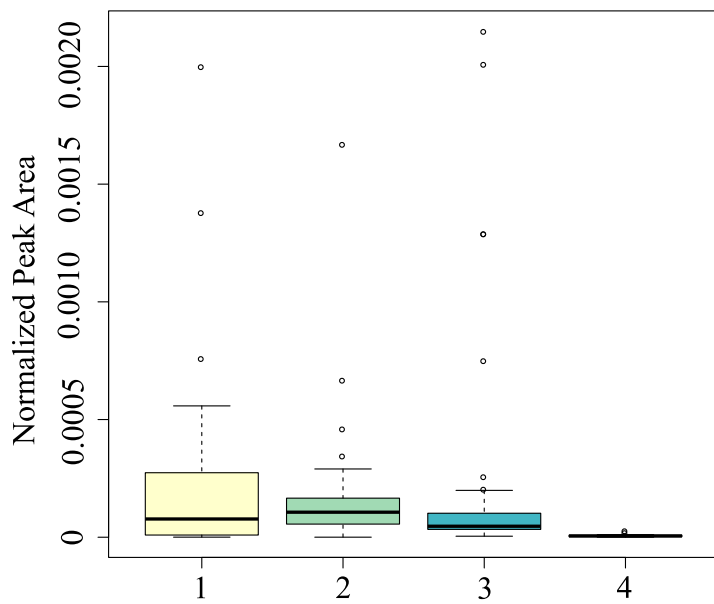**k**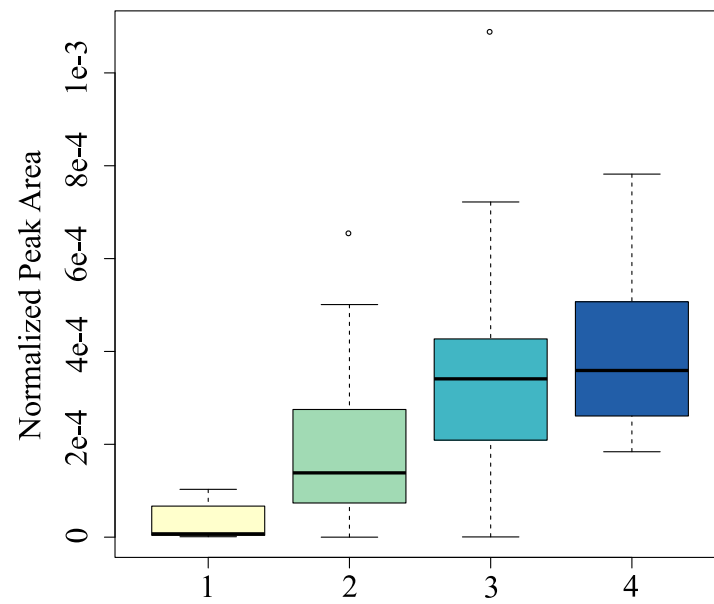

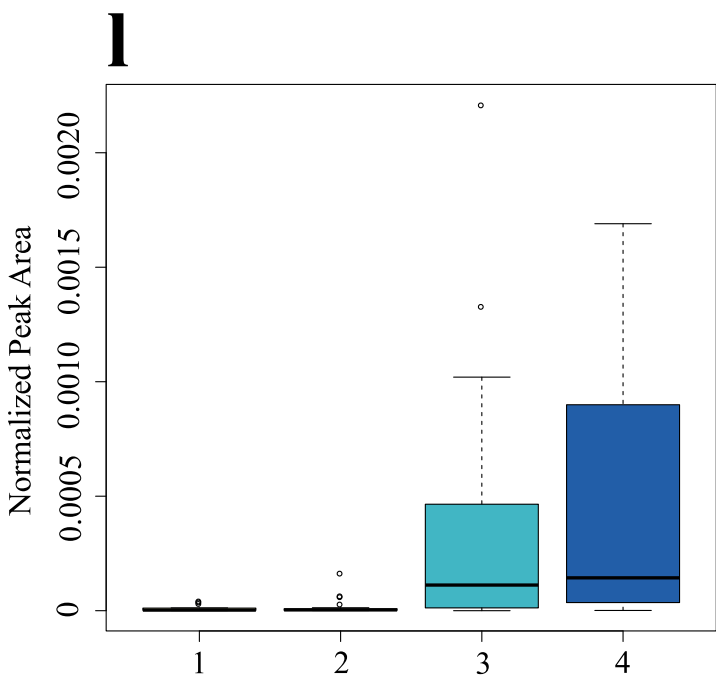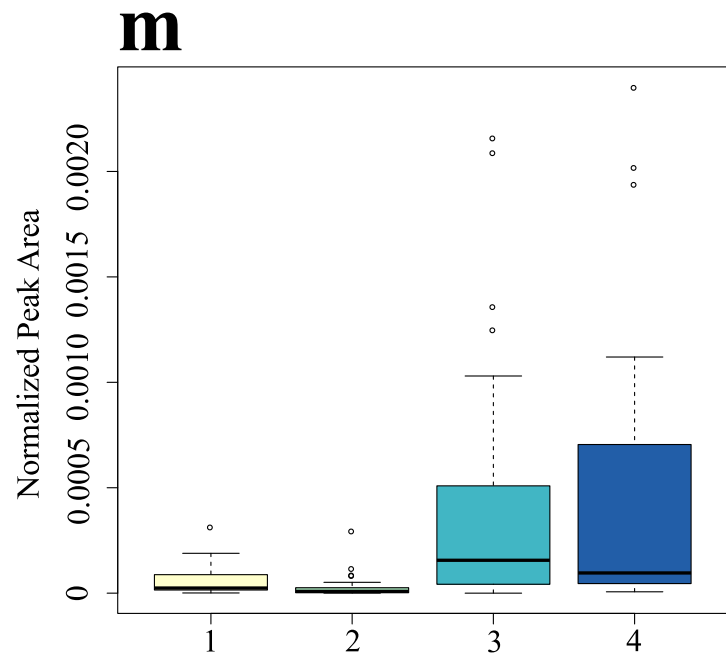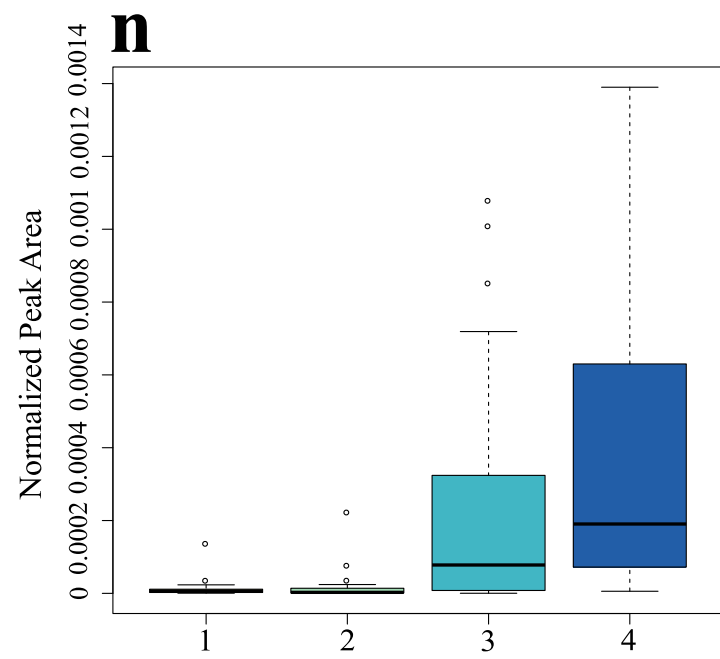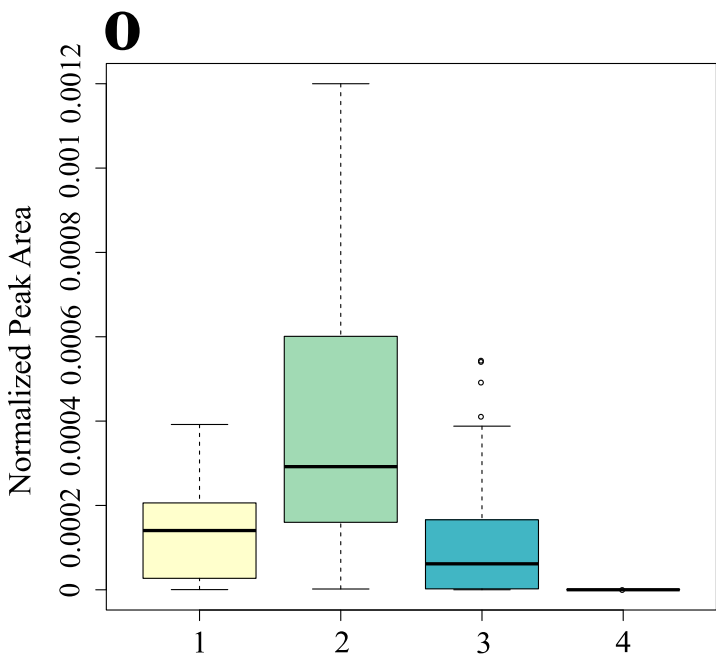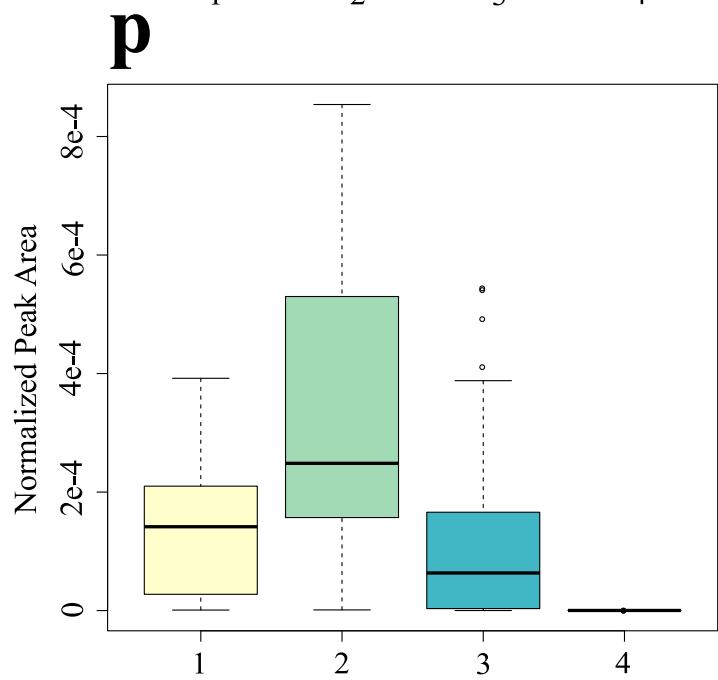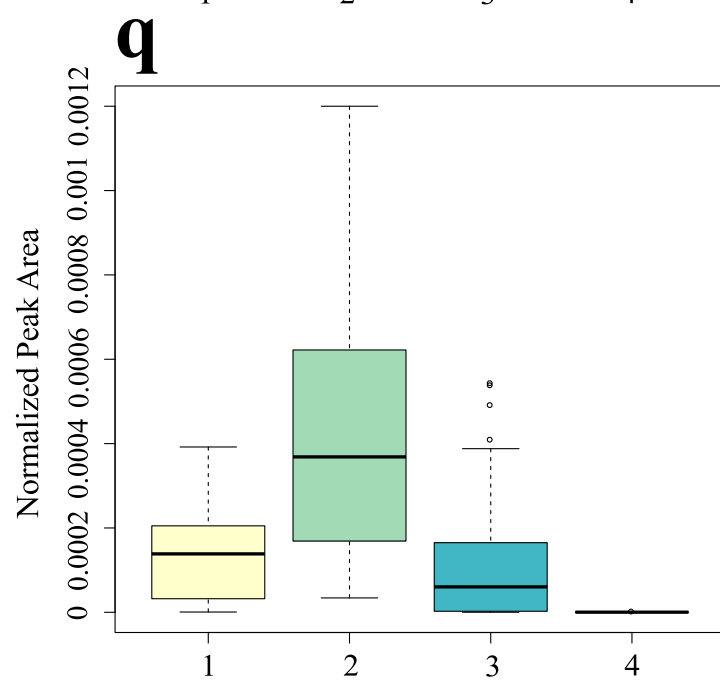

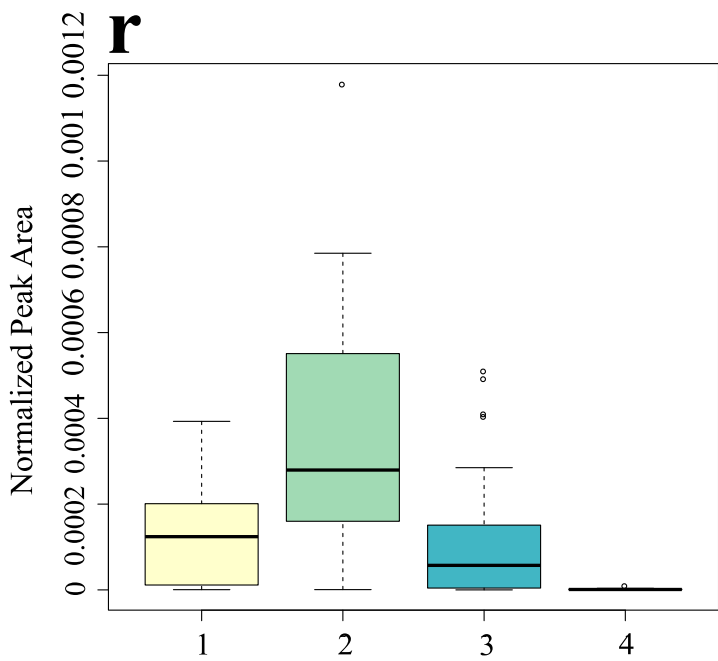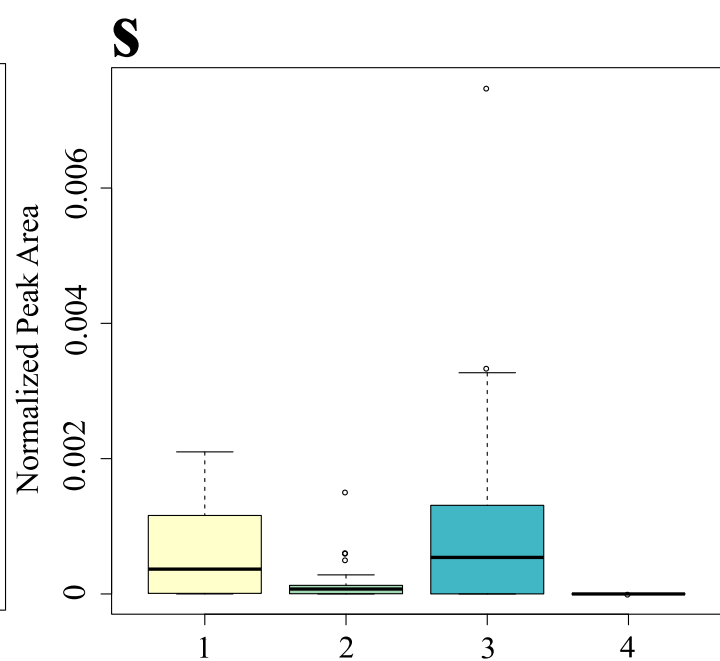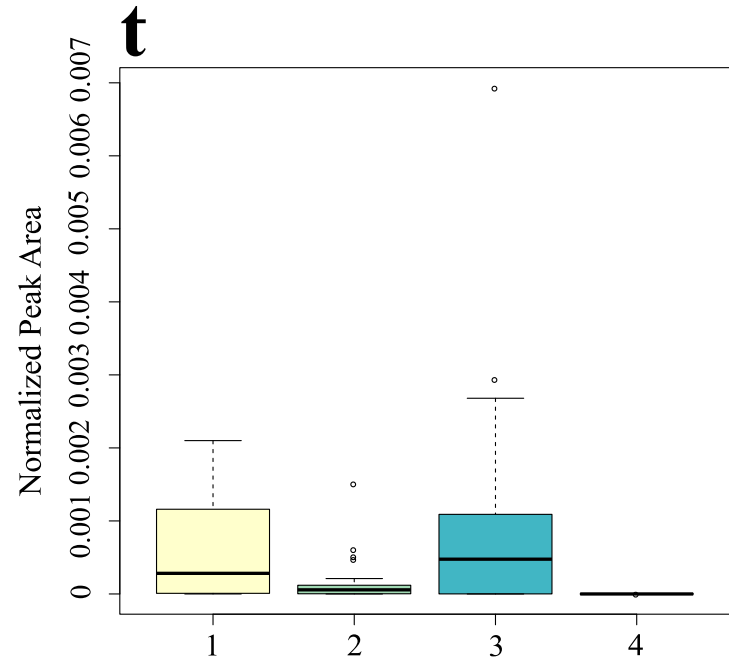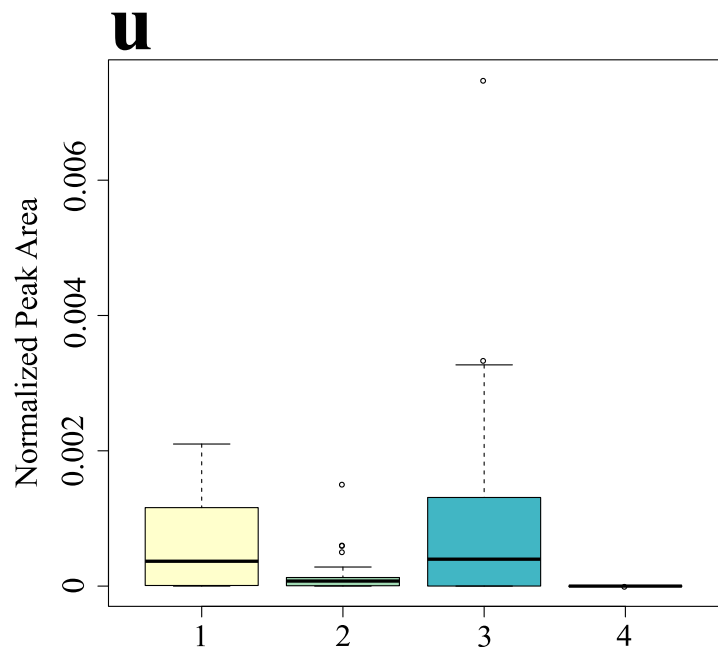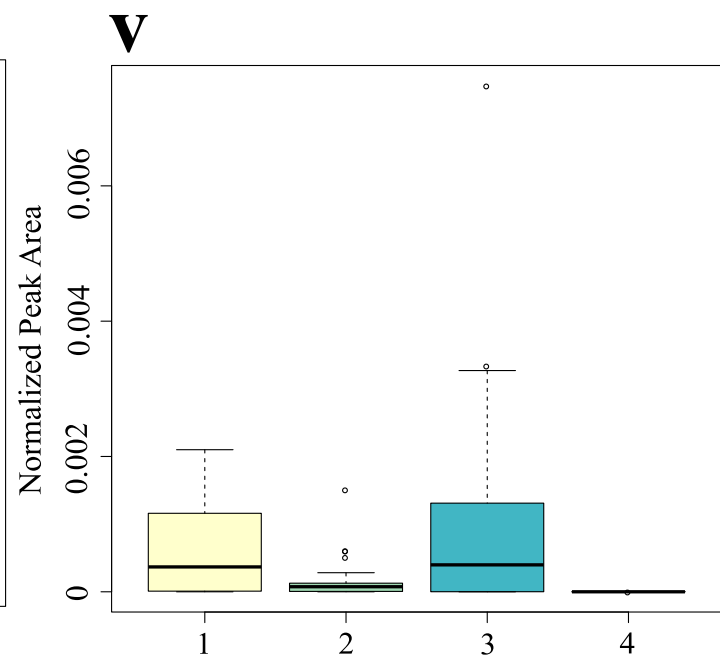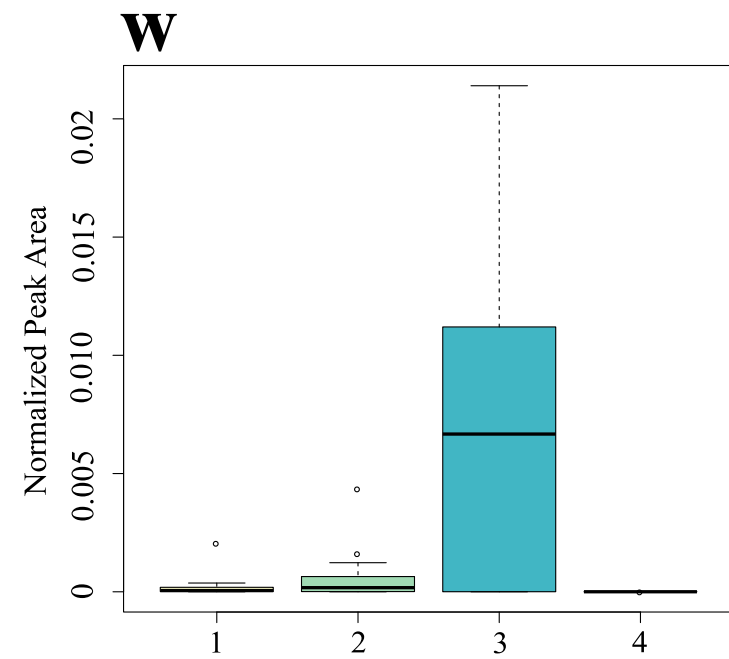

**x**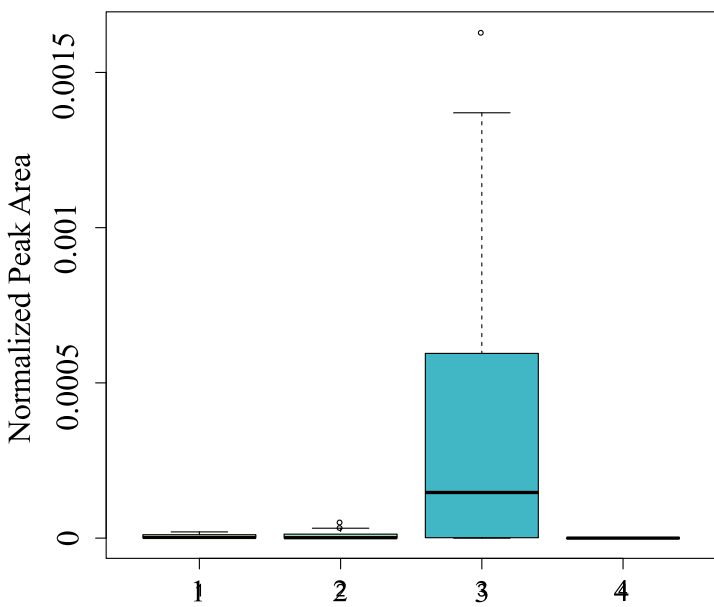**y**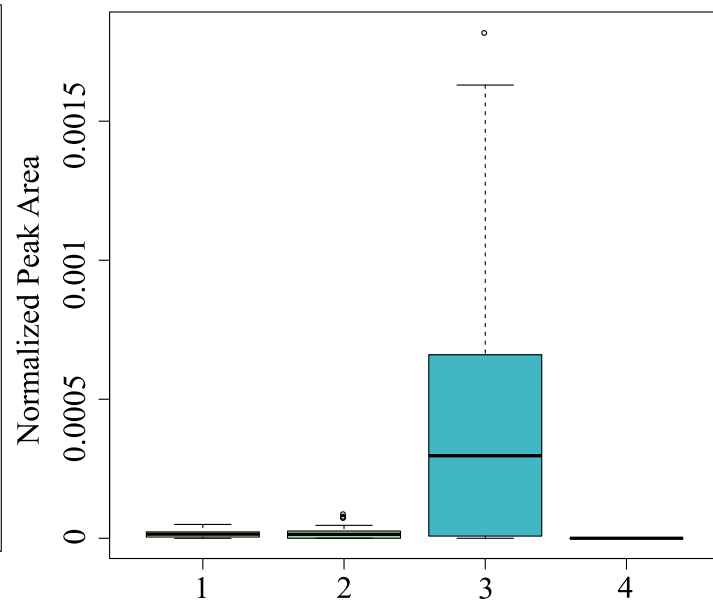**z**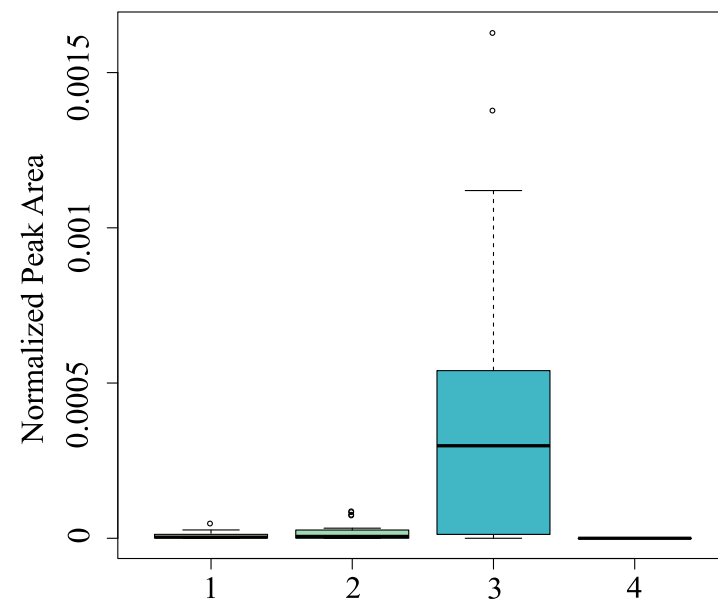**aa**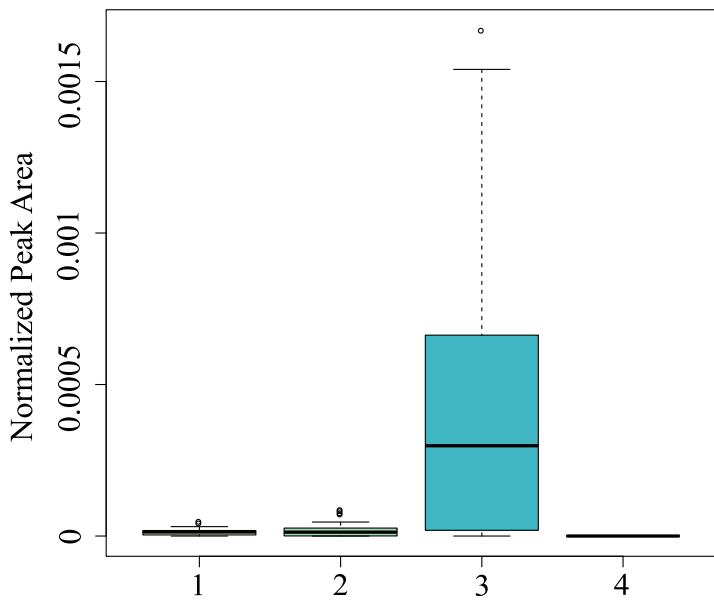**ab**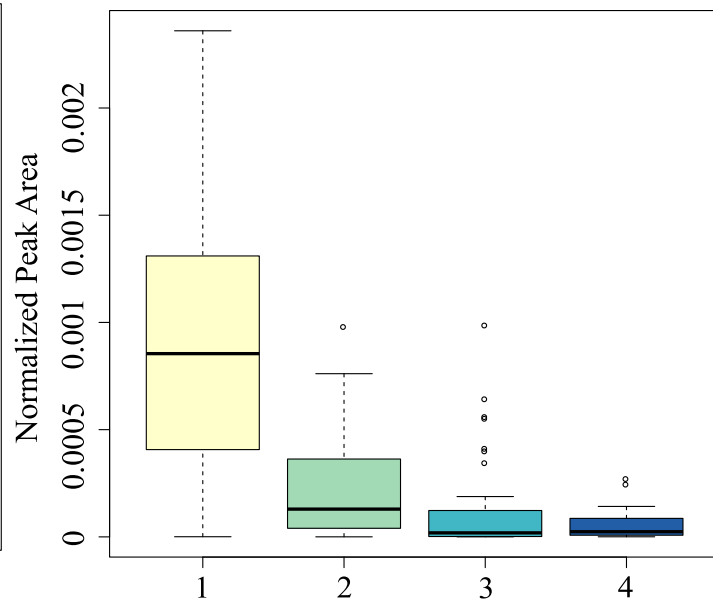**ac**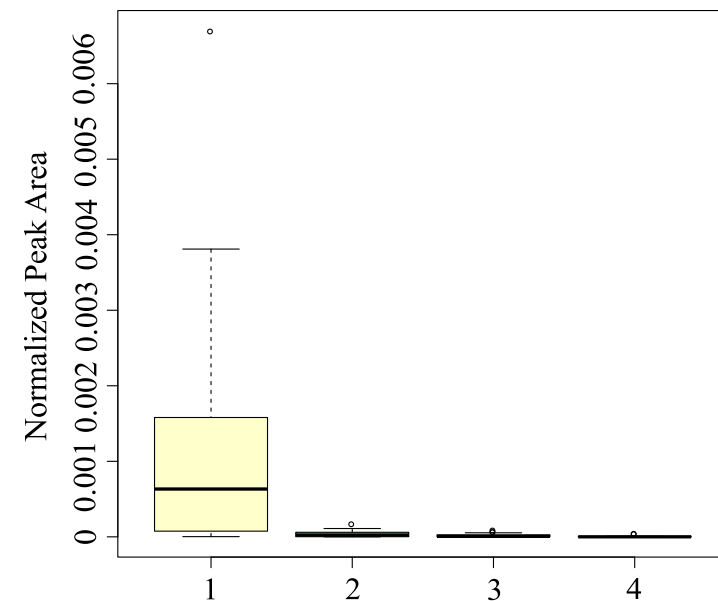

**ad**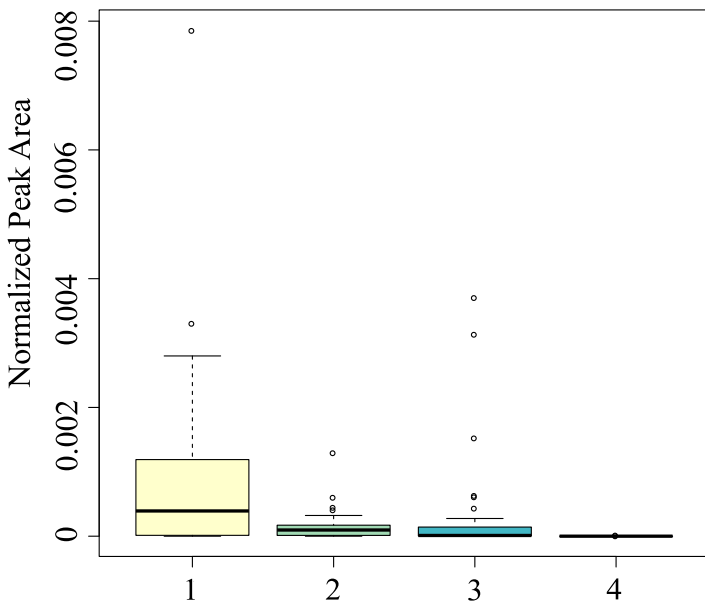**ae**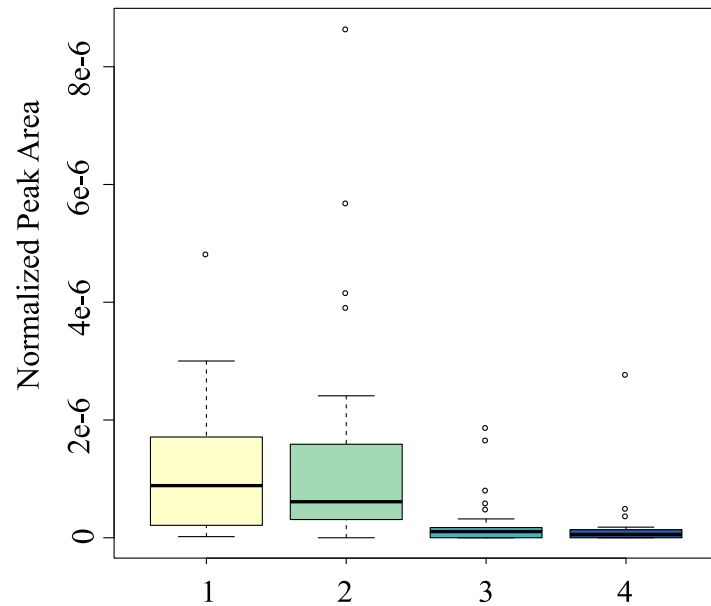**af**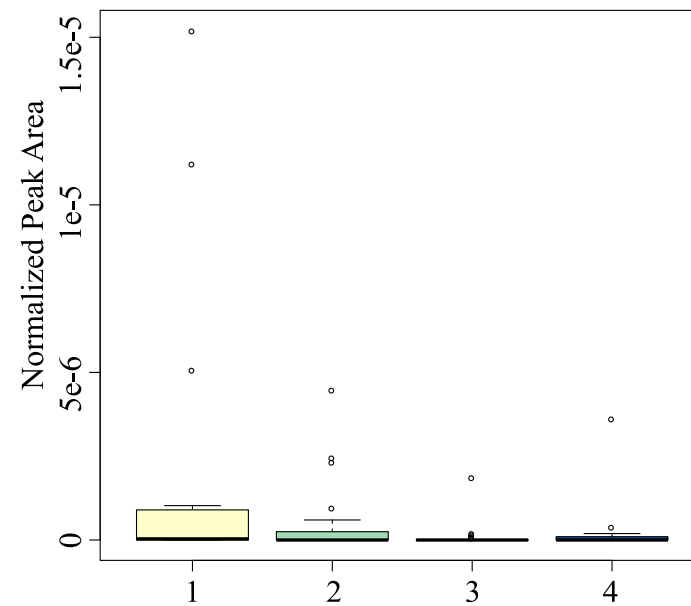**ag**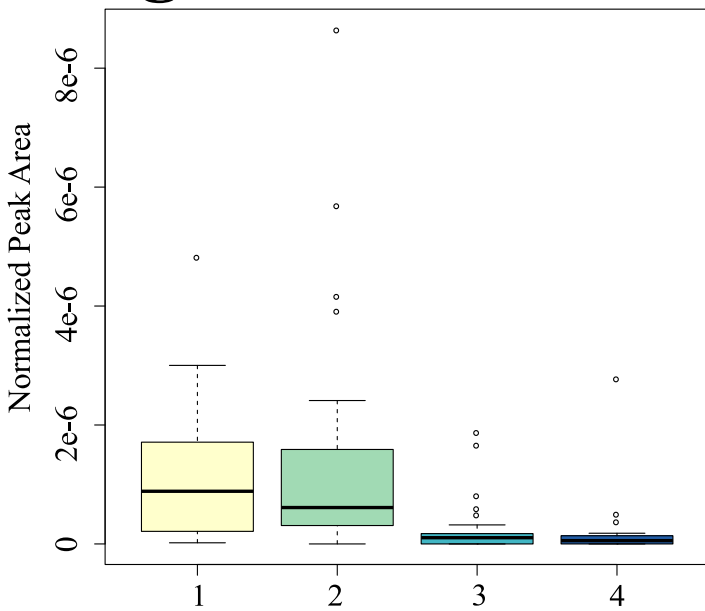**ah**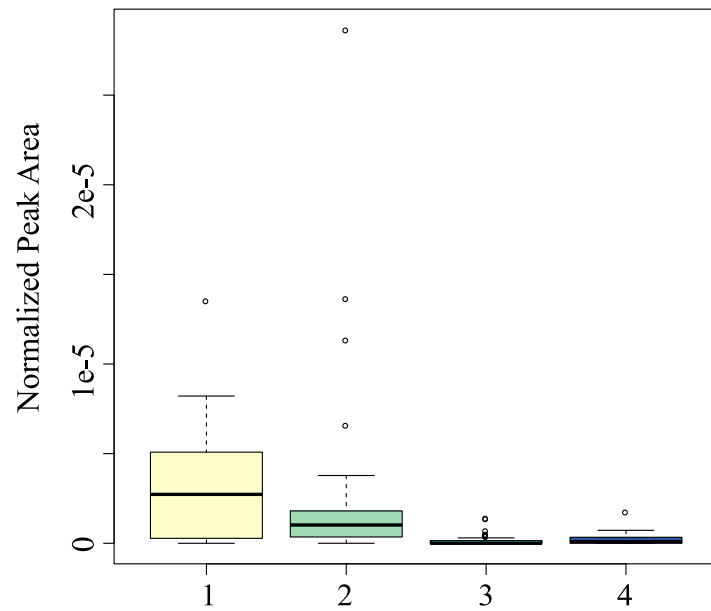**ai**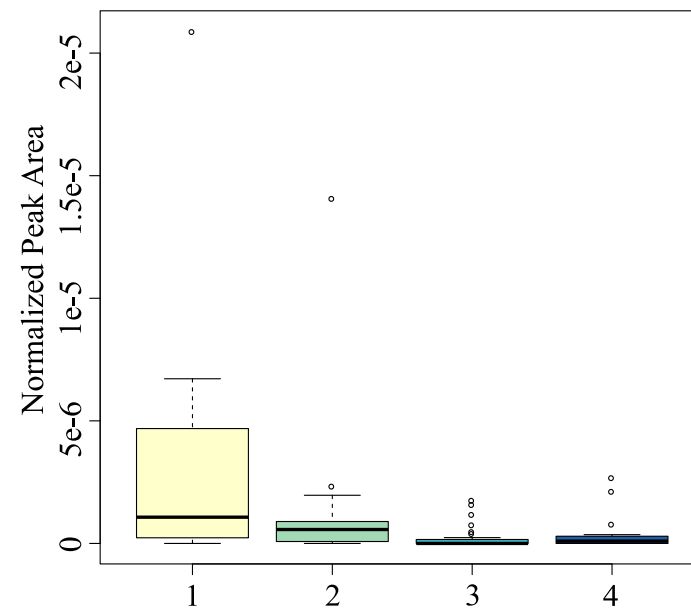

**aj**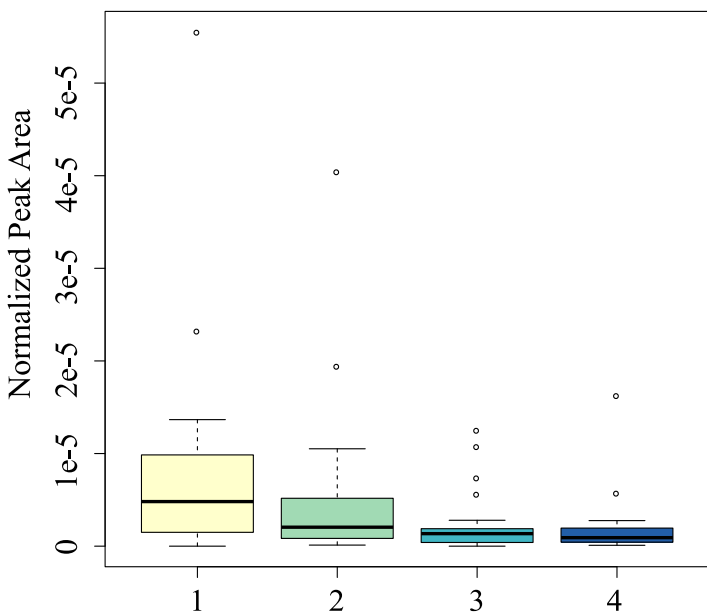**ak**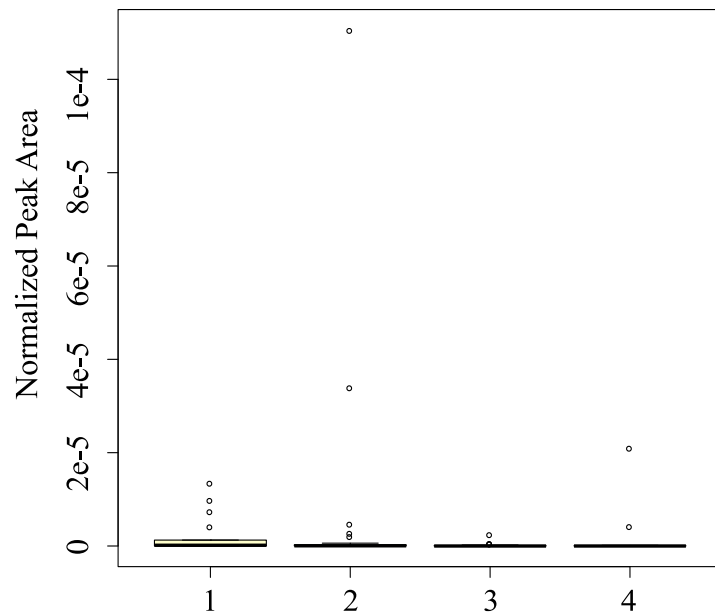**al**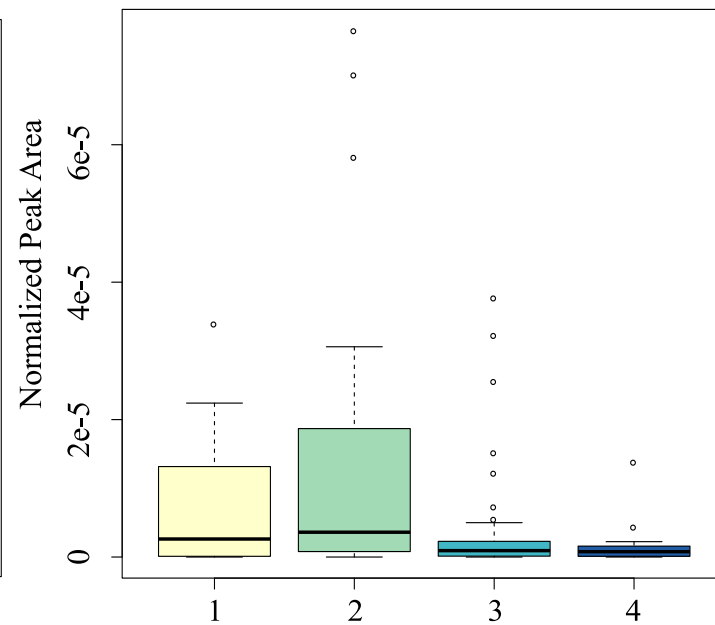**am**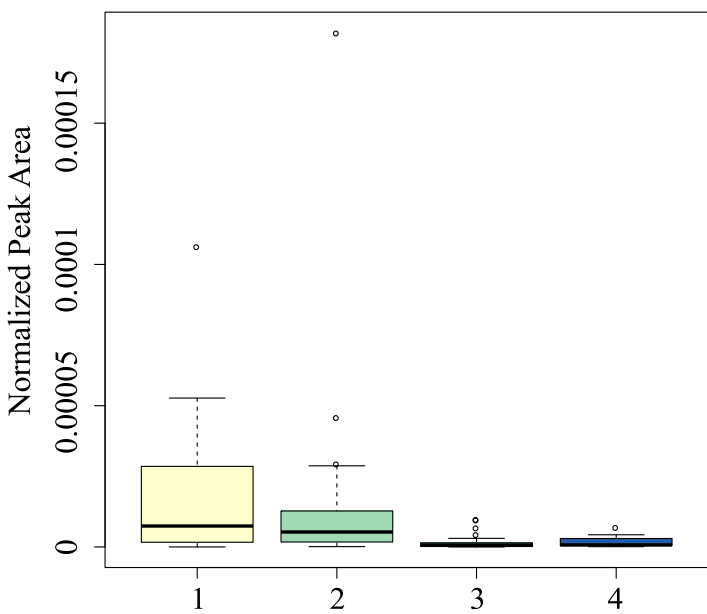**an**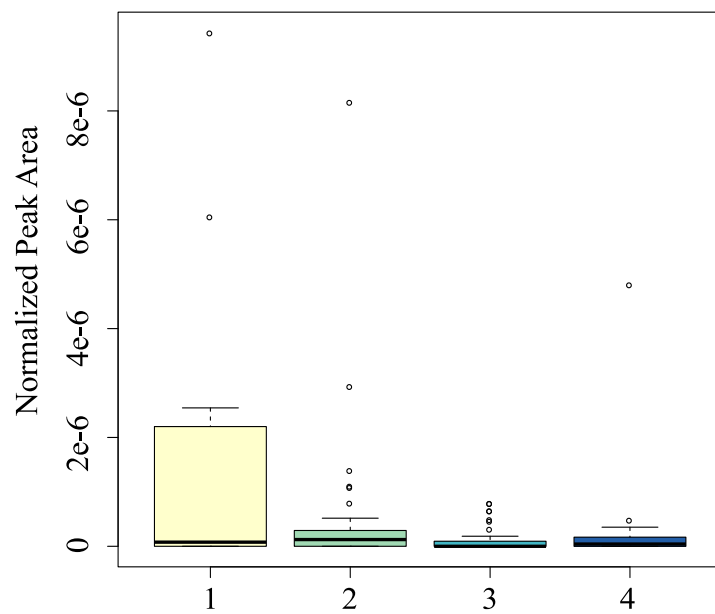**ao**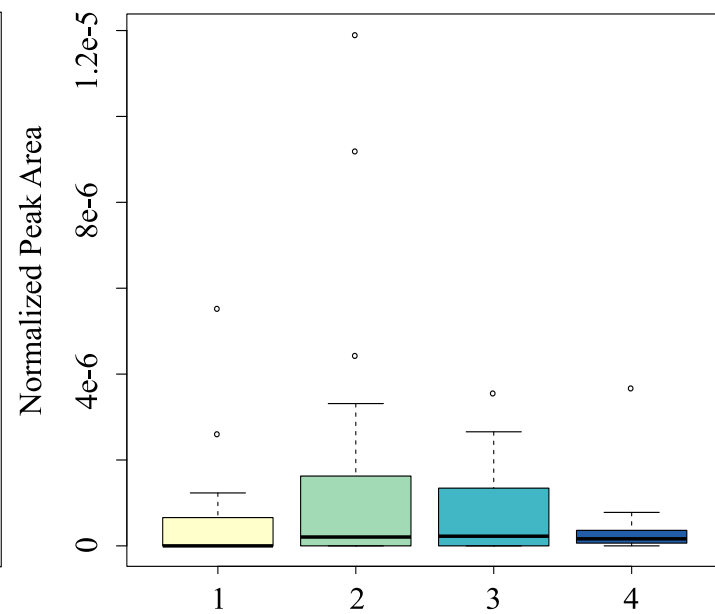

**ap**

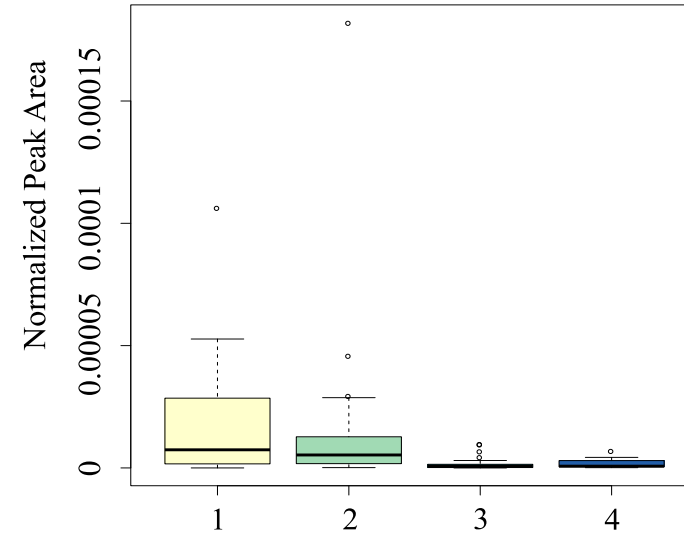

Supplement: msystems.00710-22-s0002.pdf [file msystems.00710-22-s0002.pdf]
