# Supplementary material for: Untargeted Fecal Metabolomic Analyses across an Industrialization Gradient Reveal Shared Metabolites and Impact of Industrialization on Fecal Microbiome-Metabolome Interactions
Source: PubMed Central journal article supplement (PMC9765122; doi:10.1128/msystems.00710-22), 2022-11-23

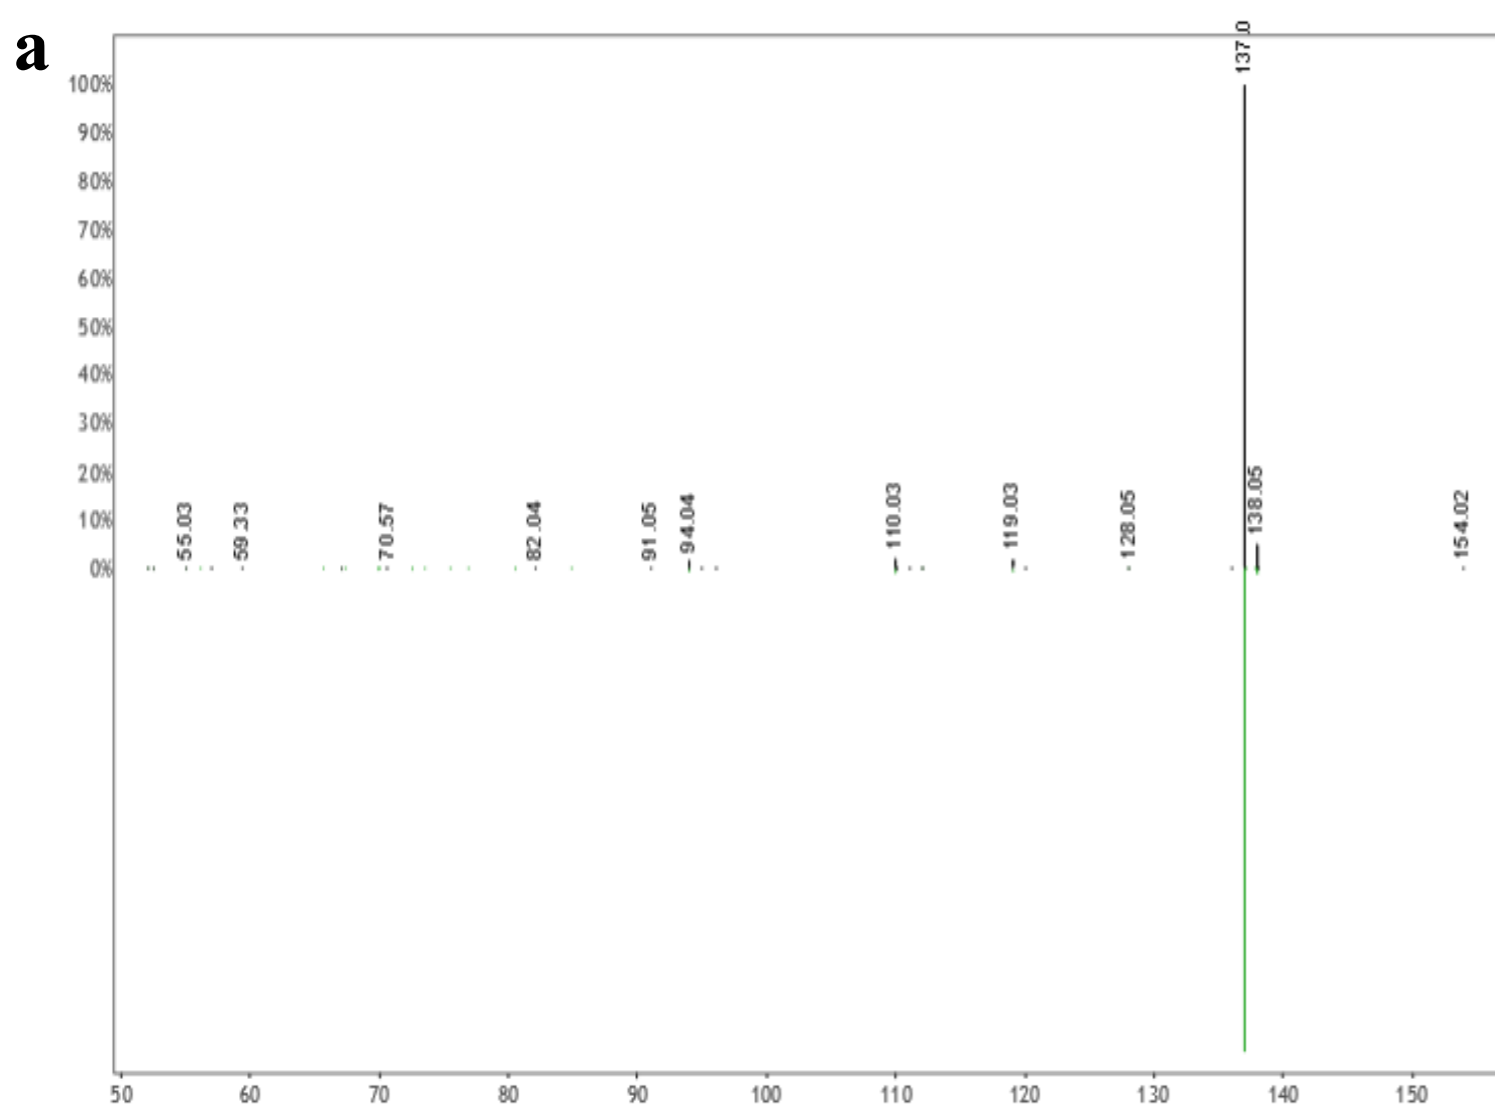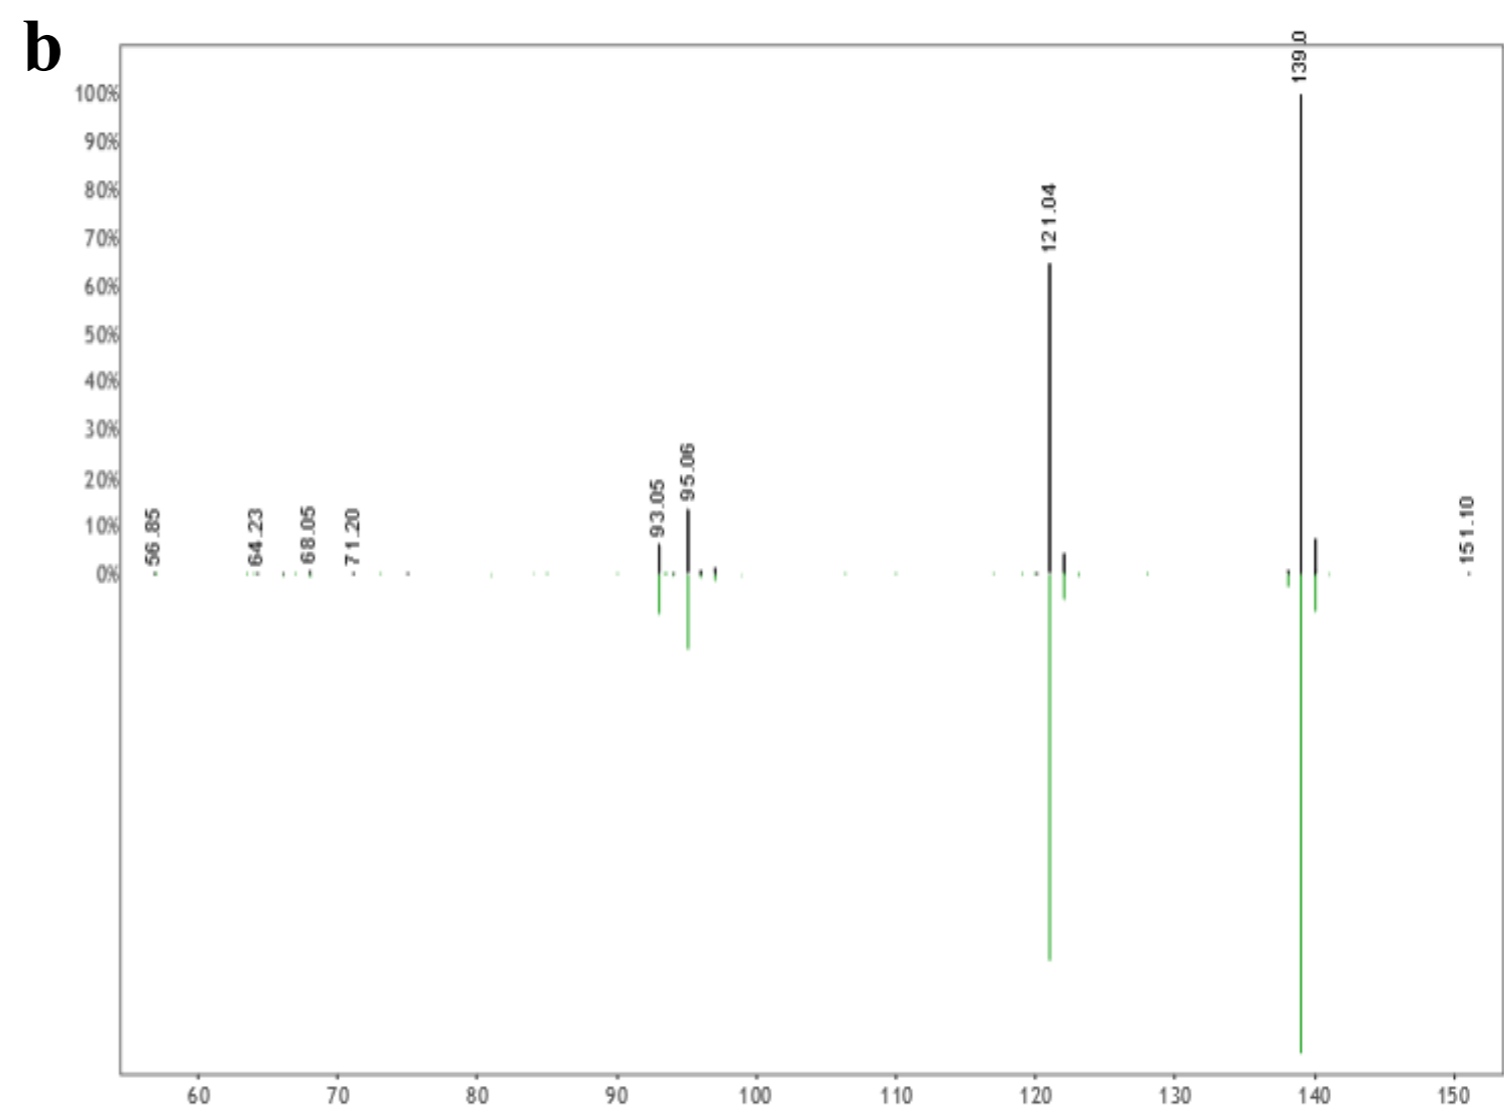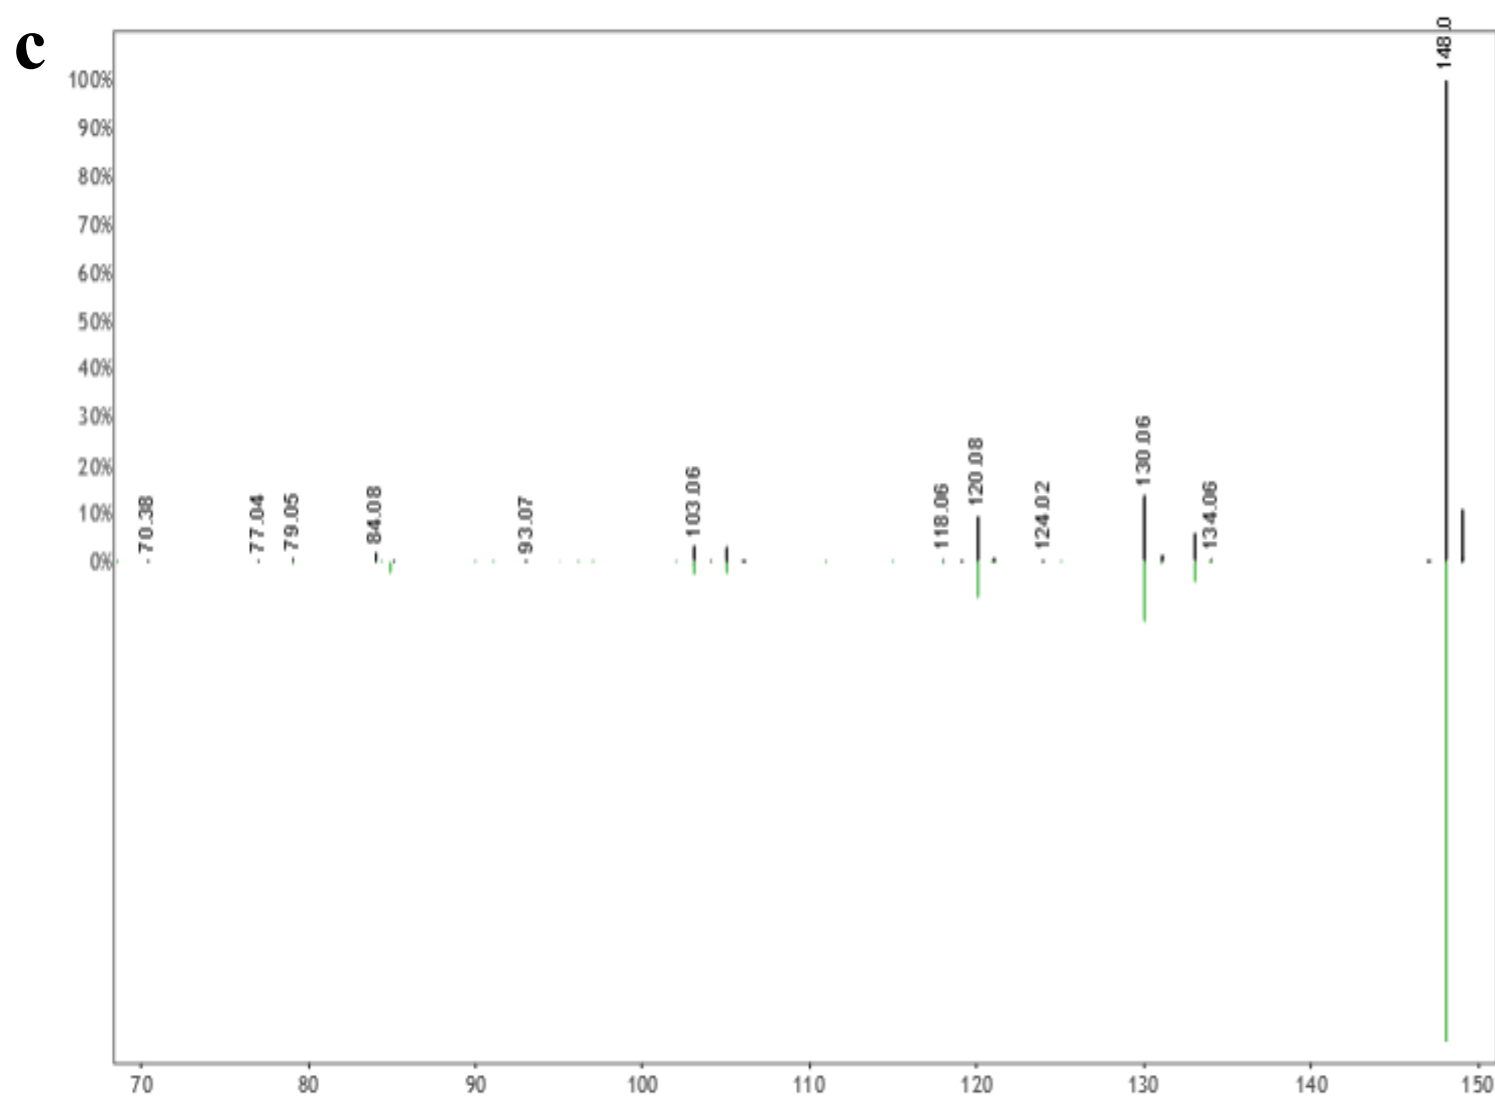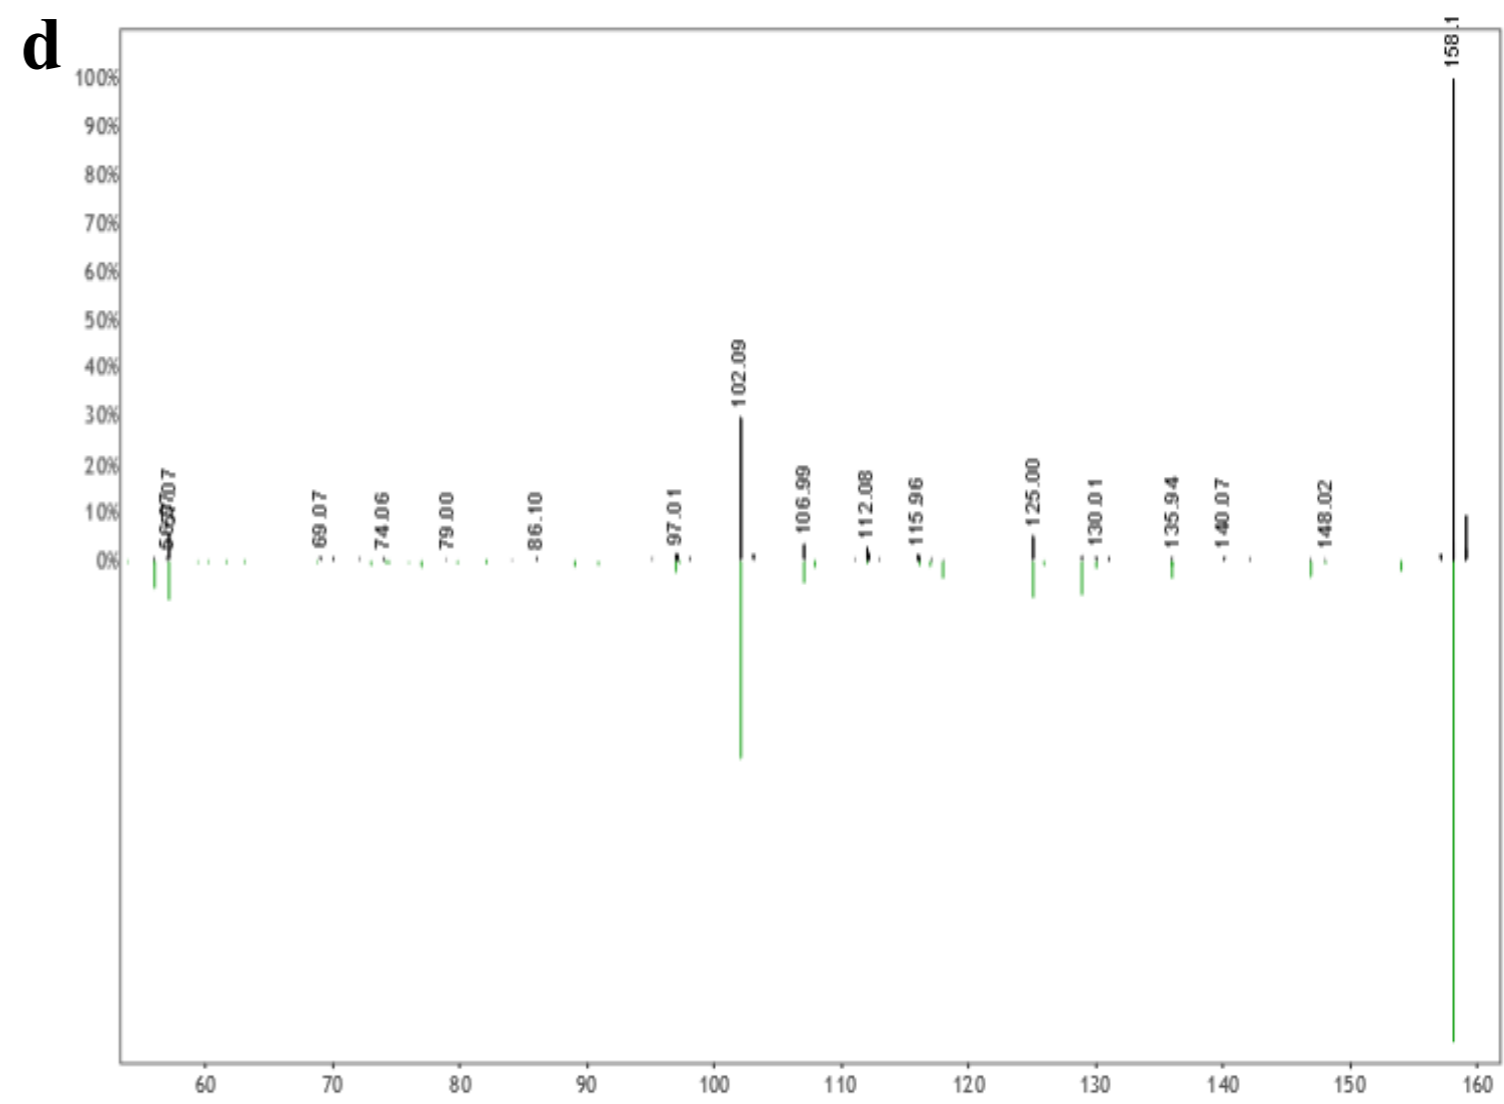

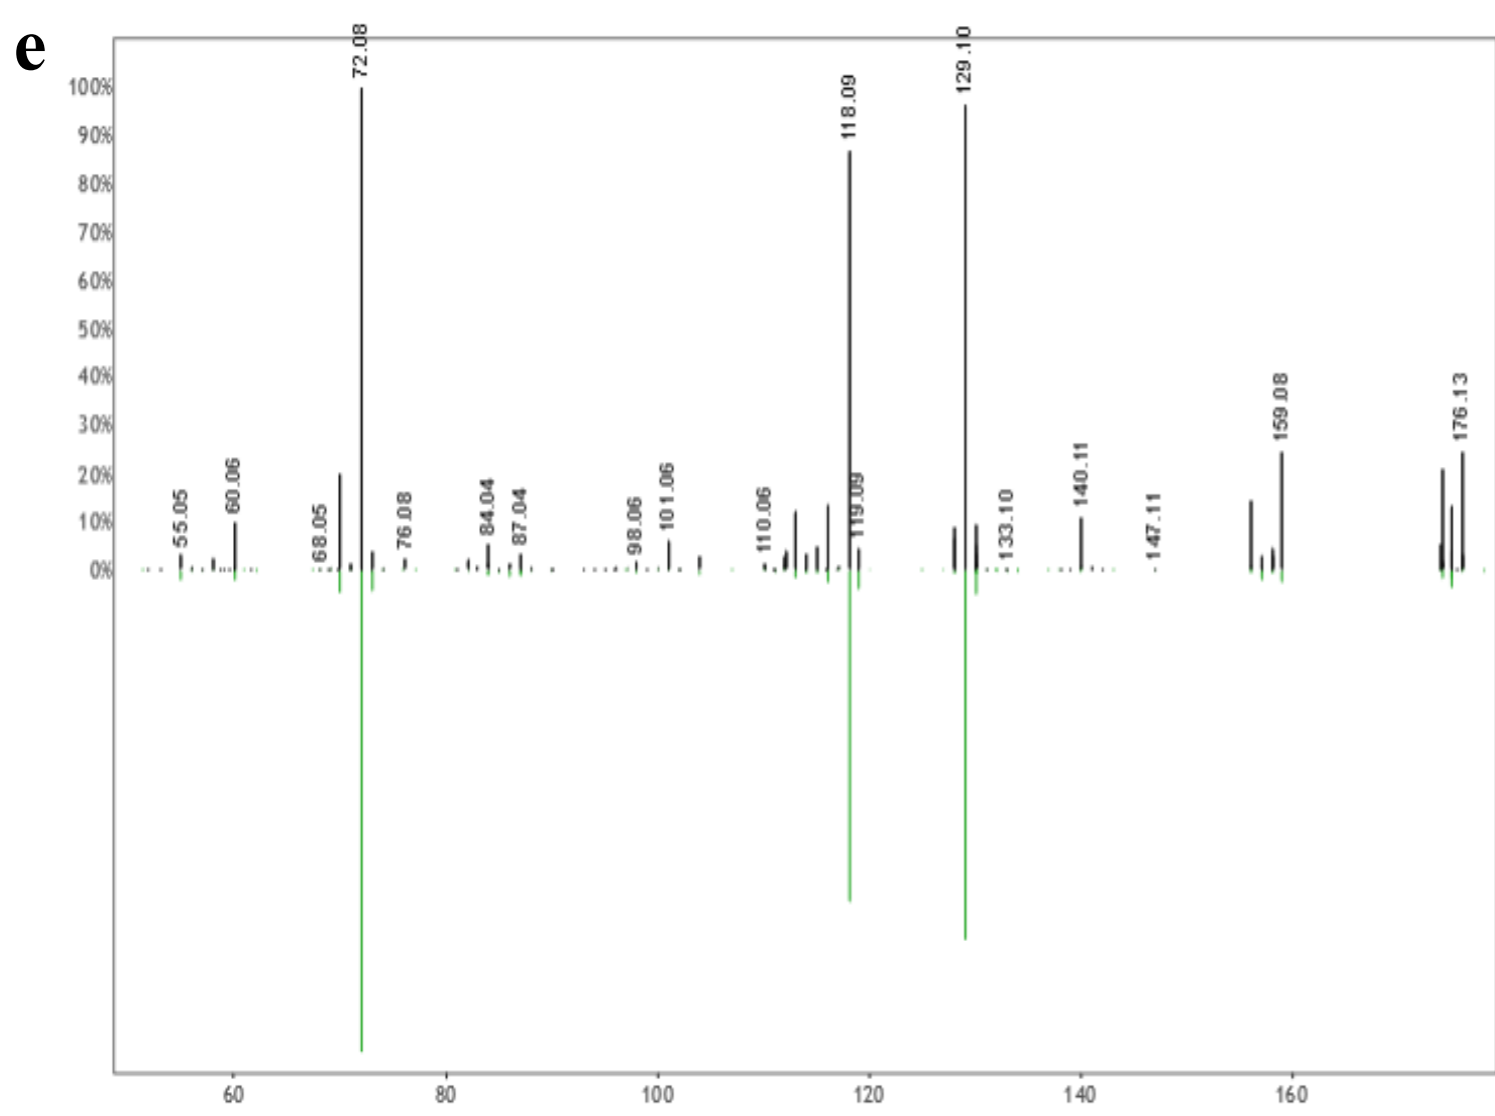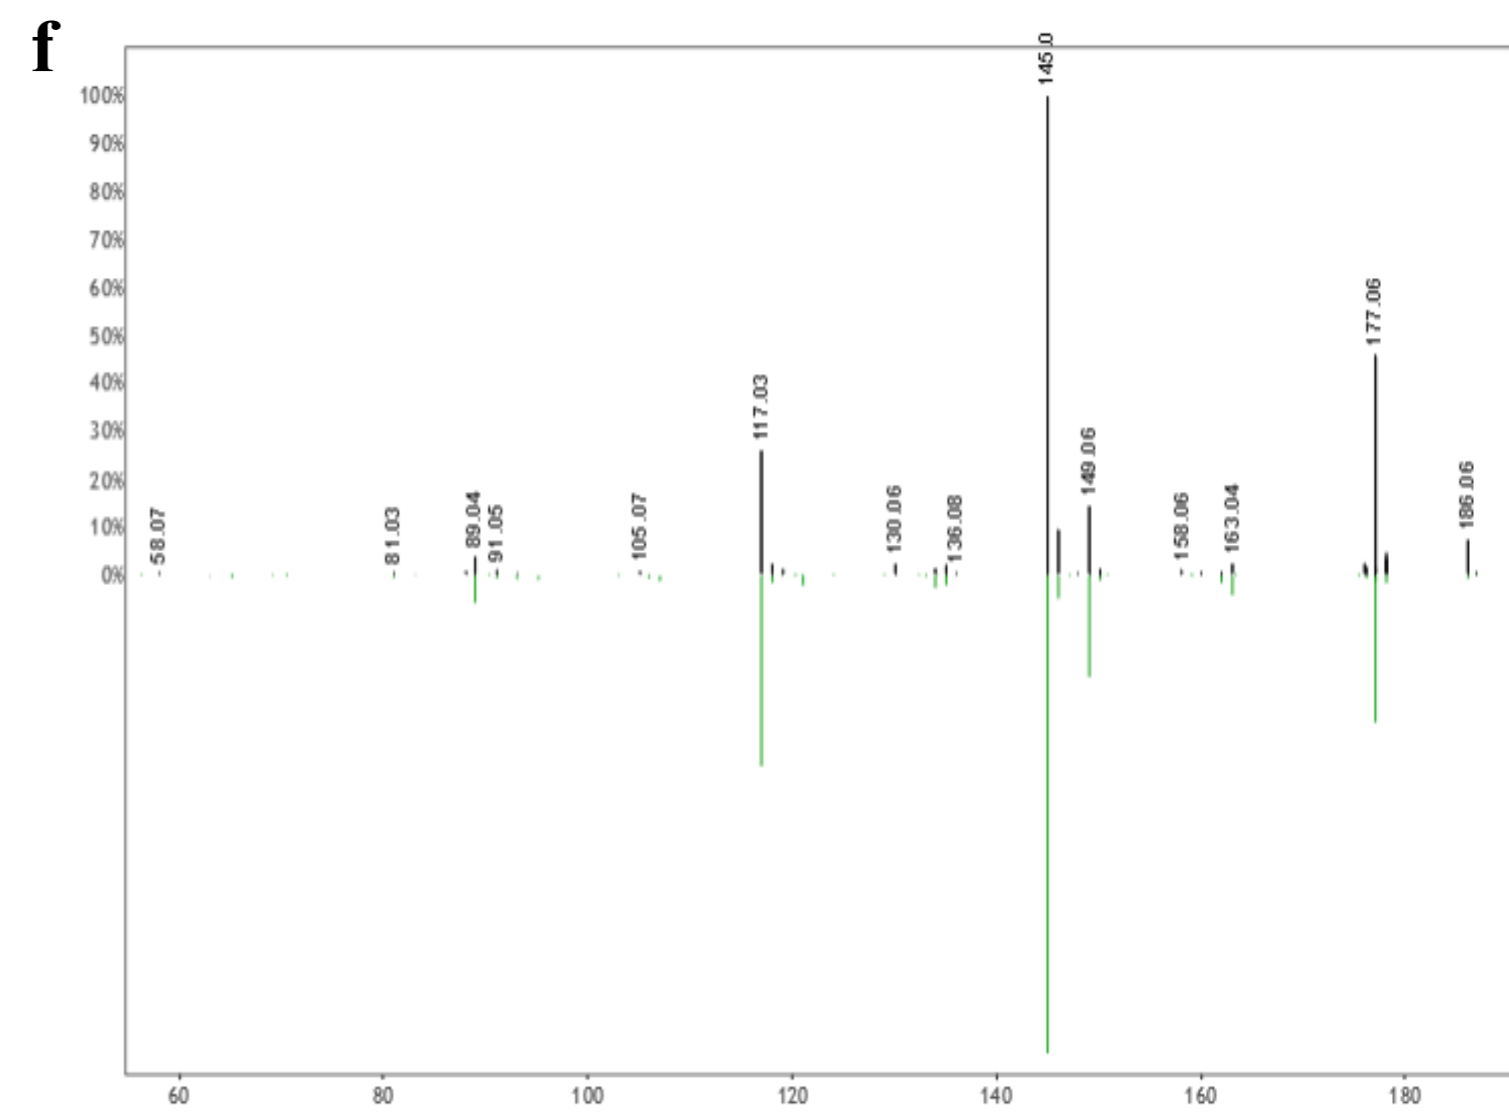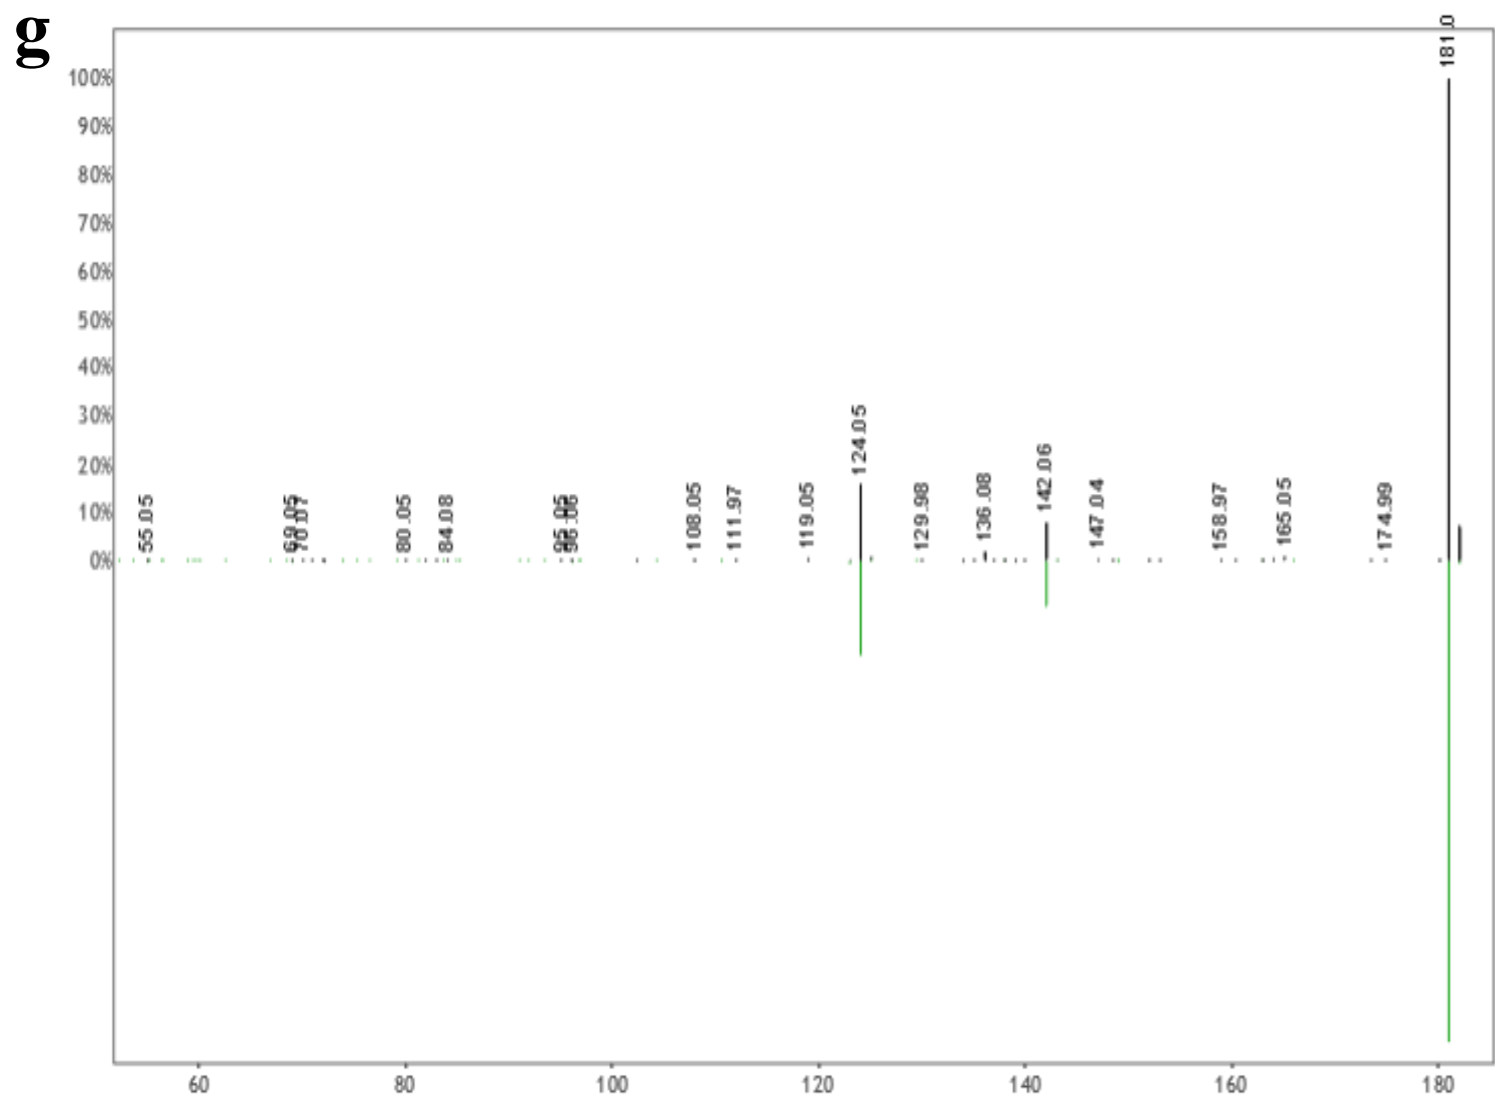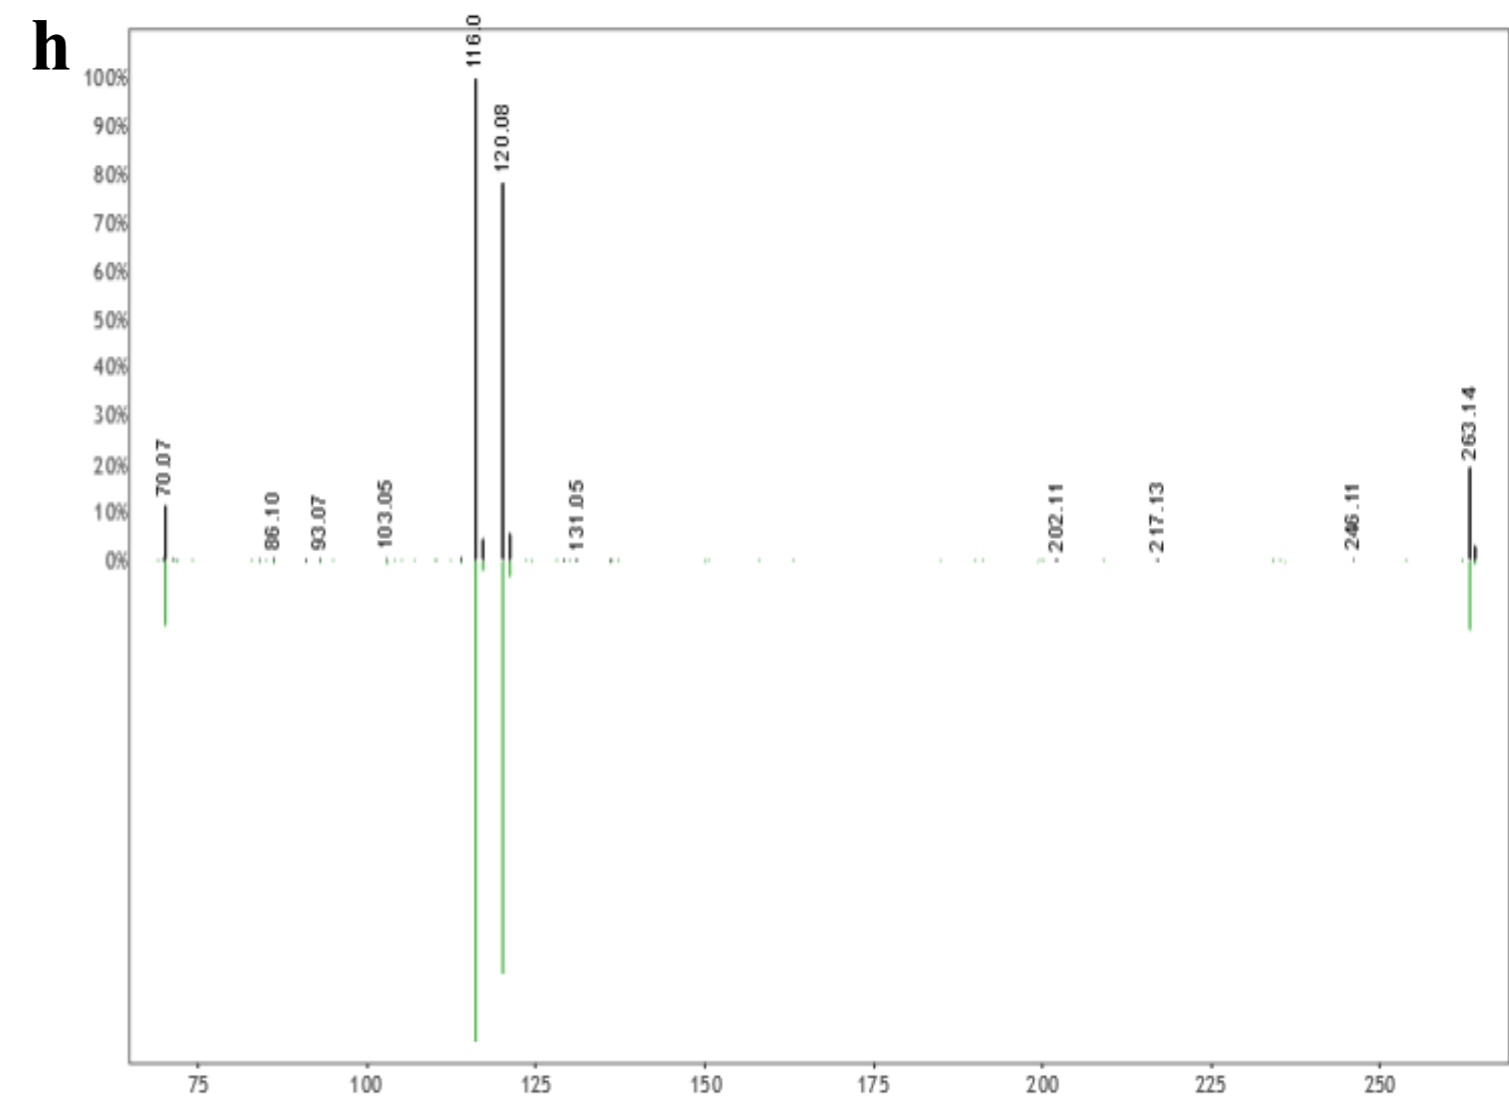

**i**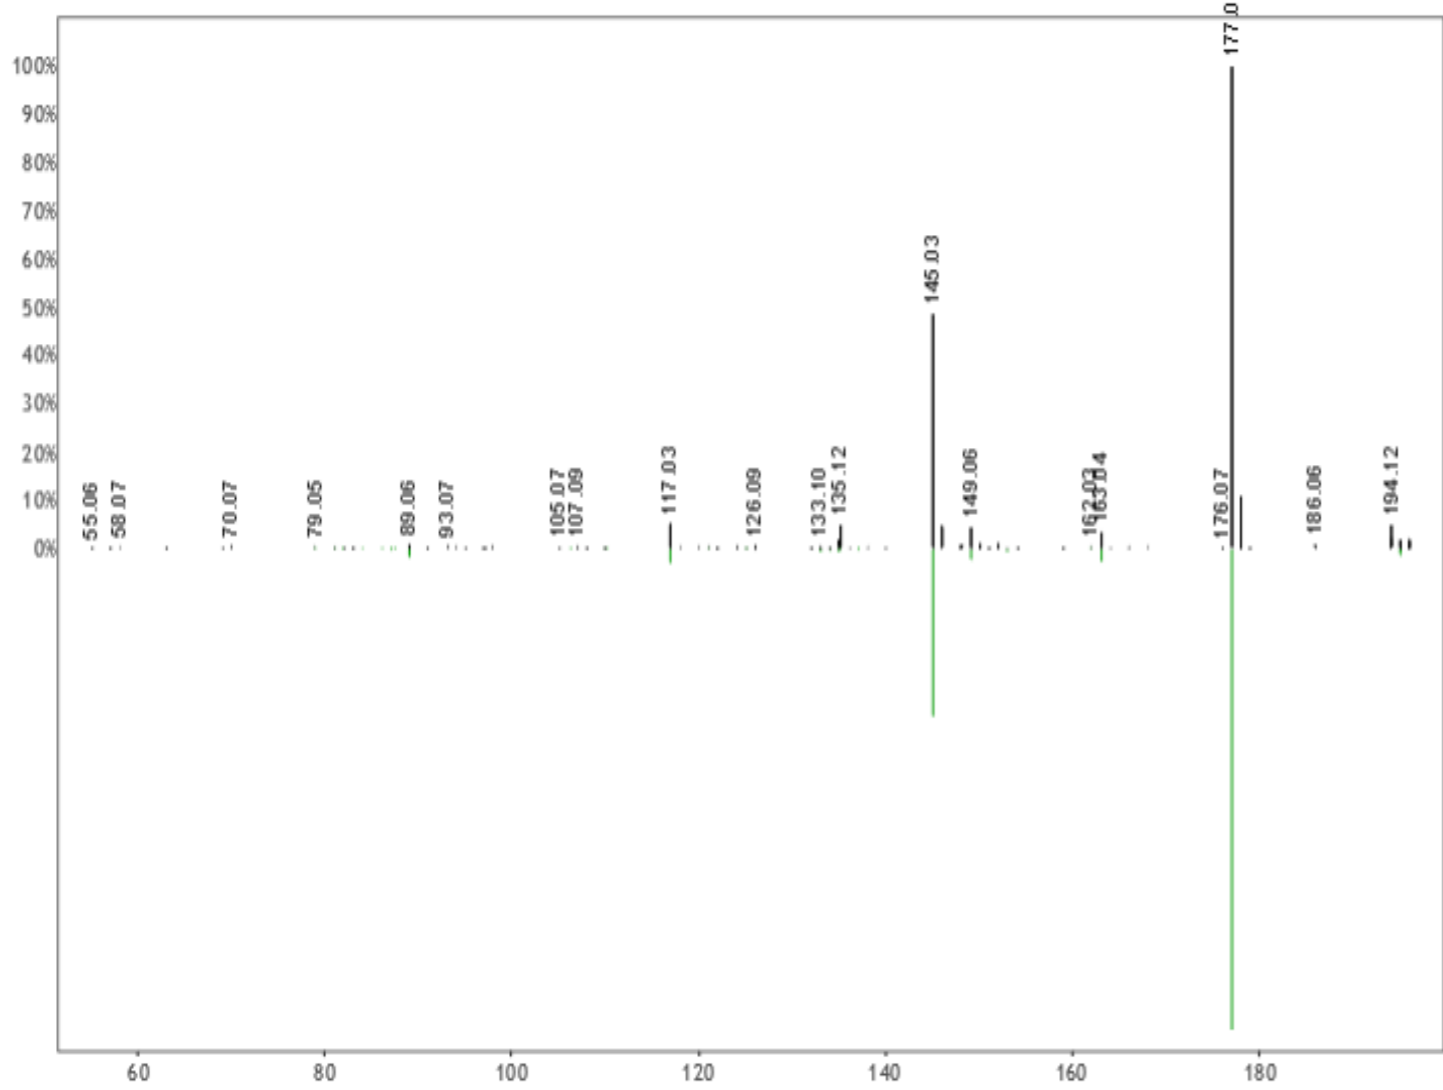**j**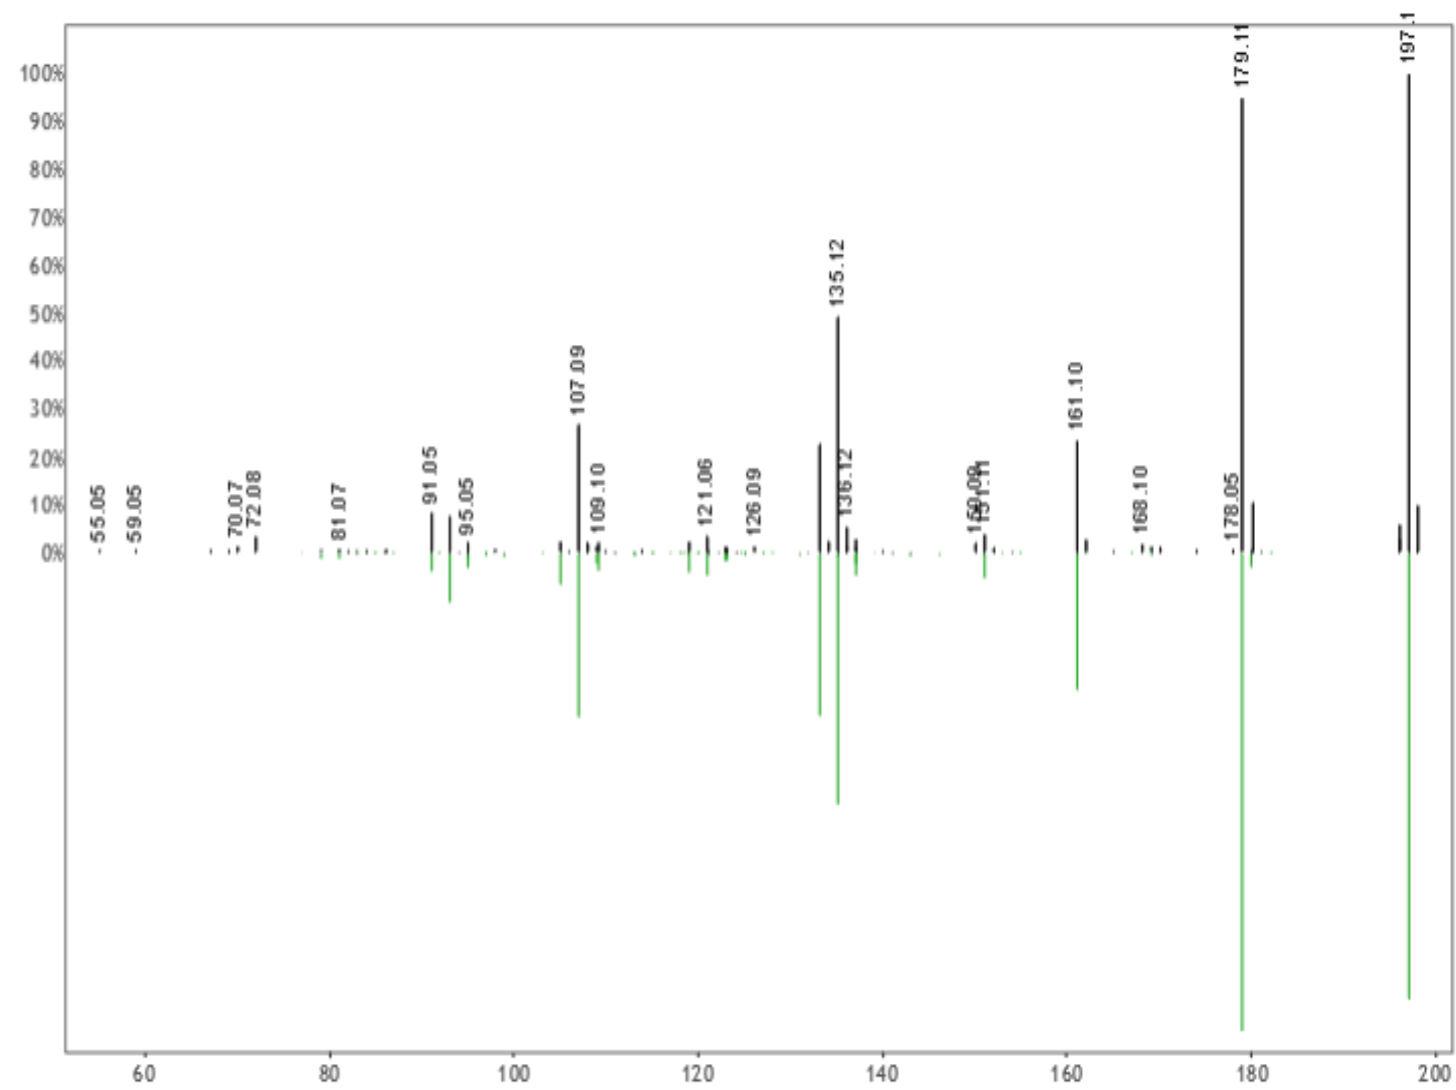**k**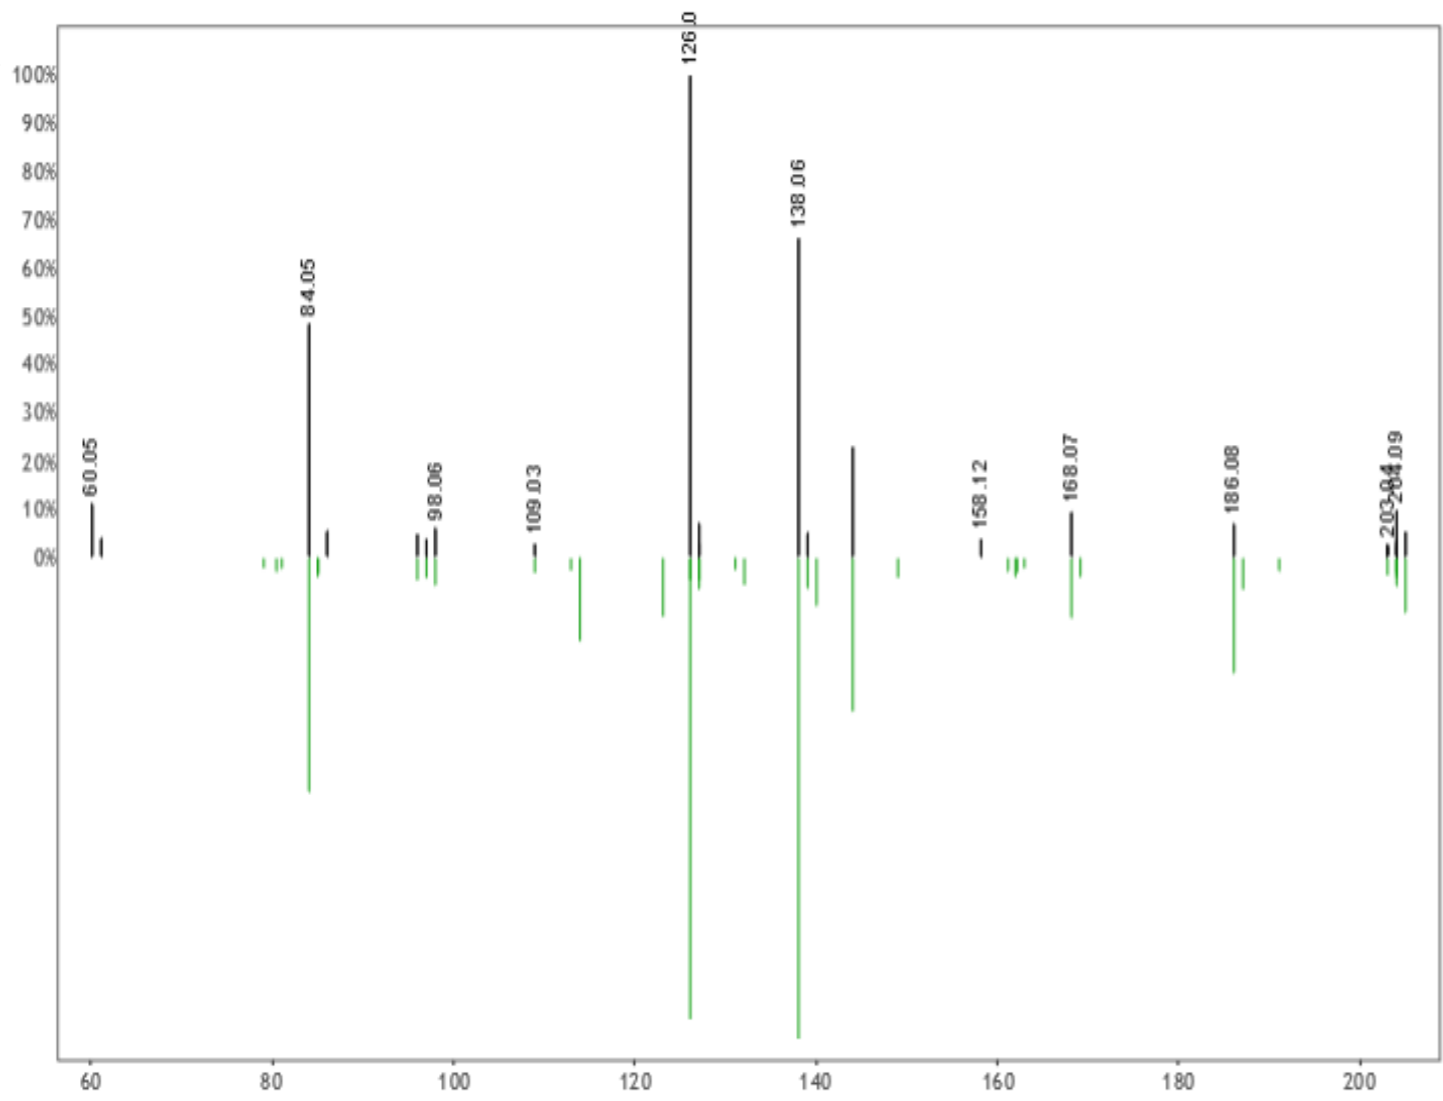**l**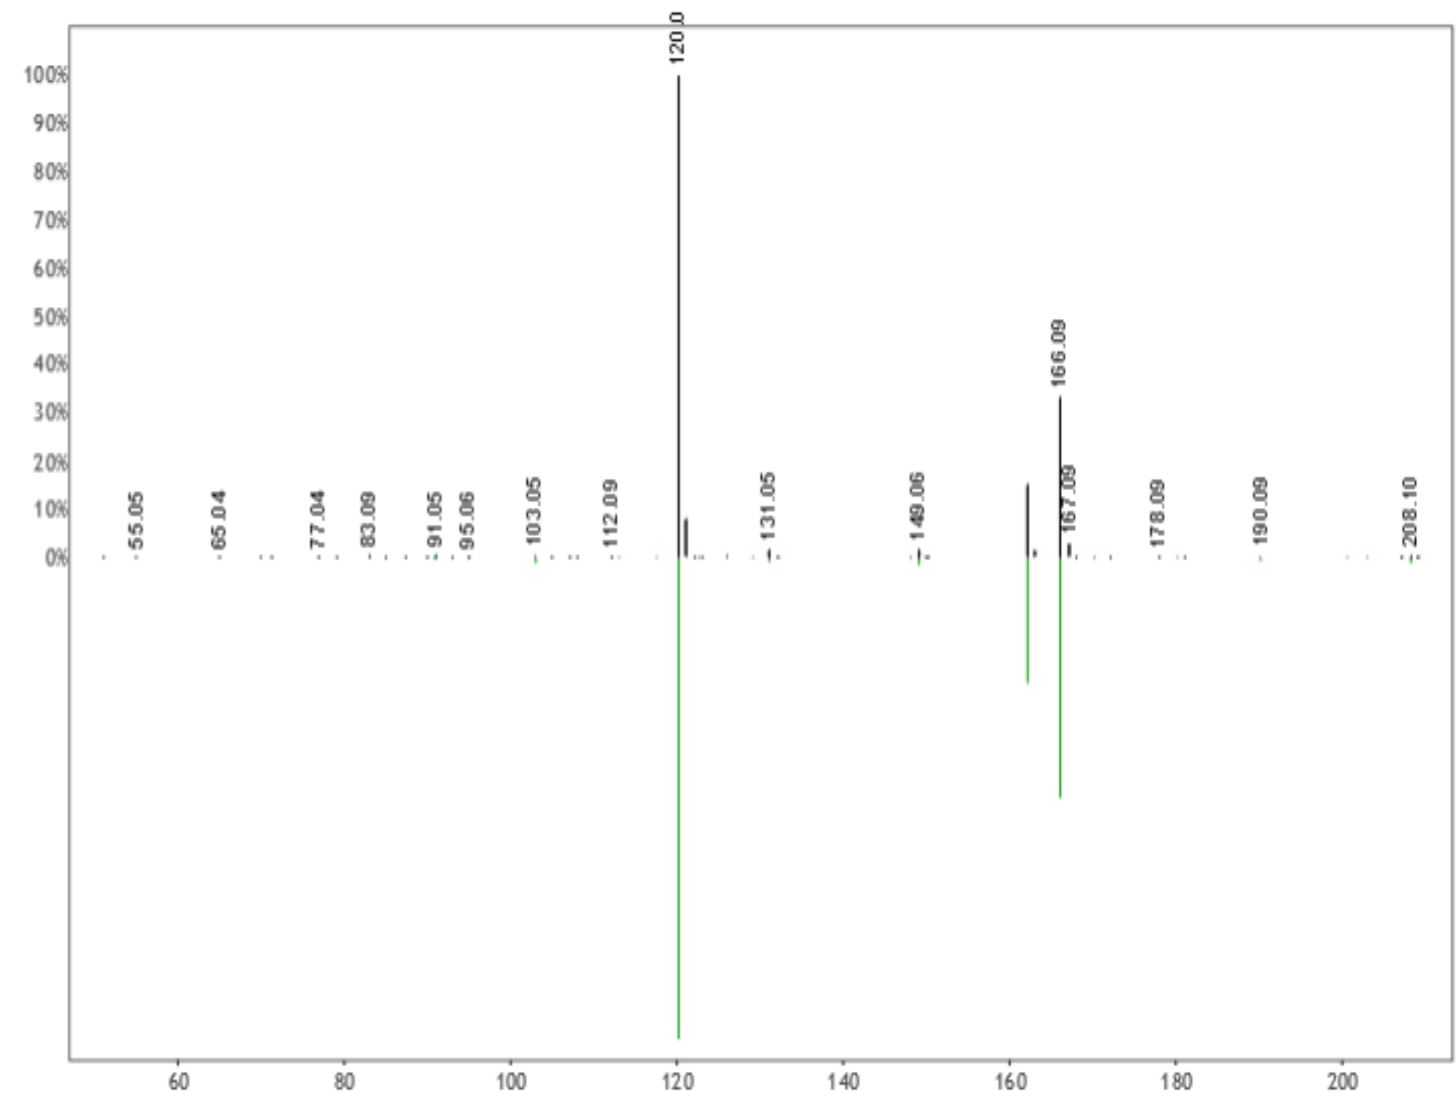

**m**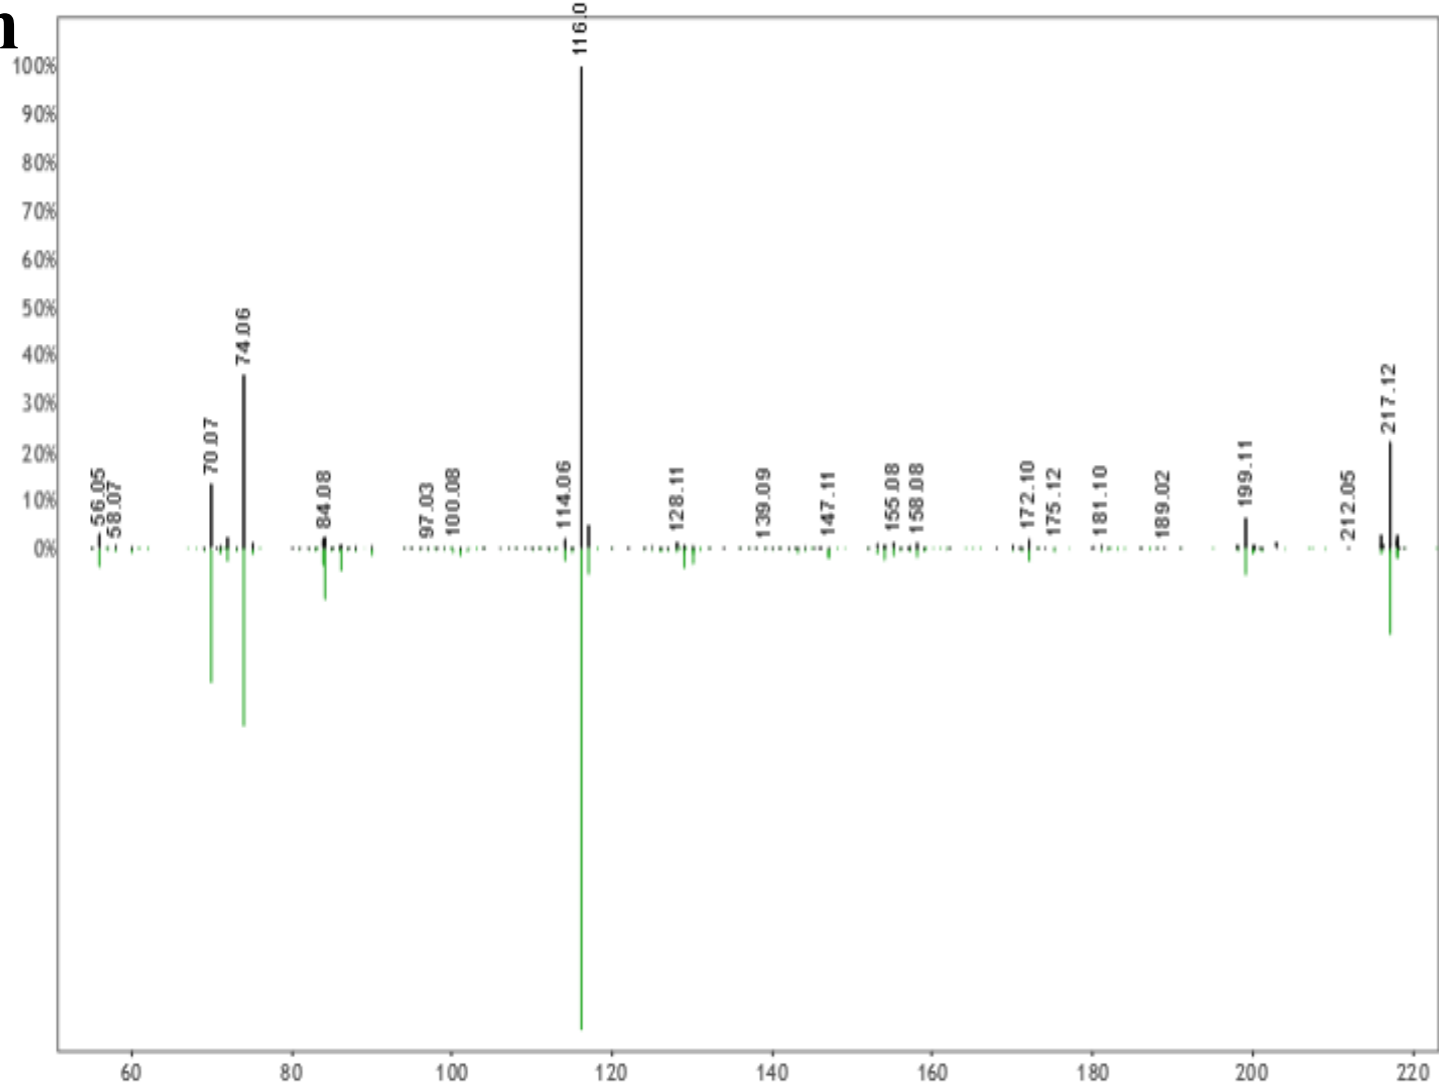**n**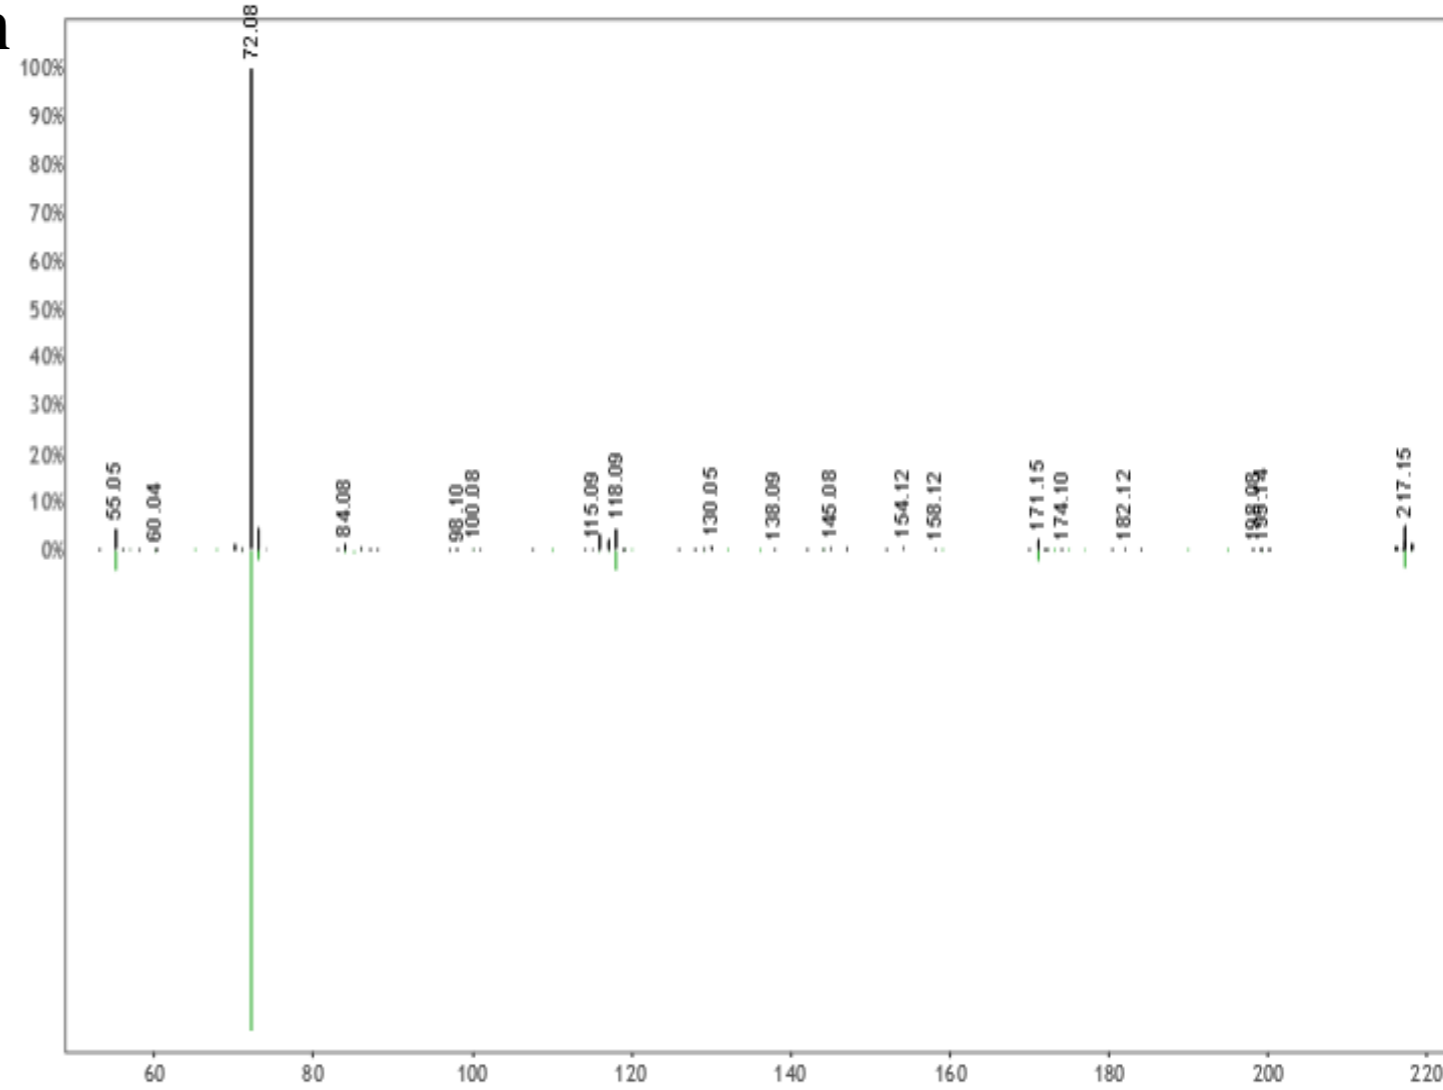**o**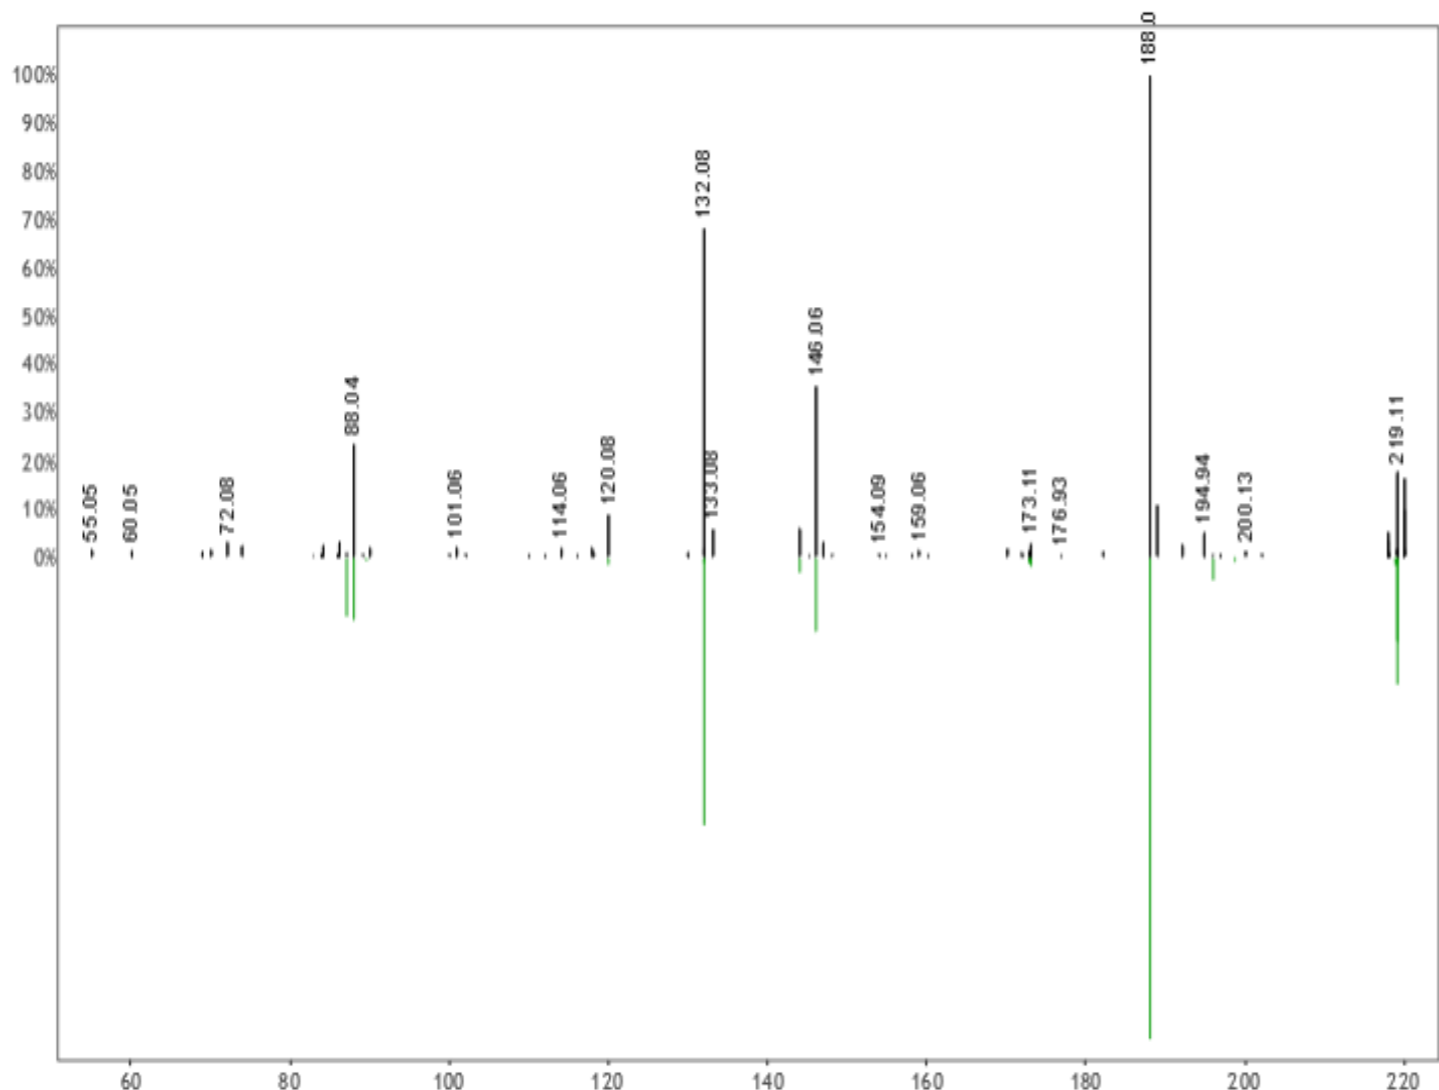**p**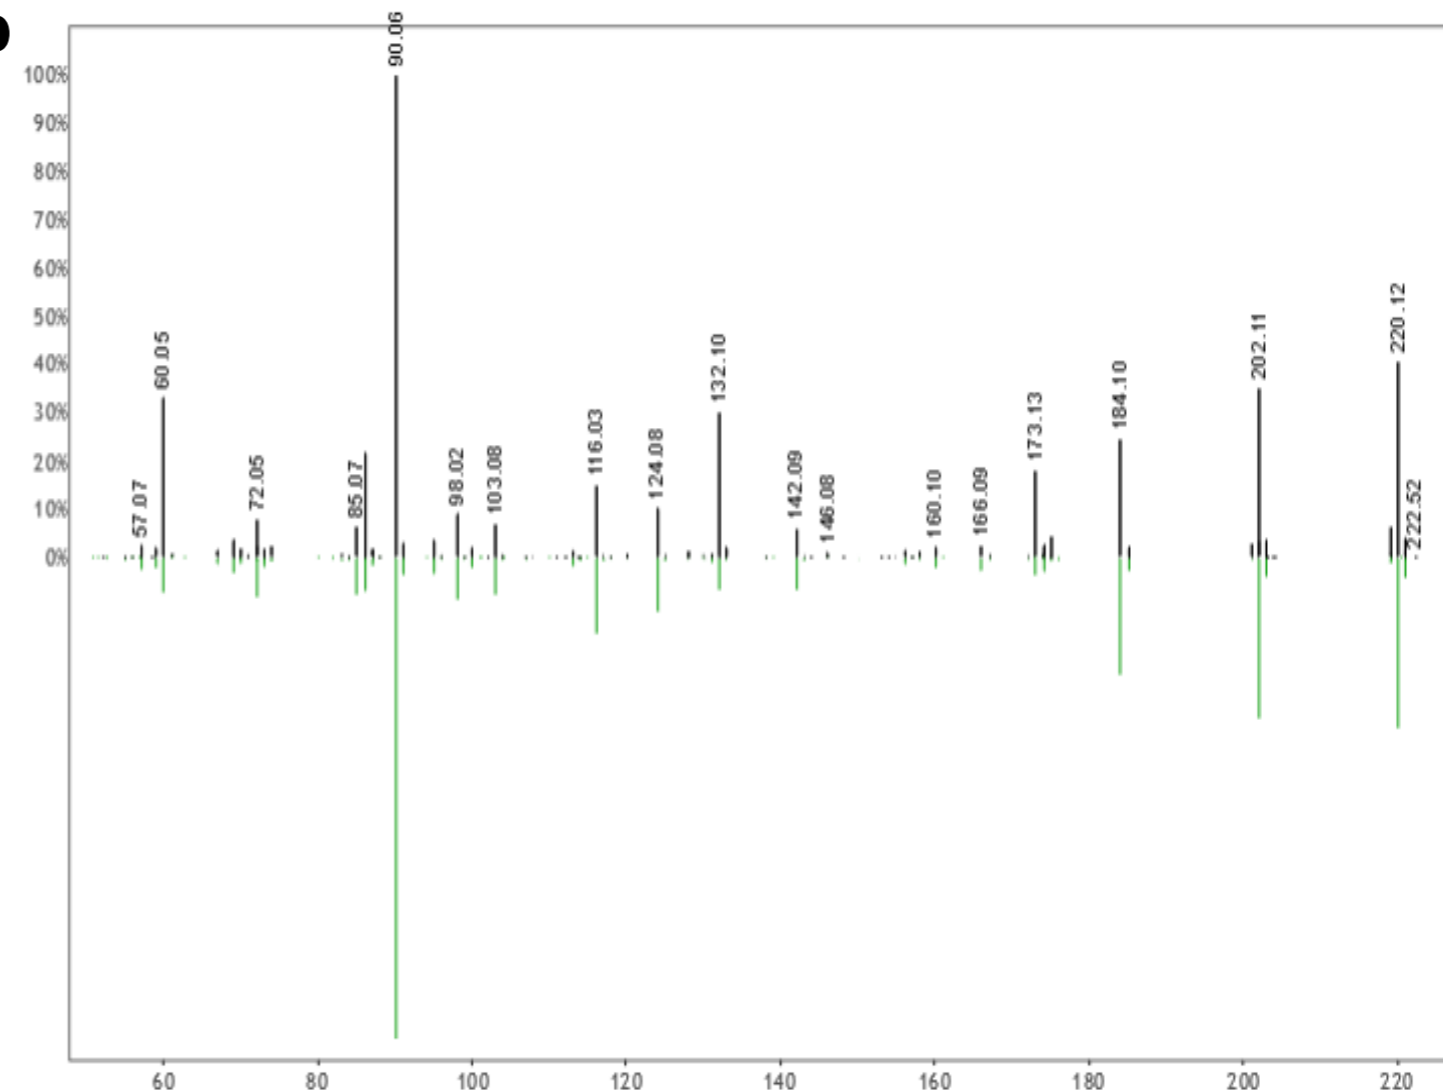

**q**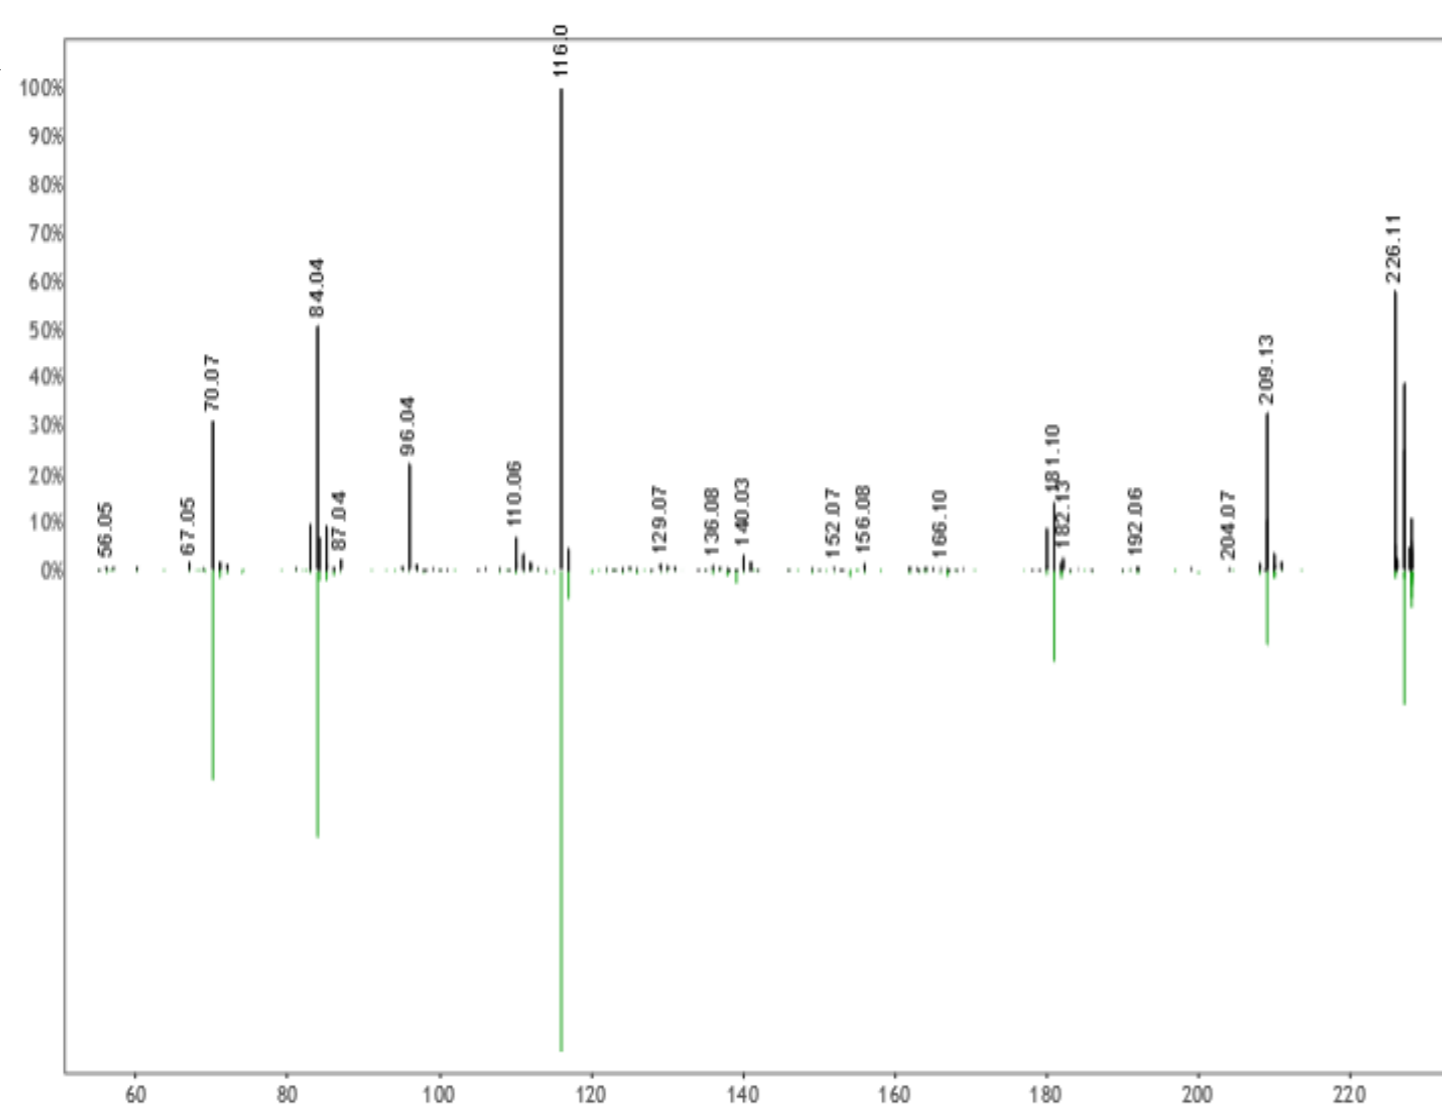**r**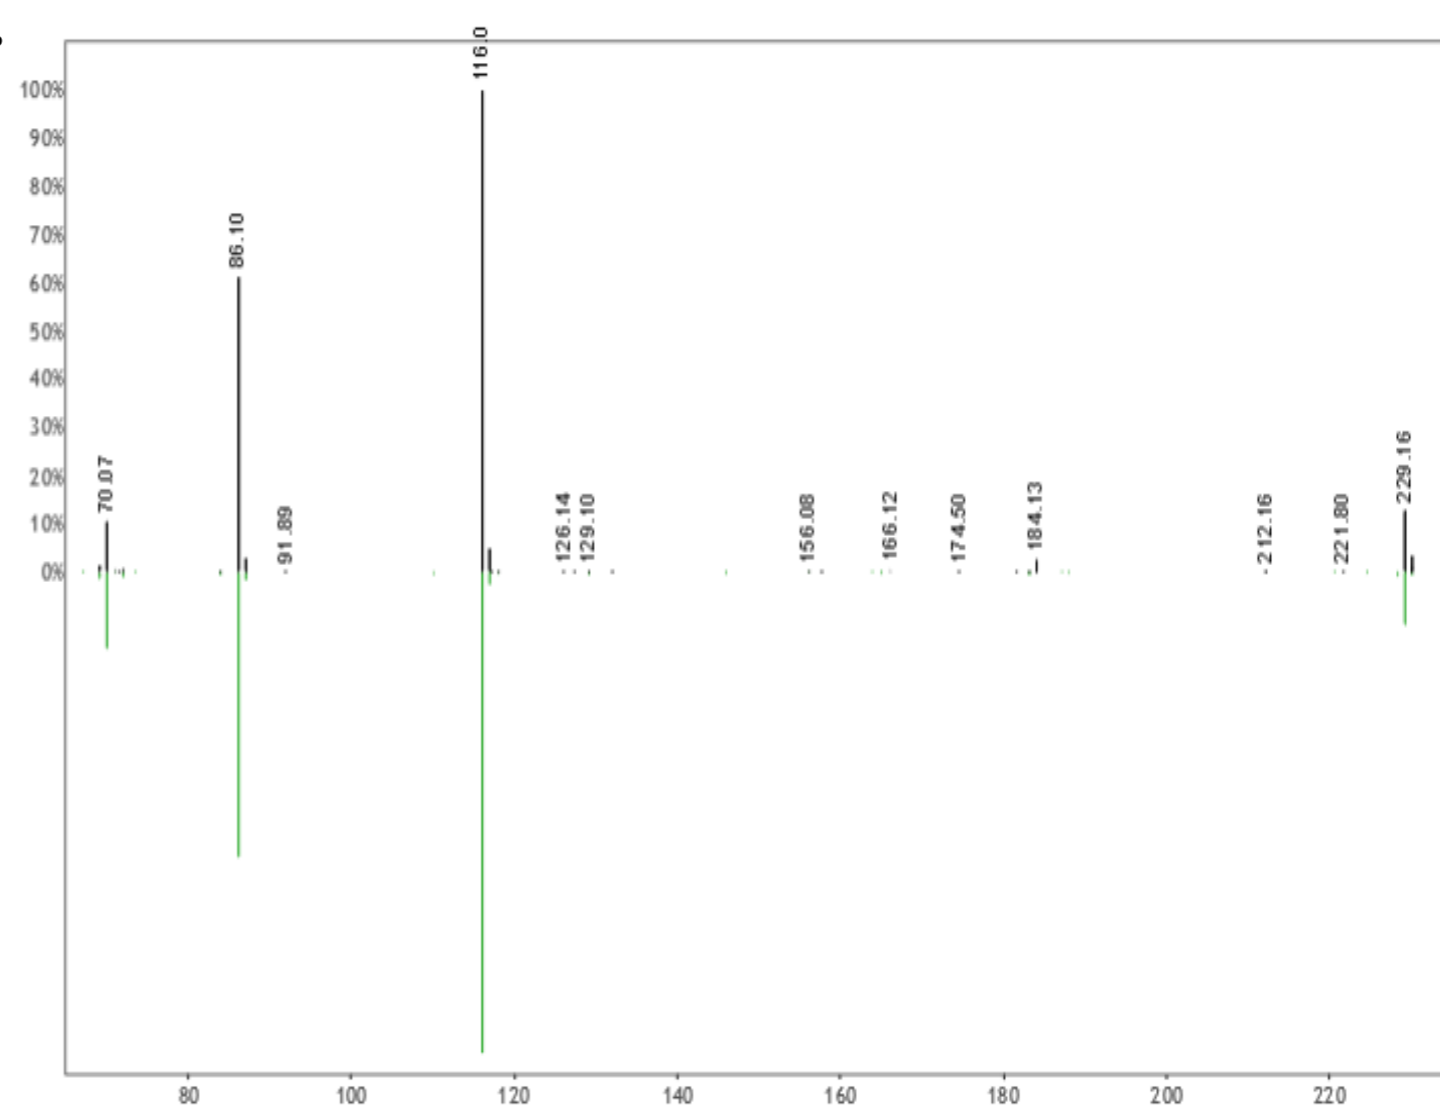**s**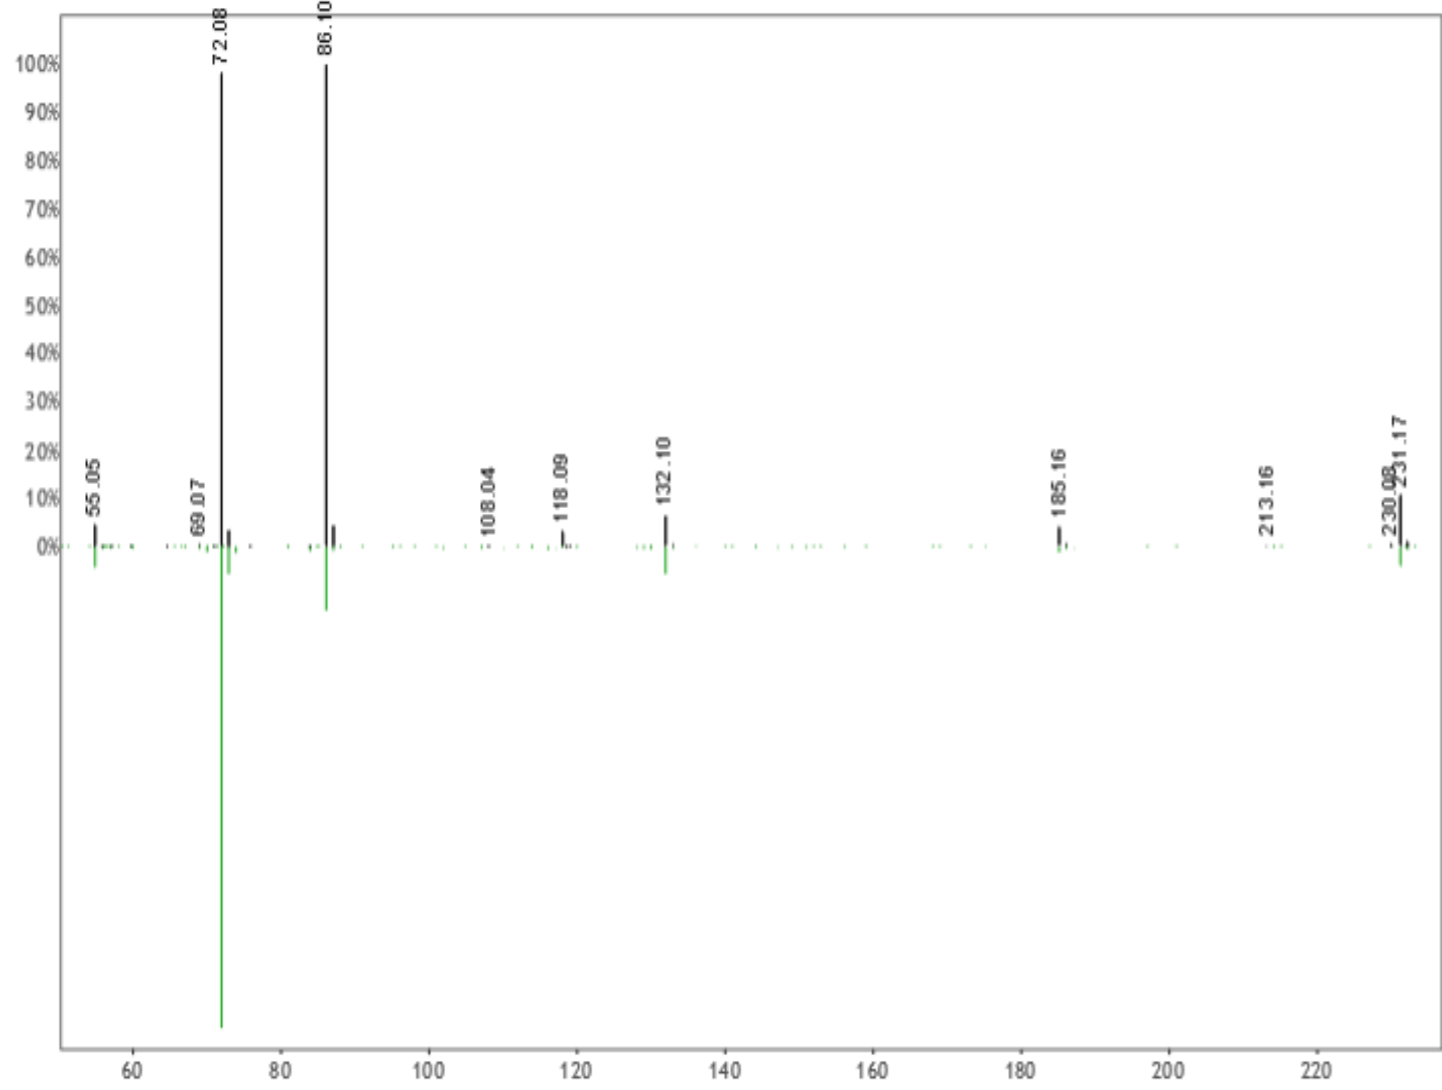**t**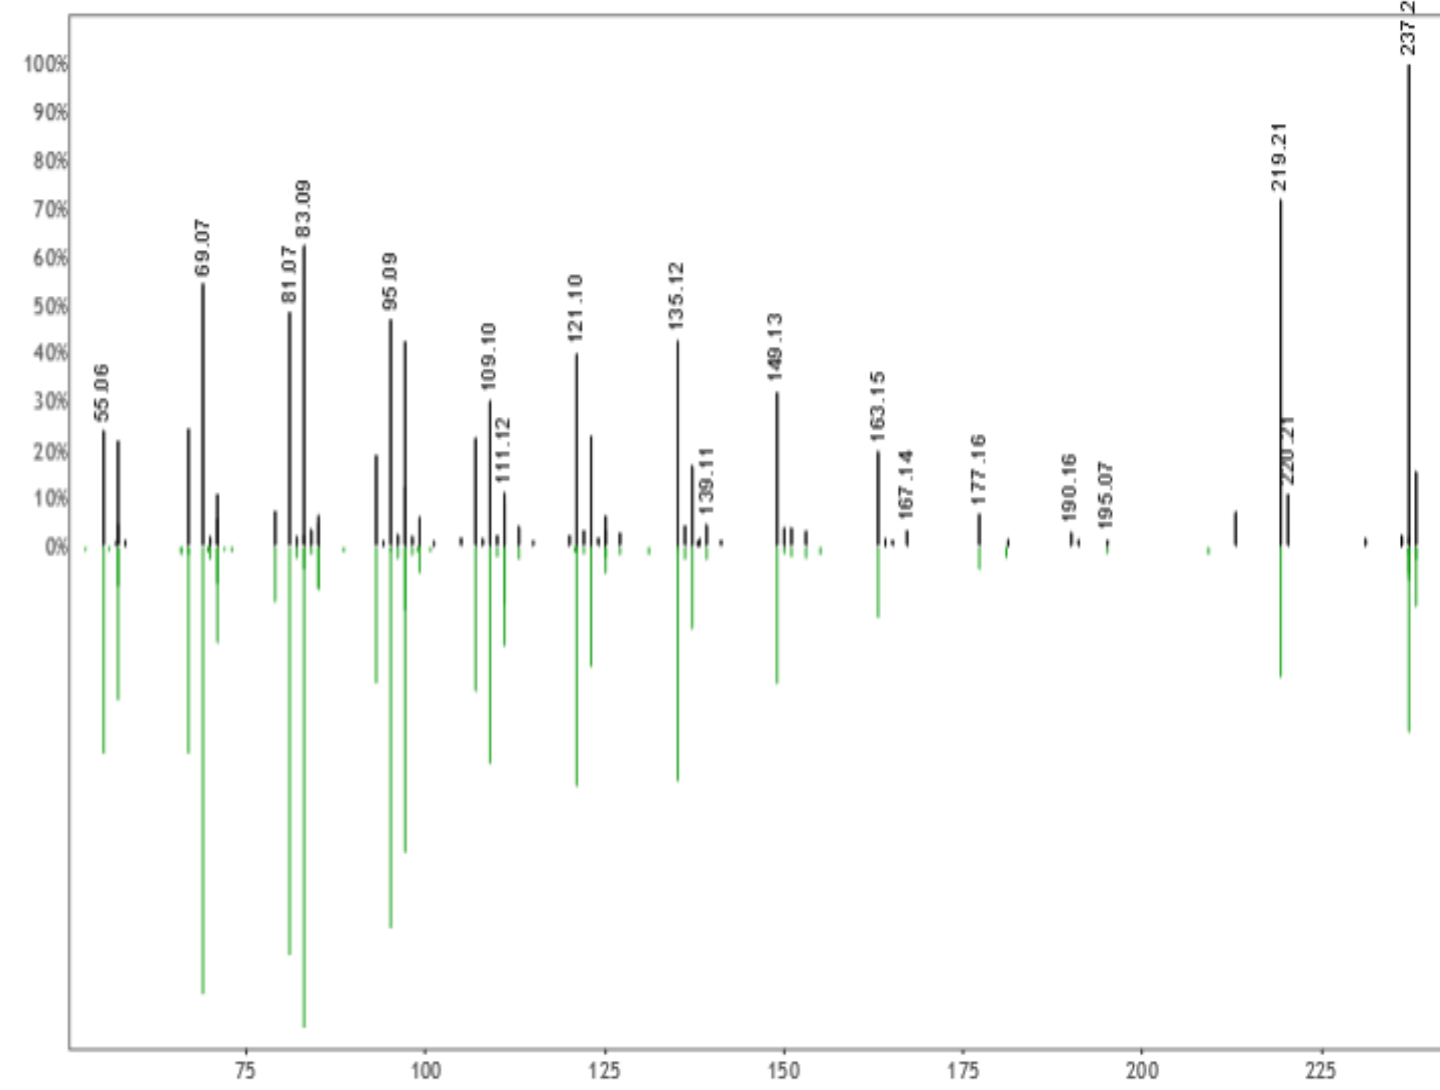

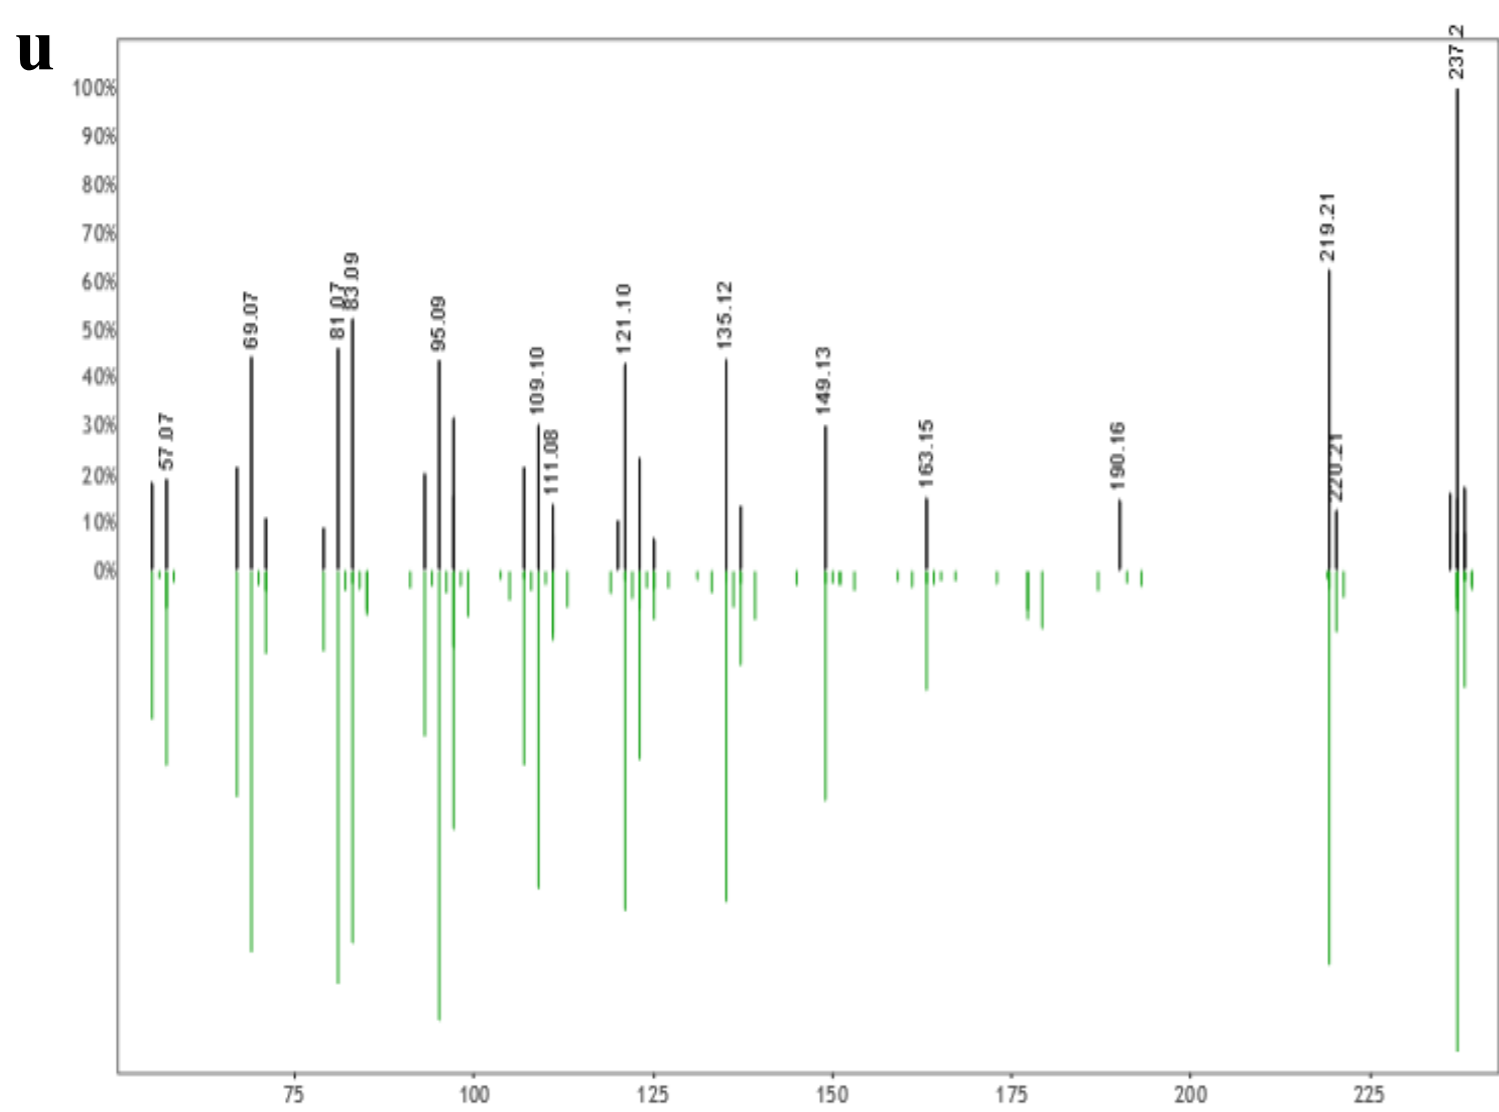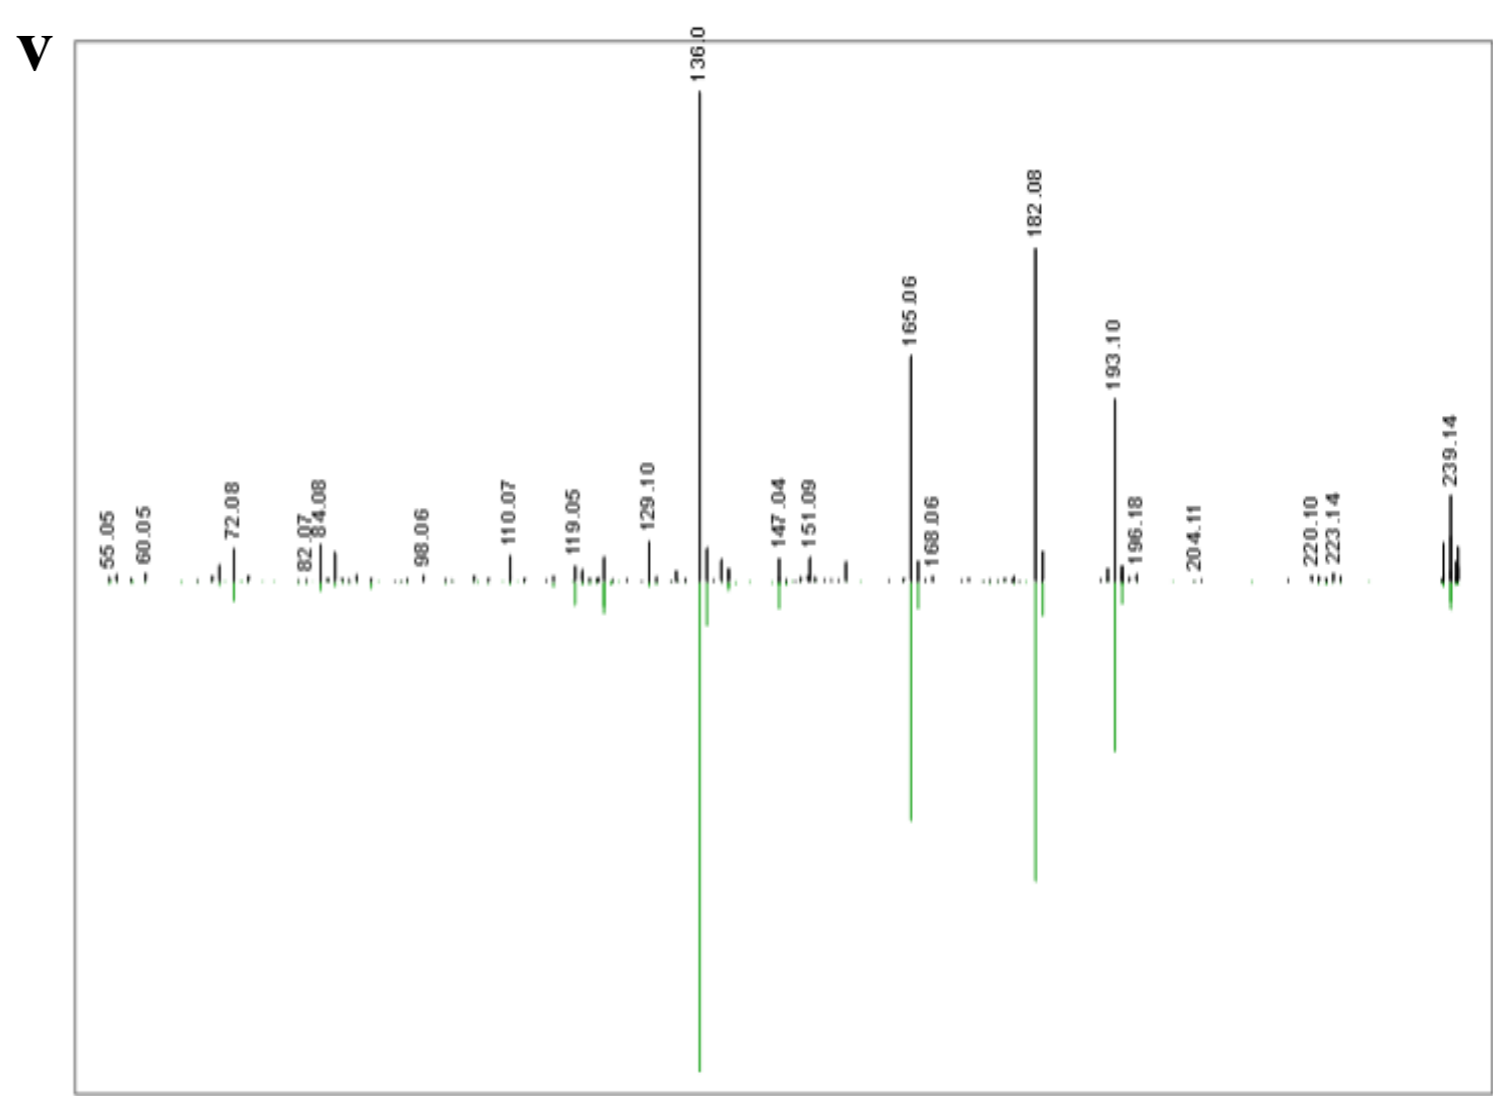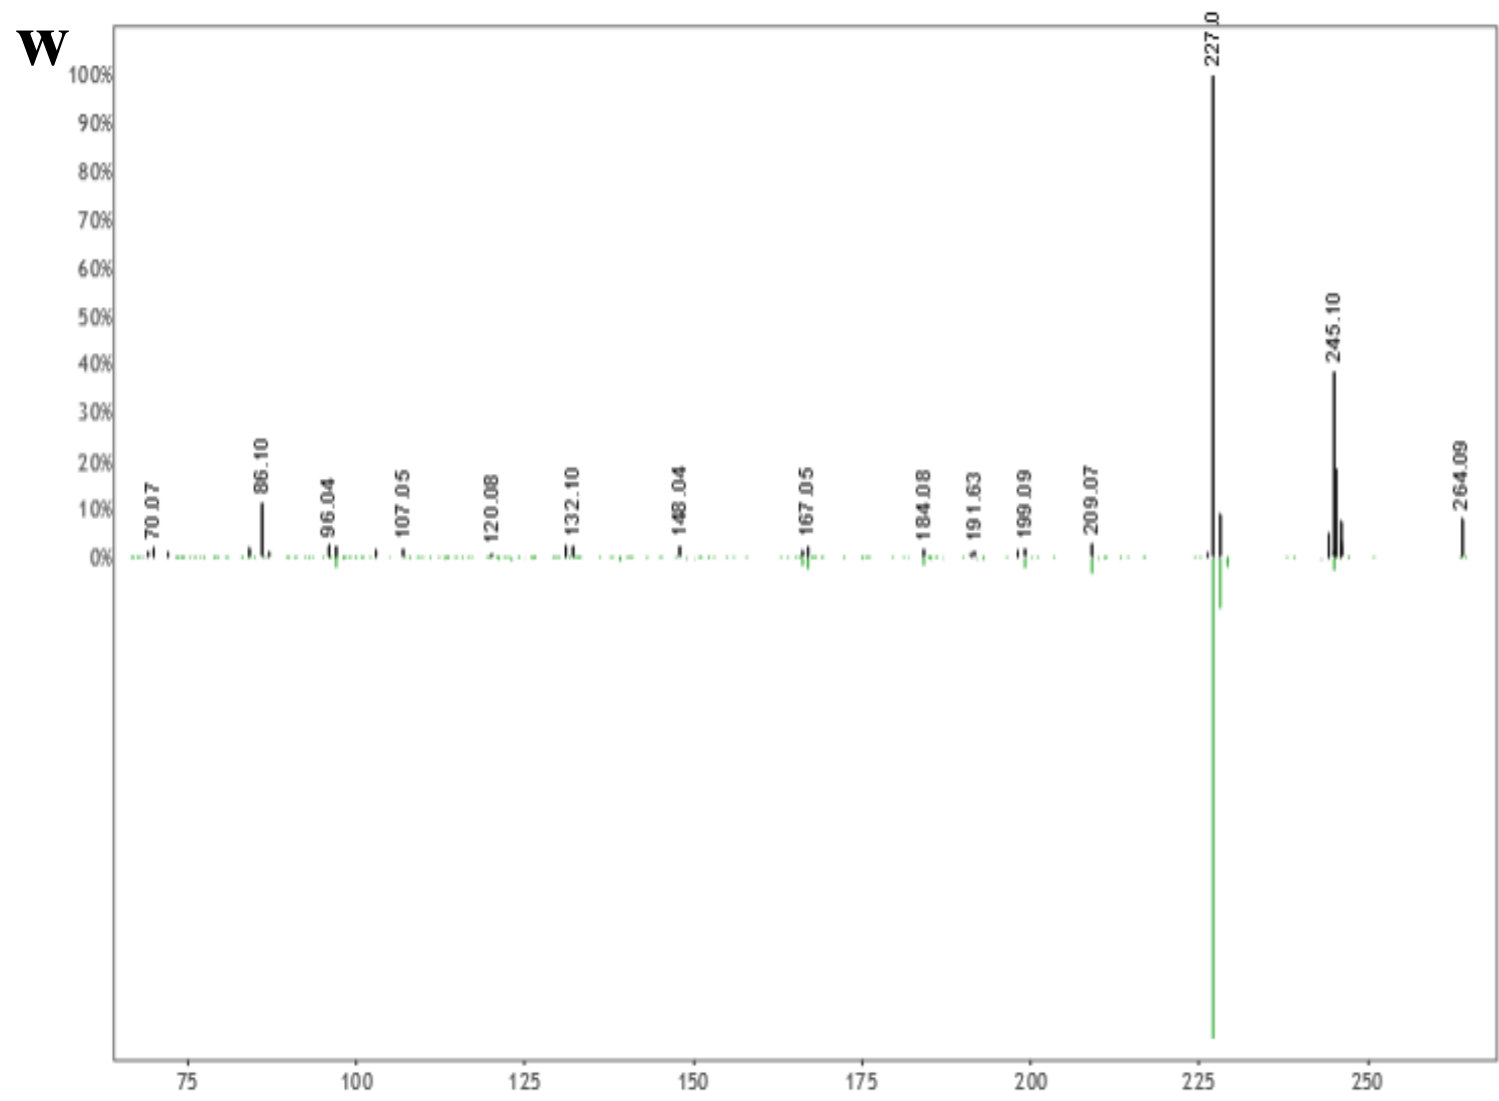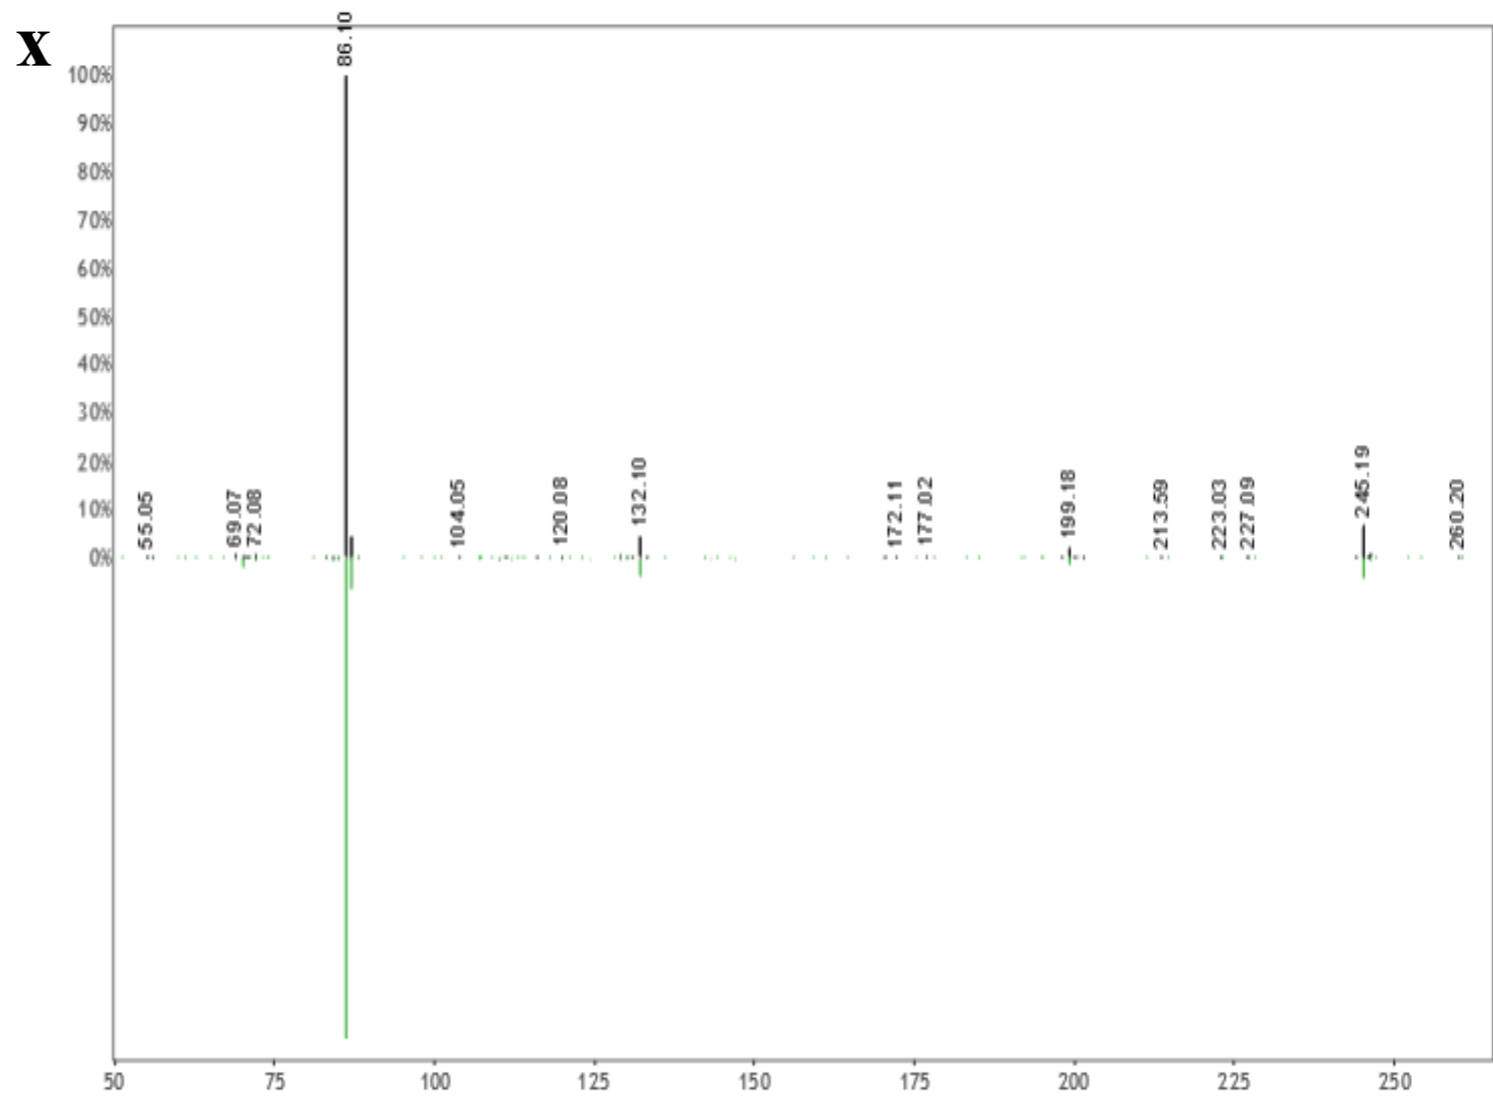

**y**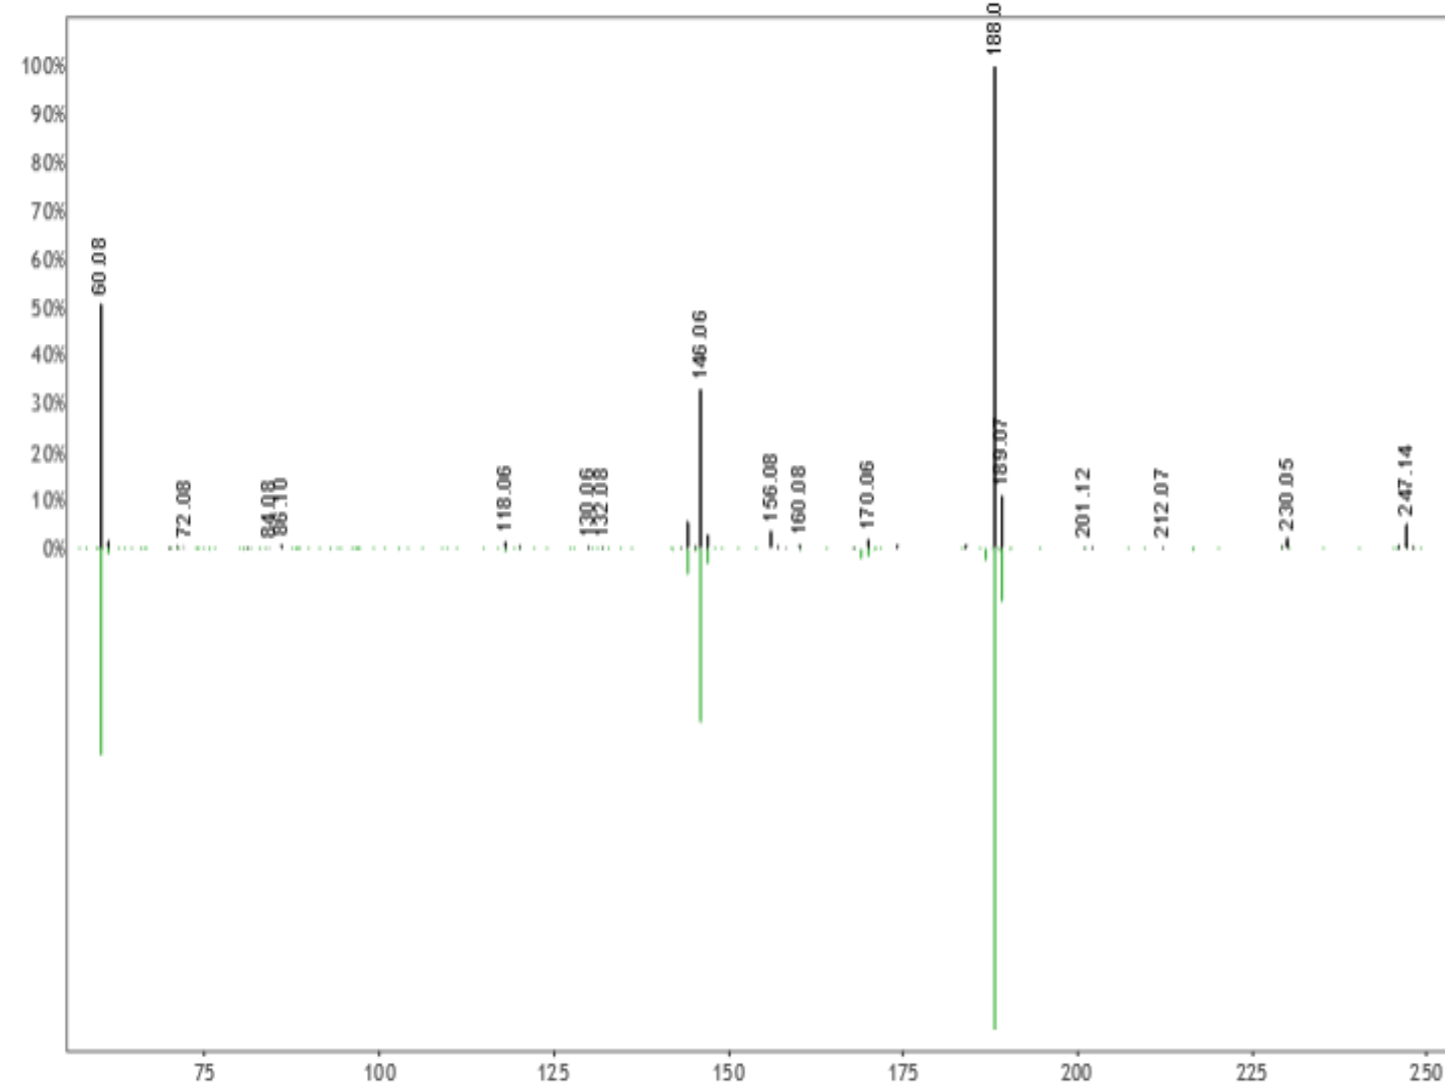**z**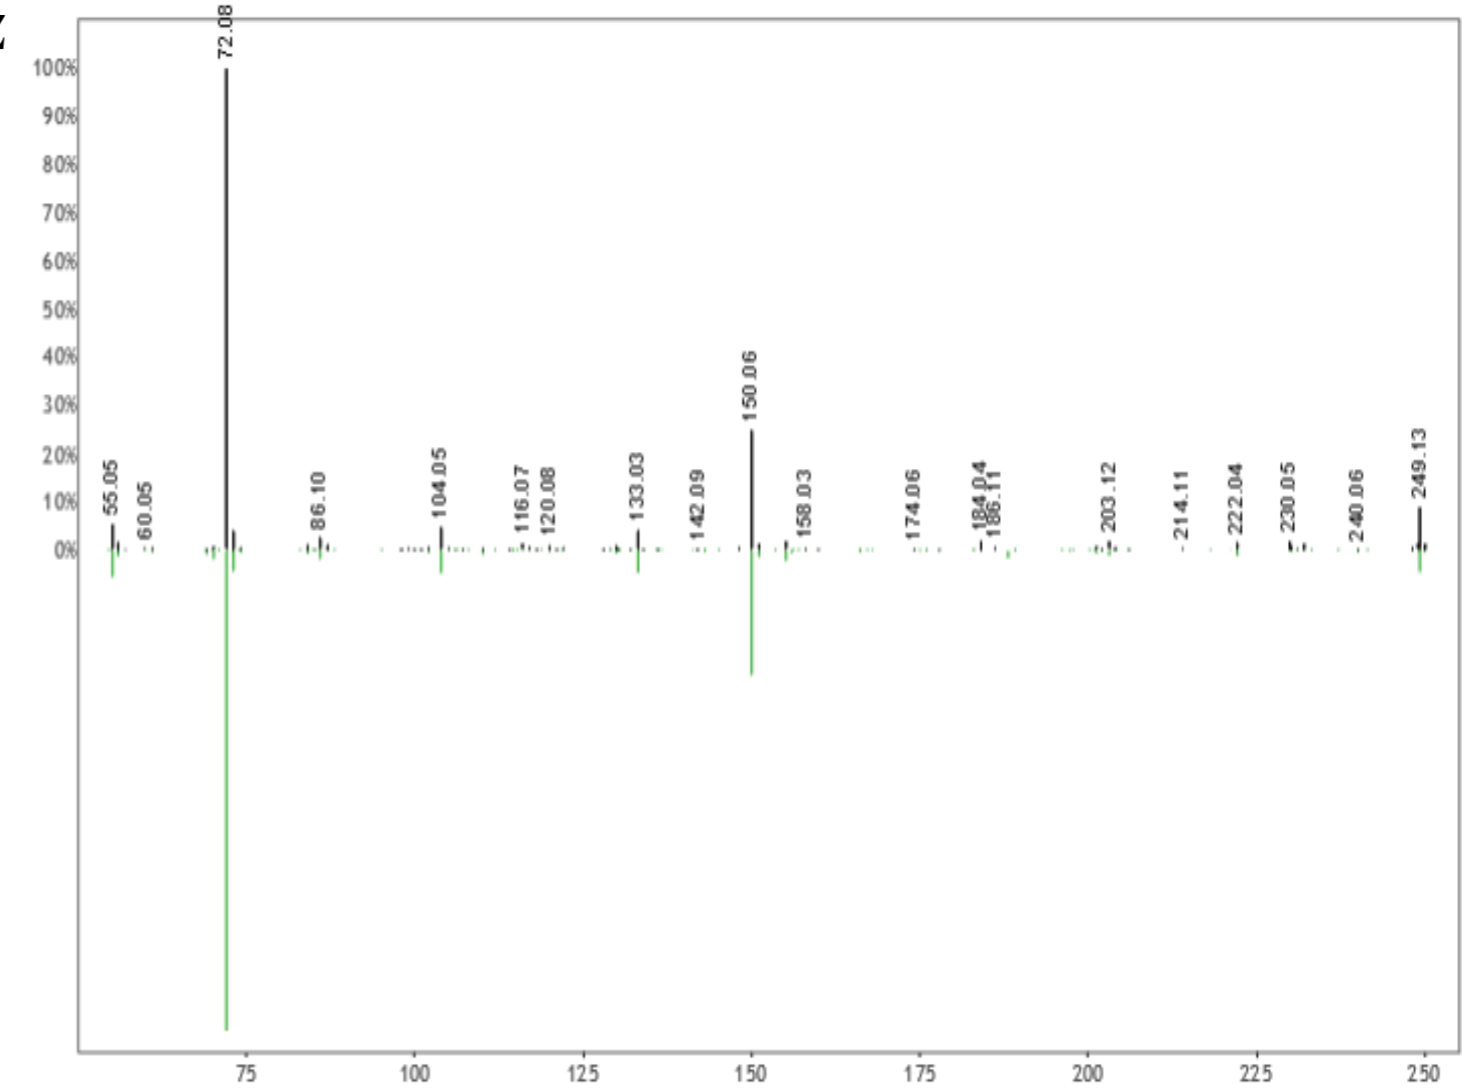**aa**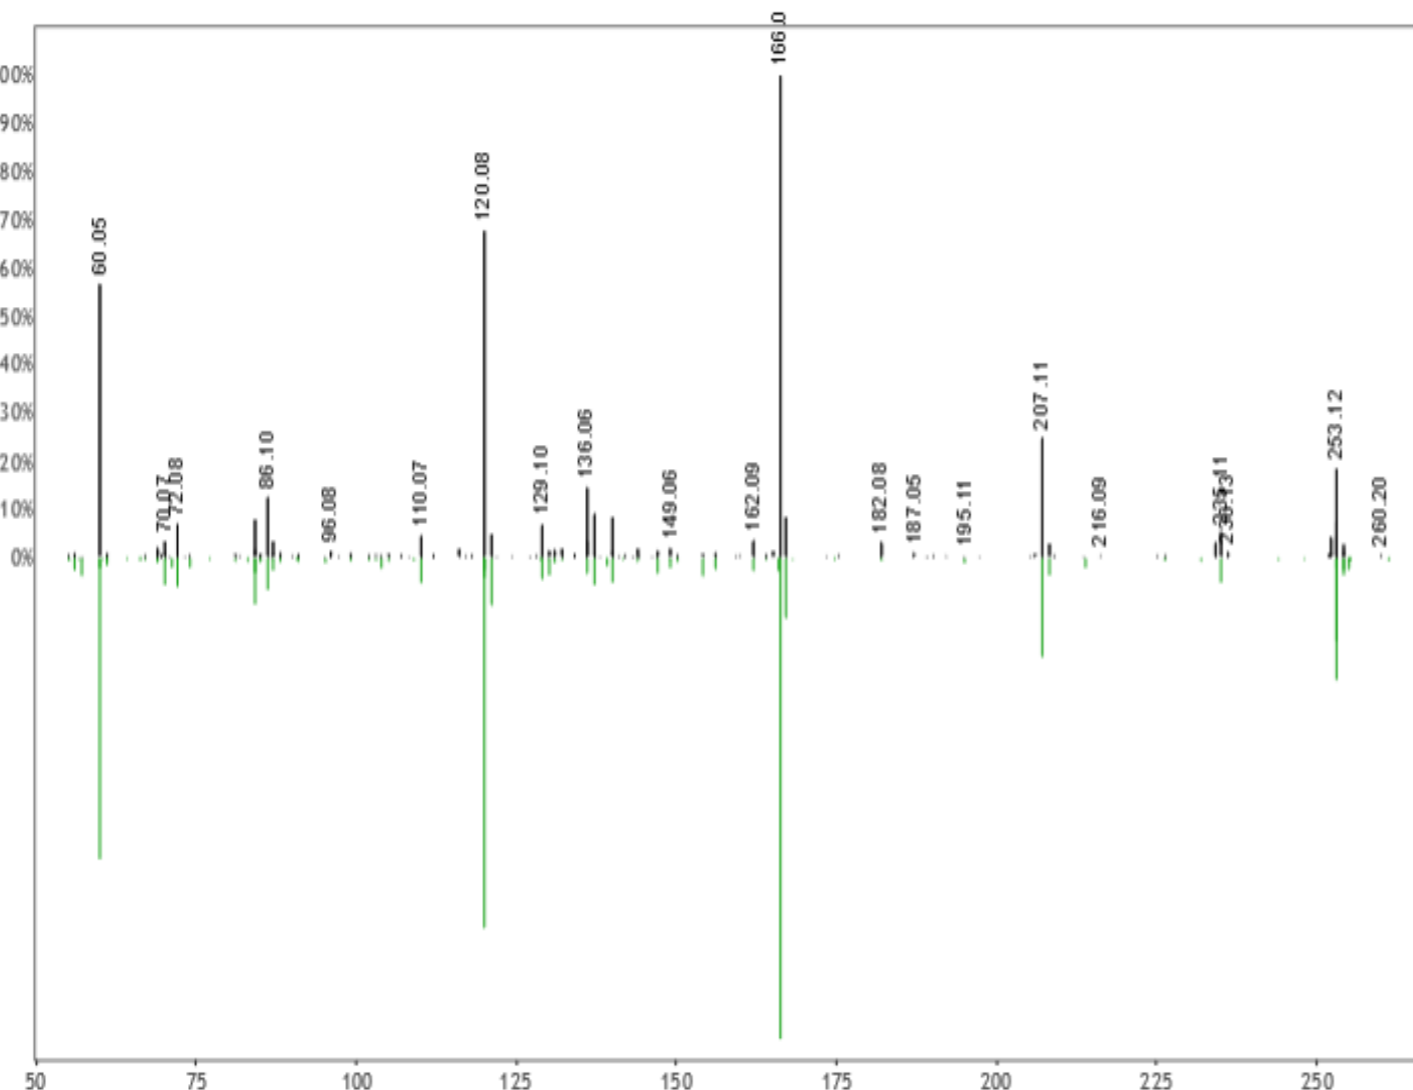**ab**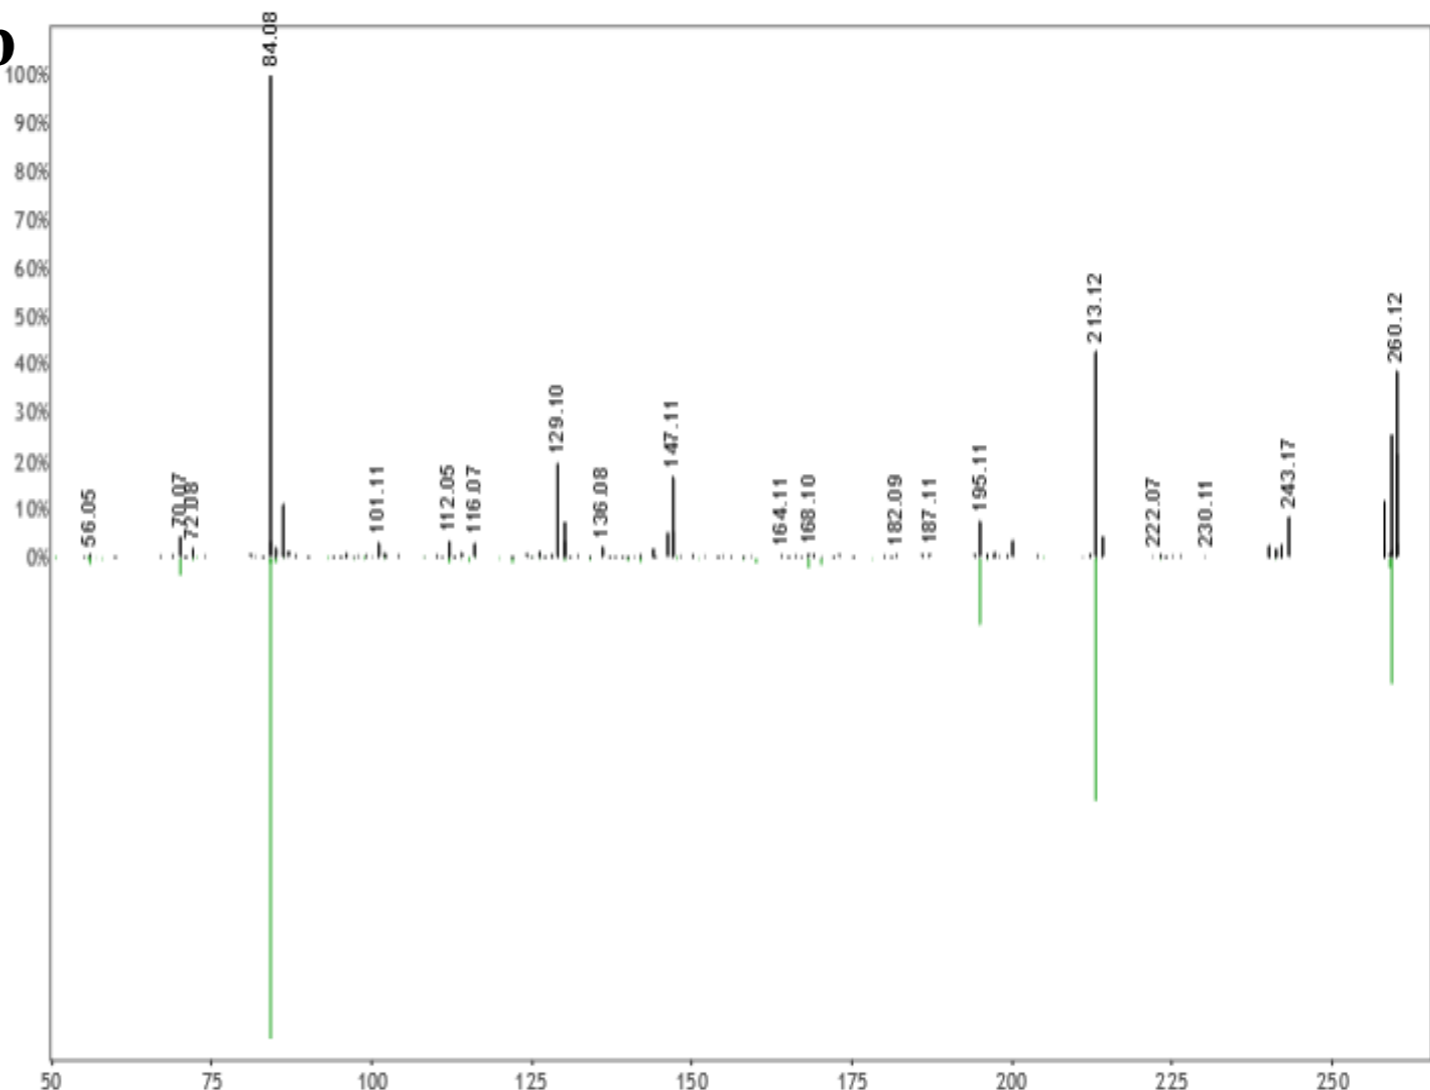

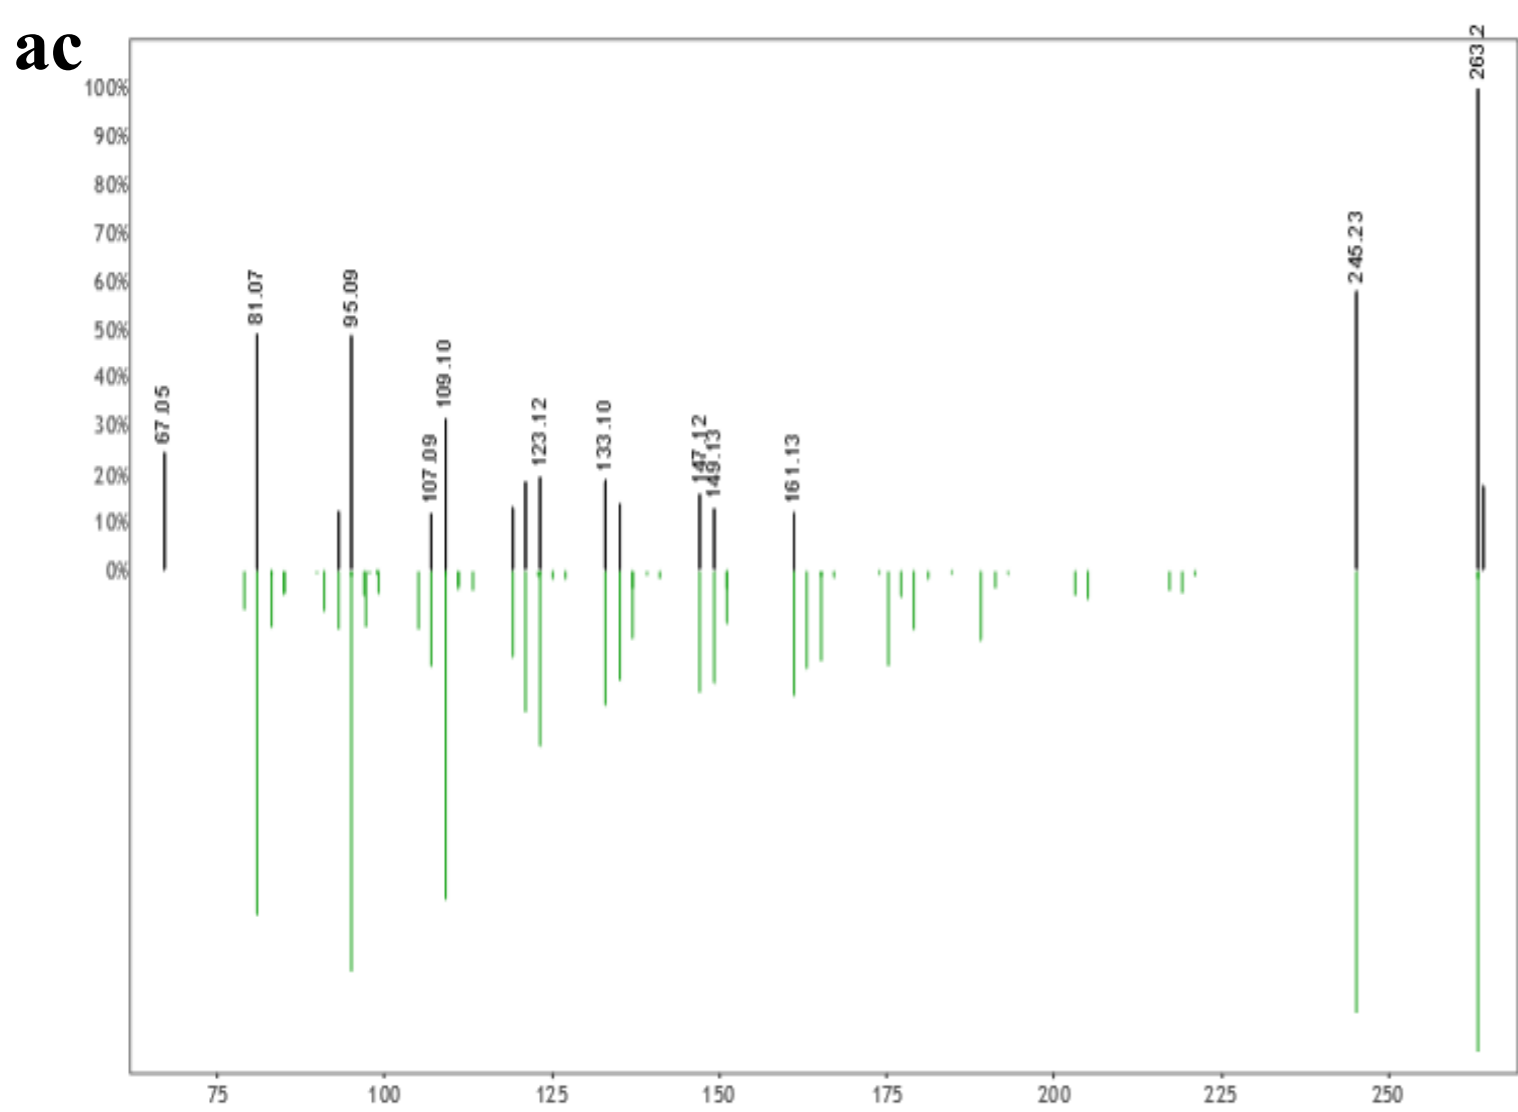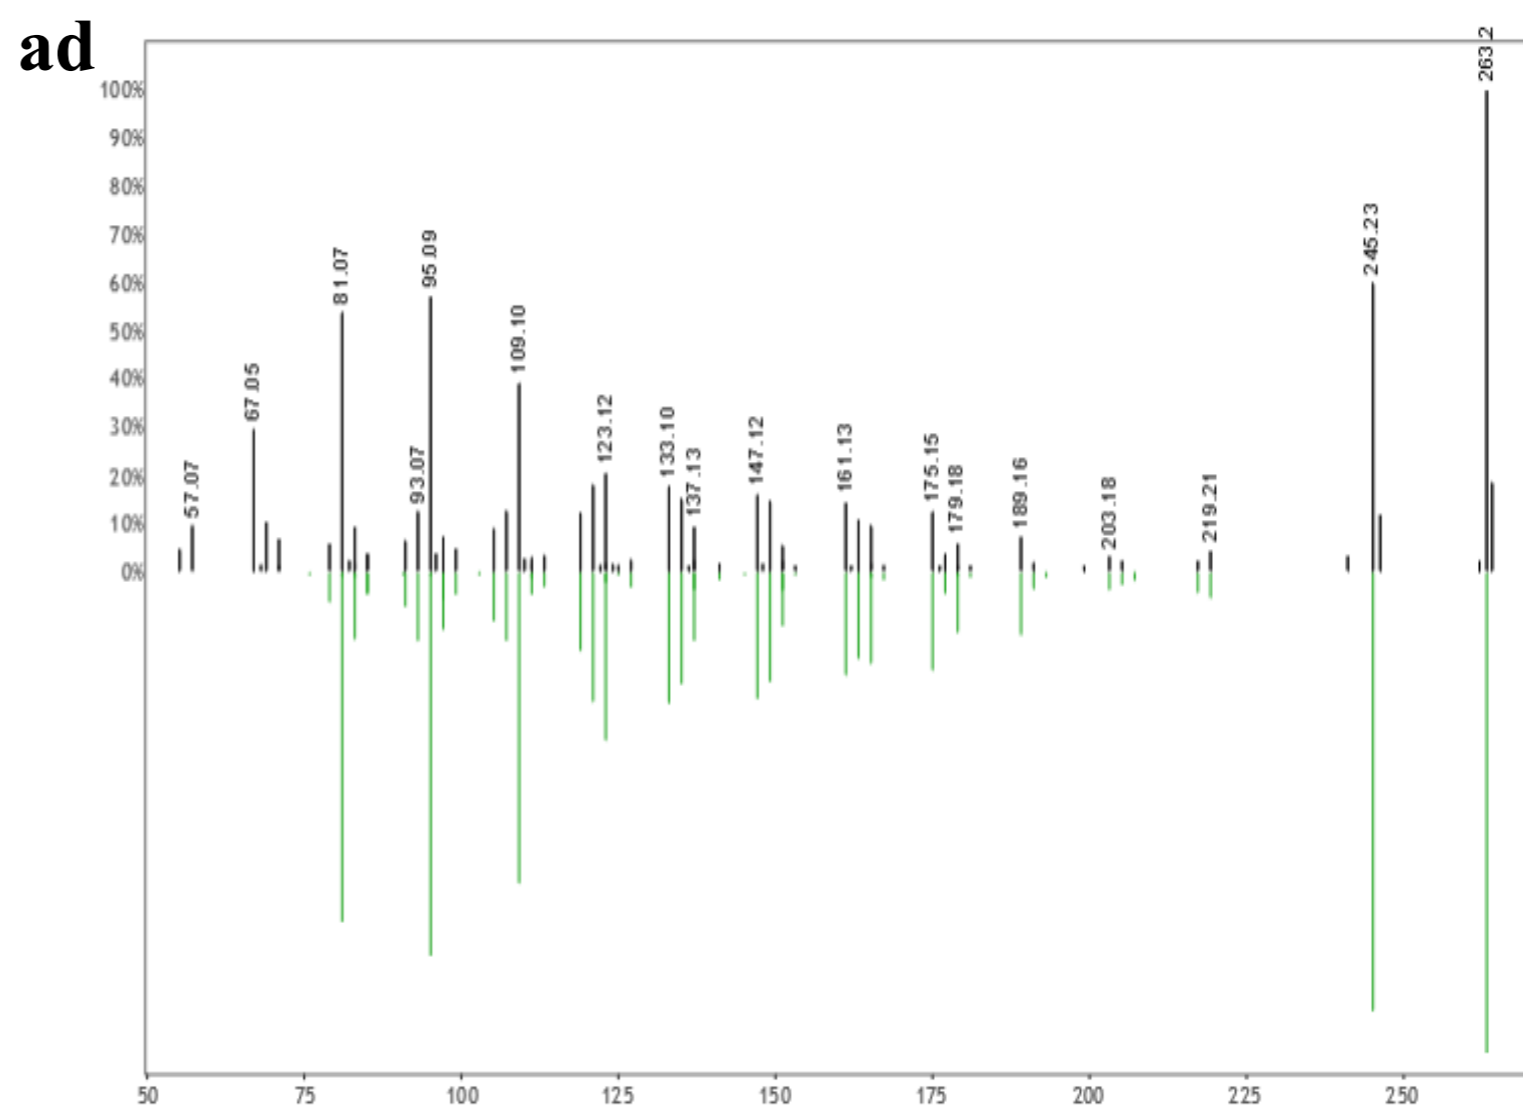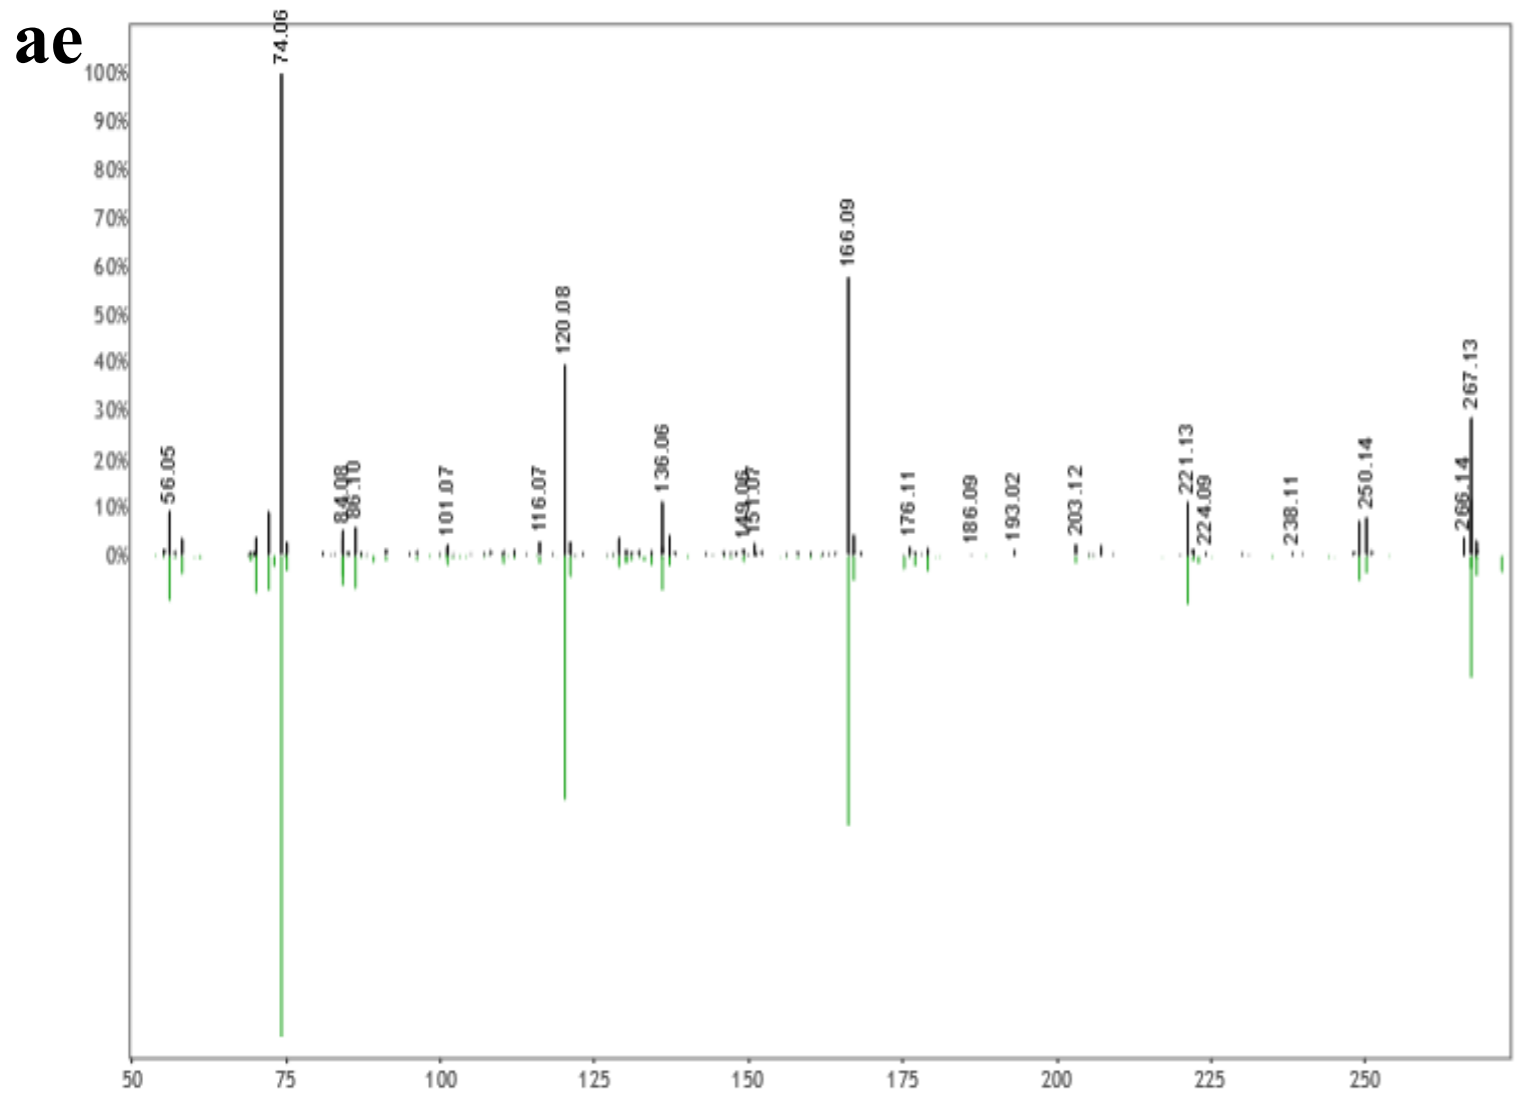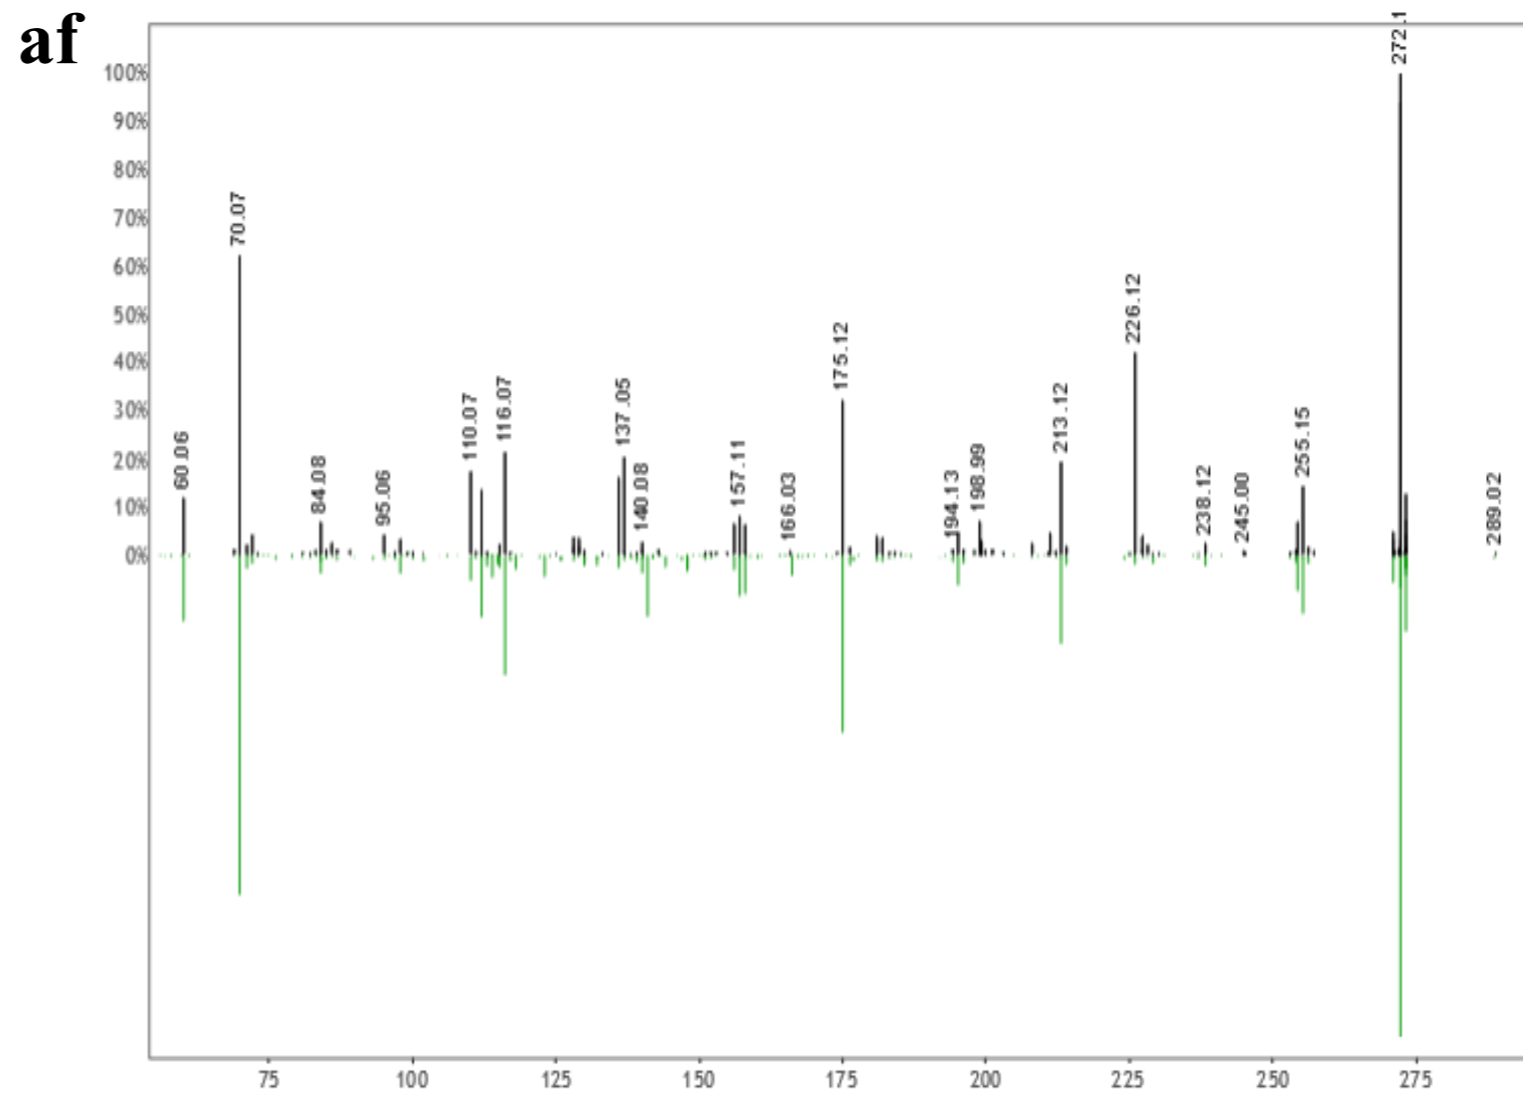



**ag**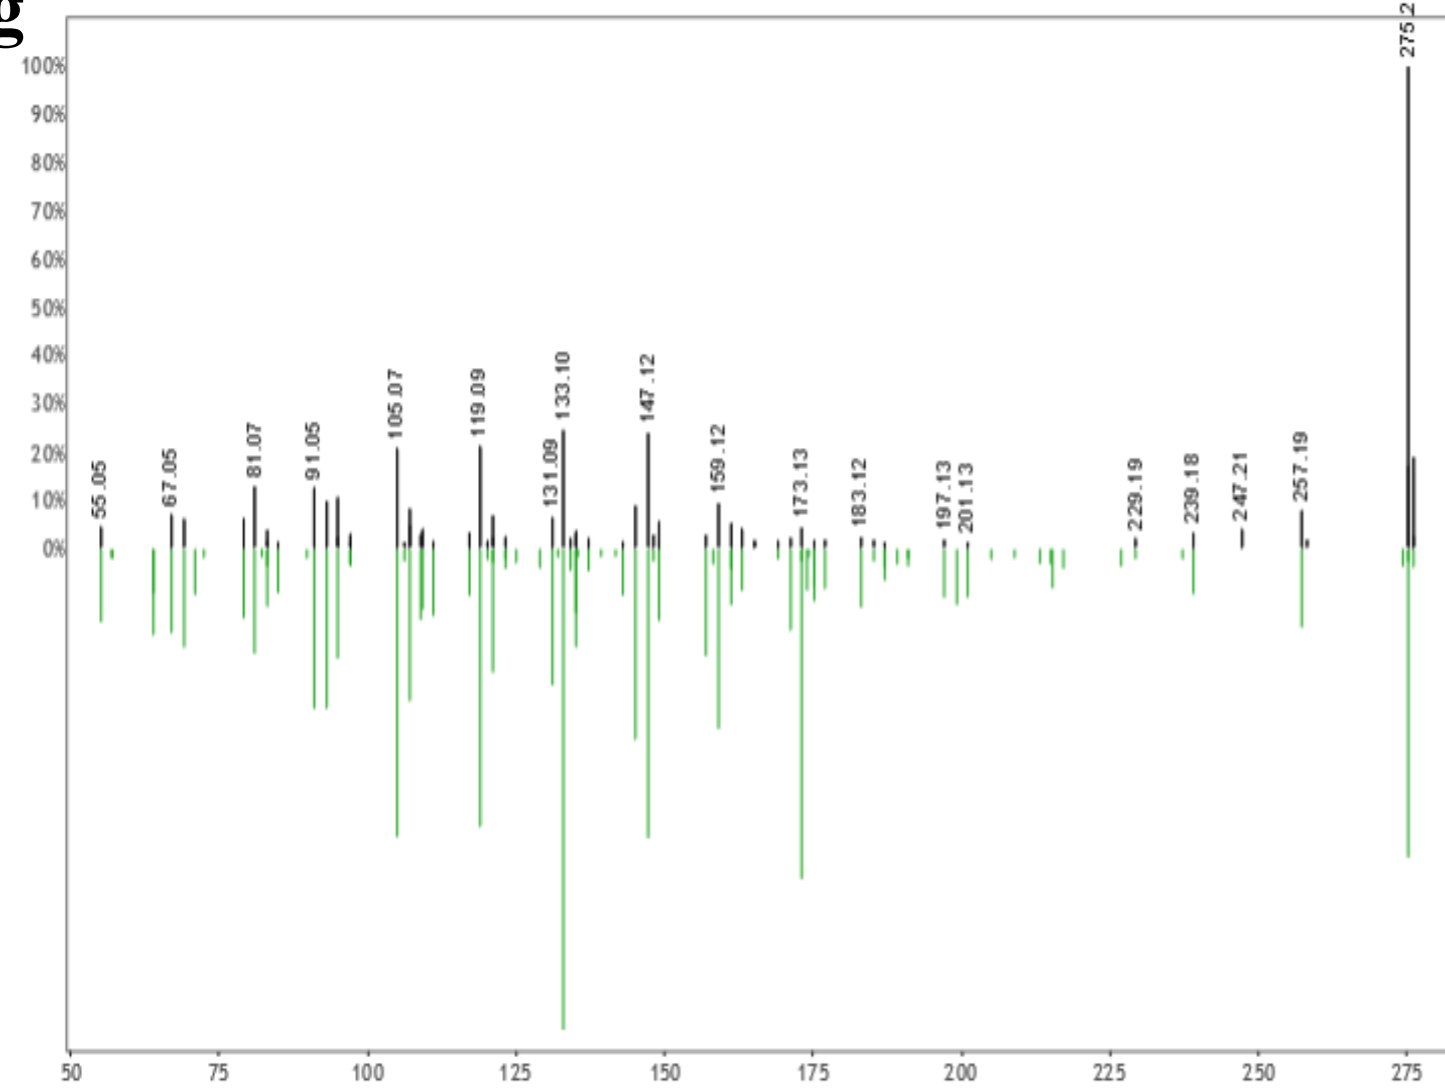**ah**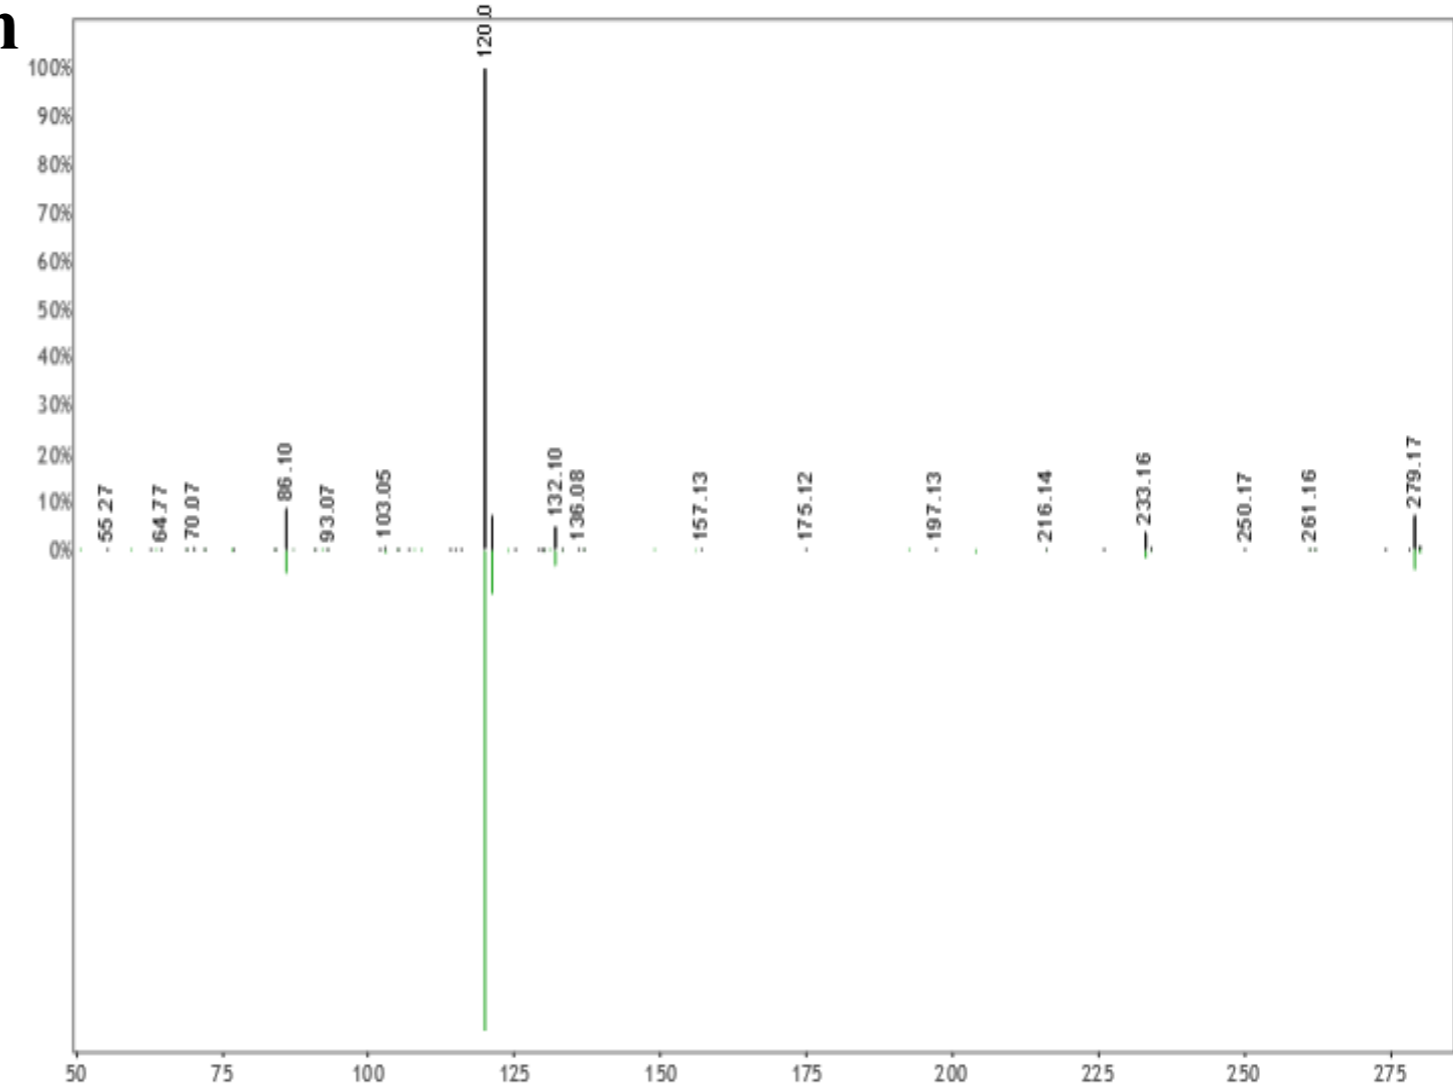**ai**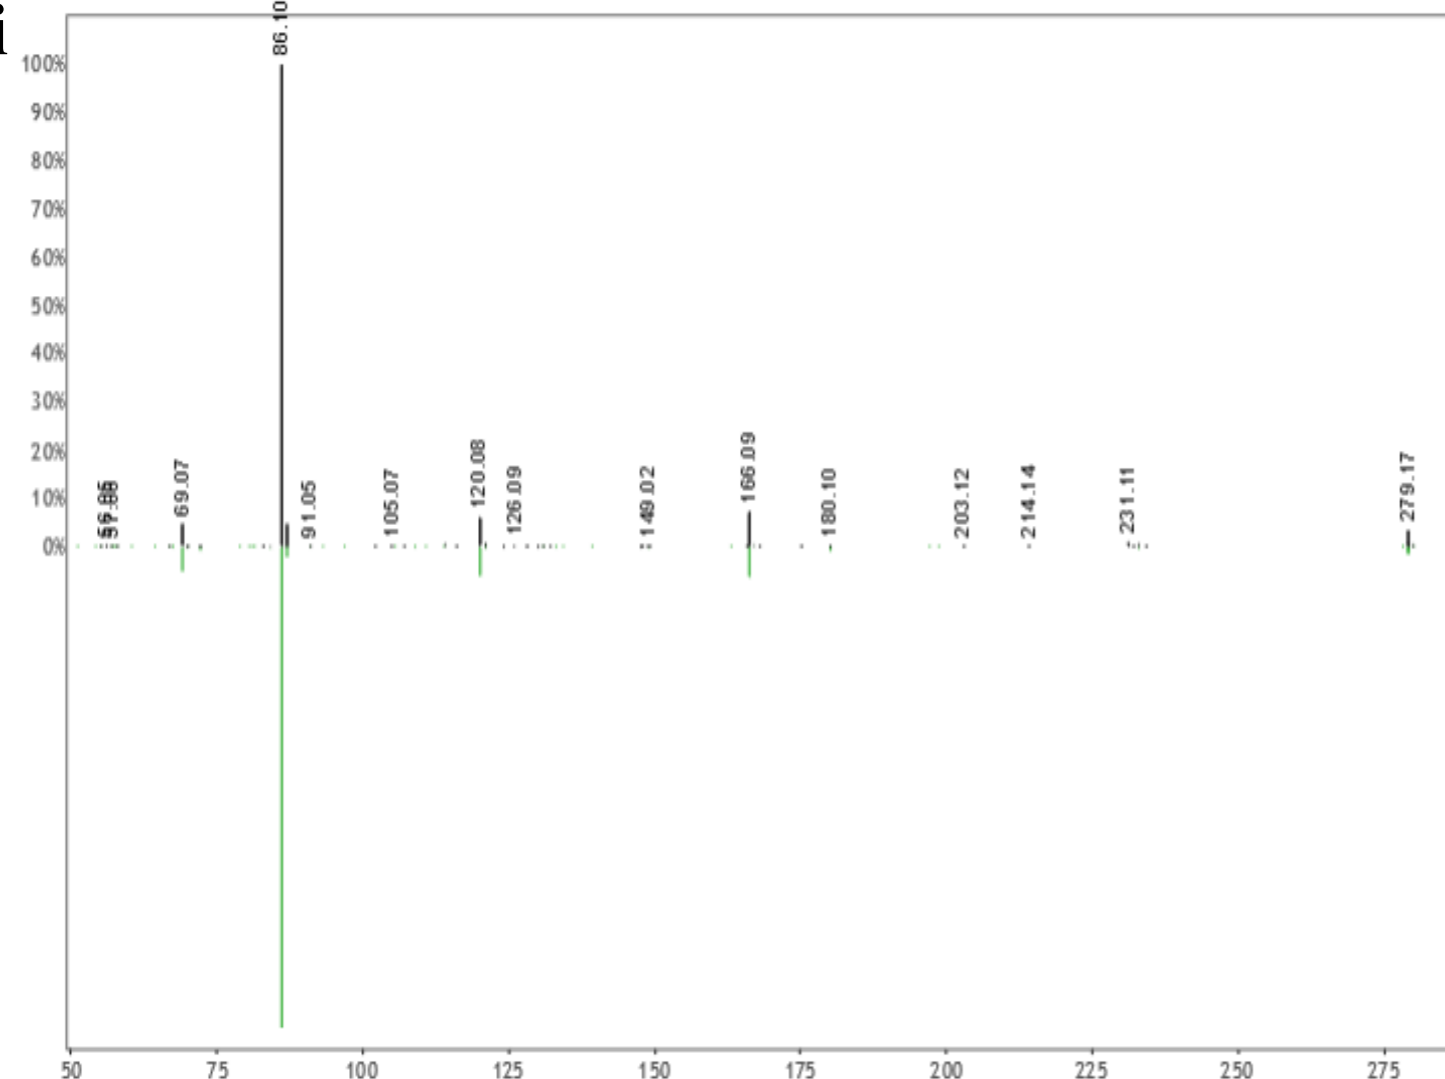**aj**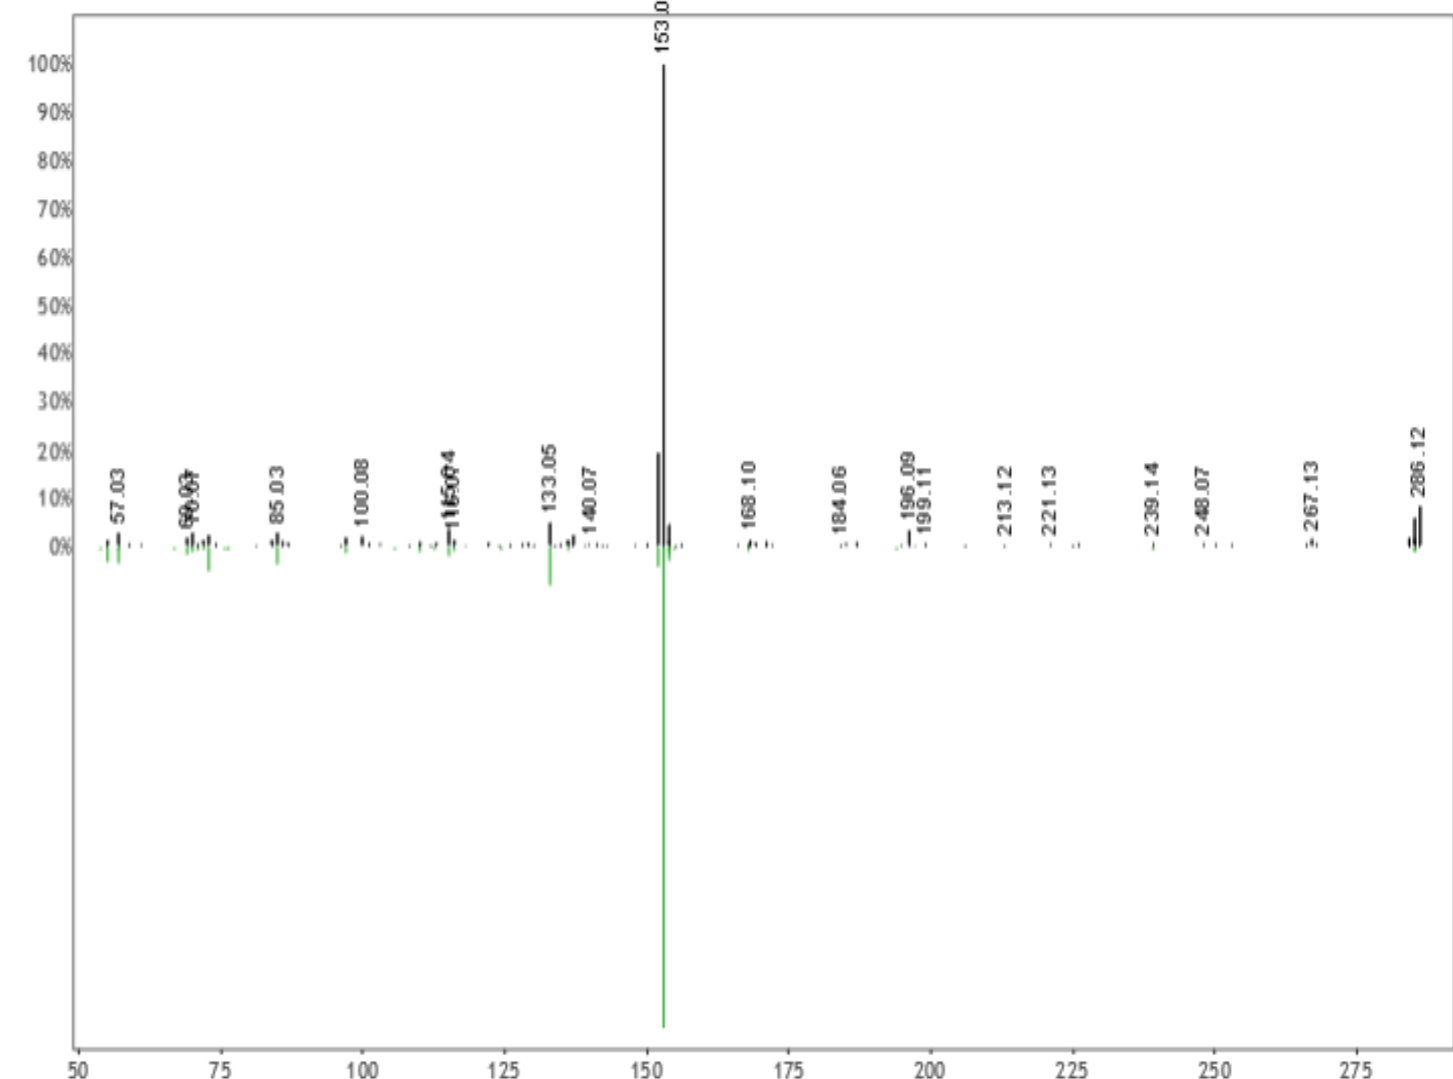

**ak**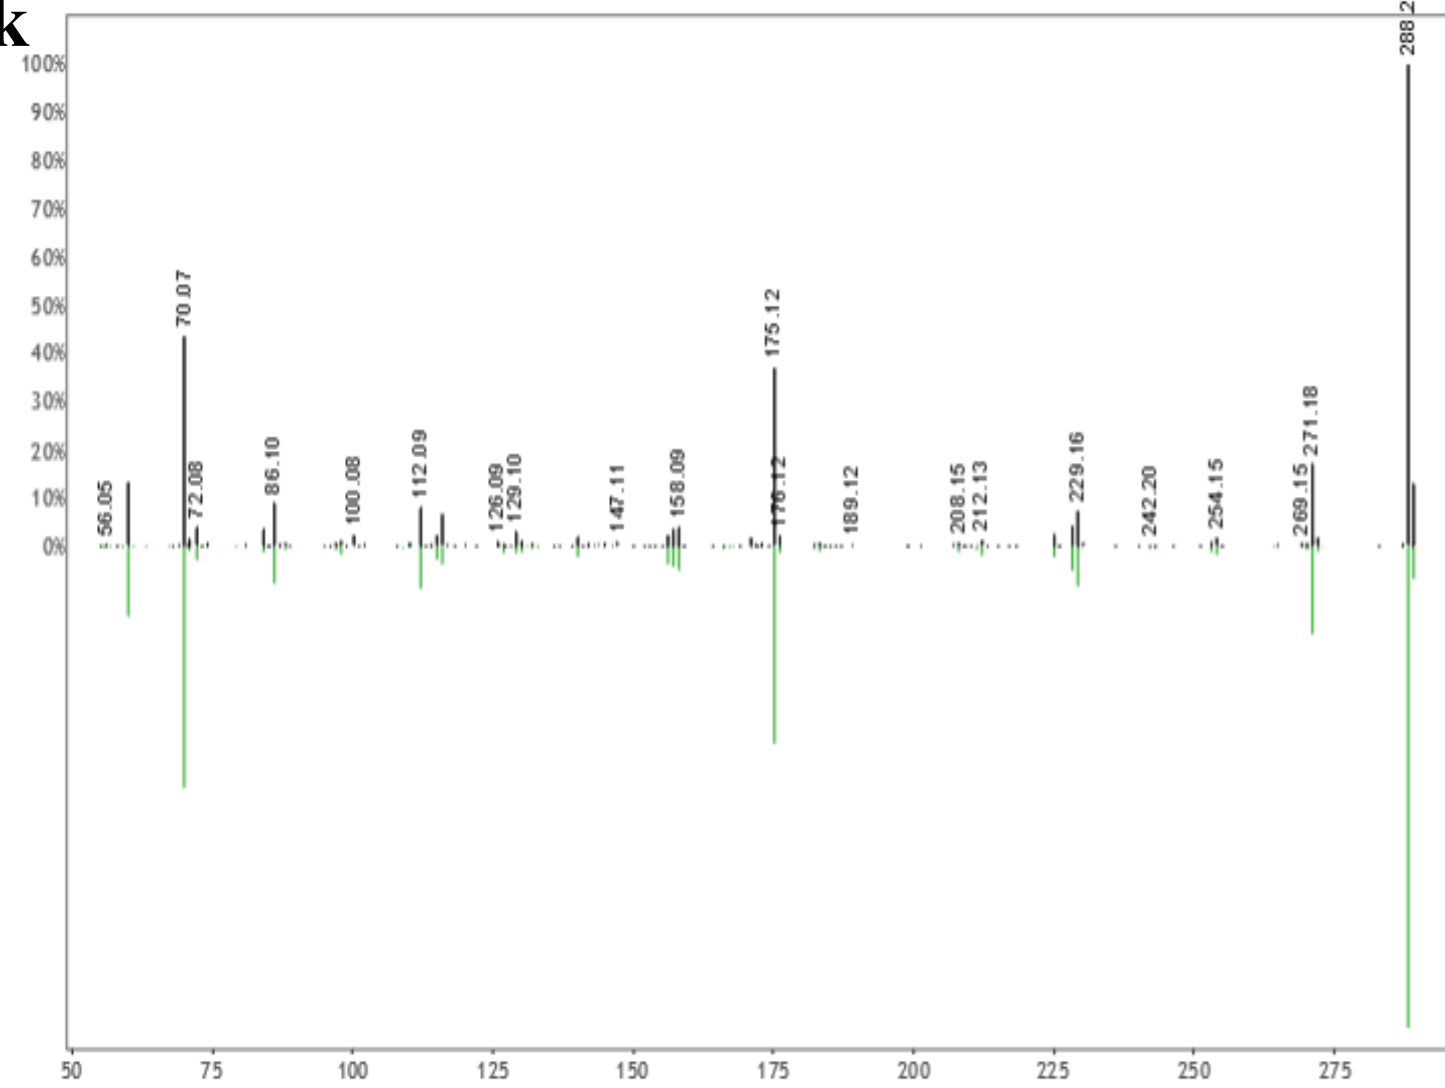**al**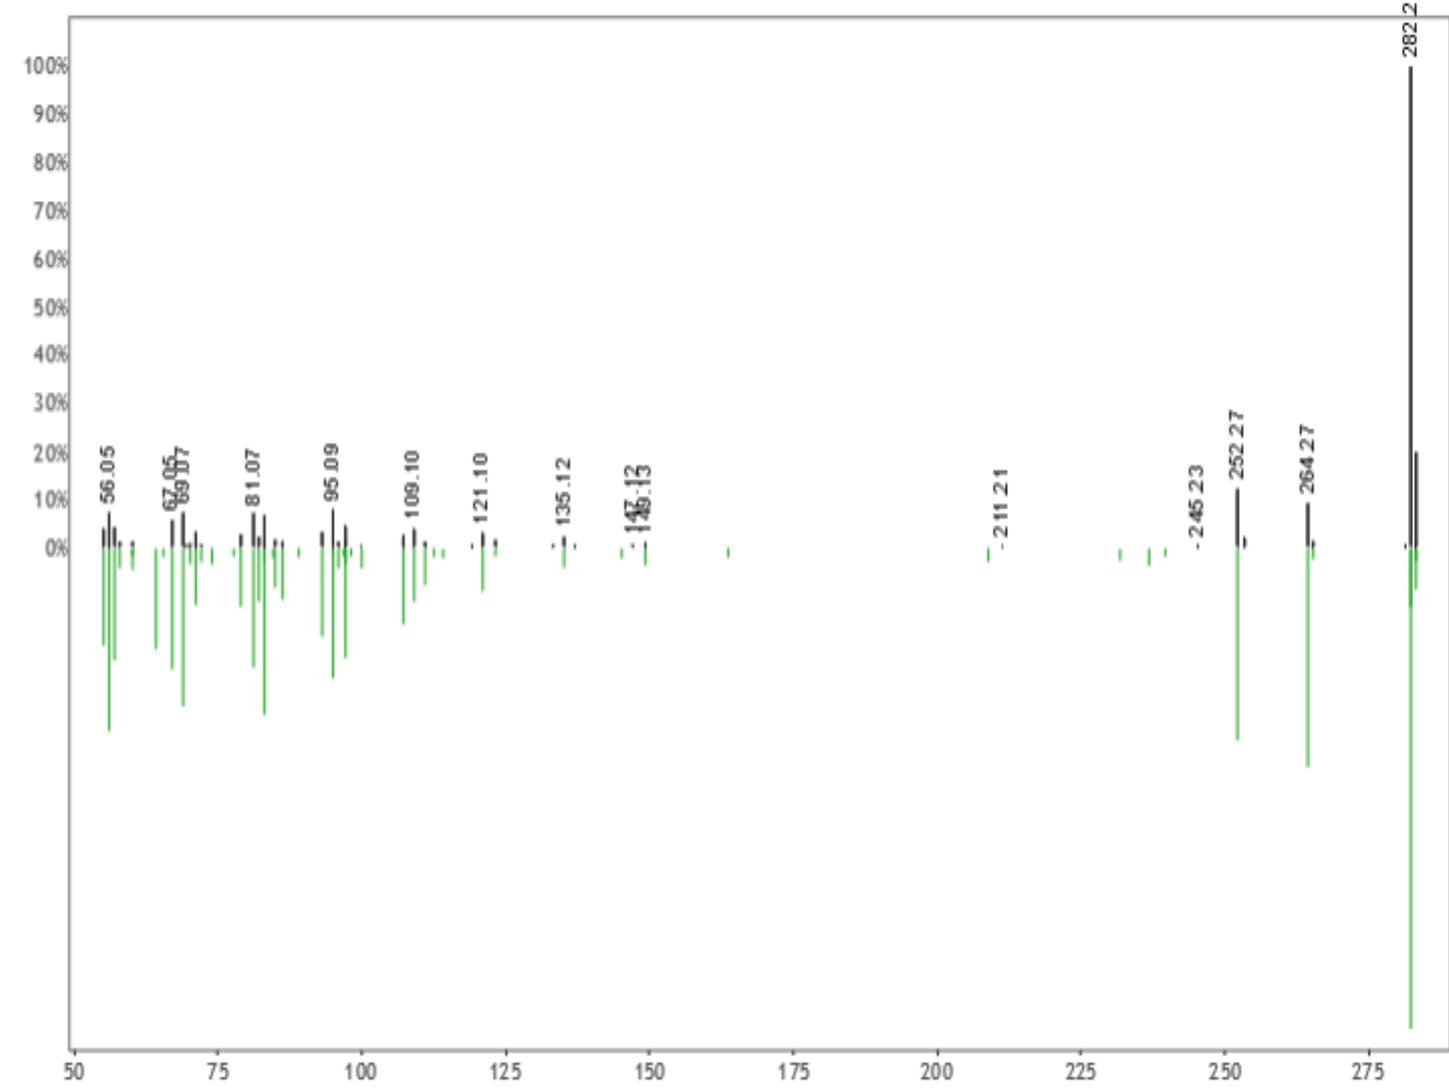**am**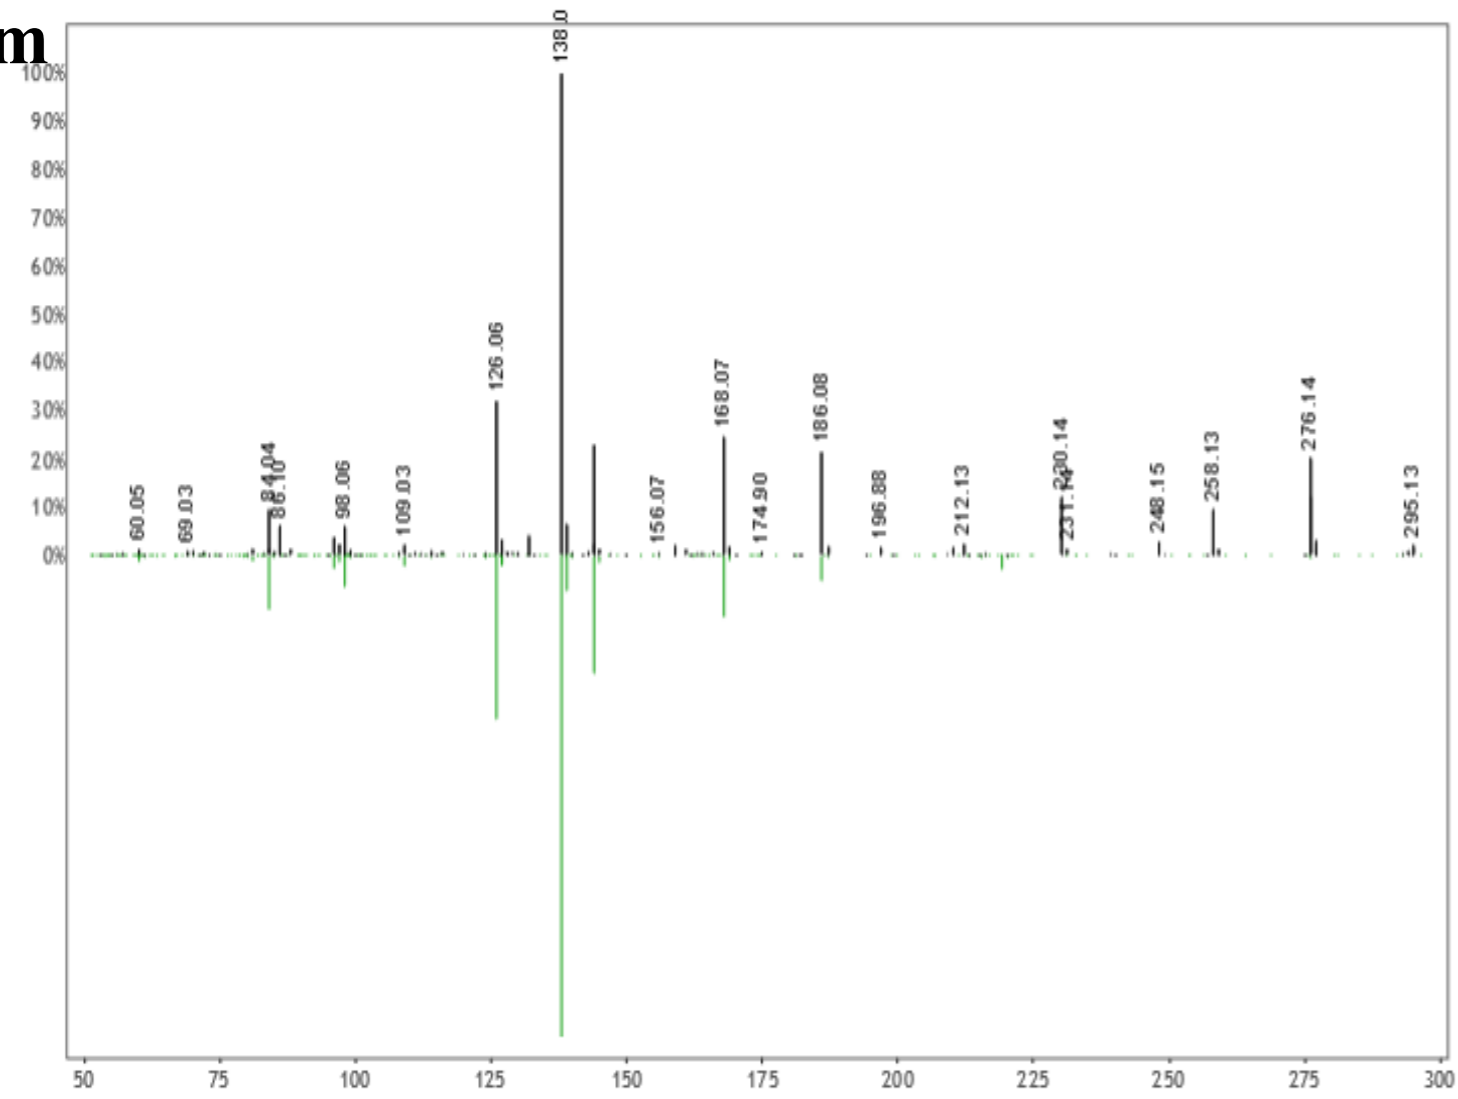**an**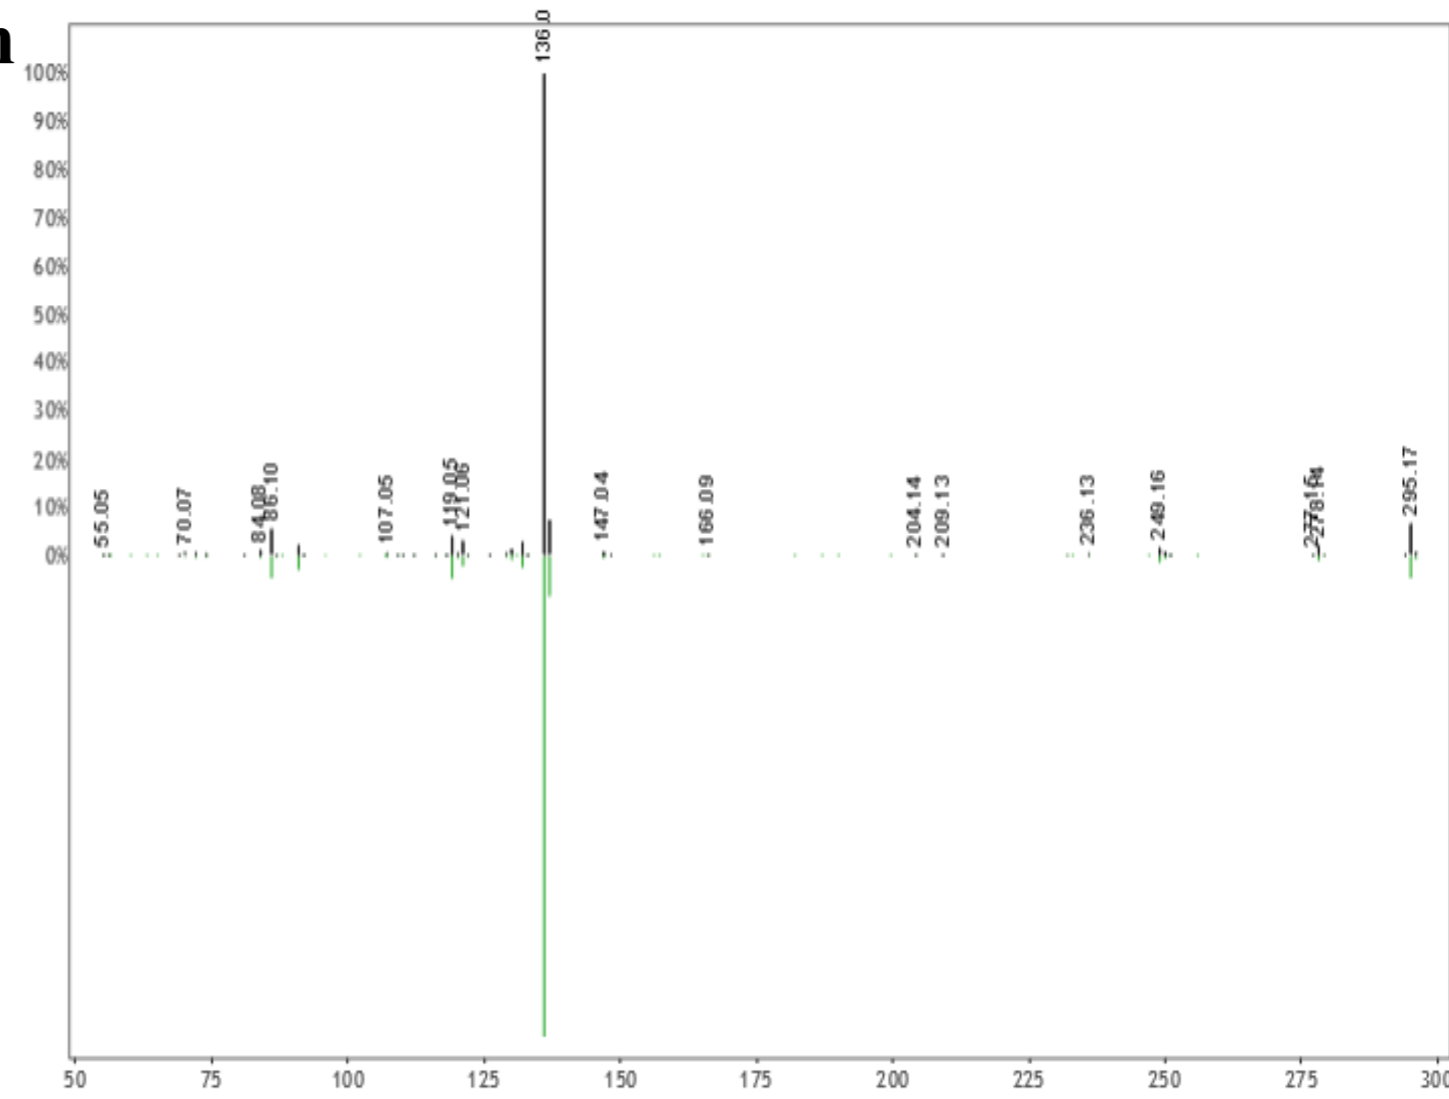

**ao**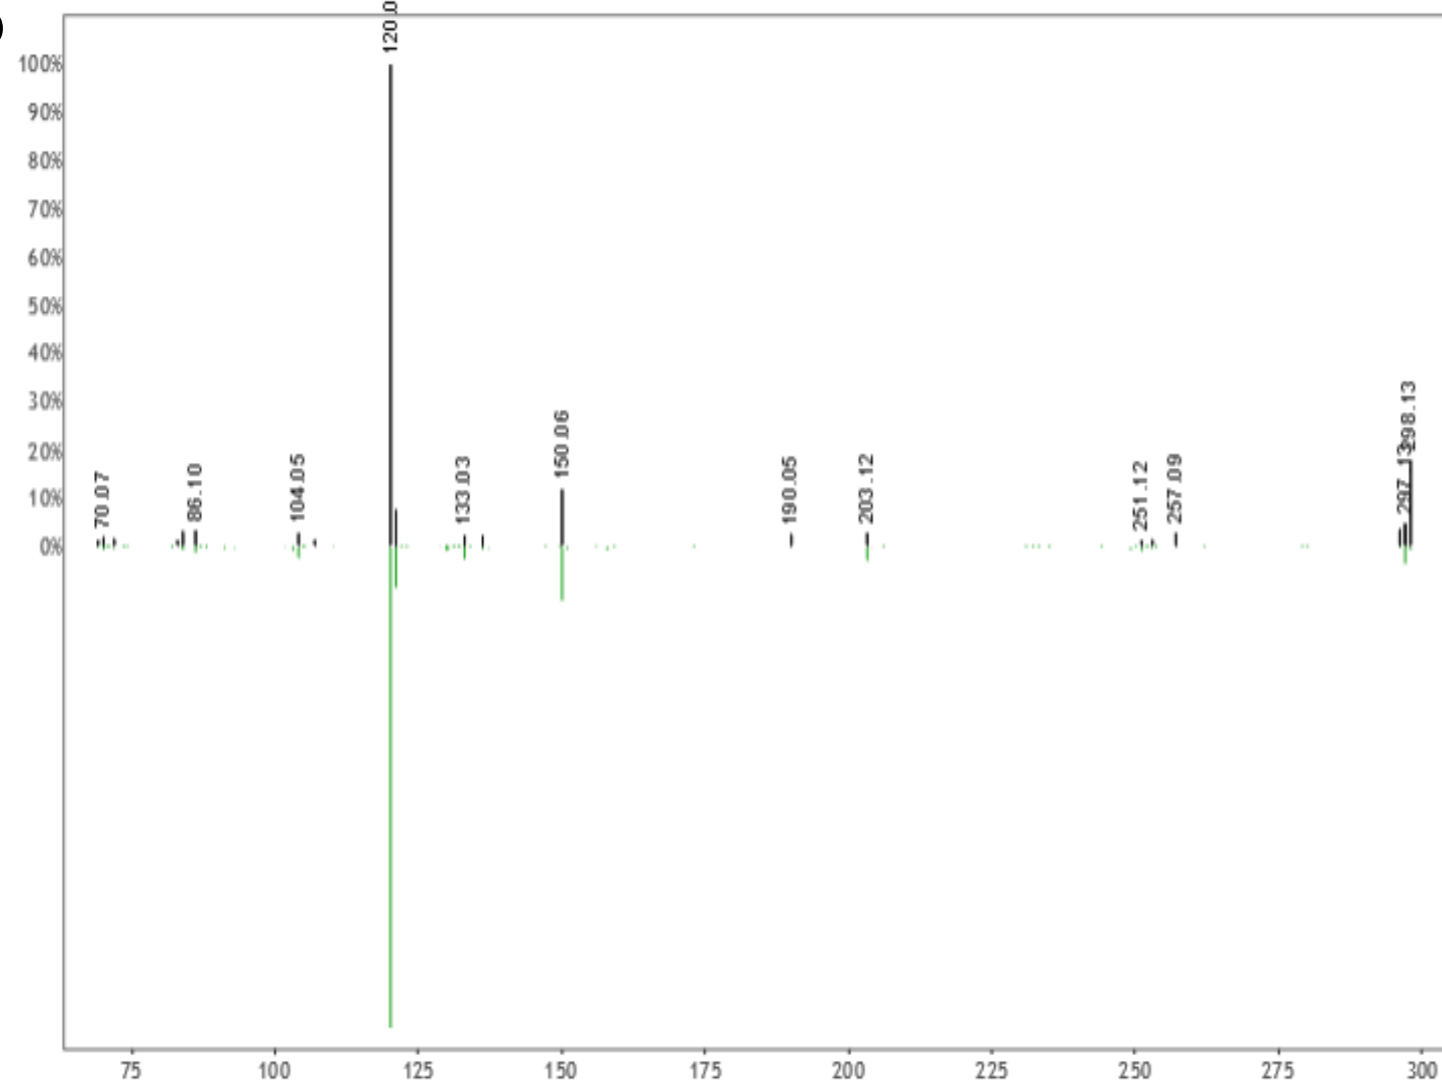**ap**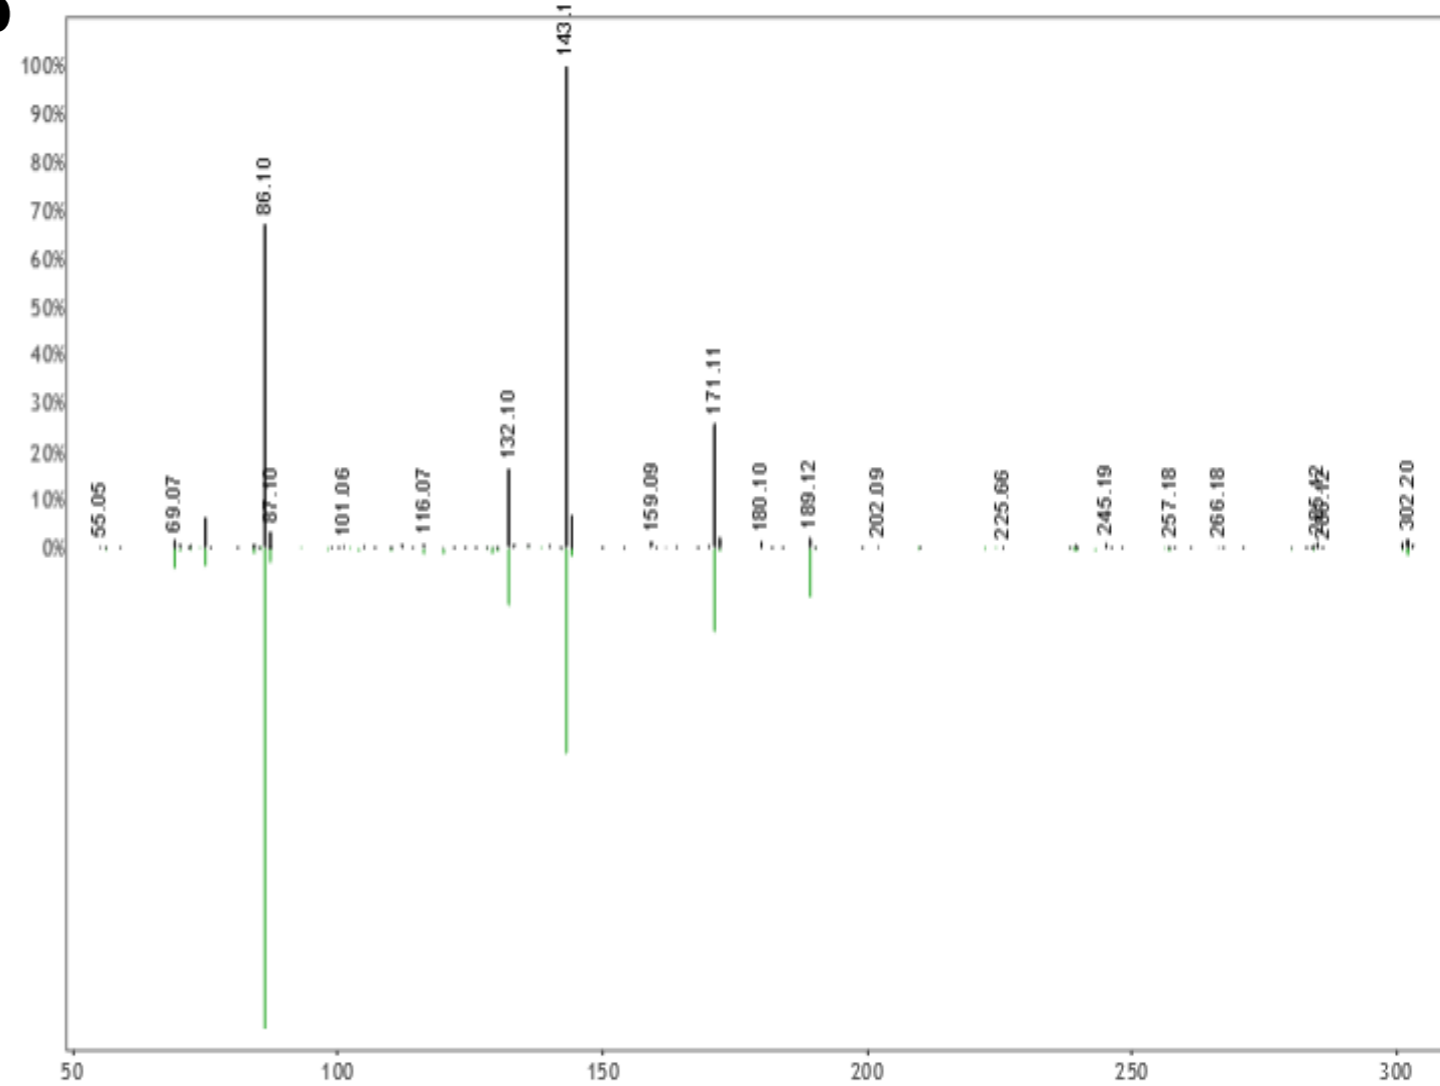**aq**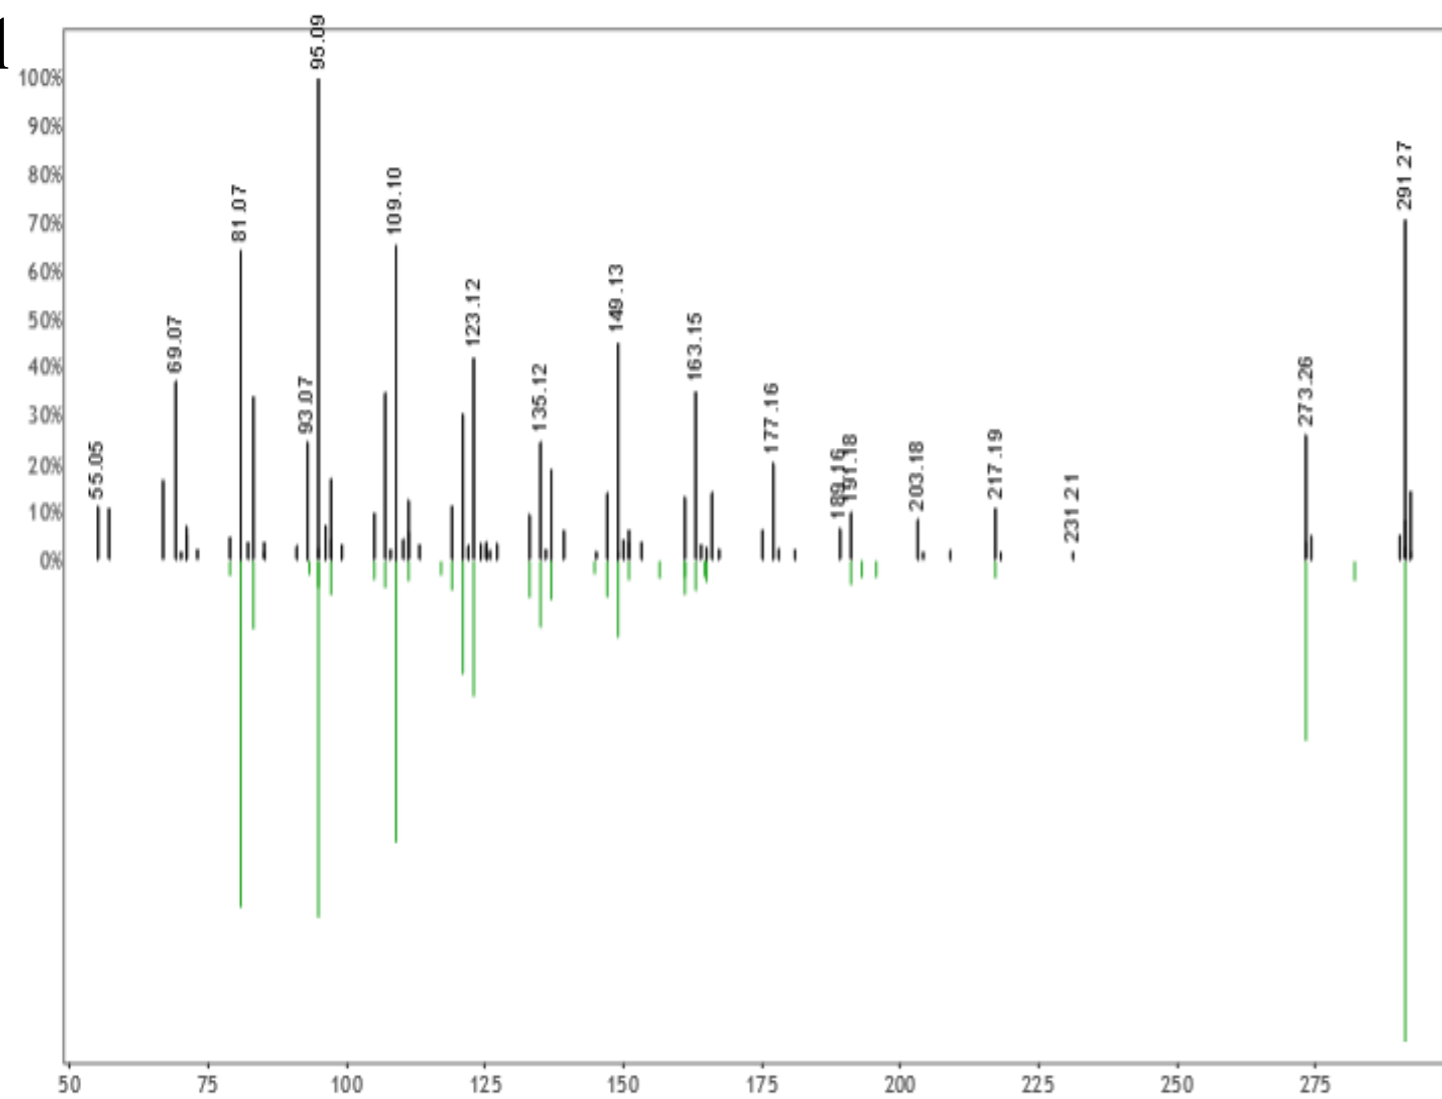**ar**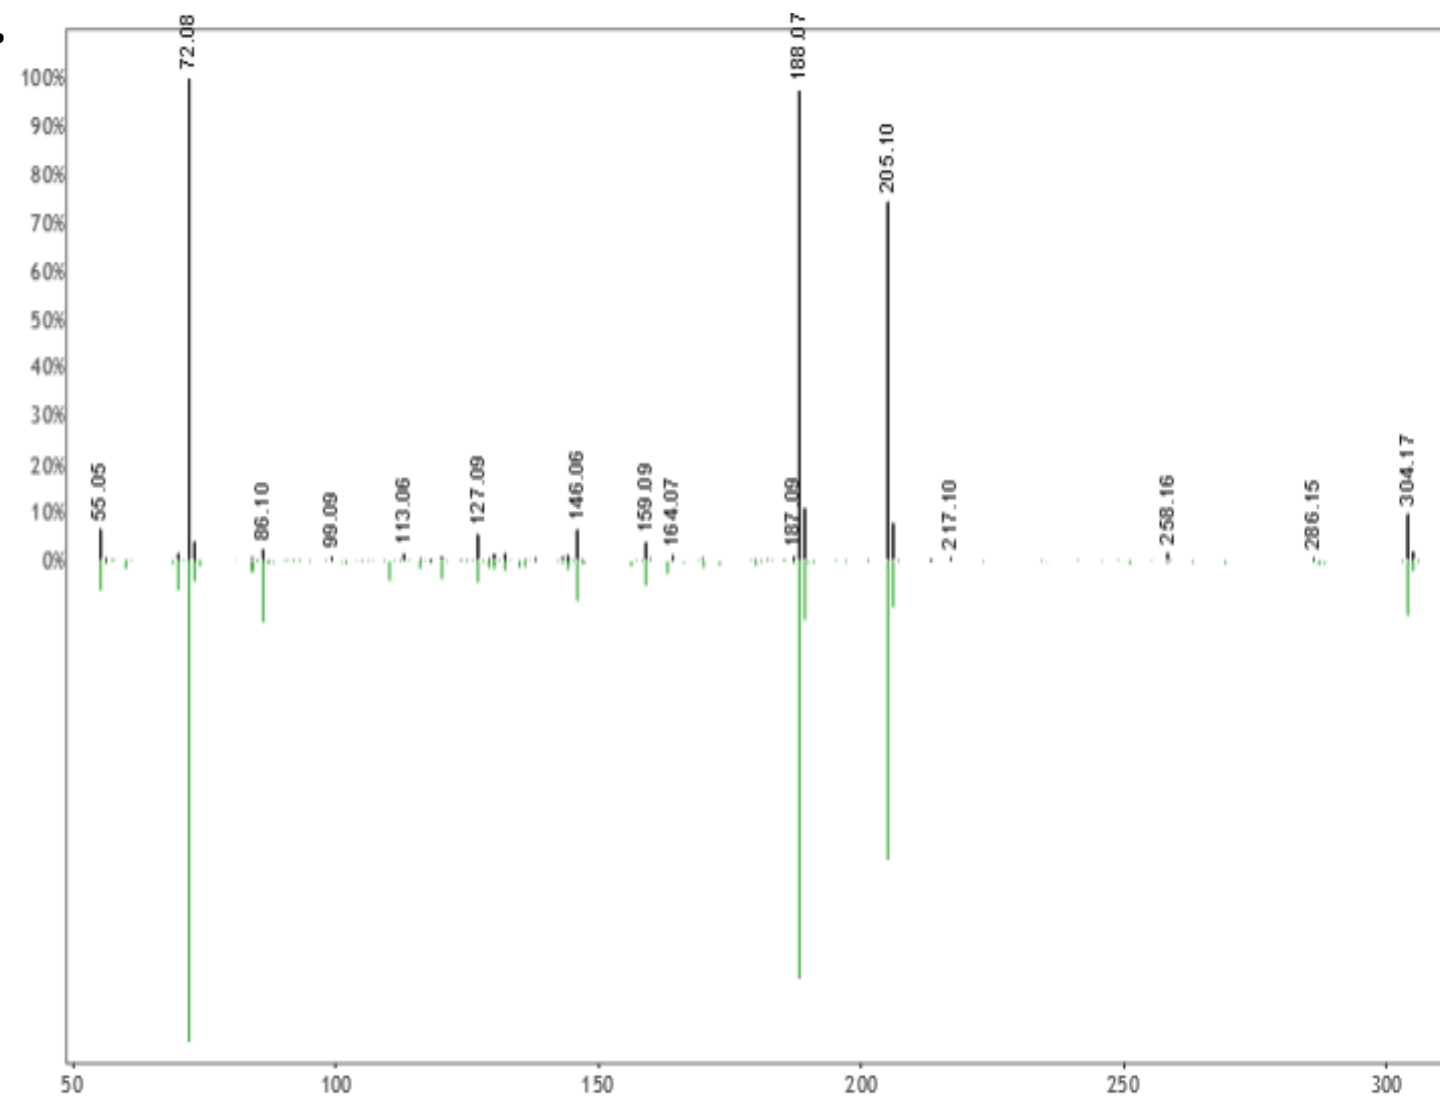

**as**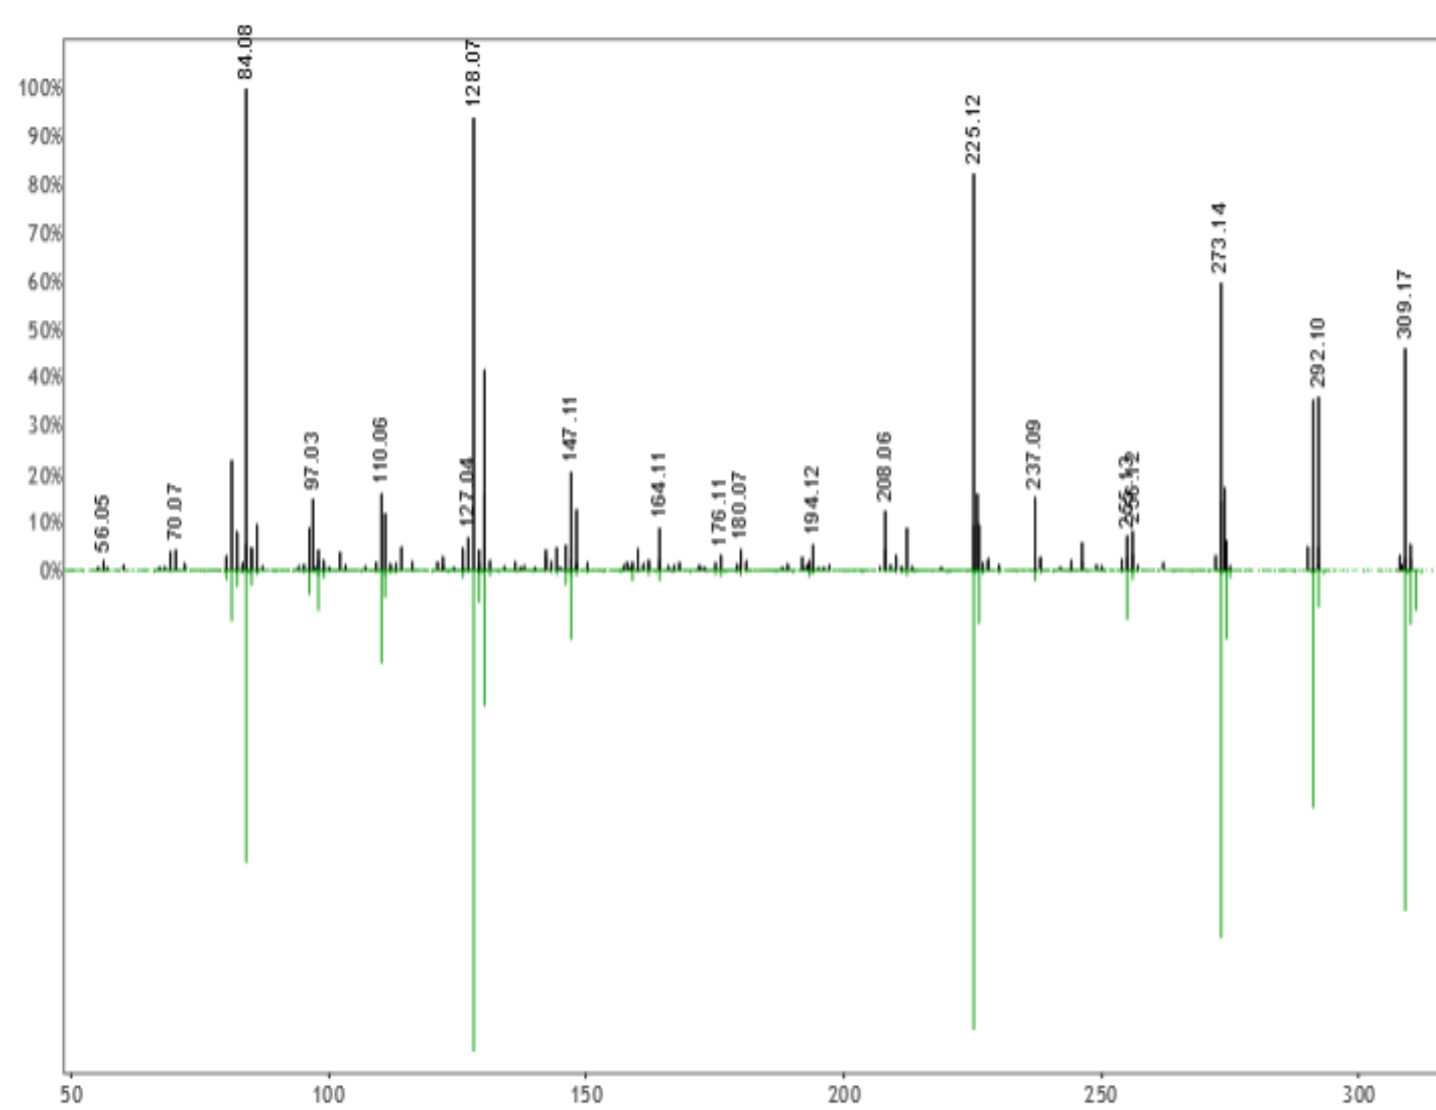**at**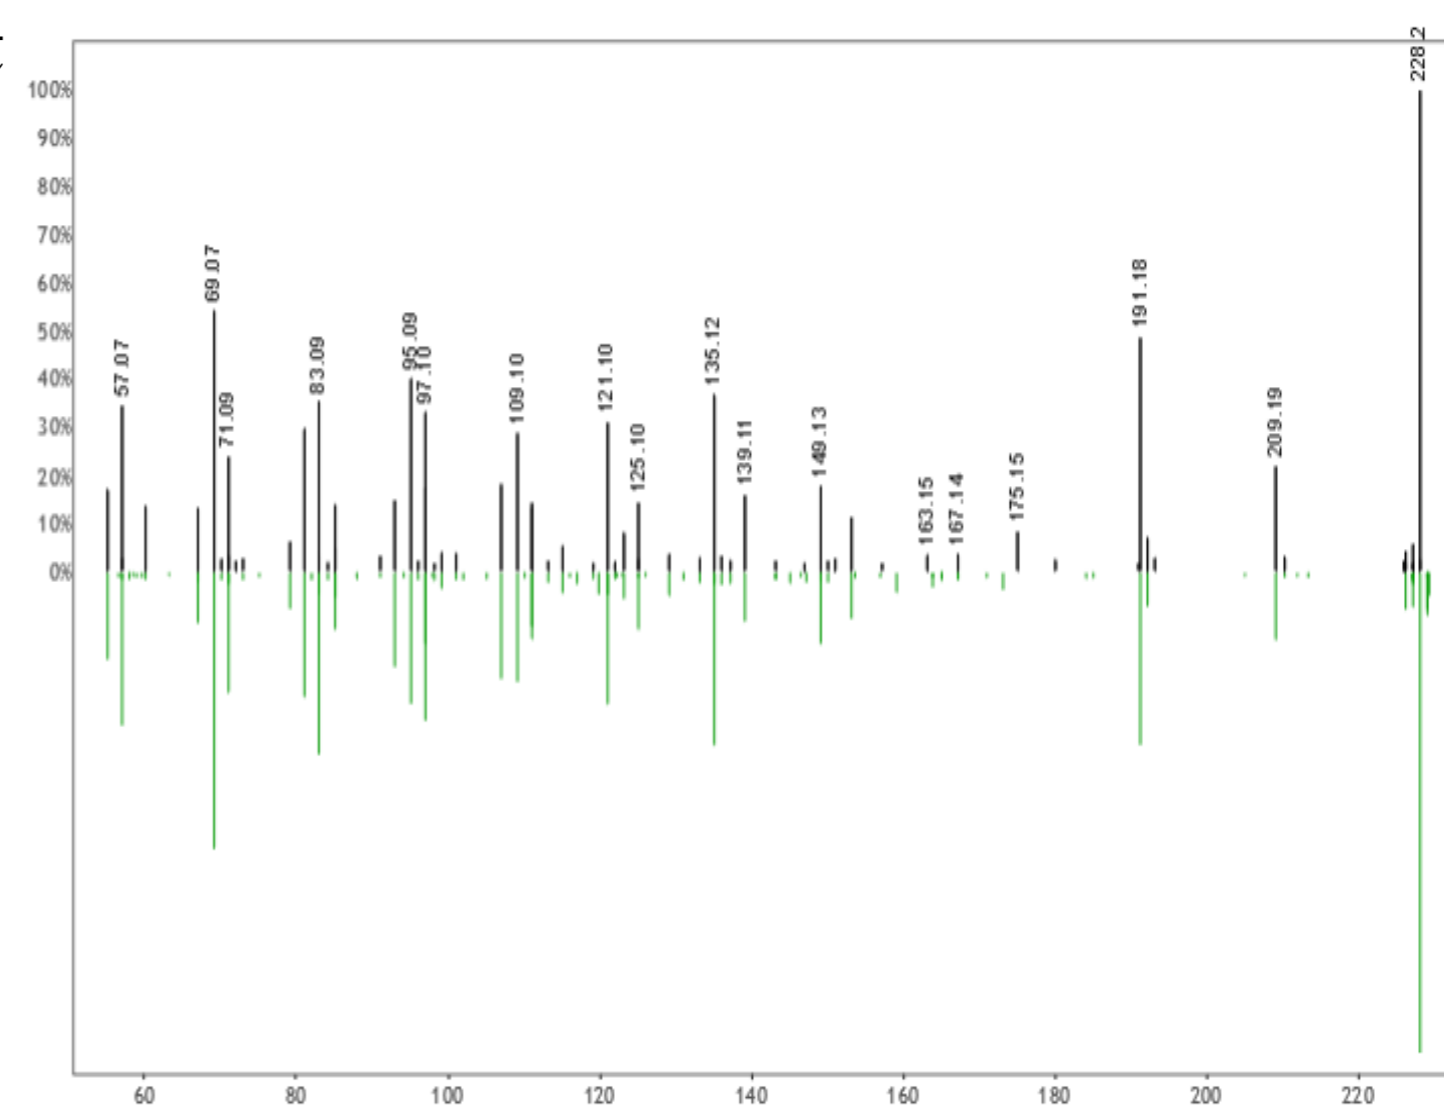**au**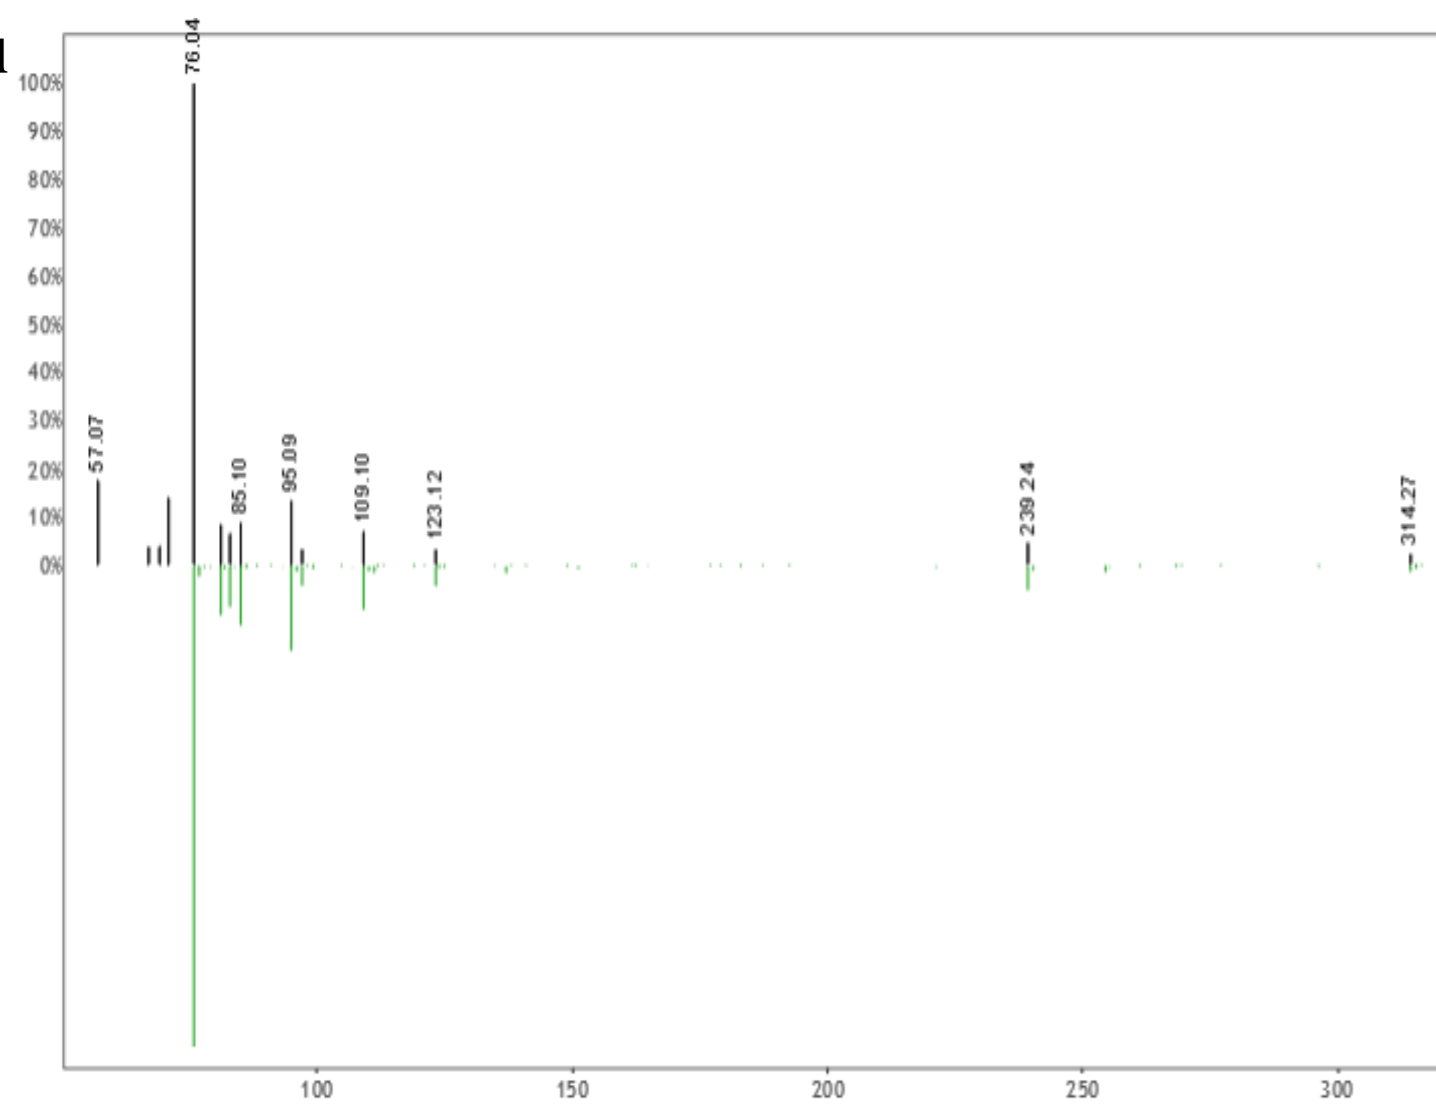**av**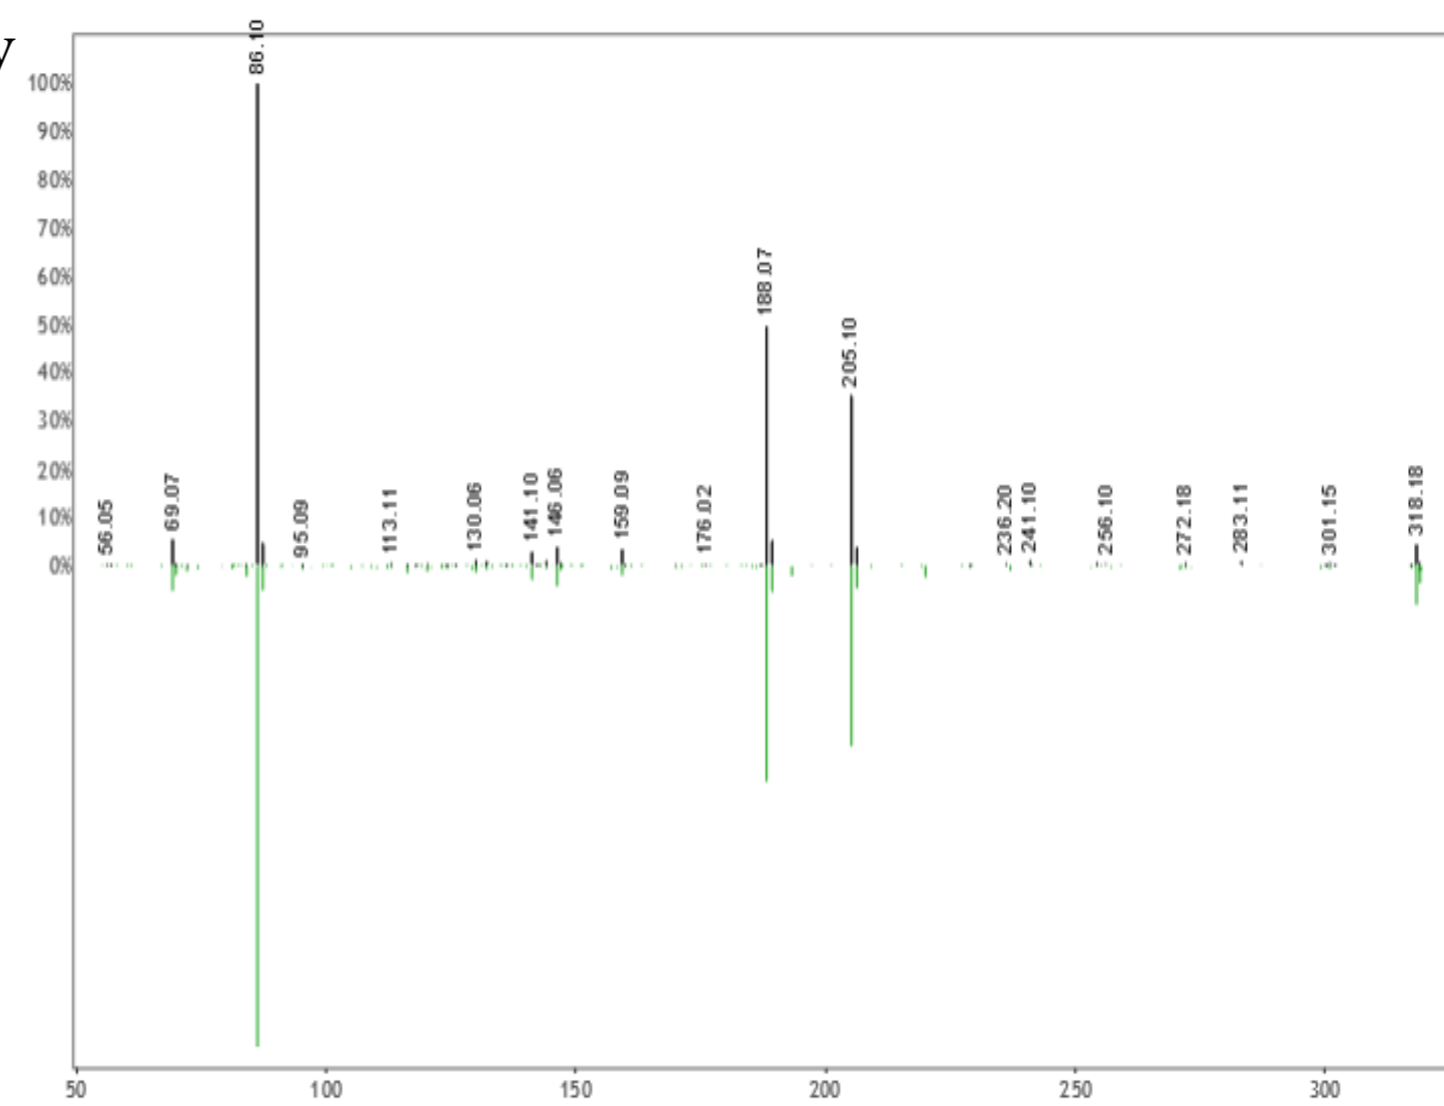

**aw**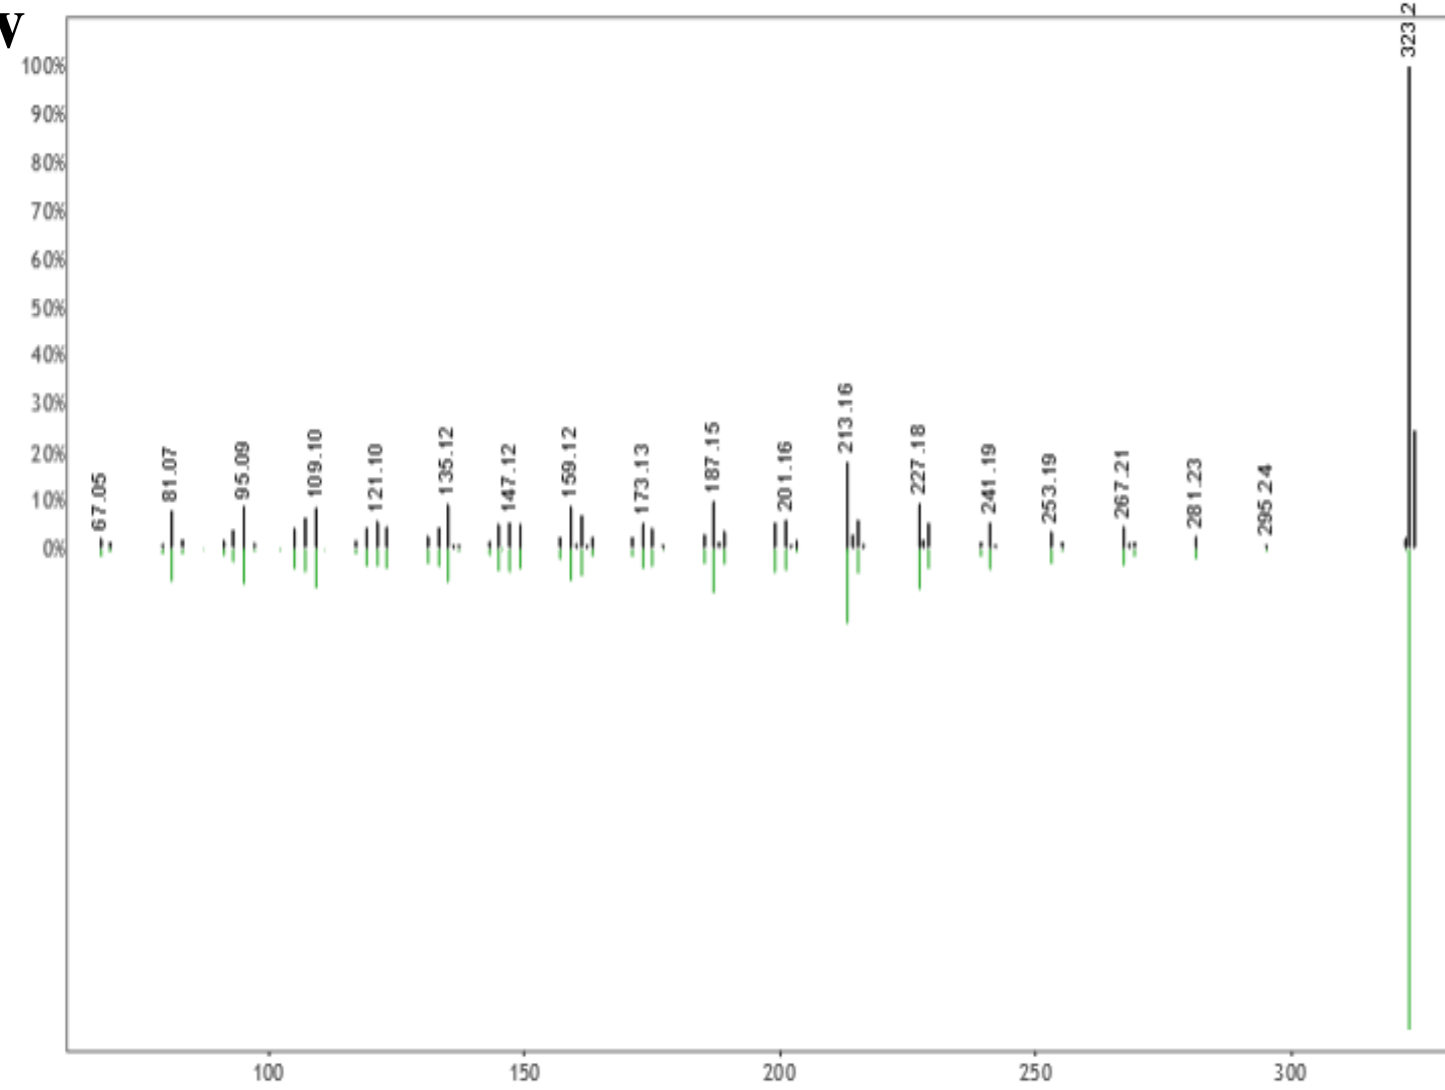**ax**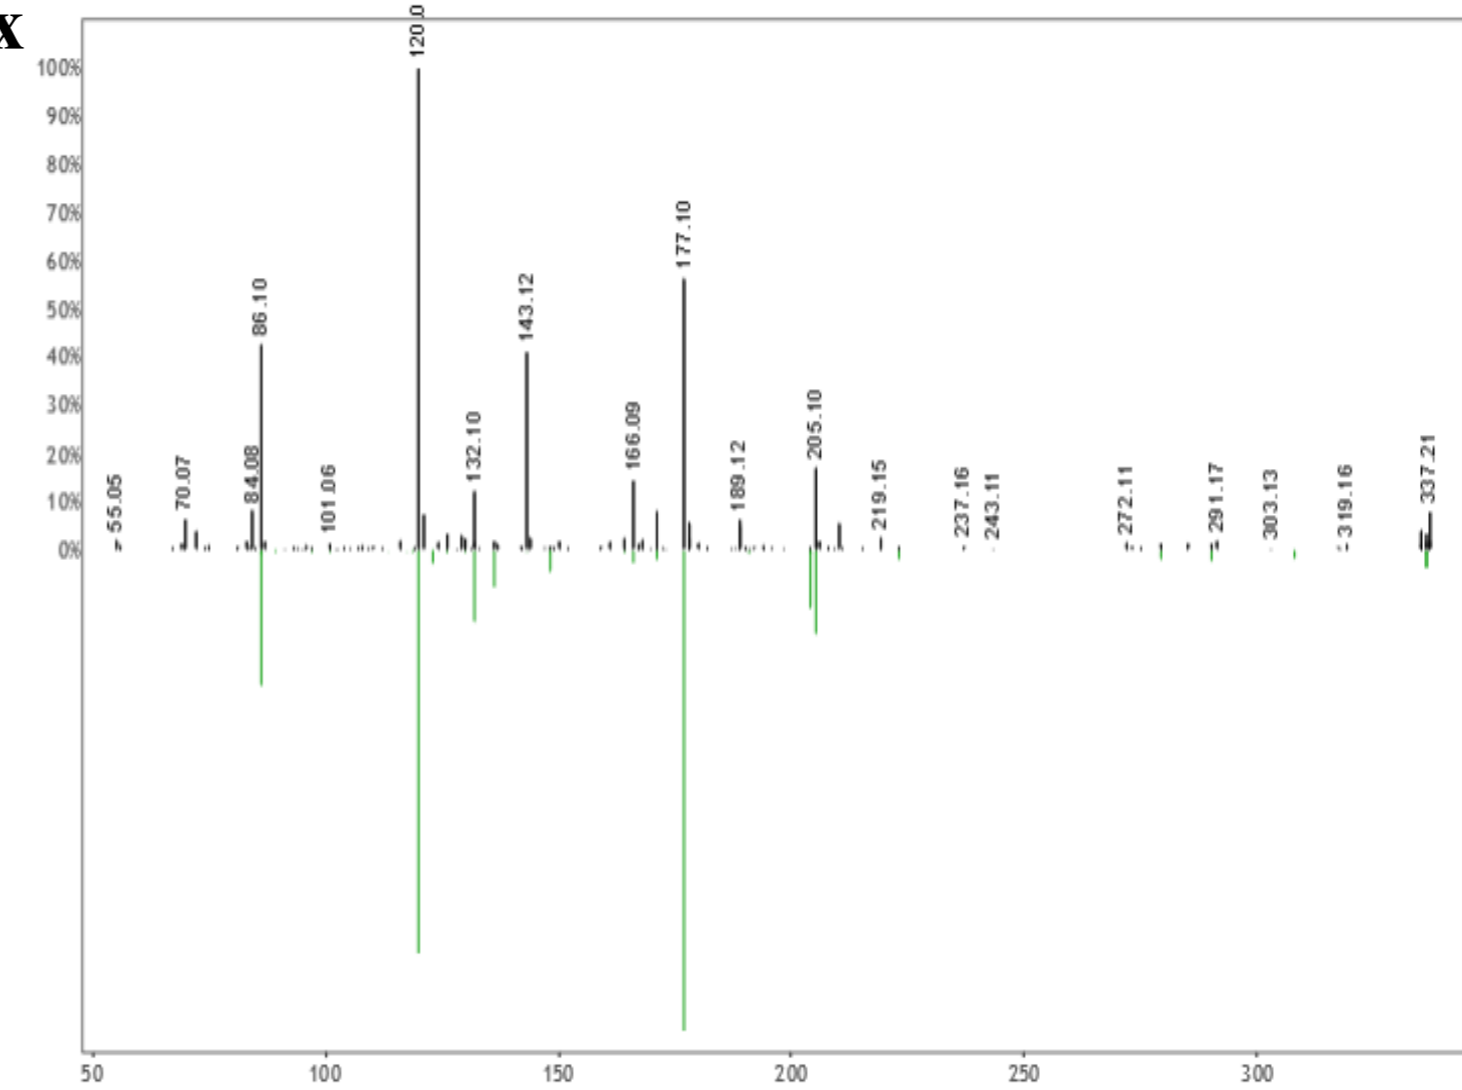**ay**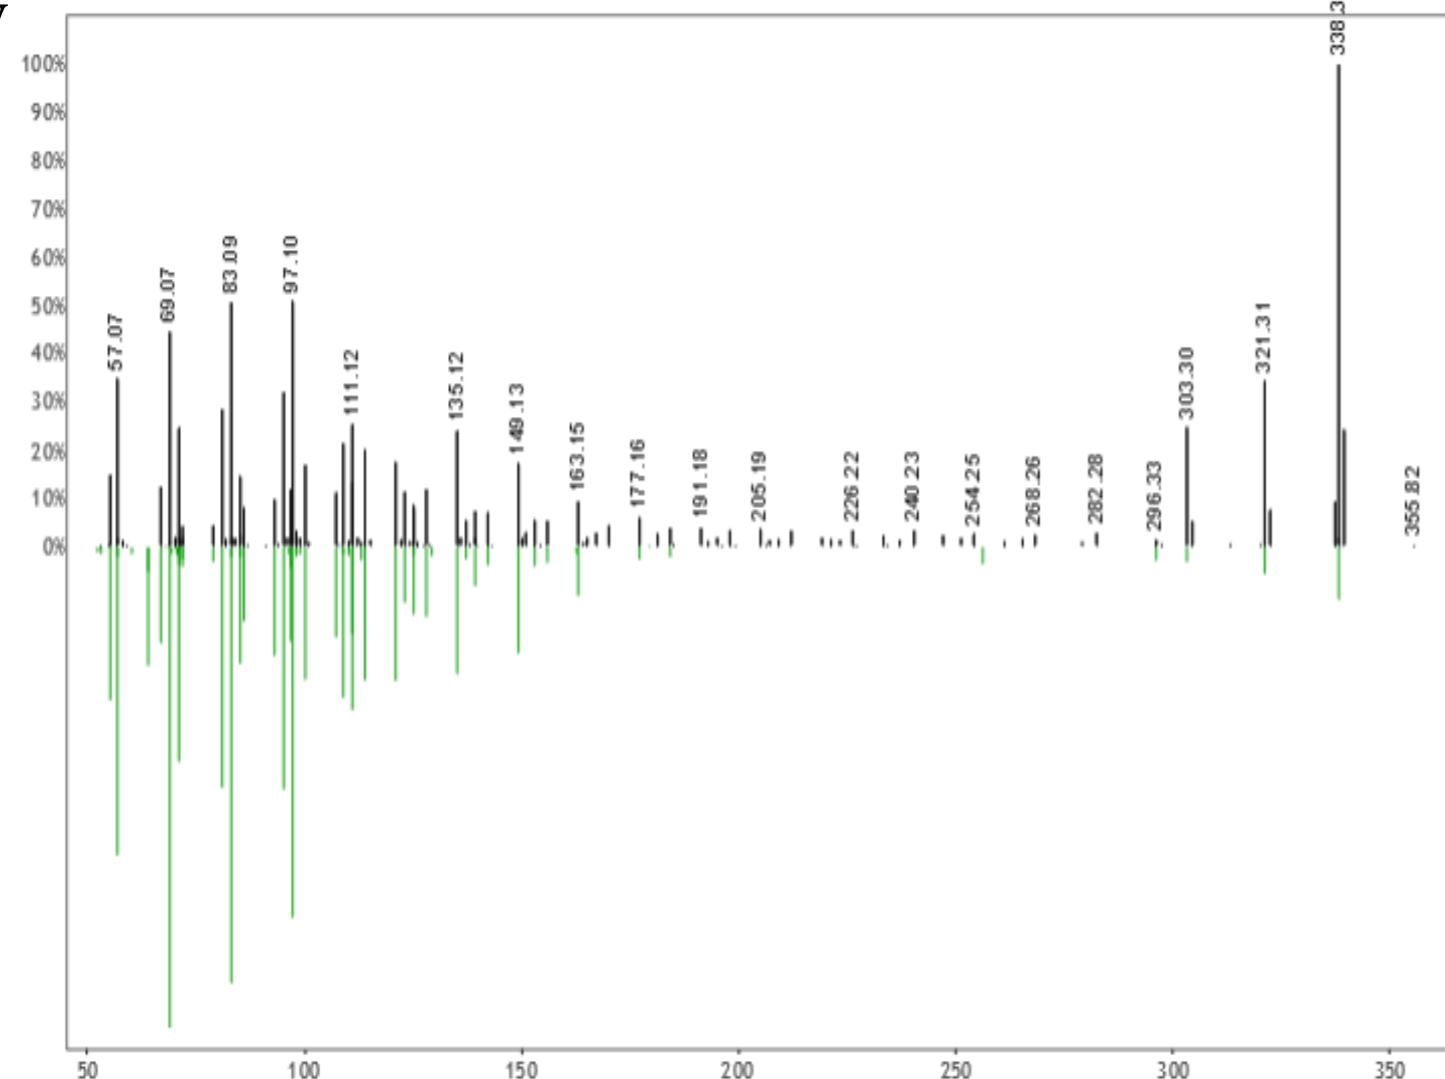**az**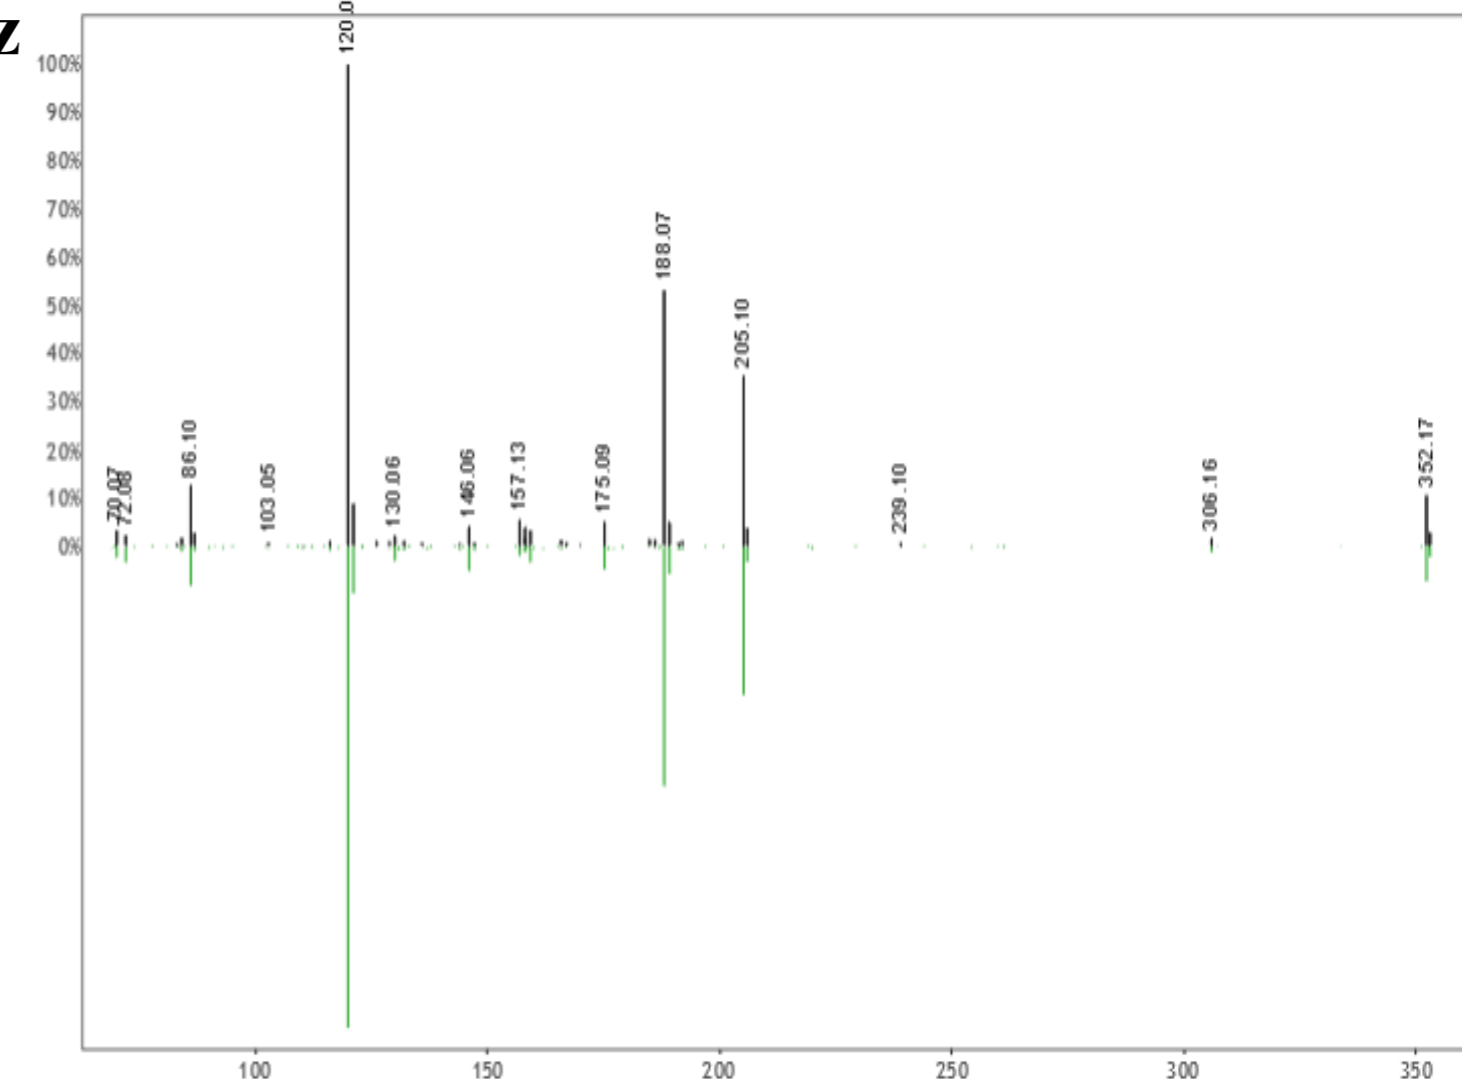

**ba**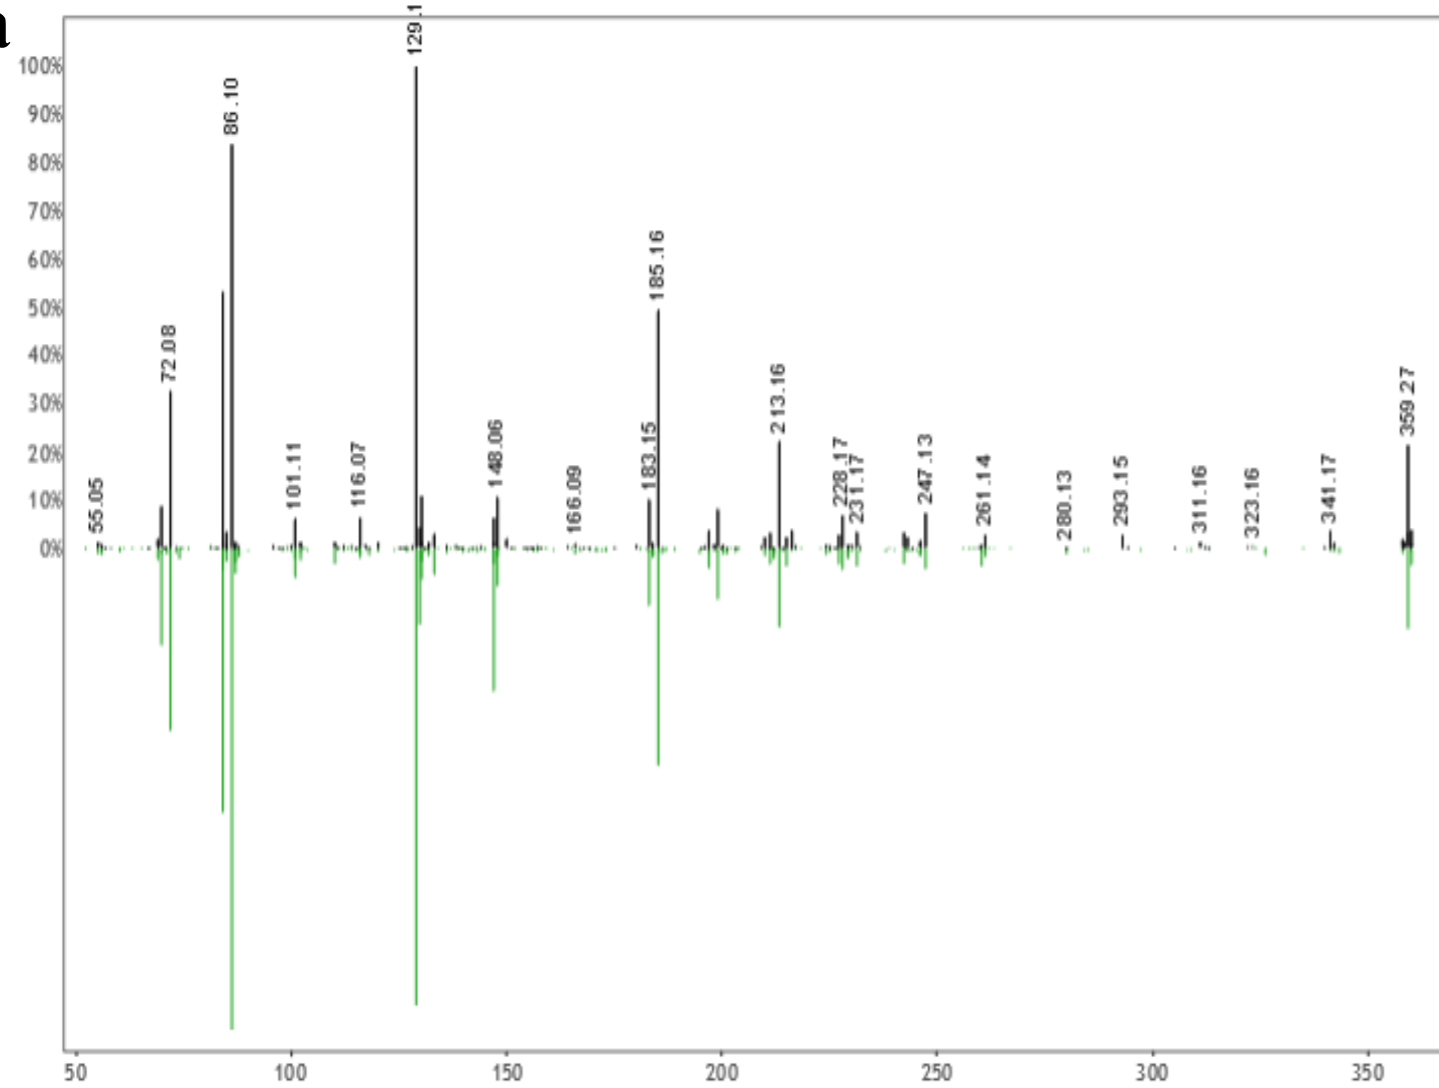**bb**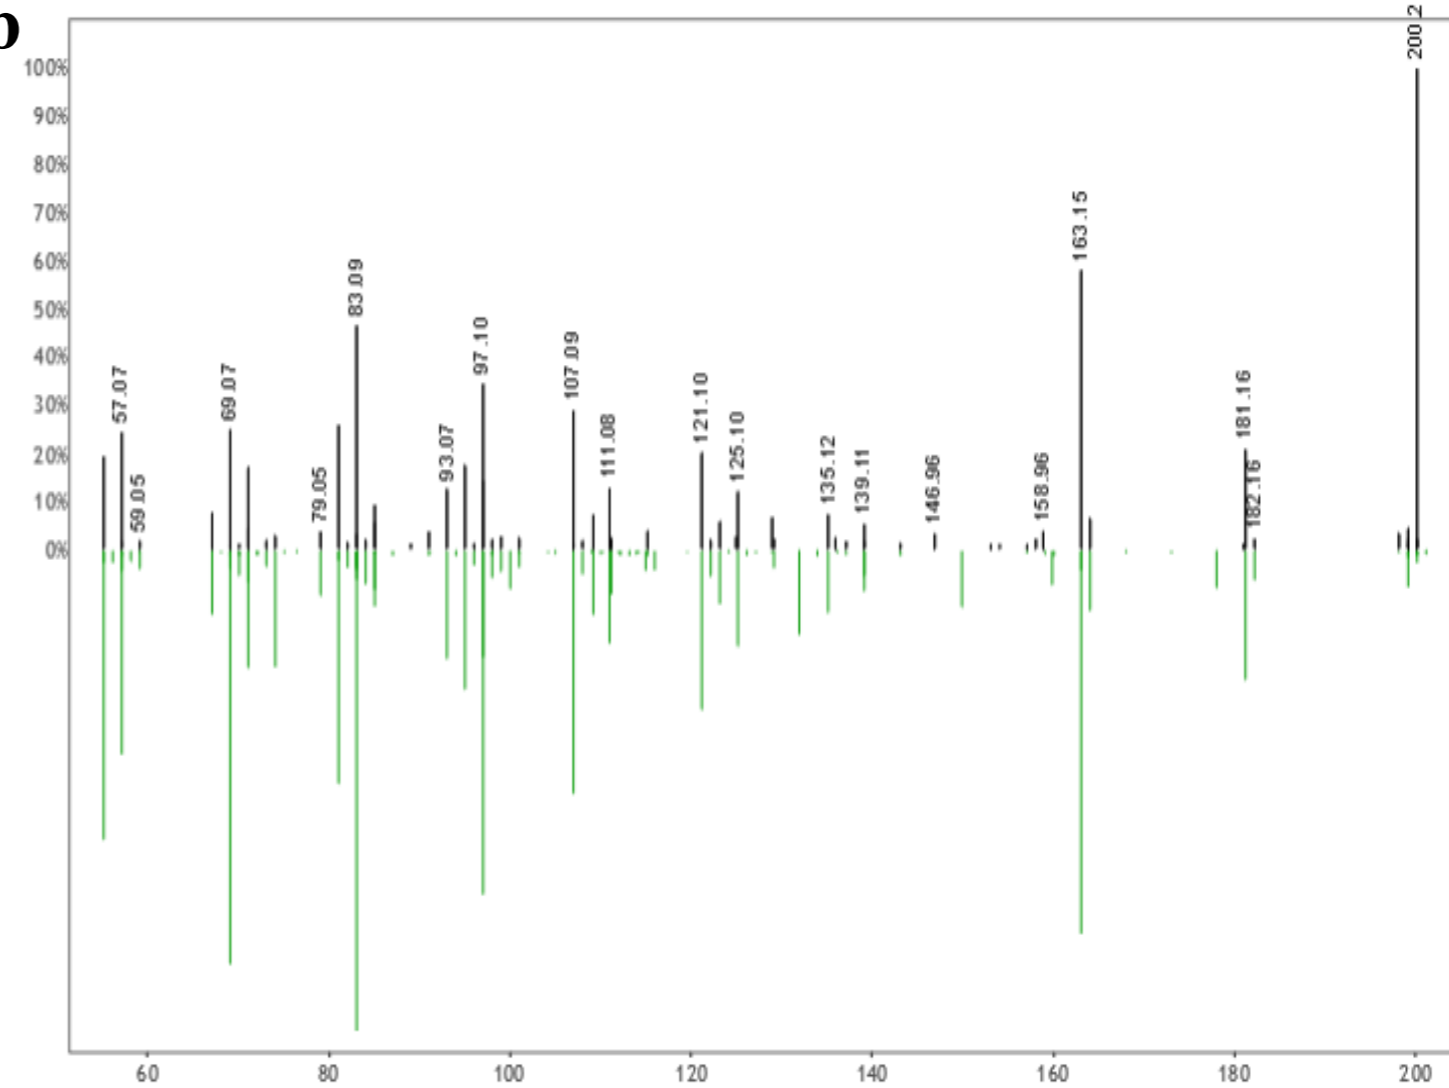**bc**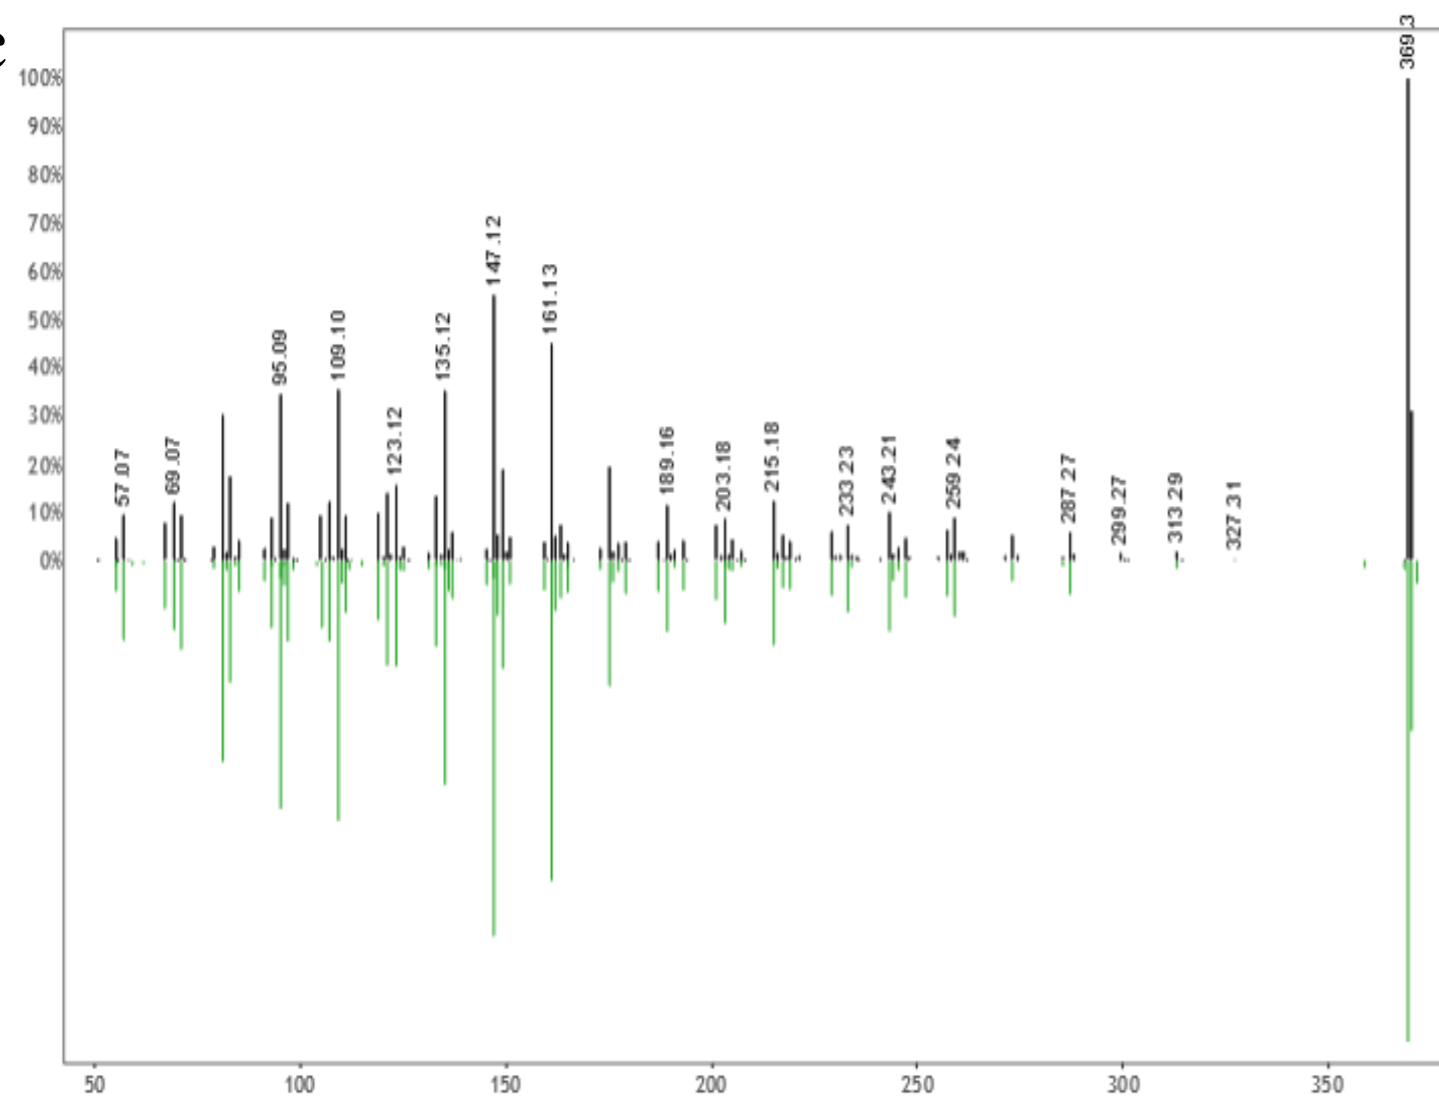**bd**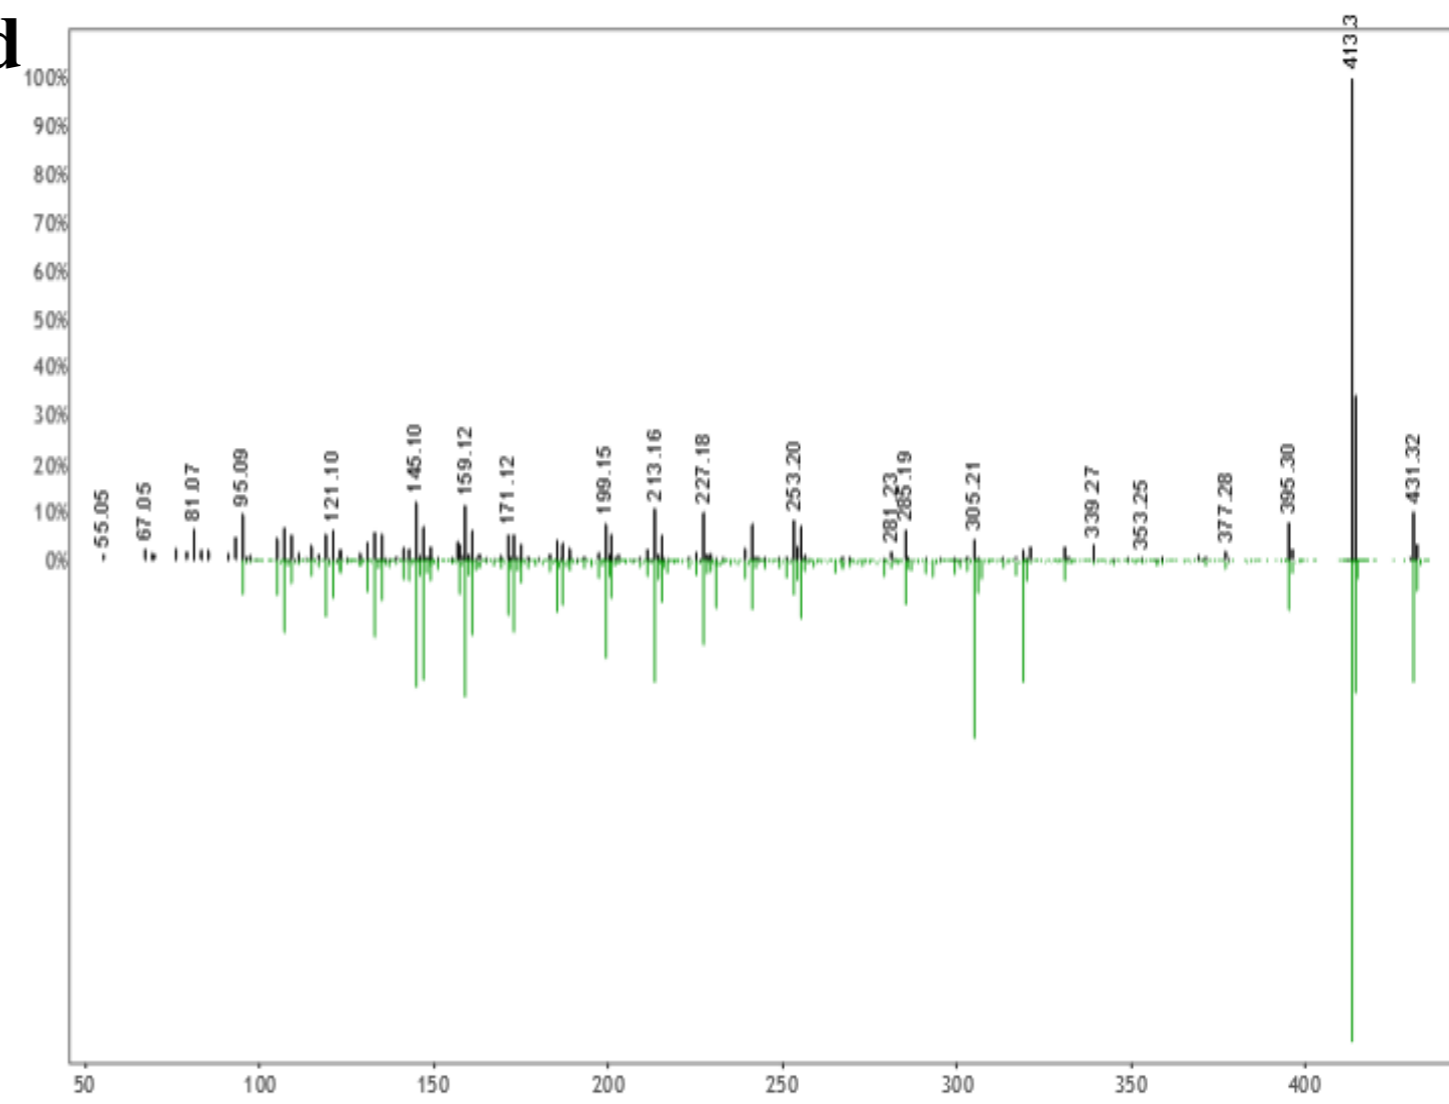

**be**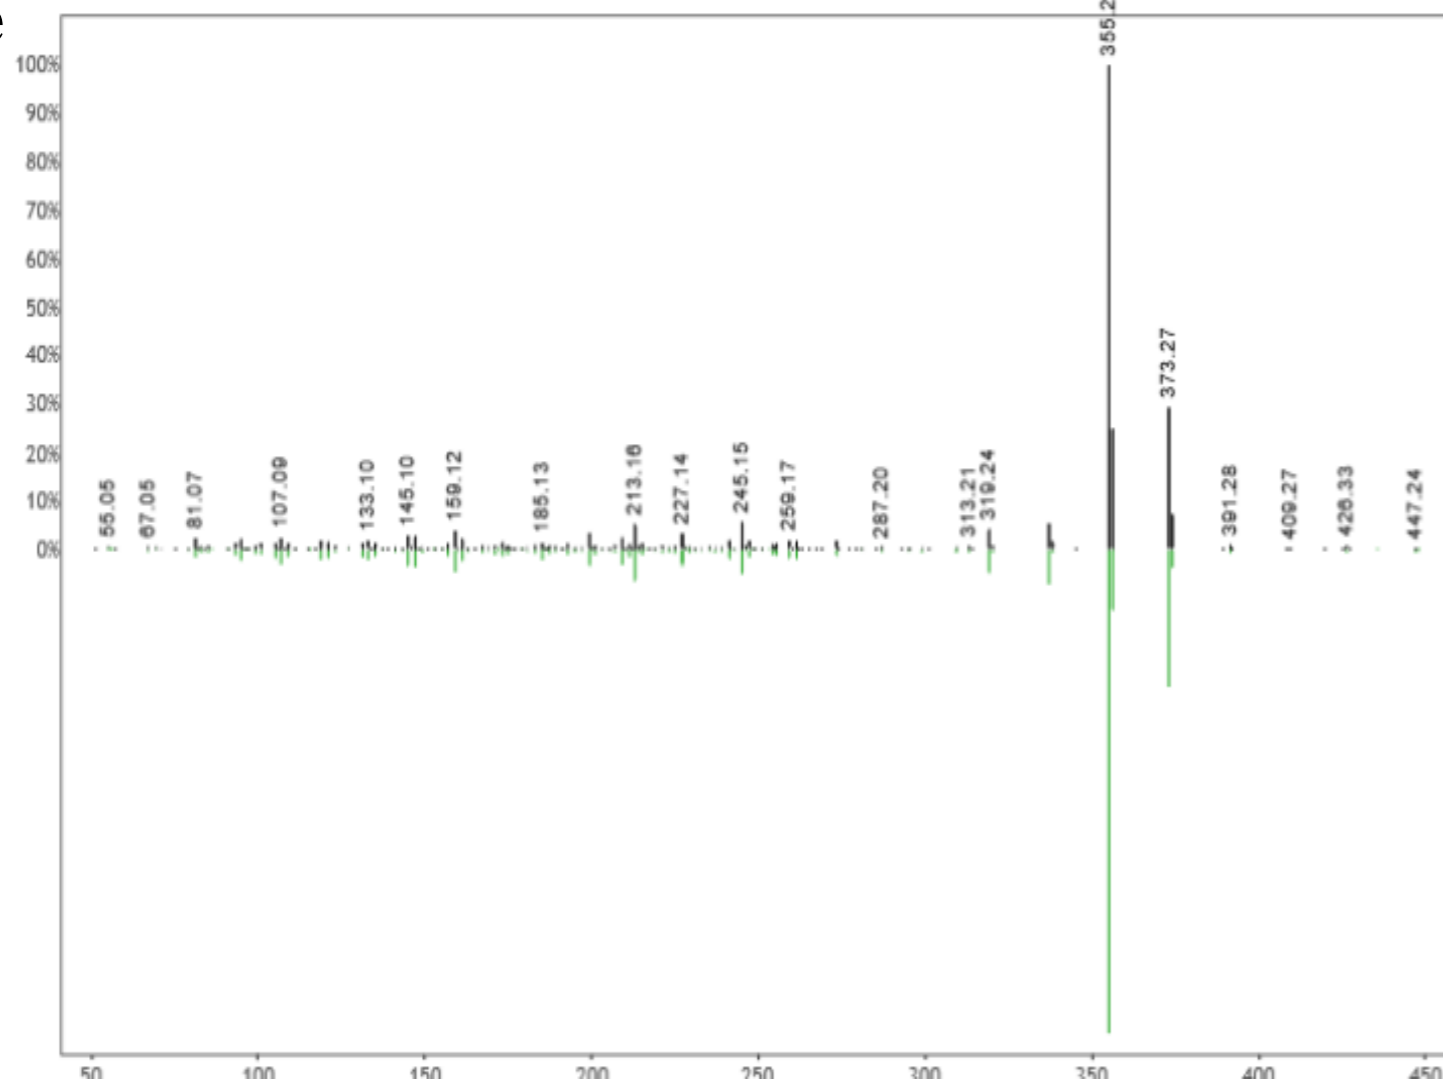**bf**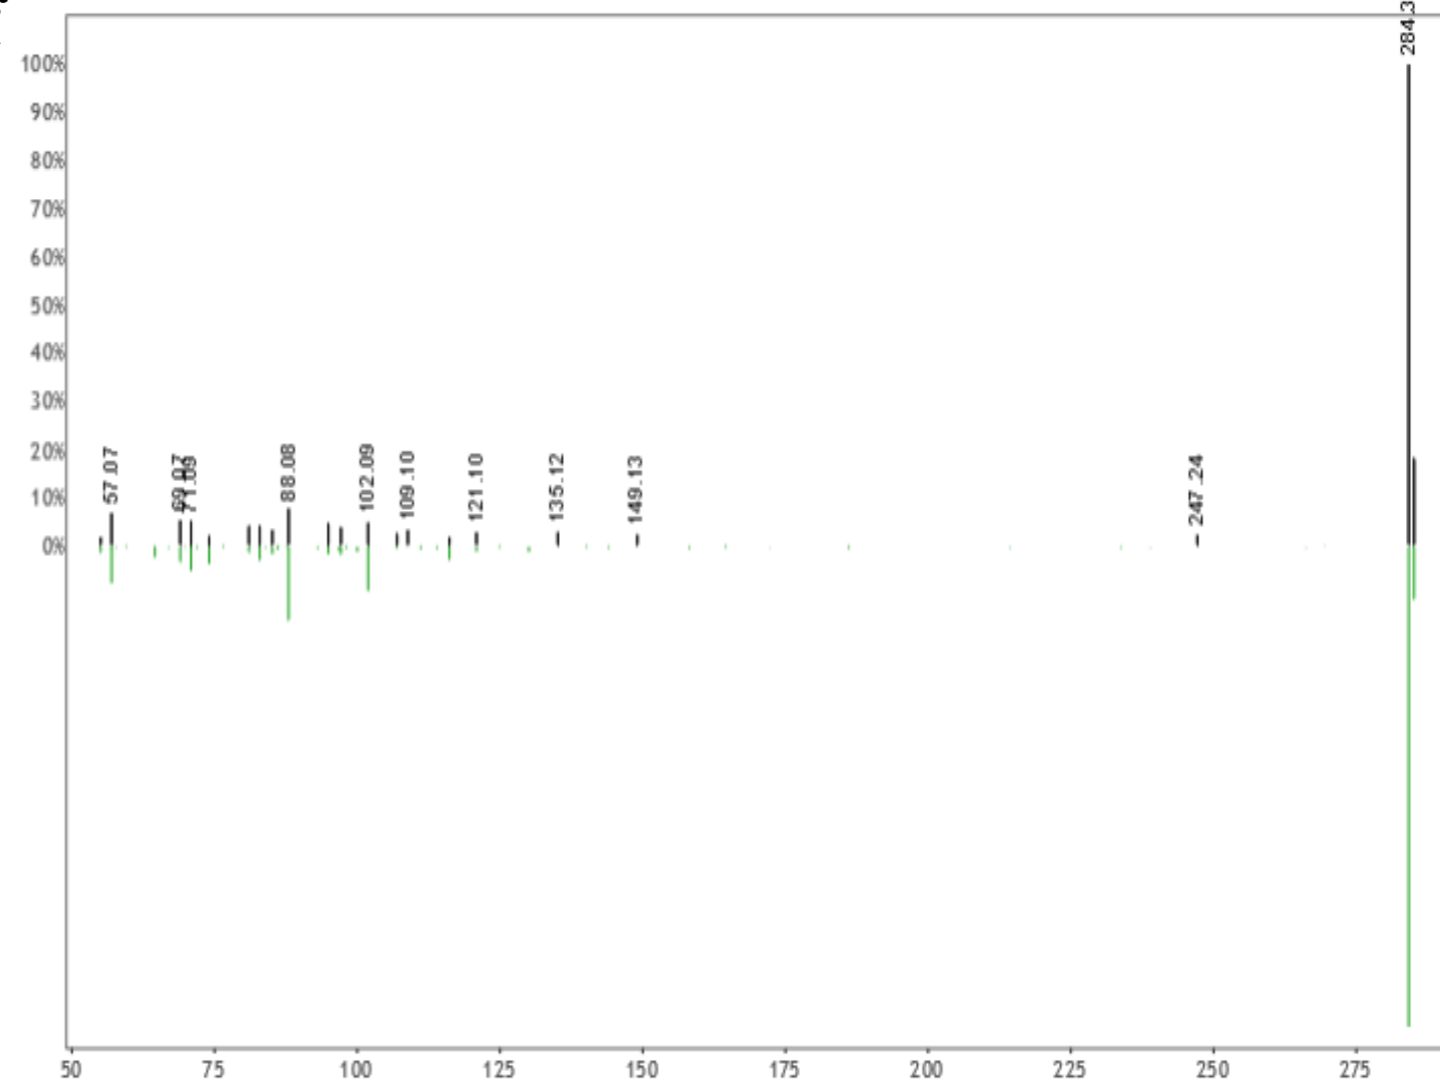**bg**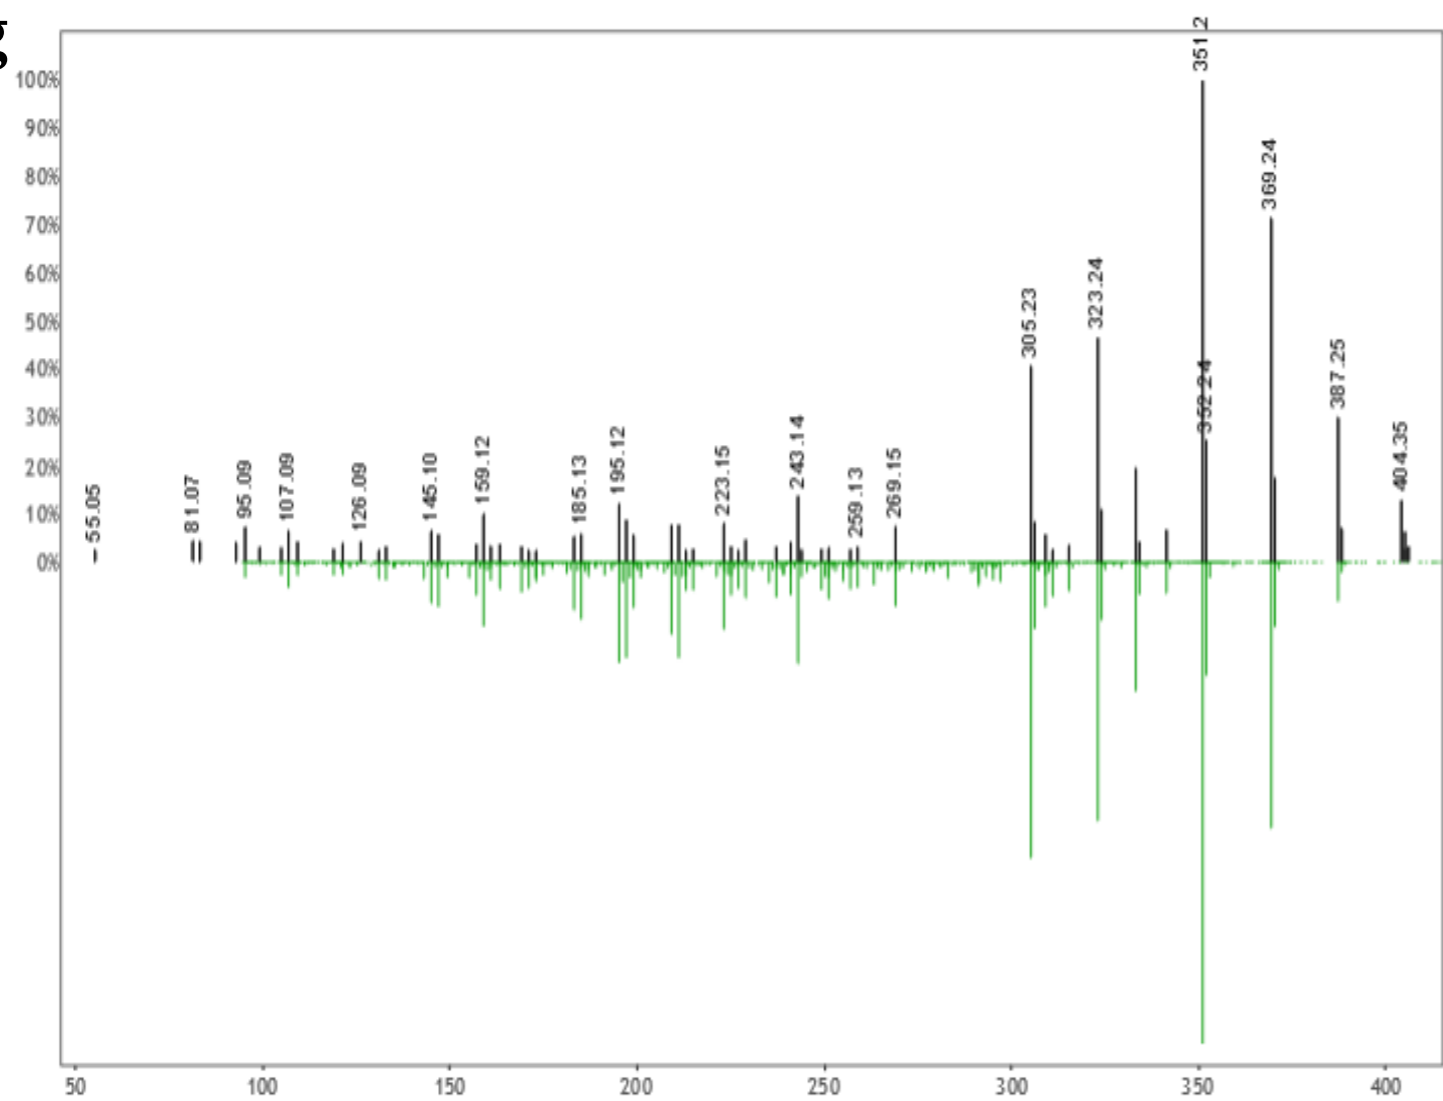**bh**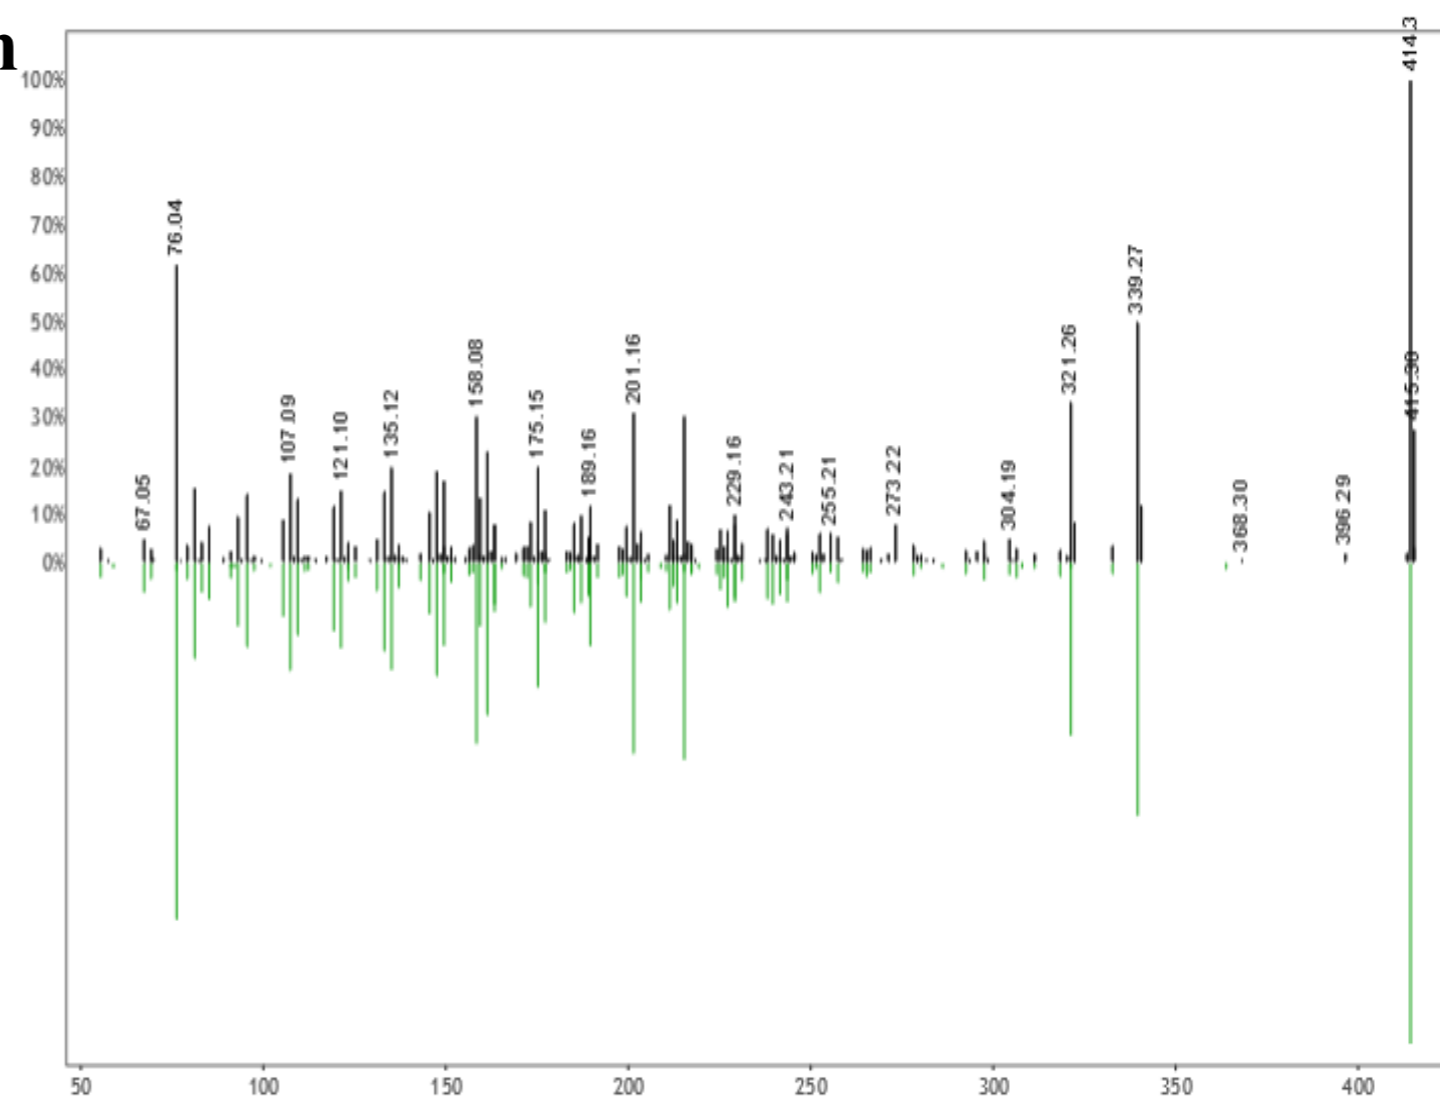

**bi**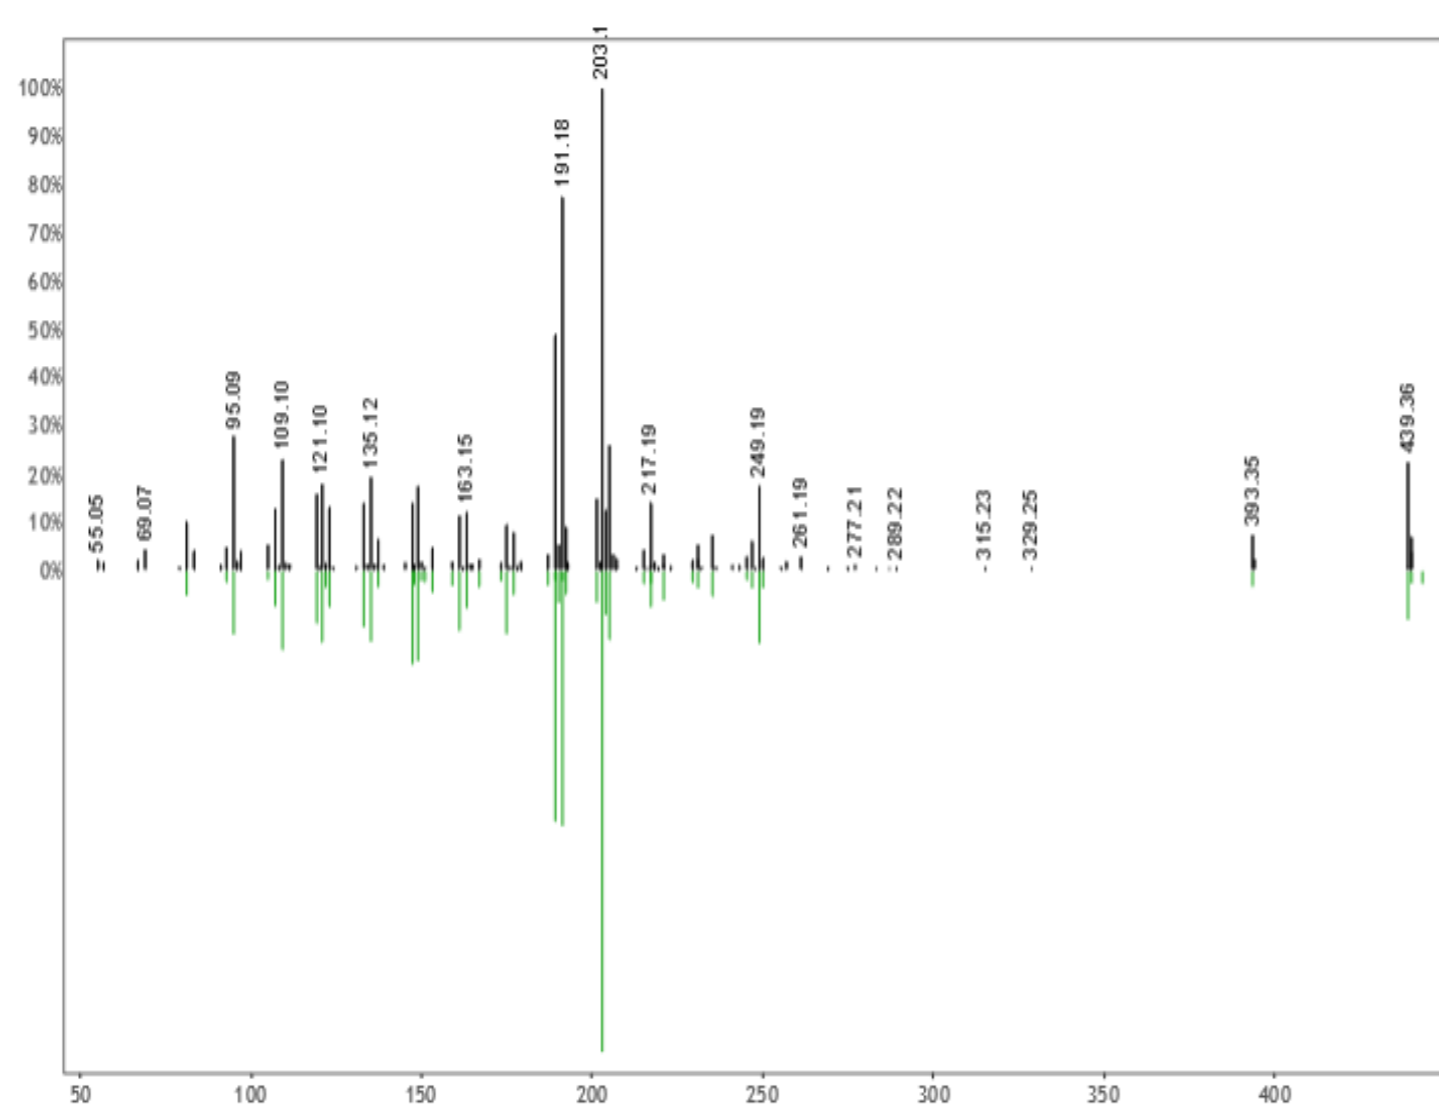**bj**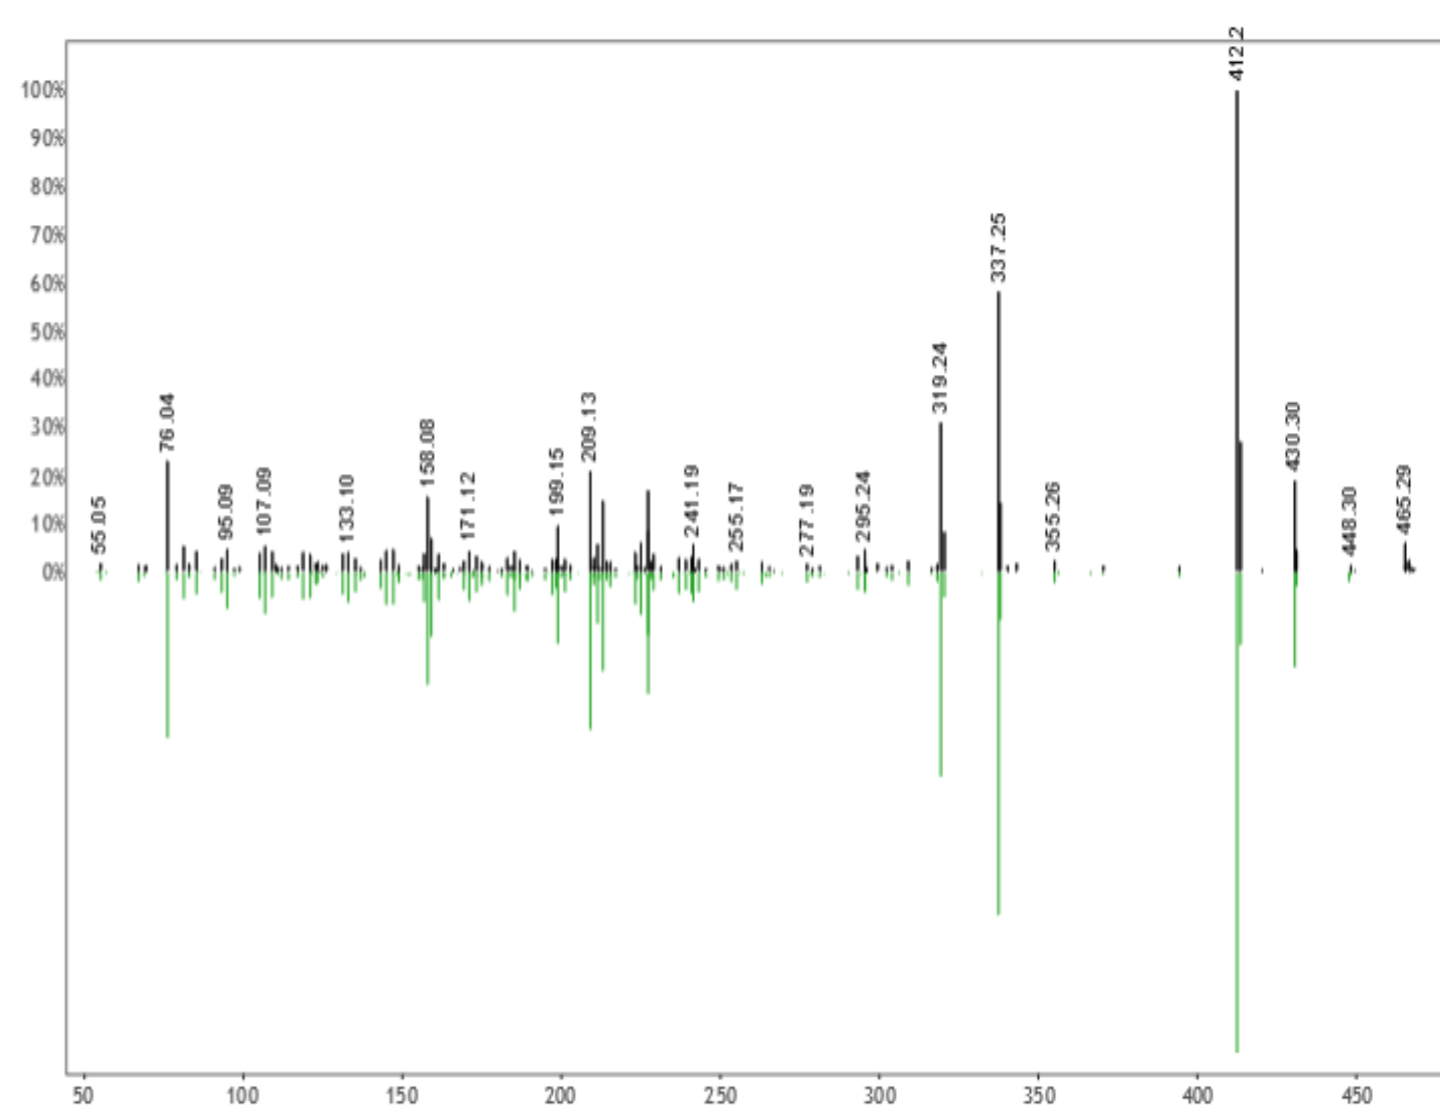**bk**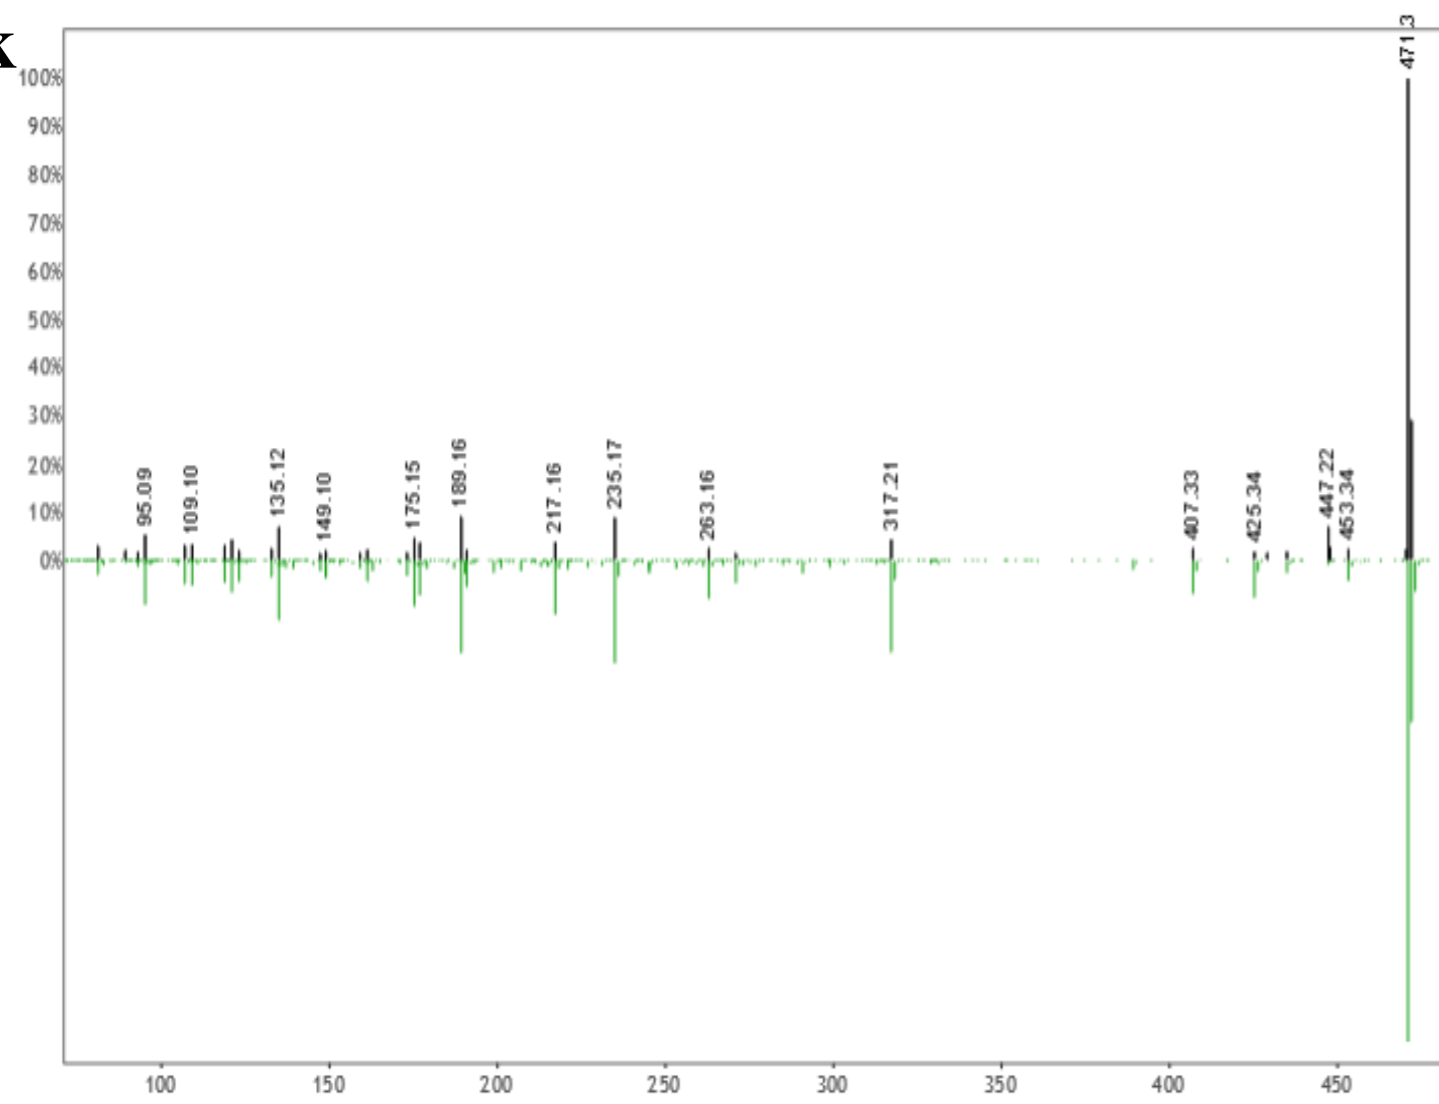**bl**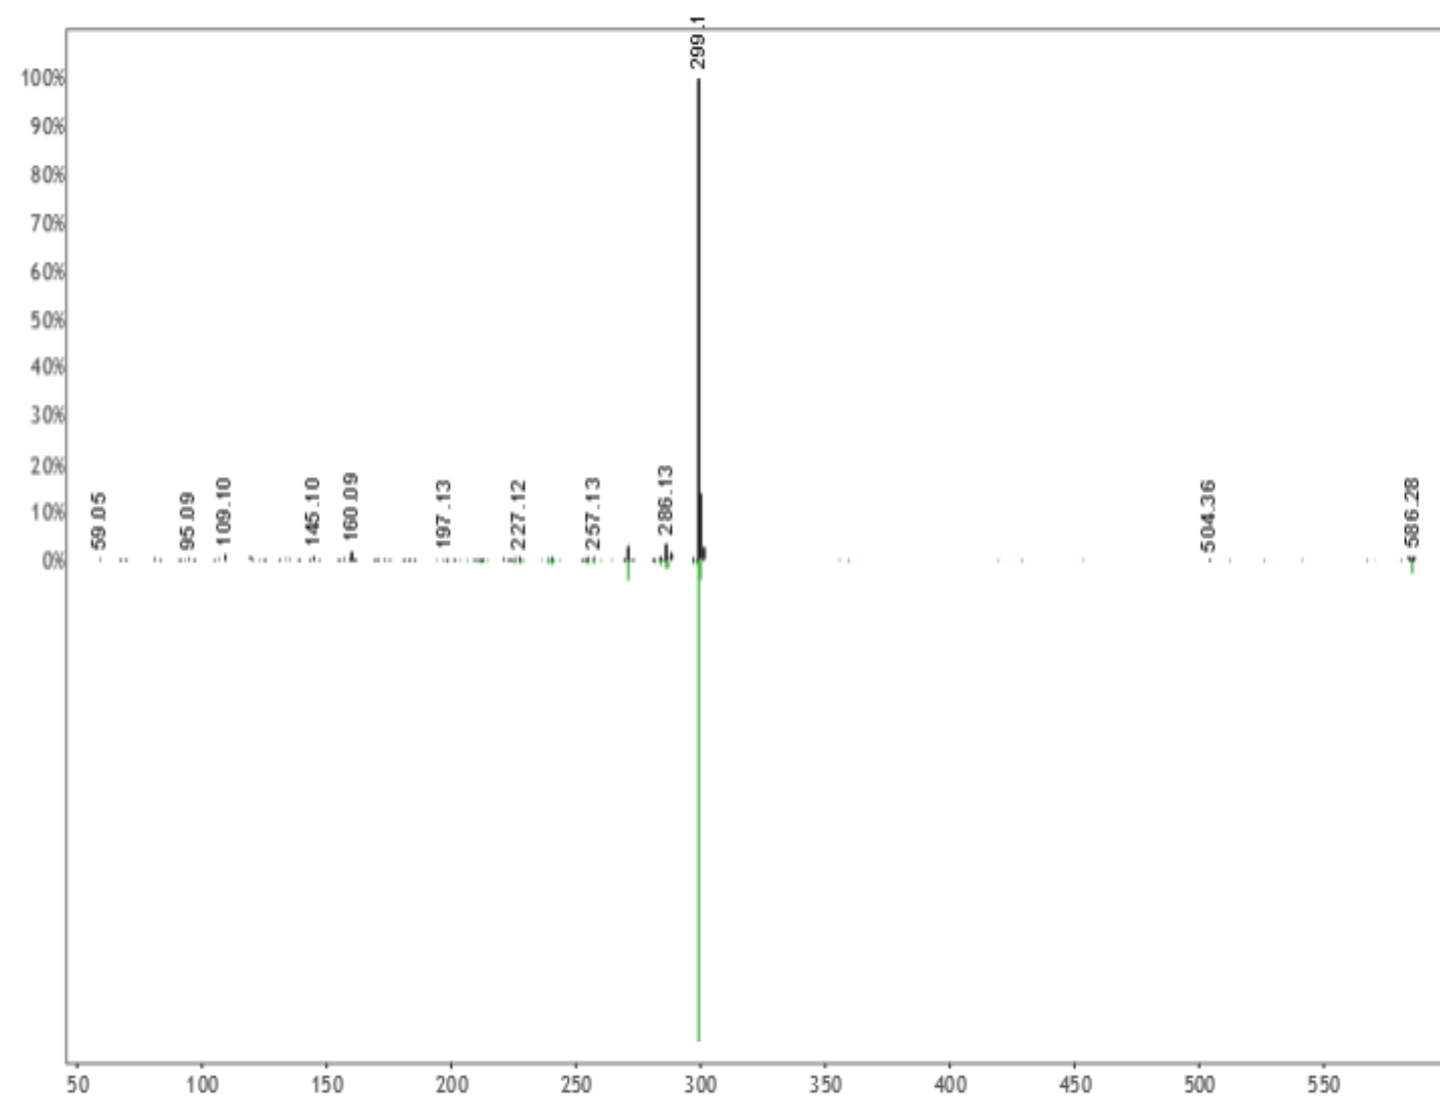



**bm**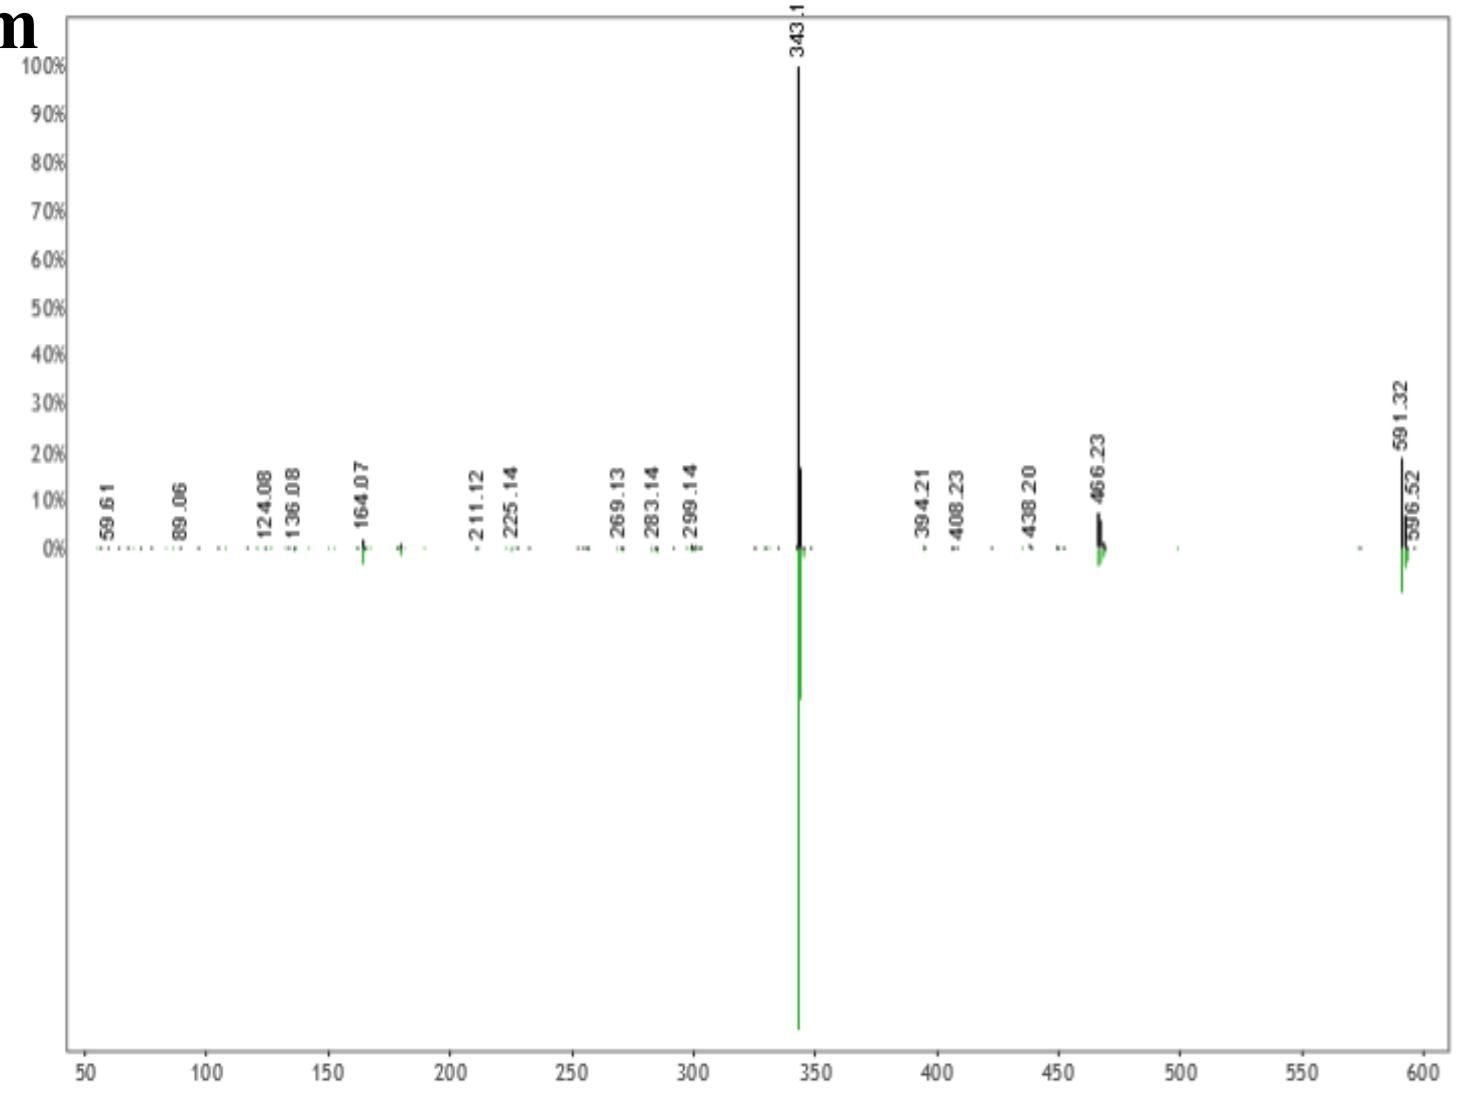**bn**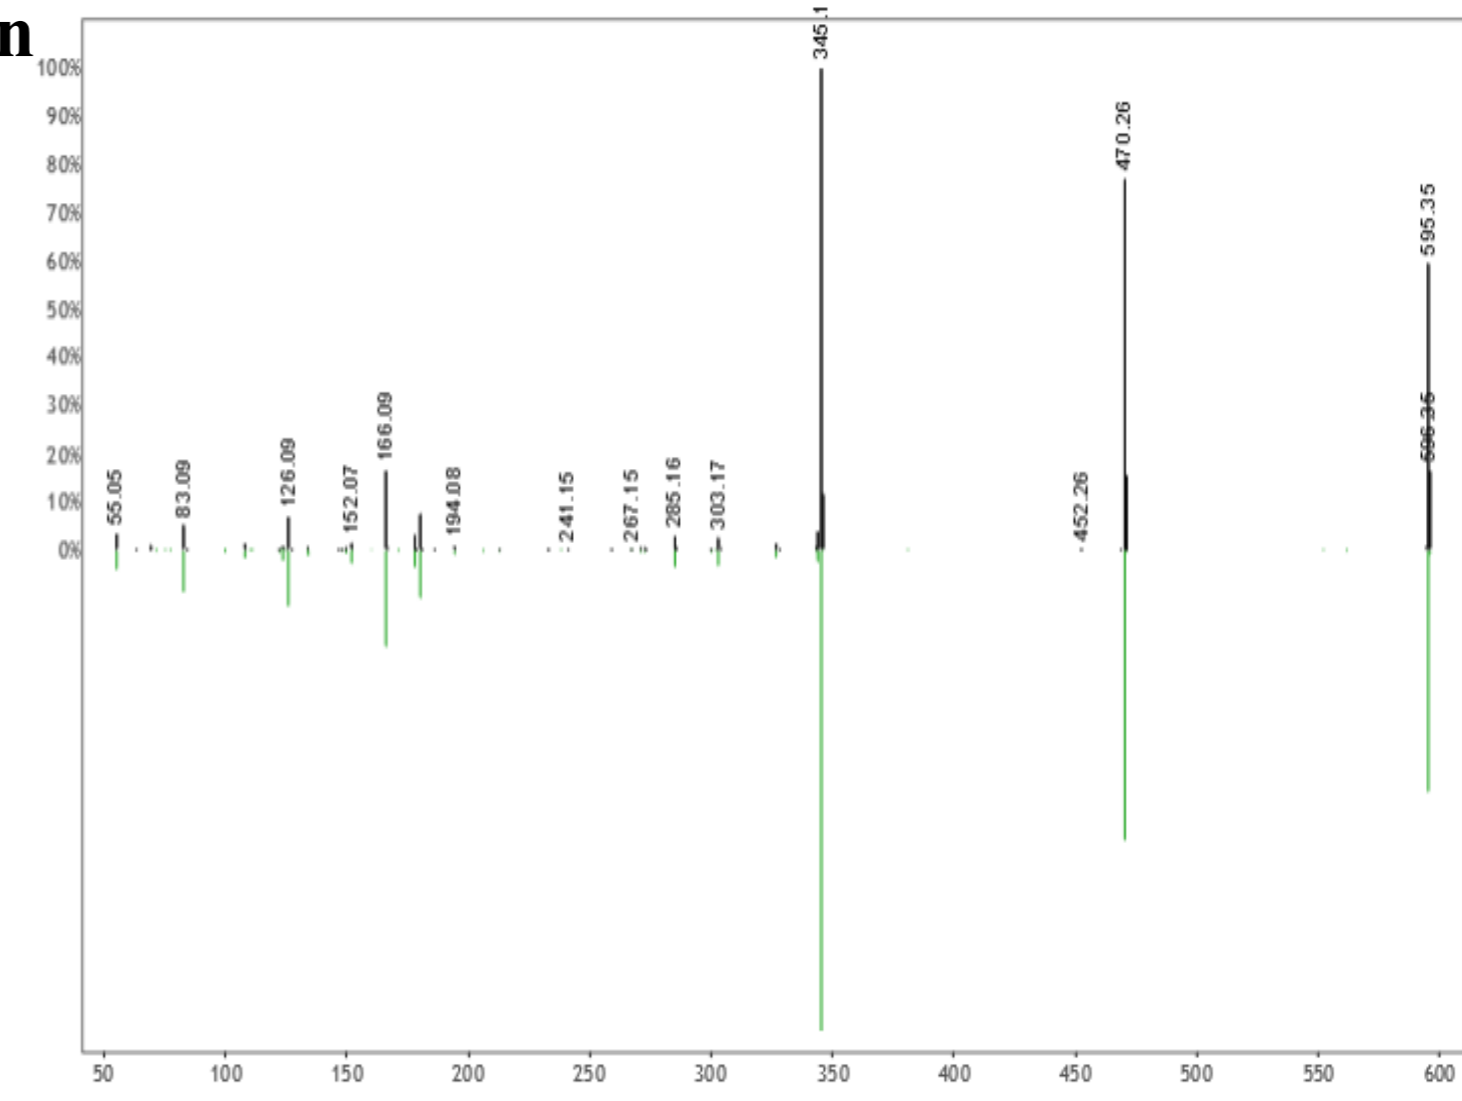**bo**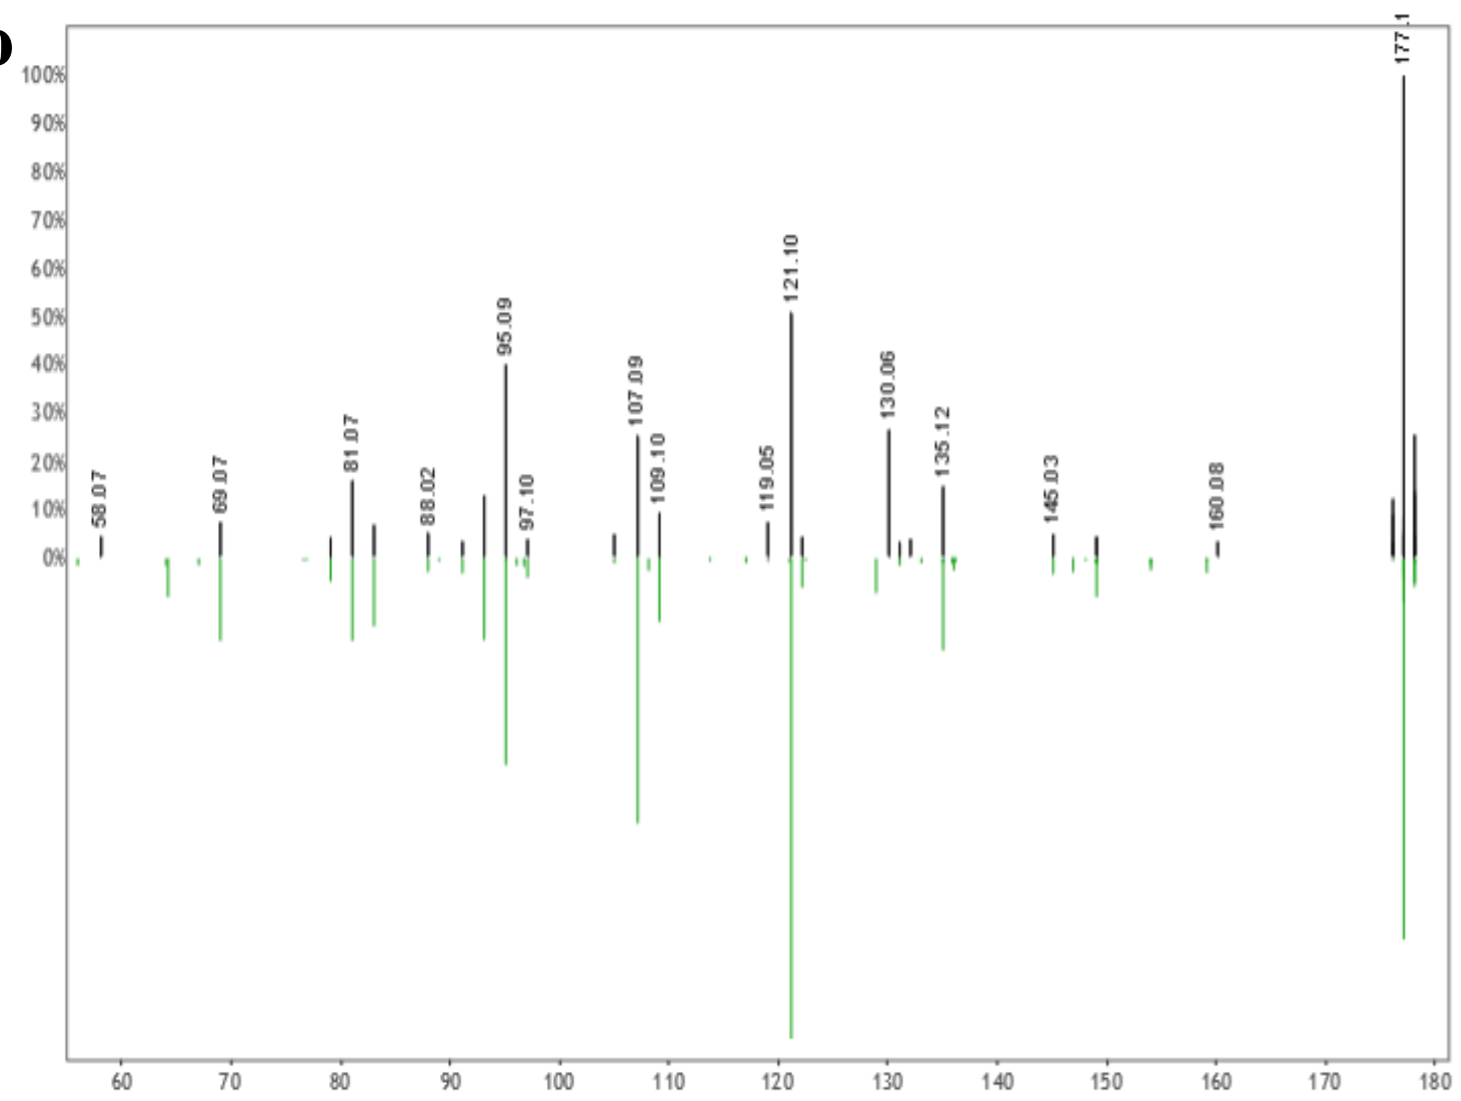

Supplement: msystems.00710-22-s0003.pdf [file msystems.00710-22-s0003.pdf]
