# Supplementary material for: Untargeted Fecal Metabolomic Analyses across an Industrialization Gradient Reveal Shared Metabolites and Impact of Industrialization on Fecal Microbiome-Metabolome Interactions
Source: PubMed Central journal article supplement (PMC9765122; doi:10.1128/msystems.00710-22), 2022-11-23

**a**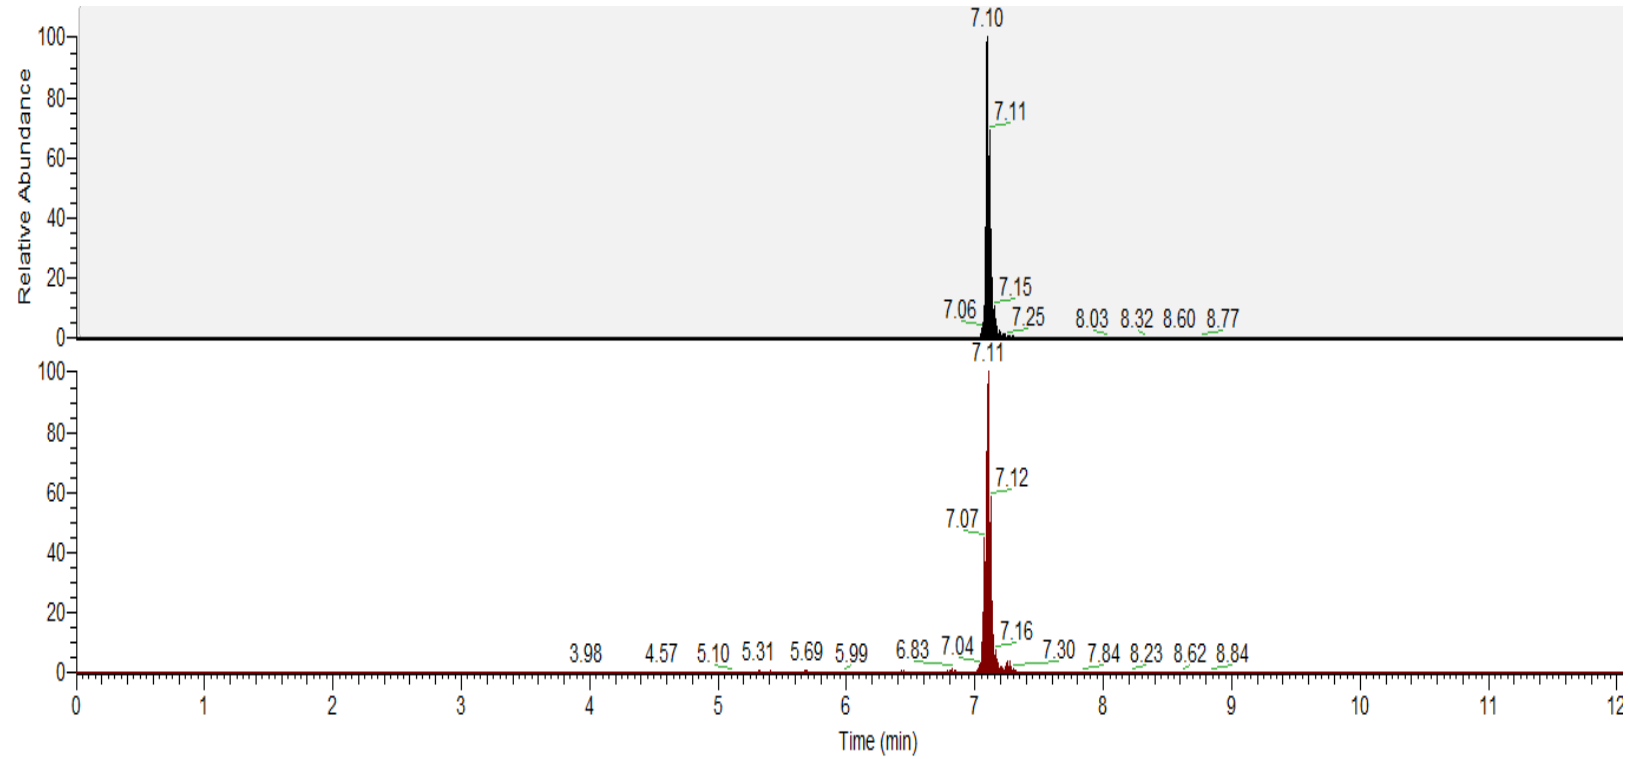**b**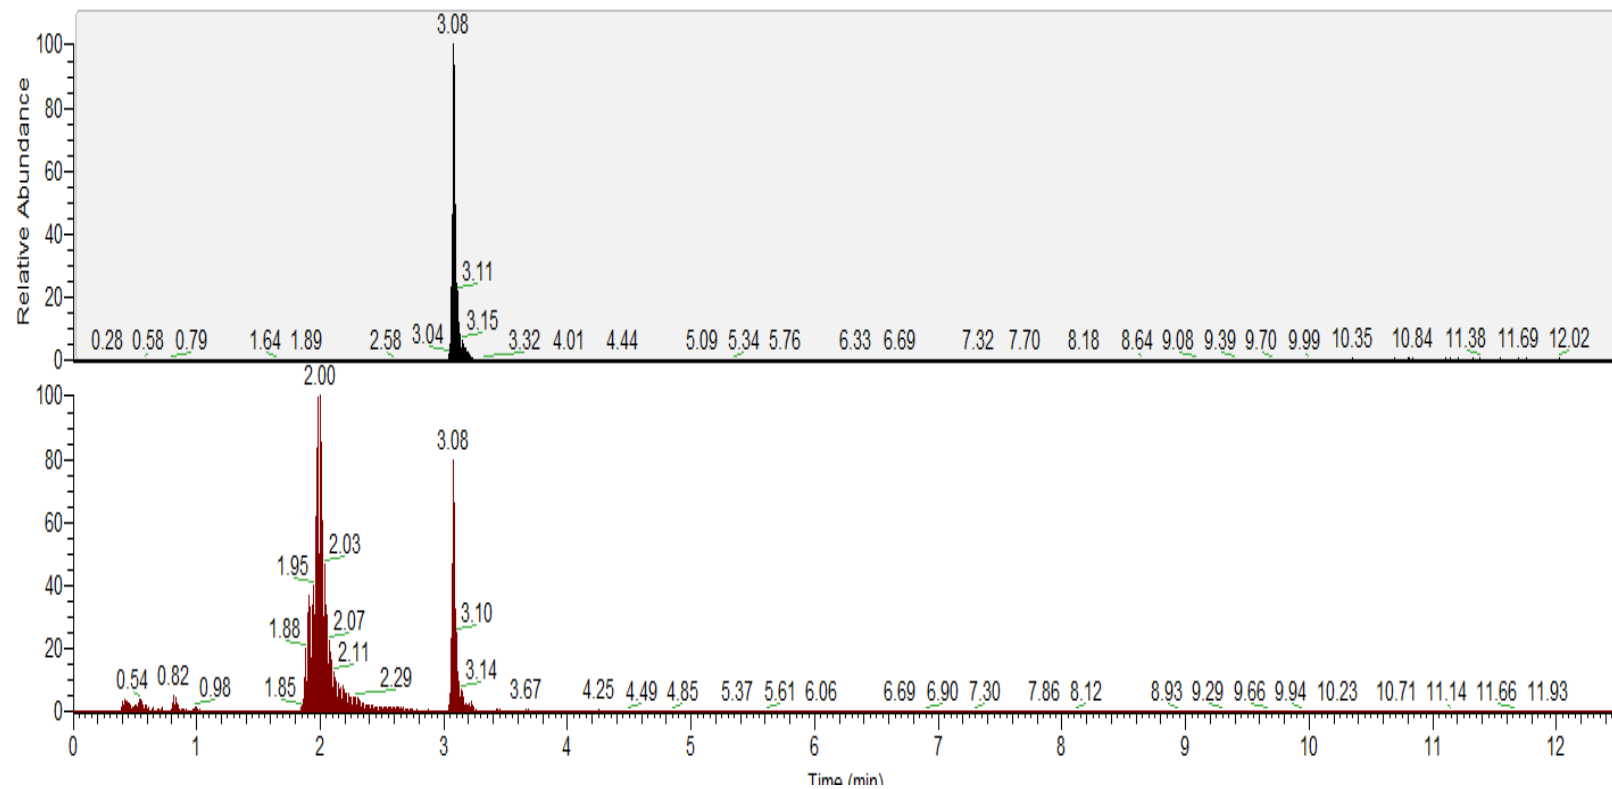

**c**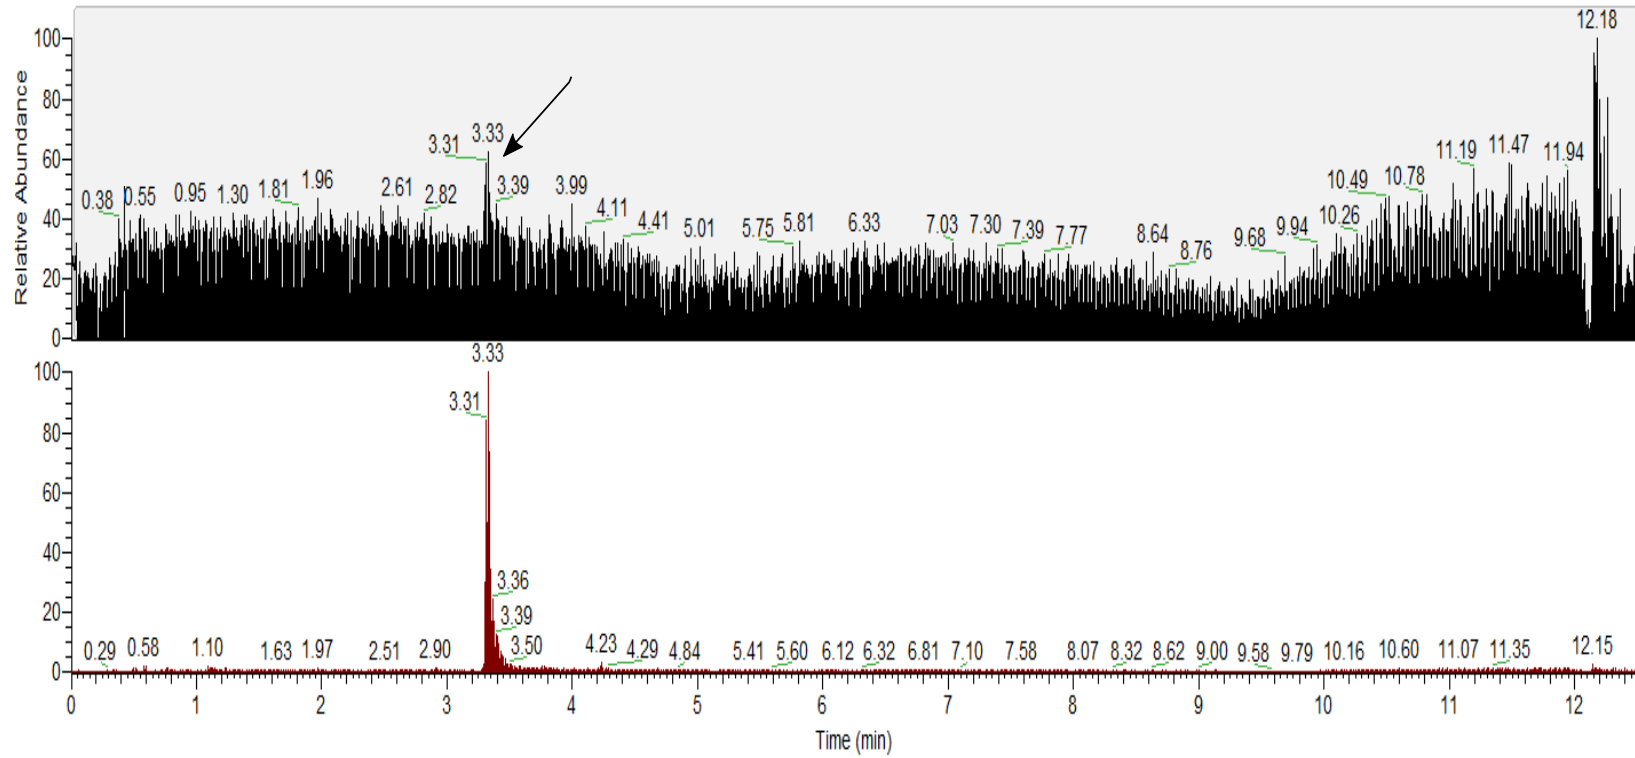**d**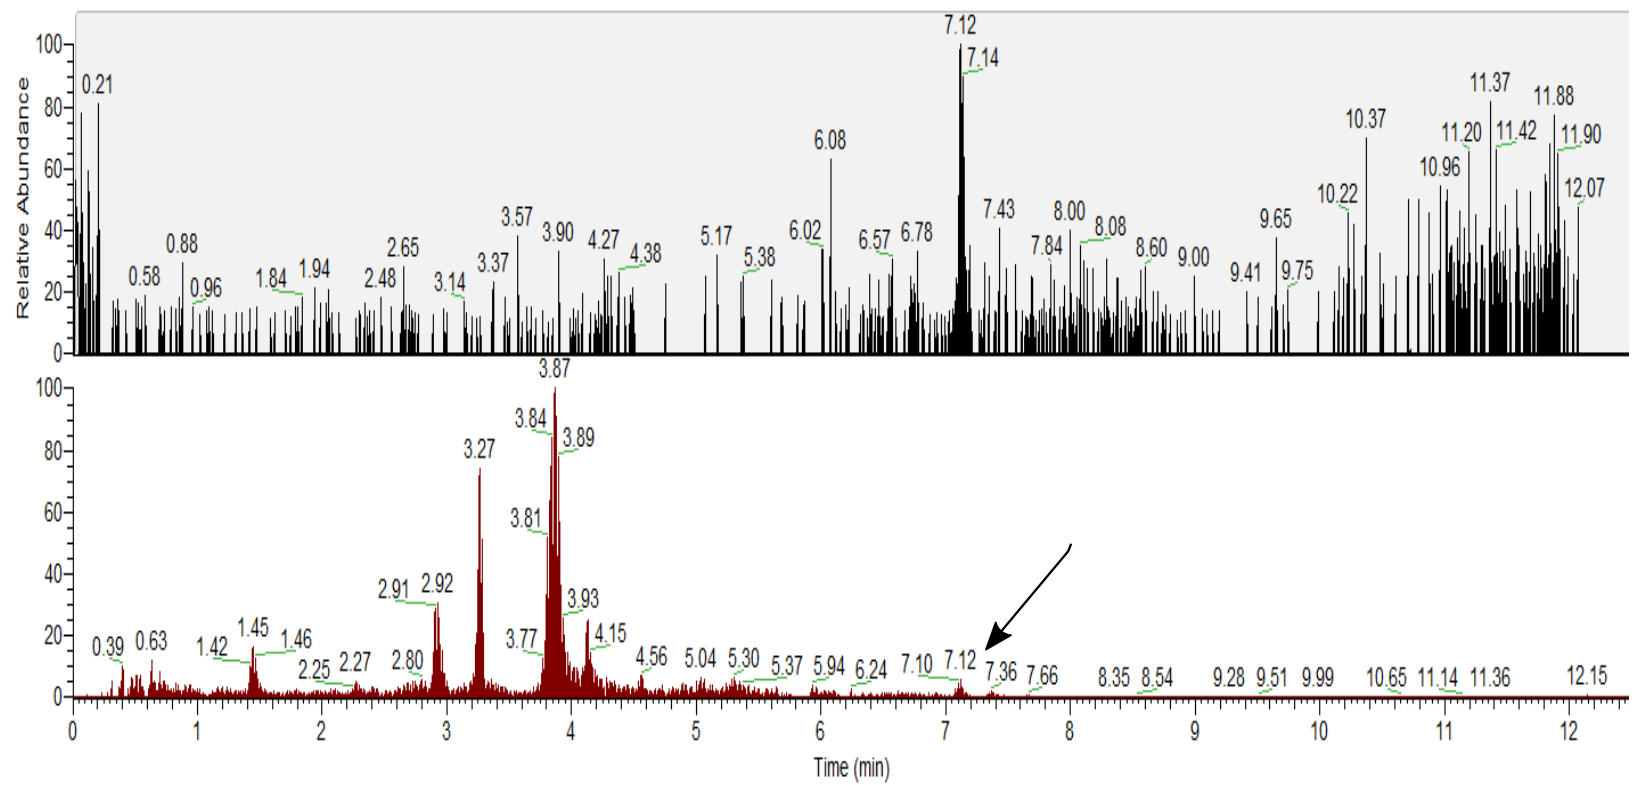

**e**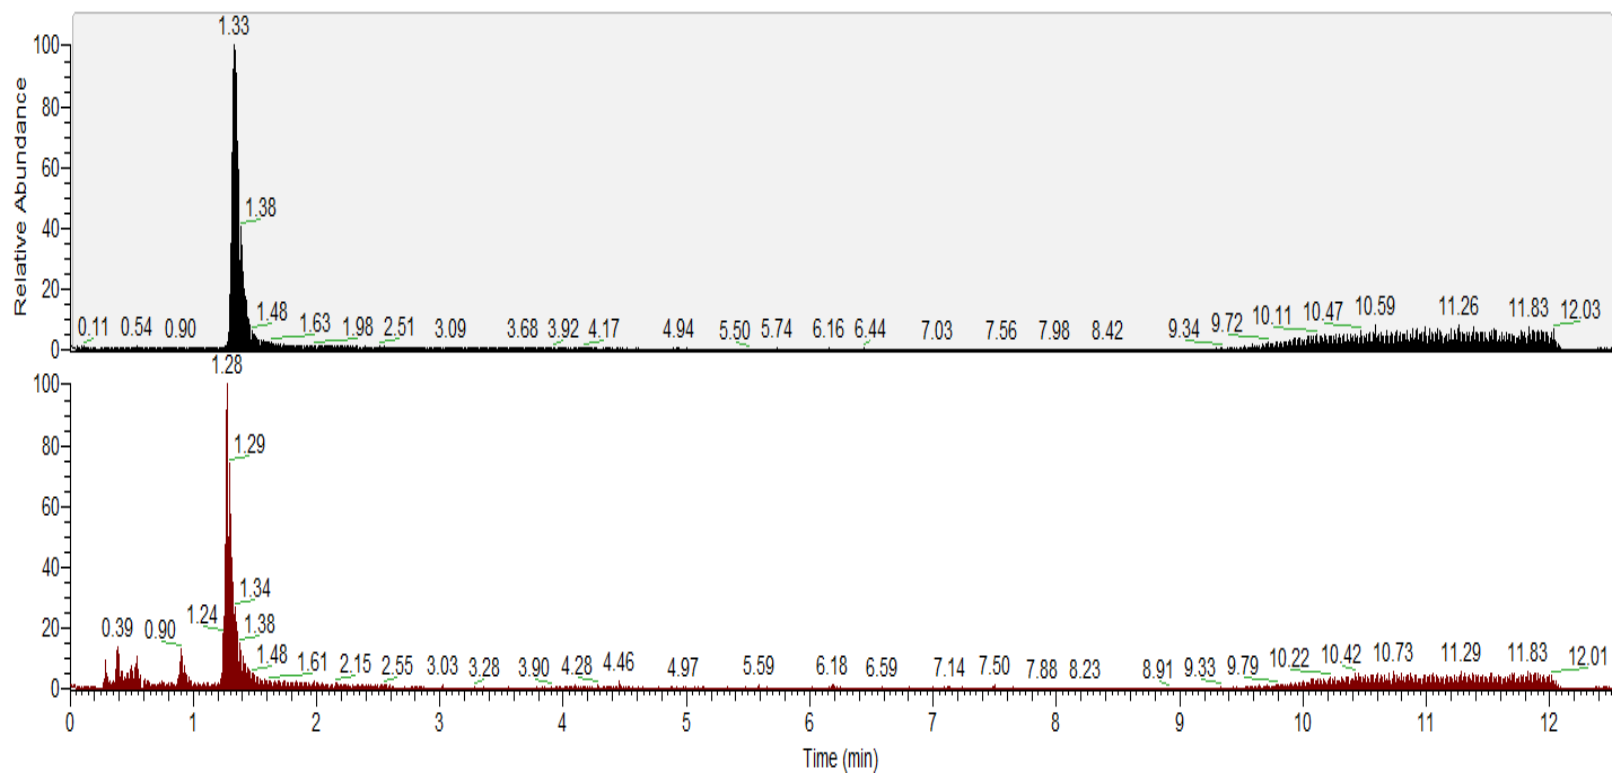**f**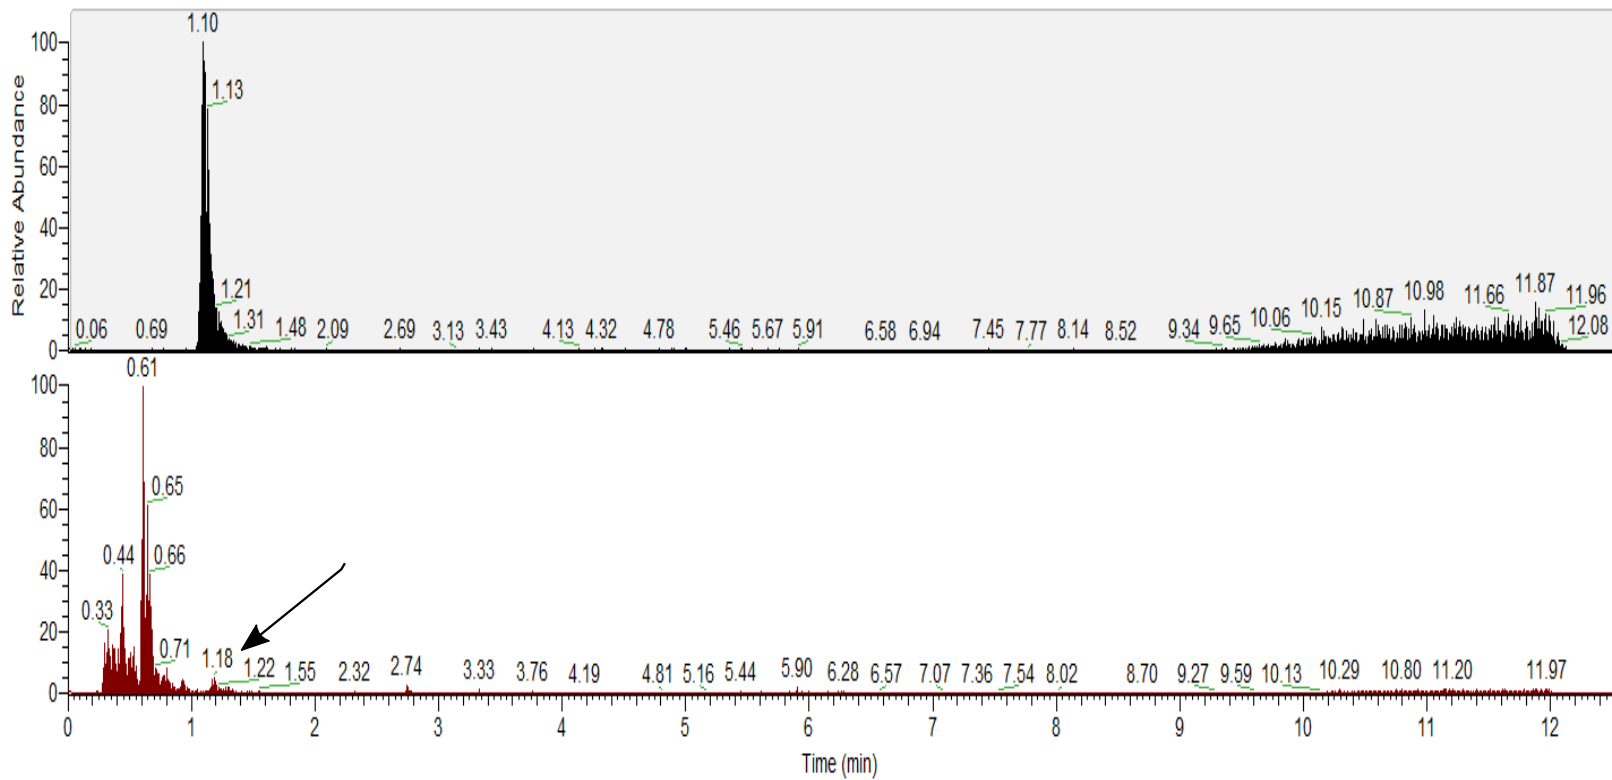

g

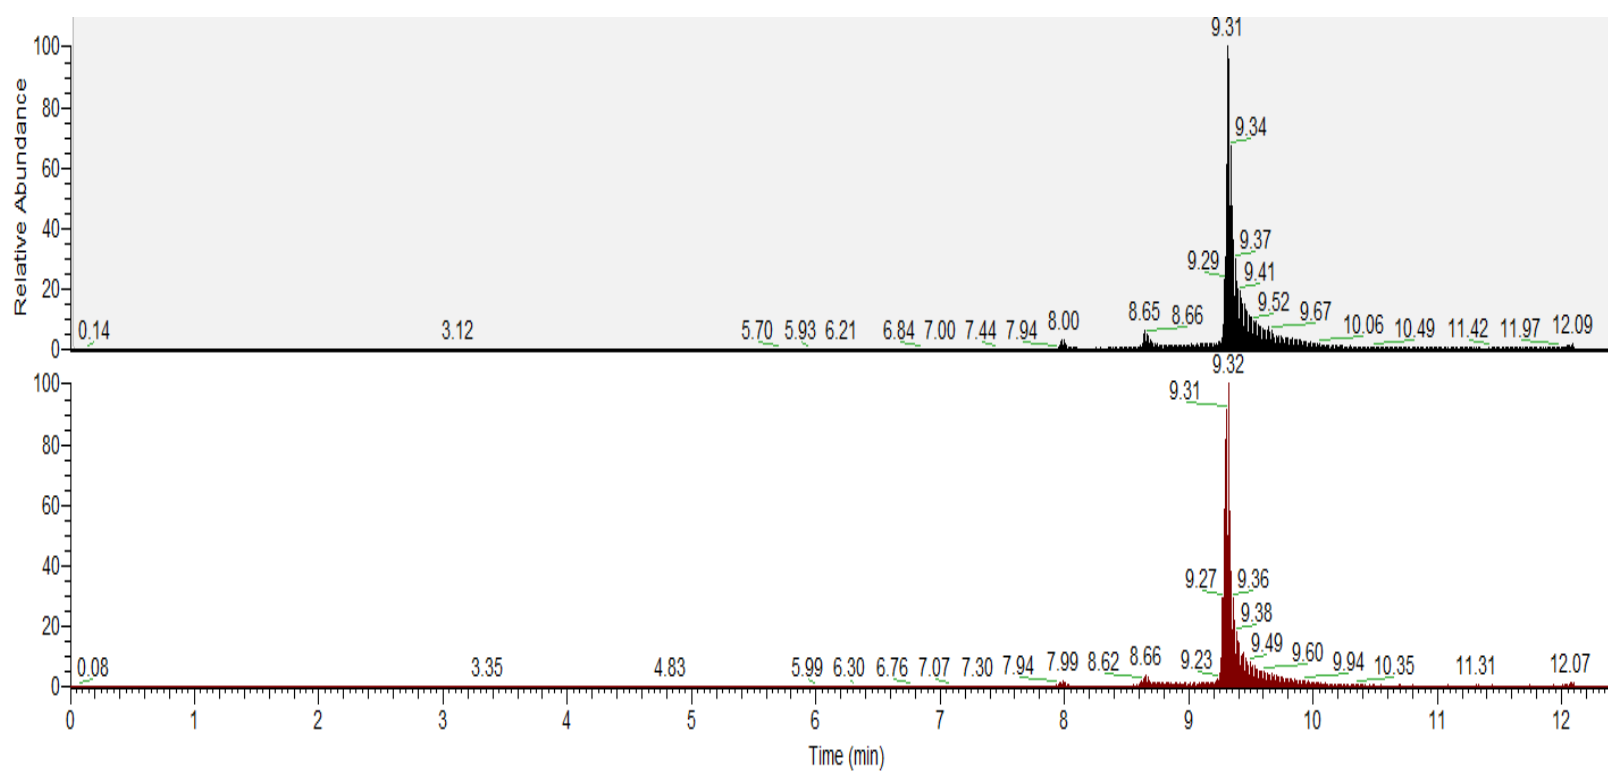

h

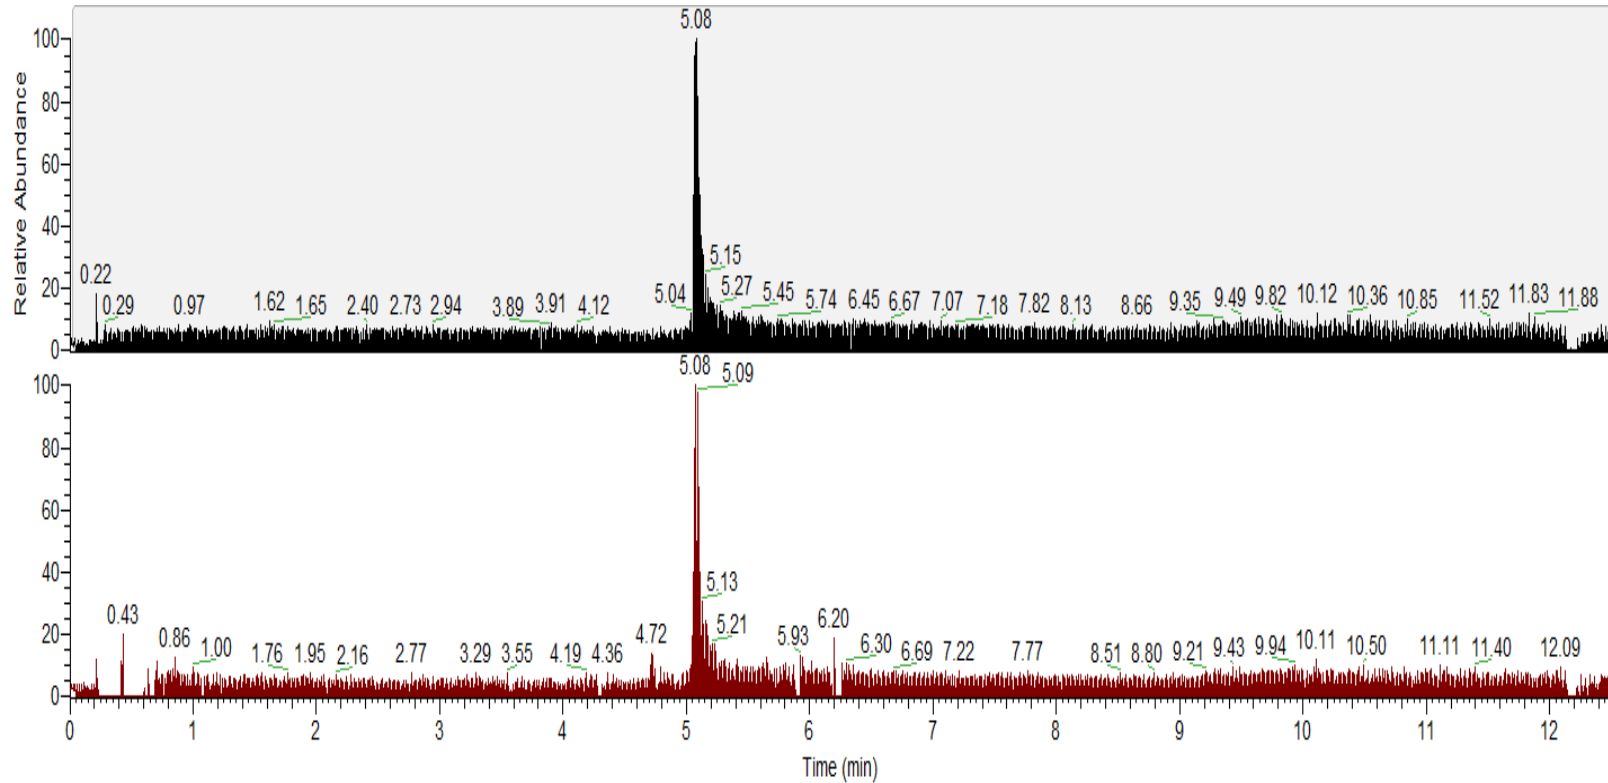

**i**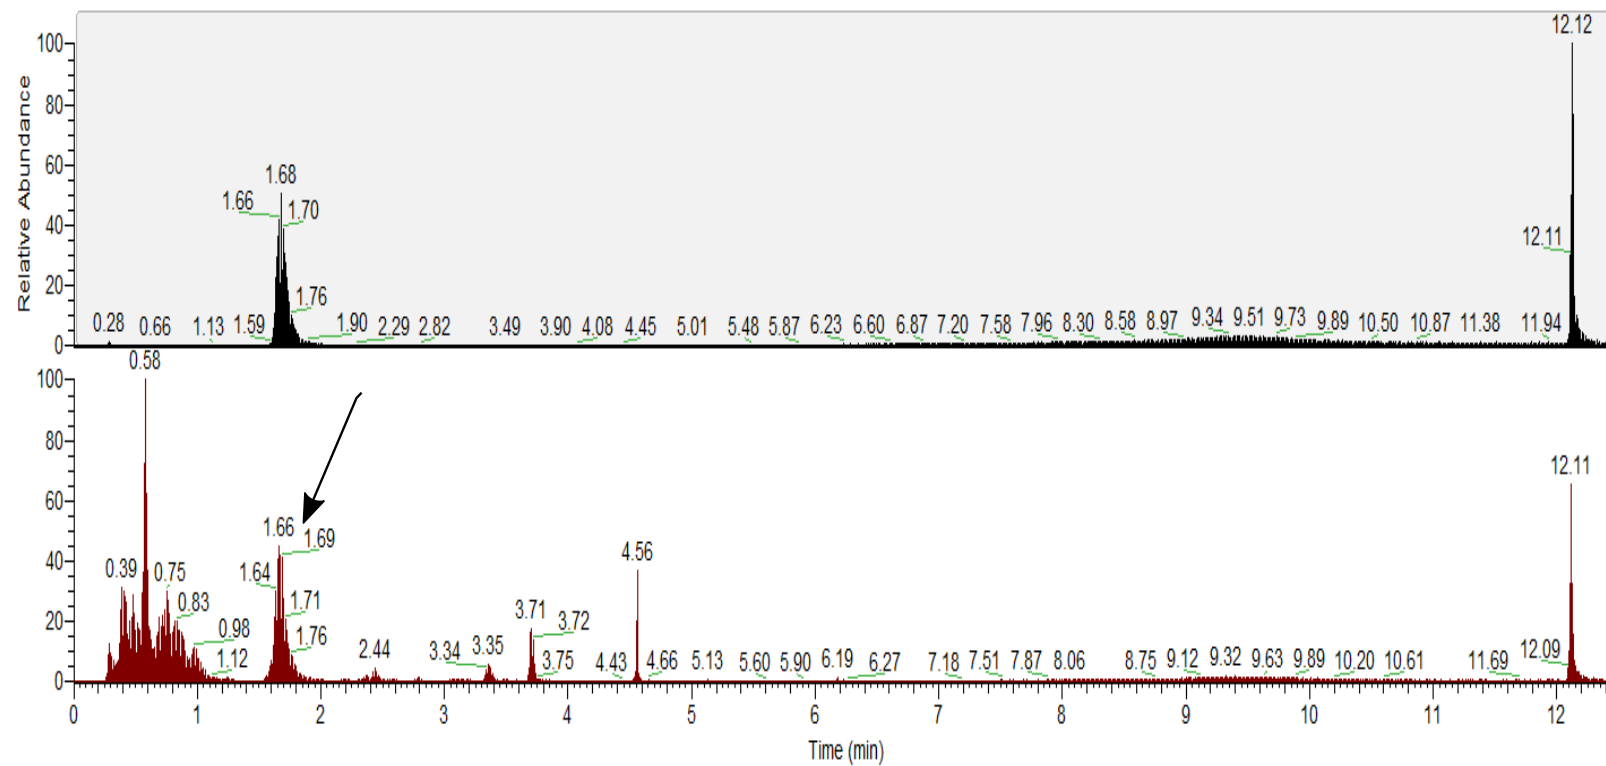**j**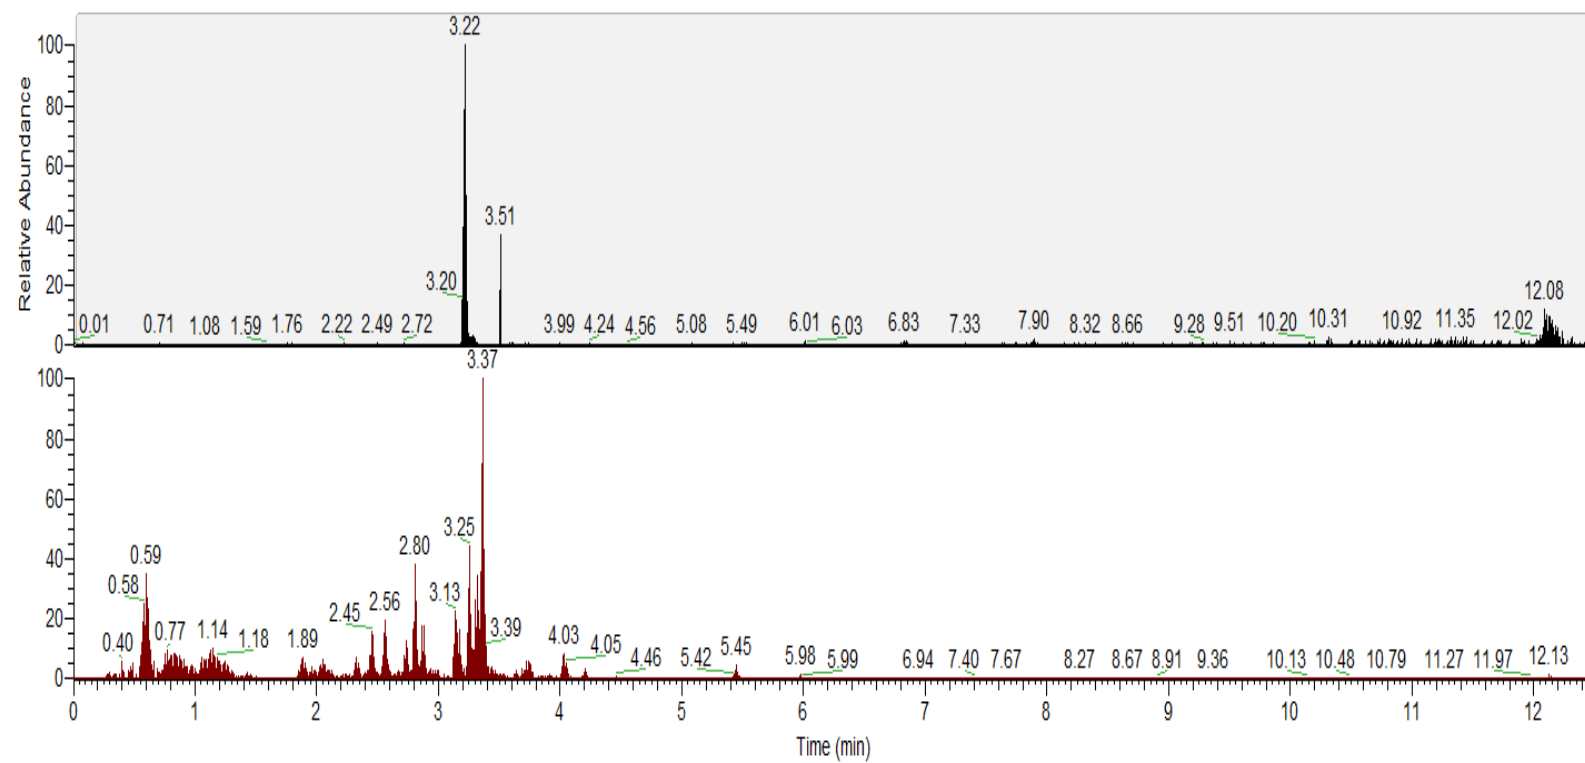

**k**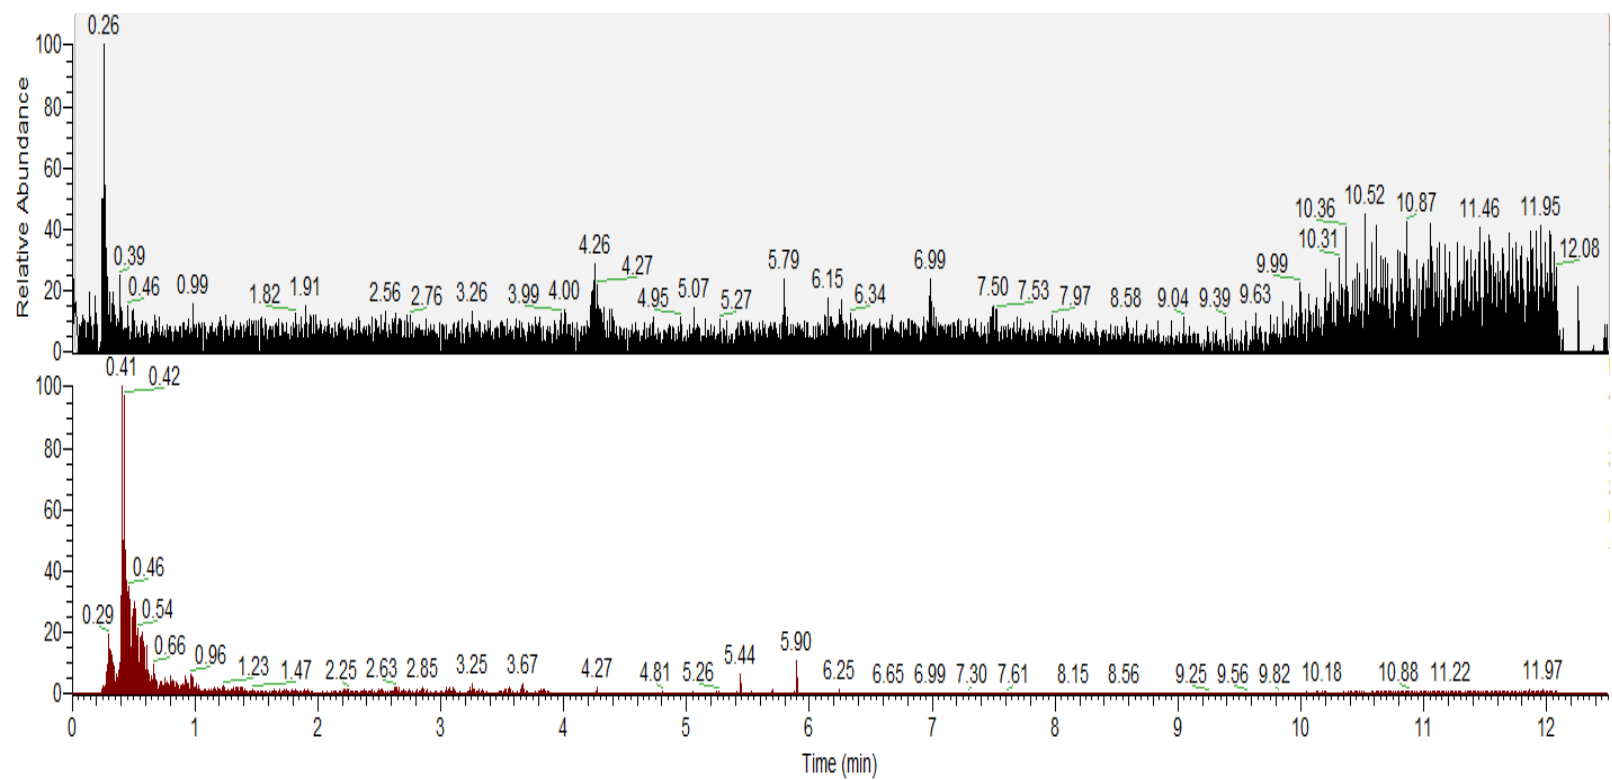**l**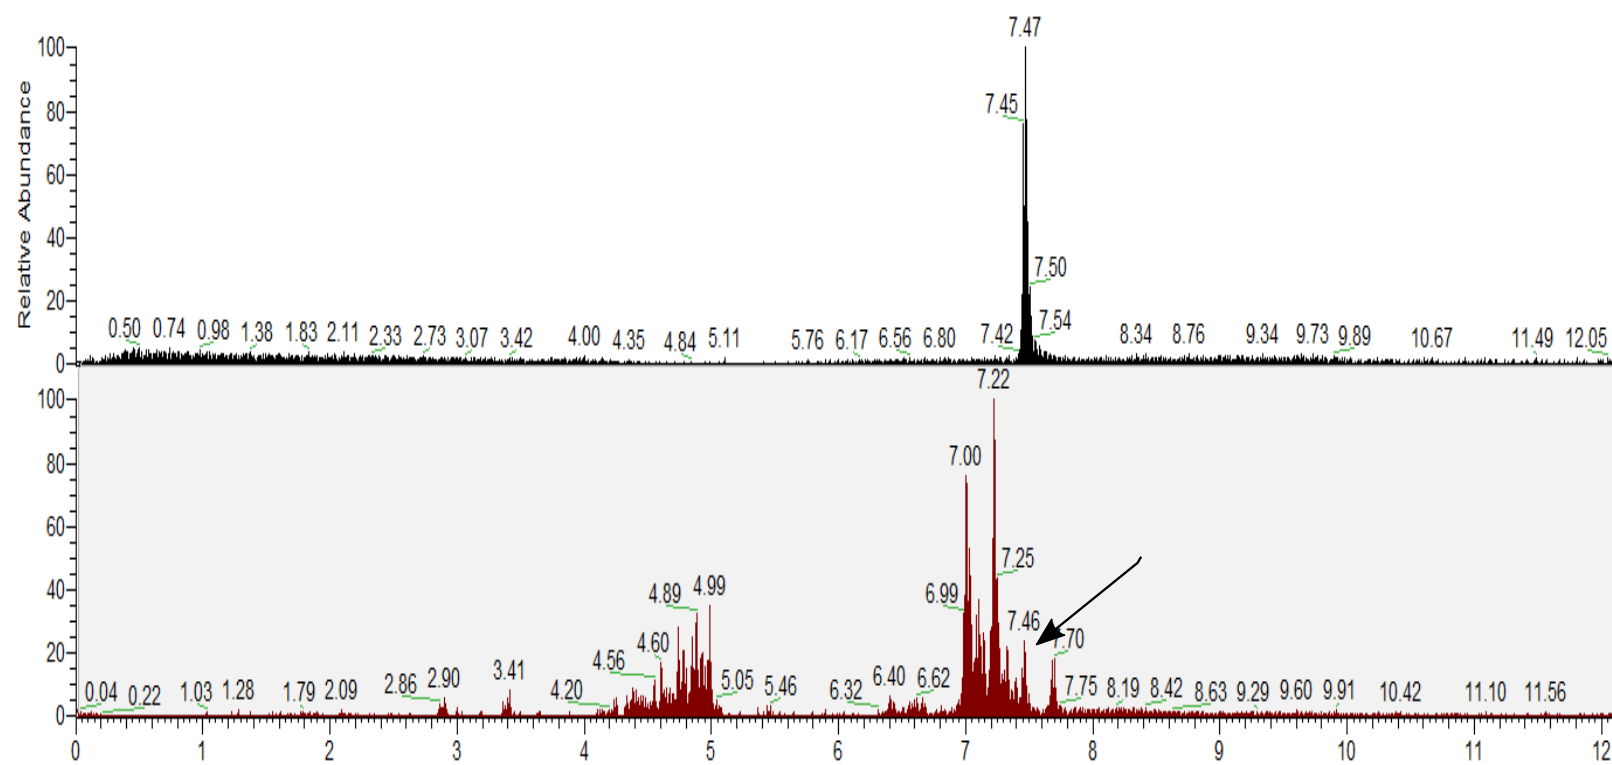

**m**

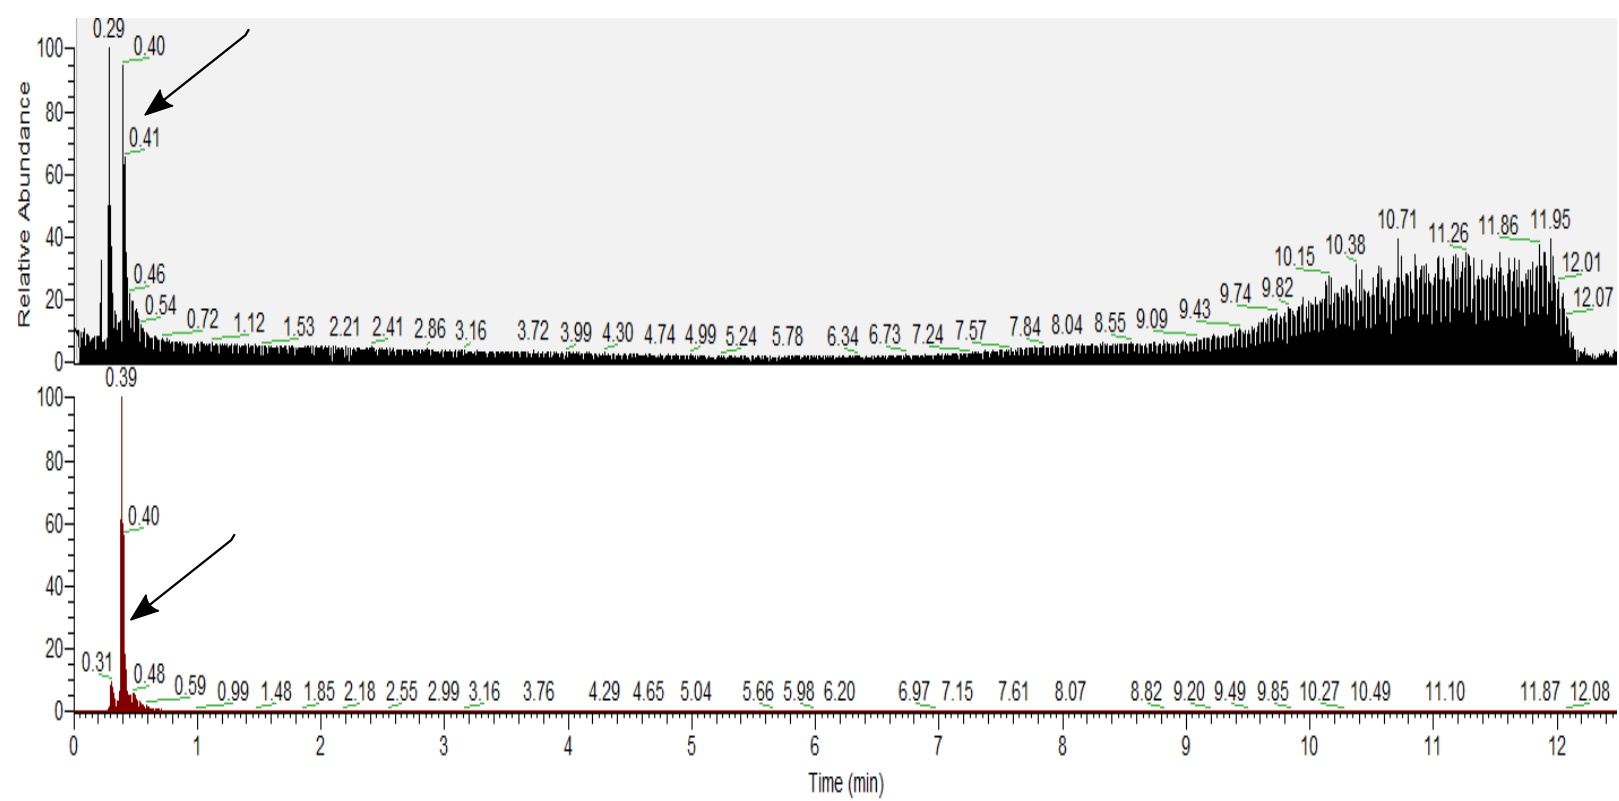

Supplement: msystems.00710-22-s0004.pdf [file msystems.00710-22-s0004.pdf]
