# Supplementary material for: Untargeted Fecal Metabolomic Analyses across an Industrialization Gradient Reveal Shared Metabolites and Impact of Industrialization on Fecal Microbiome-Metabolome Interactions
Source: PubMed Central journal article supplement (PMC9765122; doi:10.1128/msystems.00710-22), 2022-11-23
Supplement: msystems.00710-22-s0005.pdf [file msystems.00710-22-s0005.pdf]

| <b>SampleID</b> | <b>Population</b> | <b>Industrialization Category</b> | <b>Sex</b> | <b>Age</b> |
|-----------------|-------------------|-----------------------------------|------------|------------|
| NO01            | Norman            | Urban Industrial                  | M          | 23         |
| NO02            | Norman            | Urban Industrial                  | F          | 37         |
| NO03            | Norman            | Urban Industrial                  | M          | 40         |
| NO04            | Norman            | Urban Industrial                  | M          | 26         |
| NO05            | Norman            | Urban Industrial                  | M          | 28         |
| NO06            | Norman            | Urban Industrial                  | M          | 28         |
| NO07            | Norman            | Urban Industrial                  | F          | 32         |
| NO08            | Norman            | Urban Industrial                  | F          | 32         |
| NO09            | Norman            | Urban Industrial                  | F          | 34         |
| NO10            | Norman            | Urban Industrial                  | M          | 41         |
| NO11            | Norman            | Urban Industrial                  | M          | 26         |
| NO12            | Norman            | Urban Industrial                  | F          | 27         |
| NO13            | Norman            | Urban Industrial                  | M          | 35         |
| NO19            | Norman            | Urban Industrial                  | F          | 32         |
| NO20            | Norman            | Urban Industrial                  | M          | 26         |
| NO21            | Norman            | Urban Industrial                  | M          | 23         |
| NO22            | Norman            | Urban Industrial                  | M          | 26         |
| NO23            | Norman            | Urban Industrial                  | F          | 26         |
| GU1             | Guayabo           | Rural Industrial                  | F          | 52         |
| GU2             | Guayabo           | Rural Industrial                  | F          | 19         |
| GU4             | Guayabo           | Rural Industrial                  | F          | 40         |
| GU6             | Guayabo           | Rural Industrial                  | NA         | 6          |
| GU7             | Guayabo           | Rural Industrial                  | NA         | 9          |
| GU10            | Guayabo           | Rural Industrial                  | F          | 58         |
| GU11            | Guayabo           | Rural Industrial                  | NA         | 7          |
| GU12            | Guayabo           | Rural Industrial                  | NA         | 16         |
| GU13            | Guayabo           | Rural Industrial                  | F          | 41         |
| GU17            | Guayabo           | Rural Industrial                  | F          | 51         |
| GU19            | Guayabo           | Rural Industrial                  | F          | 24         |
| GU20            | Guayabo           | Rural Industrial                  | F          | 63         |
| 1TM             | Tambo de Mora     | Rural Industrial                  | F          | 61         |
| 2TM             | Tambo de Mora     | Rural Industrial                  | F          | 40         |
| 3TM             | Tambo de Mora     | Rural Industrial                  | NA         | 5          |
| 4TM             | Tambo de Mora     | Rural Industrial                  | F          | 40         |
| 6TM             | Tambo de Mora     | Rural Industrial                  | F          | 31         |

|         |               |                   |    |    |
|---------|---------------|-------------------|----|----|
| 10TM    | Tambo de Mora | Rural Industrial  | NA | 8  |
| 11TM    | Tambo de Mora | Rural Industrial  | M  | 39 |
| 14TM    | Tambo de Mora | Rural Industrial  | F  | 77 |
| 16TM    | Tambo de Mora | Rural Industrial  | F  | 38 |
| 17TM    | Tambo de Mora | Rural Industrial  | NA | 7  |
| 18TM    | Tambo de Mora | Rural Industrial  | NA | 13 |
| 26TM    | Tambo de Mora | Rural Industrial  | F  | 36 |
| 27TM    | Tambo de Mora | Rural Industrial  | NA | 13 |
| 31TM    | Tambo de Mora | Rural Industrial  | NA | 28 |
| TM10_01 | Boulkiemdé    | Rural Traditional | M  | 55 |
| TM13_01 | Boulkiemdé    | Rural Traditional | M  | 53 |
| TM23_02 | Boulkiemdé    | Rural Traditional | F  | 51 |
| TM01_01 | Boulkiemdé    | Rural Traditional | M  | 55 |
| TM09_02 | Boulkiemdé    | Rural Traditional | F  | 32 |
| TM11_04 | Boulkiemdé    | Rural Traditional | F  | 40 |
| TM17_02 | Boulkiemdé    | Rural Traditional | F  | 35 |
| TM20_03 | Boulkiemdé    | Rural Traditional | F  | 37 |
| TM22_03 | Boulkiemdé    | Rural Traditional | M  | 29 |
| TM25_03 | Boulkiemdé    | Rural Traditional | F  | 38 |
| TM29_01 | Boulkiemdé    | Rural Traditional | M  | 73 |
| HCO01   | Tunapuco      | Rural Traditional | F  | 36 |
| HCO03   | Tunapuco      | Rural Traditional | M  | 6  |
| HCO09   | Tunapuco      | Rural Traditional | NA | 13 |
| HCO10   | Tunapuco      | Rural Traditional | M  | 10 |
| HCO11   | Tunapuco      | Rural Traditional | M  | 36 |
| HCO12   | Tunapuco      | Rural Traditional | F  | 35 |
| HCO13   | Tunapuco      | Rural Traditional | F  | 9  |
| HCO14   | Tunapuco      | Rural Traditional | F  | 34 |
| HCO15   | Tunapuco      | Rural Traditional | F  | 63 |
| HCO16   | Tunapuco      | Rural Traditional | NA | 11 |
| HCO17   | Tunapuco      | Rural Traditional | F  | 7  |
| HCO18   | Tunapuco      | Rural Traditional | M  | 11 |
| HCO21   | Tunapuco      | Rural Traditional | M  | 10 |
| HCO41   | Tunapuco      | Rural Traditional | NA | 54 |
| HCO53   | Tunapuco      | Rural Traditional | F  | 44 |
| HCO61   | Tunapuco      | Rural Traditional | F  | 20 |
| HCO63   | Tunapuco      | Rural Traditional | F  | 6  |
| HCO66   | Tunapuco      | Rural Traditional | M  | 11 |

|       |          |                      |    |    |
|-------|----------|----------------------|----|----|
| HCO67 | Tunapuco | Rural Traditional    | F  | 26 |
| HCO68 | Tunapuco | Rural Traditional    | M  | 7  |
| HCO69 | Tunapuco | Rural Traditional    | NA | 9  |
| HCO70 | Tunapuco | Rural Traditional    | F  | 40 |
| HCO72 | Tunapuco | Rural Traditional    | F  | 5  |
| HCO74 | Tunapuco | Rural Traditional    | F  | 36 |
| SM01  | Matses   | Isolated Traditional | M  | 30 |
| SM02  | Matses   | Isolated Traditional | F  | 25 |
| SM03  | Matses   | Isolated Traditional | M  | 10 |
| SM10  | Matses   | Isolated Traditional | F  | 6  |
| SM23  | Matses   | Isolated Traditional | M  | 7  |
| SM28  | Matses   | Isolated Traditional | F  | 52 |
| SM29  | Matses   | Isolated Traditional | F  | 50 |
| SM33  | Matses   | Isolated Traditional | F  | 5  |
| SM37  | Matses   | Isolated Traditional | M  | 12 |
| SM39  | Matses   | Isolated Traditional | F  | 40 |
| SM41  | Matses   | Isolated Traditional | M  | 6  |
