# Supplementary material for: Untargeted Fecal Metabolomic Analyses across an Industrialization Gradient Reveal Shared Metabolites and Impact of Industrialization on Fecal Microbiome-Metabolome Interactions
Source: PubMed Central journal article supplement (PMC9765122; doi:10.1128/msystems.00710-22), 2022-11-23
Supplement: msystems.00710-22-s0006.pdf [file msystems.00710-22-s0006.pdf]

| Compound Name                          | <i>m/z</i> | RT (min) | Cosine Score | Detected in 6-sample filtering | Detected in half-sample filtering | Detected in all-sample filtering | Predicted ClassyFire Class              | Description derived from PubChem and HMDB                         | Present in Human Fecal Metabolome Database | ReDU Chemical Explorer Associations                                                                                          |
|----------------------------------------|------------|----------|--------------|--------------------------------|-----------------------------------|----------------------------------|-----------------------------------------|-------------------------------------------------------------------|--------------------------------------------|------------------------------------------------------------------------------------------------------------------------------|
| Hypoxanthine                           | 137.046    | 0.39     | 0.98         | Yes                            | Yes                               | No                               | -                                       | Purine derivative associated with inosine and uric acid in humans | Yes                                        | Found in bacterial cultures ( <i>Clostridium orbiscindens</i> CC43_001K)                                                     |
| Nicotinamide N-oxide                   | 139.05     | 0.31     | 1            | Yes                            | No                                | No                               | -                                       | Precursor to nicotinamide-adenine dinucleotide (NAD+) in animals  | No (found in blood)                        | Associated with <i>Staphylococcus lugdunensis</i> . Found in human skin, saliva, and fecal samples                           |
| 3-methyl-2-oxindole (3-Methyloxindole) | 148.076    | 3.22     | 0.93         | Yes                            | No                                | No                               | Indoles and derivatives (55.56%)        | Endogenous product of 3-methylindole                              | No                                         | Found in bacterial cultures ( <i>Gardnerella vaginalis</i> and <i>Collinsella</i> sp. 4_8_47FAA)                             |
| Hyocholic acid                         | 158.154    | 4.78     | 0.83         | Yes                            | Yes                               | No                               | Steroids and steroid derivatives (100%) | Mammalian bile acid                                               | Yes                                        | Largely found in bacterial culture and humans                                                                                |
| Gly-Val (Glycylvaline)                 | 175.107    | 0.36     | 0.91         | Yes                            | Yes                               | Yes                              | -                                       | Glycine and valine dipeptide                                      | Yes                                        | Found in bacterial cultures, associated with <i>Staphylococcus aureus</i> . Also associated with inflammatory bowel disease. |

|                                                    |         |      |      |     |     |    |                                        |                                                                                                                                                  |     |                                                                                                                                                                     |
|----------------------------------------------------|---------|------|------|-----|-----|----|----------------------------------------|--------------------------------------------------------------------------------------------------------------------------------------------------|-----|---------------------------------------------------------------------------------------------------------------------------------------------------------------------|
| 3-Hydroxy-4-methoxycinnamic acid (Isoferulic acid) | 177.055 | 4.13 | 0.97 | Yes | Yes | No | Cinnamic acids and derivatives (9.09%) | Endogenous human metabolite; Also potential biomarker for coffee, wheat, sunflowers, etc.                                                        | Yes | Predominantly found in plant, food (such as fruits), and beverage samples. Also found in human caecum and fecal samples.                                            |
| 2-Butanone, 4-(2,6,6-trimethyl-2-cyclohexen-1-yl)  | 177.164 | 3.15 | 0.83 | Yes | No  | No | -                                      | Also known as 3 $\alpha$ ,7 $\alpha$ ,12 $\alpha$ -trihydroxycholestanic acid (THCA); Intermediate bile acid associated with metabolic disorders | No  | Predominantly found in plant samples ( <i>Cucumis melo</i> ), bacterial culture ( <i>Bacteroides dorei</i> ; <i>Propionibacterium acnes</i> ), and fungal cultures. |
| Paraxanthine                                       | 181.072 | 0.81 | 0.94 | Yes | Yes | No | Imidazopyrimidines (21.74%)            | Primary metabolite of caffeine; Found in animals and some bacteria                                                                               | Yes | Not in Chemical Explorer                                                                                                                                            |

|                          |         |      |      |     |     |    |                                        |                                                                |     |                                                                                                         |
|--------------------------|---------|------|------|-----|-----|----|----------------------------------------|----------------------------------------------------------------|-----|---------------------------------------------------------------------------------------------------------|
| trans-Ferulic acid       | 195.065 | 3.01 | 0.91 | Yes | Yes | No | Cinnamic acids and derivatives (9.09%) | Abundant in plant cell walls                                   | Yes | Predominantly found in plant, food, and beverage samples. Also found in human fecal and caecum samples. |
| Loliolide                | 197.117 | 3.11 | 0.94 | Yes | Yes | No | Benzofurans (13.79%)                   | Plant metabolite                                               | No  | Found in environmental and plant samples ( <i>Cucumis melo</i> )                                        |
| 3-Hydroxydodecanoic acid | 199.169 | 5.35 | 0.99 | Yes | Yes | No | Lactones (20%)                         | Medium-chain fatty acid                                        | Yes | Found in environmental samples, plant samples, and some human feces                                     |
| N-Acetyl-D-mannosamine   | 204.087 | 3.27 | 0.91 | Yes | No  | No | -                                      | Bacterial metabolite; Precursor to <i>N</i> -acetylmannosamine | Yes | Found in a fungal culture (species not specified)                                                       |

|                           |         |      |      |     |     |     |                                           |                                                                                       |     |                                                                                                                                                                                                                                        |
|---------------------------|---------|------|------|-----|-----|-----|-------------------------------------------|---------------------------------------------------------------------------------------|-----|----------------------------------------------------------------------------------------------------------------------------------------------------------------------------------------------------------------------------------------|
| N-acetyl-L-Phenylalanine  | 208.097 | 2.84 | 0.95 | Yes | Yes | No  | Carboxylic acids and derivatives (10.39%) | Metabolite of phenylalanine; Frequently found in urine of humans with phenylketonuria | Yes | Found in bacterial ( <i>Fusobacterium ulcerans</i> 12-1B, <i>Sutterella wadsworthensis</i> HGA0223, etc.) and some fungal cultures                                                                                                     |
| Thr-Pro (Threonylproline) | 217.122 | 0.46 | 0.96 | Yes | Yes | No  | -                                         | Threonine and proline dipeptide                                                       | No  | Found in bacterial culture, fungal culture, and animal samples (e.g., mice, rats, humans, etc.). Found in human fecal samples. Associated with inflammatory bowel disease samples. Also associated with <i>Staphylococcus aureus</i> . |
| Val-Val (Valylvaline)     | 217.155 | 0.45 | 0.97 | Yes | Yes | Yes | Carboxylic acids and derivatives (12.86%) | Valine and valine dipeptide                                                           | Yes | Found in fungal cultures and human fecal samples.                                                                                                                                                                                      |

|                                      |                |             |             |            |           |           |   |                                                                                                  |            |                                                                                                                                                                                                                                                                                                                                                                                                        |
|--------------------------------------|----------------|-------------|-------------|------------|-----------|-----------|---|--------------------------------------------------------------------------------------------------|------------|--------------------------------------------------------------------------------------------------------------------------------------------------------------------------------------------------------------------------------------------------------------------------------------------------------------------------------------------------------------------------------------------------------|
| Abrine                               | 219.113        | 0.60        | 0.88        | Yes        | Yes       | No        | - | Associated with <i>Escherichia coli</i> metabolism                                               | No         | Found in food, beverage, plant, animal, fungal culture, and bacterial culture samples. Also found in human digestive tract, fecal, heart, caecum, skin, and blood samples. Found equally in human rural and urban samples. Associated with many different bacterial species (e.g., <i>Parabacteroides goldsteinii</i> CC87F, <i>Prevotella nigrescens</i> CC14M, <i>Bifidobacterium longum</i> , etc.) |
| <b>Pantothenic acid</b>              | <b>220.118</b> | <b>0.56</b> | <b>0.81</b> | <b>Yes</b> | <b>No</b> | <b>No</b> | - | <b>Also called Vitamin B5; essential metabolite for carbohydrate, protein, and fat synthesis</b> | <b>Yes</b> | <b>Found in animal (human, mouse, rat, etc.) and environmental samples.</b>                                                                                                                                                                                                                                                                                                                            |
| PyroGlu-Pro<br>(Pyroglutamylproline) | 227.103        | 0.44        | 0.86        | Yes        | Yes       | Yes       | - | No information provided                                                                          | No         | Predominantly found in bacterial cultures ( <i>Prevotella nigrescens</i> , <i>Bacteroides stercoris</i> CC31F, etc.), plant, and human fecal samples                                                                                                                                                                                                                                                   |

|                                                   |                |             |             |            |            |            |   |                                                                                                                                                           |                               |                                                                                                                                                                   |
|---------------------------------------------------|----------------|-------------|-------------|------------|------------|------------|---|-----------------------------------------------------------------------------------------------------------------------------------------------------------|-------------------------------|-------------------------------------------------------------------------------------------------------------------------------------------------------------------|
| Myristoleic acid                                  | 227.201        | 5.94        | 0.94        | Yes        | Yes        | Yes        | - | Long-chain fatty acid found in all eukaryotes; Potential biomarker for some dairy products and other food (anchovies, dates, sunflowers, chocolate, etc.) | Yes                           | Predominantly found in environmental samples, such as soil.                                                                                                       |
| Ile-Pro (Isoleucylproline)                        | 229.155        | 0.7         | 0.98        | Yes        | No         | No         | - | Isoleucine and Proline dipeptide                                                                                                                          | No (found in blood and sweat) | Predominantly found in bacterial (e.g., <i>Prevotella denticola</i> ; <i>Bacteroides stercoris</i> ; <i>Parabacteroides johnsonii</i> , etc.) and fungal cultures |
| Val-Ile (Valylisoleucine)                         | 231.171        | 2.82        | 0.88        | Yes        | Yes        | Yes        | - | Valine and Isoleucine dipeptide                                                                                                                           | Yes                           | Found in fungal cultures                                                                                                                                          |
| <b>cis-9-Hexadecenoic acid (Palmitoleic acid)</b> | <b>237.221</b> | <b>6.49</b> | <b>0.97</b> | <b>Yes</b> | <b>Yes</b> | <b>Yes</b> | - | <b>Unsaturated fatty acid</b>                                                                                                                             | <b>Yes</b>                    | <b>Predominantly found in soil samples</b>                                                                                                                        |
| Gly-Tyr (Glycyltyrosine)                          | 239.102        | 0.44        | 0.95        | Yes        | Yes        | No         | - | Glycine and tyrosine dipeptide                                                                                                                            | Yes                           | Found in bacterial cultures (e.g., <i>Parvimonas micra</i> , <i>Fusobacterium nucleatum</i> , etc.)                                                               |

|                         |         |      |      |     |     |     |                                           |                                                     |     |                                                                                                                                                                                                       |
|-------------------------|---------|------|------|-----|-----|-----|-------------------------------------------|-----------------------------------------------------|-----|-------------------------------------------------------------------------------------------------------------------------------------------------------------------------------------------------------|
| Biotin                  | 245.098 | 2.39 | 0.87 | Yes | No  | No  | Biotin and derivatives (16.67%)           | Also called vitamin H; essential human metabolite   | Yes | Found in environmental, animal, and bacterial culture (e.g., <i>Escherichia coli</i> , <i>Staphylococcus aureus</i> , etc.) samples. Also found in human nasal cavity, skin, and saliva samples.      |
| Leu-Leu (Leucylleucine) | 245.186 | 2.40 | 0.98 | Yes | Yes | Yes | Carboxylic acids and derivatives (12.86%) | Leucine and leucine dipeptide                       | Yes | Predominantly found in bacterial cultures ( <i>Bacteroides stercoris</i> CC31F, <i>Clostridium cadaveris</i> CC44_001G, etc.) and fungal cultures (not specified). Also found in human fecal samples. |
| Lenticin                | 247.145 | 1.22 | 0.98 | Yes | No  | No  | -                                         | Found in lentil extracts; Possible lentil biomarker | Yes | Found in food, animal, and bacterial culture samples (e.g., <i>Staphylococcus aureus</i> ). Also found in human urine, milk, blood, and saliva samples.                                               |

|                                 |                |             |             |            |           |           |   |                                          |            |                                                                                                                                                                            |
|---------------------------------|----------------|-------------|-------------|------------|-----------|-----------|---|------------------------------------------|------------|----------------------------------------------------------------------------------------------------------------------------------------------------------------------------|
| Val-Met<br>(Valylmethionine)    | 249.126        | 0.56        | 0.95        | Yes        | Yes       | No        | - | Valine and<br>Methionine<br>dipeptide    | Yes        | Not in Chemical Explorer                                                                                                                                                   |
| Ser-Phe<br>(Serylphenylalanine) | 253.118        | 0.79        | 0.93        | Yes        | Yes       | Yes       | - | Serine and<br>phenylalanine<br>dipeptide | Yes        | Found in fungal cultures,<br>bacterial cultures<br>( <i>Bacteroides stercoris</i><br>CC31F, <i>Clostridium</i><br><i>cadaveris</i> CC88A, etc.) and<br>human fecal samples |
| <b>Palmitelaidic acid</b>       | <b>255.232</b> | <b>5.96</b> | <b>0.92</b> | <b>Yes</b> | <b>No</b> | <b>No</b> | - | <b>Trans fatty<br/>acid</b>              | <b>Yes</b> | <b>Found in human colon,<br/>upper digestive tract,<br/>liver, and fecal samples.<br/>Also found in soil samples.</b>                                                      |
| L-Saccharopine                  | 259.129        | 0.31        | 0.78        | Yes        | Yes       | No        | - | Involved in<br>lysine<br>degradation     | Yes        | Found in bacterial culture<br>( <i>Staphylococcus aureus</i><br>JE3) and fungal cultures<br>(not specified)                                                                |



|                                               |                |             |             |            |            |           |                                  |                                                                                                                                             |                        |                                                                                                                                                                                                                         |
|-----------------------------------------------|----------------|-------------|-------------|------------|------------|-----------|----------------------------------|---------------------------------------------------------------------------------------------------------------------------------------------|------------------------|-------------------------------------------------------------------------------------------------------------------------------------------------------------------------------------------------------------------------|
| Phe-Pro<br>(Phenylalanylproline)              | 263.139        | 2.57        | 0.99        | Yes        | Yes        | Yes       | -                                | Phenylalanine<br>and Proline<br>dipeptide                                                                                                   | Yes                    | Predominantly found in<br>bacterial cultures<br>( <i>Bacteroides dorei</i><br>CL03T12C01, <i>Prevotella</i><br><i>histicola</i> , <i>Parabacteroides</i><br><i>goldsteinii</i> CC87F, etc.) and<br>some fungal cultures |
| <b>Conjugated linoleic Acid<br/>(10E,12Z)</b> | <b>263.237</b> | <b>7.52</b> | <b>0.85</b> | <b>Yes</b> | <b>Yes</b> | <b>No</b> | <b>Prenol lipids<br/>(5.36%)</b> | <b>Variation of<br/>conjugated<br/>linoleic acid;<br/>Found in<br/>meat dairy<br/>products of<br/>ruminants;<br/>Dietary<br/>supplement</b> | <b>No</b>              | <b>Found in human digestive<br/>tract, liver, colon, and<br/>feces. Also found in<br/>environmental and fungal<br/>samples.</b>                                                                                         |
| Conjugated linoleic acid<br>(9E,11E)          | 263.237        | 6.68        | 0.92        | Yes        | Yes        | Yes       | Prenol lipids<br>(5.36%)         | Variation of<br>conjugated<br>linoleic acid;<br>Found in meat<br>dairy products<br>of ruminants;<br>Dietary<br>supplement                   | No (found in<br>blood) | Found in environmental<br>samples and fungal<br>cultures. Also found in<br>human upper digestive<br>tract, liver, and feces.                                                                                            |
| Thr-Phe<br>(Threonylphenylalanine)            | 267.134        | 0.48        | 0.94        | Yes        | Yes        | Yes       | -                                | Threonine and<br>Phenylalanine<br>dipeptide                                                                                                 | Yes                    | Found in fungal cultures                                                                                                                                                                                                |
| Pro-Arg (Prolylarginine)                      | 272.171        | 0.32        | 0.72        | Yes        | No         | No        | -                                | Proline and<br>arginine<br>dipeptide                                                                                                        | No                     | Found in a fungal culture<br>(species not specified)                                                                                                                                                                    |

|                                  |         |      |      |     |     |     |                                           |                                                                     |     |                                                                                                                                                                                                                                           |
|----------------------------------|---------|------|------|-----|-----|-----|-------------------------------------------|---------------------------------------------------------------------|-----|-------------------------------------------------------------------------------------------------------------------------------------------------------------------------------------------------------------------------------------------|
| 9-OxoOTrE                        | 275.201 | 4.42 | 0.8  | Yes | Yes | No  | -                                         | Long-chain fatty acid                                               | No  | Found in fungal cultures and plant samples ( <i>Zea mays</i> L. and <i>Cucumis melo</i> )                                                                                                                                                 |
| Phe-Leu<br>(Phenylalanylleucine) | 279.171 | 2.59 | 0.99 | Yes | Yes | Yes | Carboxylic acids and derivatives (12.86%) | Phenylalanine and leucine dipeptide                                 | No  | Found in human upper digestive tract, colon, and fecal samples. Also found in bacterial cultures ( <i>Parabacteroides goldsteinii</i> CC87F, <i>Prevotella nigrescens</i> CC14M, etc.) and fungal cultures (not specified)                |
| Leu-Phe<br>(Leucylphenylalanine) | 279.171 | 3.47 | 0.98 | Yes | Yes | Yes | -                                         | Leucine and phenylalanine dipeptide                                 | Yes | Found in animal, fungal culture, and bacterial culture (e.g., <i>Bacteroides dorei</i> , <i>Staphylococcus aureus</i> , <i>Propionibacterium acidifaciens</i> , etc.) samples. Also found in human intestinal, vaginal, and fecal samples |
| N-Tetracosenoyl-4-sphingenine    | 282.279 | 6.09 | 0.95 | Yes | Yes | No  | Fatty Acyls (11.54%)                      | Ceramide associated with cell physiology and some human pathologies | Yes | Not in Chemical Explorer                                                                                                                                                                                                                  |

|                                |         |      |      |     |     |     |                                          |                                                                      |     |                                                                                                   |
|--------------------------------|---------|------|------|-----|-----|-----|------------------------------------------|----------------------------------------------------------------------|-----|---------------------------------------------------------------------------------------------------|
| Octadecanamide                 | 284.295 | 8.55 | 0.77 | Yes | No  | No  | -                                        | Metabolite derived from stearic acid, found in plant and animal fats | Yes | Found in environmental and plant samples                                                          |
| Xanthosine                     | 285.083 | 0.40 | 0.9  | Yes | Yes | No  | -                                        | Purine nucleoside                                                    | Yes | Found in built environment, animal, and bacterial culture samples.                                |
| Arg-Ile<br>(Arginylisoleucine) | 288.203 | 0.36 | 0.96 | Yes | Yes | No  | -                                        | Arginine and isoleucine dipeptide                                    | Yes | Found in food and animal samples. Also found in human stomach, saliva, spleen, and fecal samples. |
| cis-11,14-Eicosadienoic acid   | 291.268 | 5.54 | 0.79 | Yes | No  | No  | Prenol lipids (5.36%)                    | Omega-6 fatty acid found in human milk                               | Yes | Found in bacterial culture ( <i>Propionibacterium acnes</i> ) and plant samples                   |
| N-Acetylmuramic Acid           | 294.119 | 0.38 | 0.84 | Yes | Yes | Yes | Carboxylic acids and derivatives (4.08%) | Component of bacterial cell walls                                    | Yes | Found in animal samples. In humans, found in caecum and fecal samples.                            |

|                                         |         |      |      |     |     |     |                                           |                                                |     |                                                                                                                                                                                                                                                                                        |
|-----------------------------------------|---------|------|------|-----|-----|-----|-------------------------------------------|------------------------------------------------|-----|----------------------------------------------------------------------------------------------------------------------------------------------------------------------------------------------------------------------------------------------------------------------------------------|
| Tyr-Leu (Tyrosylleucine)                | 295.165 | 2.71 | 0.97 | Yes | Yes | Yes | Carboxylic acids and derivatives (31.25%) | Tyrosyl and leucine dipeptide                  | Yes | Found in fungal and bacterial cultures ( <i>Prevotella nigrescens</i> CC14M). Also found in human feces                                                                                                                                                                                |
| Phe-Met (Phenylalanylmethionine)        | 297.126 | 2.18 | 0.93 | Yes | Yes | No  | -                                         | Phenylalanine and methionine dipeptide         | Yes | Found in bacterial cultures ( <i>Bacteroides stercoris</i> CC31F, <i>Prevotella bivia</i> , etc.).                                                                                                                                                                                     |
| Ile-Gly-Ile (Isoleucylglycylisoleucine) | 302.205 | 3.04 | 0.94 | Yes | Yes | No  | -                                         | Isoleucine, glycine, and isoleucine tripeptide | No  | Found in animal and bacterial culture samples ( <i>Staphylococcus aureus</i> , <i>Bacteroides dorei</i> , <i>Bacteroides stercoris</i> , etc.). Also found in human samples collected from different body parts (duodenum, jejunum, urine, ileum, colon, saliva, stomach, fecal, etc.) |

|                               |         |      |      |     |     |     |                                          |                                                |                     |                                                                                                                                                                                                 |
|-------------------------------|---------|------|------|-----|-----|-----|------------------------------------------|------------------------------------------------|---------------------|-------------------------------------------------------------------------------------------------------------------------------------------------------------------------------------------------|
| Val-Trp (Valyltryptophan)     | 304.167 | 3.02 | 0.97 | Yes | Yes | No  | -                                        | Valine and tryptophan dipeptide                | Yes                 | Found in fungal culture, food, and animal samples. Also found in human jejunum, stomach, duodenum, vagina, spleen, ileum, and fecal samples                                                     |
| Fructoselysine                | 309.164 | 0.31 | 0.85 | Yes | No  | No  | Carboxylic acids and derivatives (4.08%) | Potential biomarker for milk and milk products | No (found in blood) | Found in animal samples. Small percentage also found in food samples. Found in human jejunum, kidney, ileum, fecal, and blood samples                                                           |
| N-Palmitoylglycine            | 314.27  | 7.34 | 0.86 | Yes | No  | No  | -                                        | Human metabolite with fatty acid group         | No                  | Found in environmental and animal samples.                                                                                                                                                      |
| Ile-Trp (Isoleucyltryptophan) | 318.167 | 2.27 | 0.97 | Yes | Yes | Yes | -                                        | Isoleucine and tryptophan dipeptide            | Yes                 | Found in bacterial cultures ( <i>Bacteroides stercoris</i> CC31F, <i>Selenomonas noxia</i> , etc.). Small percentage also in animal and fungal cultures. Also found in human intestinal samples |

|                                       |                |             |             |            |            |            |                                   |                                                    |                        |                                                                                                                                                                                                                                                 |
|---------------------------------------|----------------|-------------|-------------|------------|------------|------------|-----------------------------------|----------------------------------------------------|------------------------|-------------------------------------------------------------------------------------------------------------------------------------------------------------------------------------------------------------------------------------------------|
| <b>Lithocholic acid</b>               | <b>323.273</b> | <b>6.84</b> | <b>0.97</b> | <b>Yes</b> | <b>Yes</b> | <b>Yes</b> | <b>Prenol lipids<br/>(11.11%)</b> | <b>Secondary<br/>bile acid</b>                     | <b>Yes</b>             | <b>Found in human feces.</b>                                                                                                                                                                                                                    |
| Leucine enkephalin                    | 336.192        | 3.22        | 0.77        | Yes        | Yes        | Yes        | -                                 | Enkephalin<br>peptide;<br>Produced in<br>brain     | No (found in<br>blood) | Found in bacterial cultures<br>( <i>Parabacteroides<br/>goldsteinii</i> CC87F,<br><i>Parabacteroides merdae</i> ,<br>etc.)                                                                                                                      |
| 13-Docosenamide, (Z)-<br>(Erucamide)  | 338.342        | 9.19        | 0.83        | Yes        | Yes        | Yes        | -                                 | Fatty amide                                        | No                     | Found in human colon,<br>upper digestive tract, liver,<br>and fecal samples. Also<br>found in bacterial cultures<br>( <i>Peptostreptococcus sp.</i><br>CC14N, <i>Bifidobacterium<br/>longum subsp. longum</i> 44B,<br>etc.) and fungal cultures |
| Phe-Trp<br>(Phenylalanyltryptophan)   | 352.166        | 3.28        | 0.96        | Yes        | Yes        | No         | -                                 | Phenylalanine<br>and tryptophan<br>dipeptide       | Yes                    | Found in fungal cultures<br>(species not specified)                                                                                                                                                                                             |
| Ile-Val-Lys<br>(Isoleucylvalyllysine) | 359.266        | 0.60        | 0.91        | Yes        | Yes        | Yes        | -                                 | Isoleucine,<br>valine, and<br>lysine<br>tripeptide | No                     | Found in animal and<br>bacterial culture samples.<br>Also found in human<br>jejunum, duodenum, ileum,<br>caecum, colon, vaginal, and<br>fecal samples                                                                                           |

|                                                                                                                                            |         |       |      |     |     |     |                                           |                                            |     |                                                                                                                                                                                                               |
|--------------------------------------------------------------------------------------------------------------------------------------------|---------|-------|------|-----|-----|-----|-------------------------------------------|--------------------------------------------|-----|---------------------------------------------------------------------------------------------------------------------------------------------------------------------------------------------------------------|
| Cholesterol                                                                                                                                | 369.352 | 10.50 | 0.97 | Yes | Yes | Yes | -                                         | Animal sterol from body tissues and plasma | Yes | Found in plant and environmental samples.                                                                                                                                                                     |
| (R)-4-<br>((3R,5S,8R,9S,10S,13R,14S,17R)-3-hydroxy-10,13-dimethyl-7,12-dioxohexadecahydro-1H-cyclopenta[a]phenanthren-17-yl)pentanoic acid | 405.264 | 4.81  | 0.92 | Yes | Yes | No  | Steroids and steroid derivatives (46.15%) | NA                                         | No  | Predominantly found in bacterial cultures ( <i>Bacteroides caccae</i> , <i>Bacteroides ovatus</i> , <i>Clostridium orbiscindens</i> , etc.). Also found in mouse and human digestive tract and fecal samples. |
| Glycoursodeoxycholic acid                                                                                                                  | 414.301 | 5.01  | 0.9  | Yes | Yes | No  | Steroids and steroid derivatives (36.71%) | Secondary bile acid                        | Yes | Found in animal samples (rats and humans). Also found in human blood plasma, blood serum, urine, skin, and fecal samples.                                                                                     |
| Cholic acid                                                                                                                                | 426.318 | 5.19  | 0.98 | Yes | Yes | Yes | Steroids and steroid derivatives (8%)     | Bile acid produced in liver                | Yes | Found in human GI tract and feces. Associated with urban samples. Also found in bacterial cultures                                                                                                            |

|                                                                                                                                                                                          |         |      |      |     |     |    |                                                    |                        |     |                                                                                                                                                                                                                         |
|------------------------------------------------------------------------------------------------------------------------------------------------------------------------------------------|---------|------|------|-----|-----|----|----------------------------------------------------|------------------------|-----|-------------------------------------------------------------------------------------------------------------------------------------------------------------------------------------------------------------------------|
| 6R)-2-(hydroxymethyl)-6-<br>((3R,5R,7R,8R,9S,10S,12<br>S,13R,14S,17R)-3,7,12-<br>trihydroxy-10,13-<br>dimethylhexadecahydro-<br>1H-<br>cyclopenta[a]phenanthren-<br>17-yl)heptanoic acid | 431.318 | 5.25 | 0.86 | Yes | Yes | No | Steroids and<br>steroid<br>derivatives<br>(6.12%)  | NA                     | No  | Found in human feces (<18<br>years old)                                                                                                                                                                                 |
| Oleanolic acid                                                                                                                                                                           | 439.359 | 7.62 | 0.92 | Yes | No  | No | -                                                  | Plant<br>metabolite    | Yes | Found in fungal culture,<br>food, plant, environment,<br>and beverage samples. In<br>humans, found in caecum<br>and fecal samples.                                                                                      |
| Glycocholic acid                                                                                                                                                                         | 466.32  | 4.69 | 0.96 | Yes | Yes | No | Steroids and<br>steroid<br>derivatives<br>(13.04%) | Secondary<br>bile acid | Yes | <b>Found in bacterial culture<br/>(e.g., <i>Enterococcus<br/>faecium</i>, <i>Prevotella oralis</i>,<br/>etc.) and food samples. In<br/>humans, found in urine,<br/>jejunum, digestive tract,<br/>and fecal samples.</b> |



|                    |                |             |             |            |            |            |                                               |                                                                             |                            |                                                                                    |
|--------------------|----------------|-------------|-------------|------------|------------|------------|-----------------------------------------------|-----------------------------------------------------------------------------|----------------------------|------------------------------------------------------------------------------------|
| <b>Enoxolone</b>   | <b>471.347</b> | <b>6.92</b> | <b>0.86</b> | <b>Yes</b> | <b>No</b>  | <b>No</b>  | <b>-</b>                                      | <b>Derived from plant metabolite; Commonly used as artificial sweetener</b> | <b>No (found in blood)</b> | <b>Found in human feces (largely individuals &lt;18 years) and fungal cultures</b> |
| <b>Bilirubin</b>   | <b>585.272</b> | <b>8.90</b> | <b>0.95</b> | <b>Yes</b> | <b>Yes</b> | <b>No</b>  | <b>-</b>                                      | <b>Bile pigment produced during heme breakdown</b>                          | <b>Yes</b>                 | <b>Found in upper digestive tract and feces of humans.</b>                         |
| <b>Urobilin</b>    | <b>591.318</b> | <b>4.07</b> | <b>0.96</b> | <b>Yes</b> | <b>Yes</b> | <b>Yes</b> | <b>-</b>                                      | <b>Responsible for yellow coloring of urine</b>                             | <b>Yes</b>                 | <b>Found in urban human colon and fecal samples.</b>                               |
| <b>Stercobilin</b> | <b>595.349</b> | <b>4.05</b> | <b>0.94</b> | <b>Yes</b> | <b>Yes</b> | <b>No</b>  | <b>Tetrapyrroles and derivatives (53.85%)</b> | <b>Responsible for brown coloring of feces</b>                              | <b>Not available</b>       | <b>Found in human fecal samples.</b>                                               |
