# Supplementary material for: Untargeted Fecal Metabolomic Analyses across an Industrialization Gradient Reveal Shared Metabolites and Impact of Industrialization on Fecal Microbiome-Metabolome Interactions
Source: PubMed Central journal article supplement (PMC9765122; doi:10.1128/msystems.00710-22), 2022-11-23
Supplement: msystems.00710-22-s0007.pdf [file msystems.00710-22-s0007.pdf]

| Compound Name                          | <i>m/z</i> | RT (min) | MASST Results                                                        | Common MASST Bacterial matches                                                                            | Common MASST dataset matches         | MASST Link                                                                                                                                                                        | Present in ReDU All Human Fecal Sample Search |
|----------------------------------------|------------|----------|----------------------------------------------------------------------|-----------------------------------------------------------------------------------------------------------|--------------------------------------|-----------------------------------------------------------------------------------------------------------------------------------------------------------------------------------|-----------------------------------------------|
| Hypoxanthine                           | 137.046    | 0.39     | <b>5 dataset matches;</b> 1 human, 4 mouse                           | NA                                                                                                        | NA                                   | <a href="https://gnps.ucsd.edu/Proteomics/status.jsp?task=4a2ea5870d2e4622a5b90e4edfca3f17">https://gnps.ucsd.edu/Proteomics/status.jsp?task=4a2ea5870d2e4622a5b90e4edfca3f17</a> | Present                                       |
| Nicotinamide N-oxide                   | 139.05     | 0.31     | <b>5 dataset matches;</b> 1 human, 4 mouse                           | NA                                                                                                        | NA                                   | <a href="https://gnps.ucsd.edu/Proteomics/status.jsp?task=6cd1ad150059472e84f3f95842588083">https://gnps.ucsd.edu/Proteomics/status.jsp?task=6cd1ad150059472e84f3f95842588083</a> | Absent                                        |
| 3-methyl-2-oxindole (3-Methyloxindole) | 148.076    | 3.22     | No results                                                           | NA                                                                                                        | NA                                   | <a href="https://gnps.ucsd.edu/Proteomics/status.jsp?task=18ca57b672484cb2b4d89b5235afc96d">https://gnps.ucsd.edu/Proteomics/status.jsp?task=18ca57b672484cb2b4d89b5235afc96d</a> | Present                                       |
| Hyocholic acid                         | 158.154    | 4.78     | <b>12 dataset matches;</b> 1 human, 1 mouse, 3 environmental samples | <i>Pseudomonas, Streptomyces albus, Bacillus subtilis, E. coli, Bacteroides, Eubacterium, Akkermansia</i> | Human Gut Bacteria Biotransformation | <a href="https://gnps.ucsd.edu/Proteomics/status.jsp?task=b93deedfe65c46de8b656c93f0e7f50d">https://gnps.ucsd.edu/Proteomics/status.jsp?task=b93deedfe65c46de8b656c93f0e7f50d</a> | Absent                                        |

|                                                    |         |      |                                                                                                                                              |                                                         |                                                                                                                                                                |                                                                                                                                                                                   |         |
|----------------------------------------------------|---------|------|----------------------------------------------------------------------------------------------------------------------------------------------|---------------------------------------------------------|----------------------------------------------------------------------------------------------------------------------------------------------------------------|-----------------------------------------------------------------------------------------------------------------------------------------------------------------------------------|---------|
| Gly-Val<br>(Glycylvaline)                          | 175.107 | 0.36 | <b>7 dataset matches;</b> 1 human, 1 environmental sample                                                                                    | <i>Pseudomonas, Streptomyces, Staphylococcus aureus</i> | Zoo mammal fecal metabolomes                                                                                                                                   | <a href="https://gnps.ucsd.edu/Proteomics/status.jsp?task=1ce565d3cbe842b1a3f3b82de47606a7">https://gnps.ucsd.edu/Proteomics/status.jsp?task=1ce565d3cbe842b1a3f3b82de47606a7</a> | Present |
| 3-Hydroxy-4-methoxycinnamic acid (Isoferulic acid) | 177.055 | 4.13 | <b>18 dataset matches;</b> 1 human, 5 mouse, 1 environmental sample, 4 plant (sweet orange, tomato), 1 mushroom dataset                      | "Bacteria"                                              | Human-associated bacteria cultured with bile acids, Nobel twin study                                                                                           | <a href="https://gnps.ucsd.edu/Proteomics/status.jsp?task=10153589289f45448d9db441d300369a">https://gnps.ucsd.edu/Proteomics/status.jsp?task=10153589289f45448d9db441d300369a</a> | Absent  |
| 2-Butanone, 4-(2,6,6-trimethyl-2-cyclohexen-1-yl)  | 177.164 | 3.15 | <b>39 dataset matches;</b> 6 human, 4 mouse, 5 rat, 4 environmental samples, 6 plant (rosemary, <i>Eudicotyledons</i> , thale cress, tomato) | <i>Marinobacter, Amycolatopsis, Streptomyces</i>        | Burger ingredients common human diet, Amerindians urbanization gradient, zoo mammal fecal metabolomes, anti-inflammatory diet in rheumatoid arthritis patients | <a href="https://gnps.ucsd.edu/Proteomics/status.jsp?task=d762844f0b444356a4958da4c610765f">https://gnps.ucsd.edu/Proteomics/status.jsp?task=d762844f0b444356a4958da4c610765f</a> | Present |

|                    |         |      |                                                                                                                                                            |                                                                                  |                                                                                                                                                    |                                                                                                                                                                                   |         |
|--------------------|---------|------|------------------------------------------------------------------------------------------------------------------------------------------------------------|----------------------------------------------------------------------------------|----------------------------------------------------------------------------------------------------------------------------------------------------|-----------------------------------------------------------------------------------------------------------------------------------------------------------------------------------|---------|
| Paraxanthine       | 181.072 | 0.81 | <b>14 dataset matches;</b> 11 human, 1 mouse, 1 environmental samples                                                                                      | NA                                                                               | Anti-inflammatory diet in rheumatoid arthritis patients, Nobel twin study, Human rheumatoid arthritis, Metabolomic analysis of Alzheimer's disease | <a href="https://gnps.ucsd.edu/Proteomics/status.jsp?task=fc336a940189429f85395db848e77d57">https://gnps.ucsd.edu/Proteomics/status.jsp?task=fc336a940189429f85395db848e77d57</a> | Present |
| trans-Ferulic acid | 195.065 | 3.01 | <b>52 dataset matches;</b> 11 human, 20 mouse, 1 rat, 1 environmental sample, plants (melon, corn, tomato, oranges), chemical standards with human samples | <i>Bacillus subtilis, Pseudomonas, Bacteroides, Bifidobacterium, Akkermansia</i> | Human Gut Bacteria Biotransformation                                                                                                               | <a href="https://gnps.ucsd.edu/Proteomics/status.jsp?task=bf38c3b5b06c440ba397bbc10cf73601">https://gnps.ucsd.edu/Proteomics/status.jsp?task=bf38c3b5b06c440ba397bbc10cf73601</a> | Present |
| Loliolide          | 197.117 | 3.11 | <b>95 dataset matches;</b> 10 human, 4 mouse, 2 rat, 28 environmental samples, ~10 plants (thale cress, tomato, thapsia, melon, corn)                      | <i>Pseudomonas, Bacillus, Cyanobacteria, Streptomyces</i>                        | Zoo mammal fecal metabolomes, Amerindians urbanization gradient, ONR Human Wright Study, Analysis of Alzheimer's                                   | <a href="https://gnps.ucsd.edu/Proteomics/status.jsp?task=be50e86038794e1b9e0225109de958fa">https://gnps.ucsd.edu/Proteomics/status.jsp?task=be50e86038794e1b9e0225109de958fa</a> | Present |

|                          |         |      |                                                                                                                       |                                                                                                                                                                                                                                         |                                                                                                                                                                  |                                                                                                                                                                                   |         |
|--------------------------|---------|------|-----------------------------------------------------------------------------------------------------------------------|-----------------------------------------------------------------------------------------------------------------------------------------------------------------------------------------------------------------------------------------|------------------------------------------------------------------------------------------------------------------------------------------------------------------|-----------------------------------------------------------------------------------------------------------------------------------------------------------------------------------|---------|
| 3-Hydroxydodecanoic acid | 199.169 | 5.35 | <b>21 dataset matches;</b> 13 human, 3 mouse, 1 environmental samples, 1 plant (corn), 1 food fermentation metagenome | <i>Bacillus subtilis</i> ,<br><i>Burkholderia</i>                                                                                                                                                                                       | American Gut (with comparison for high and low plant consumption), Nobel twin study, Human fecal material standards, Human rheumatoid arthritis                  | <a href="https://gnps.ucsd.edu/Proteomics/status.jsp?task=fb1b298fcd564e1594389d0207087f21">https://gnps.ucsd.edu/Proteomics/status.jsp?task=fb1b298fcd564e1594389d0207087f21</a> | Present |
| N-Acetyl-D-mannosamine   | 204.087 | 3.27 | <b>83 dataset matches;</b> 20 human, 11 mouse, 2 rat, 20 environmental samples, ~4 plant (tomato, cotton)             | <i>Streptomyces albus</i> ,<br><i>Pseudomonas</i> , <i>E. coli</i> , <i>C. difficile</i> , <i>Burkholderia</i> ,<br><i>Actinomycete</i>                                                                                                 | American Gut, Amerindians Urbanization Gradient, Human fecal characterization test, Human rheumatoid arthritis                                                   | <a href="https://gnps.ucsd.edu/Proteomics/status.jsp?task=fc40869d5519485a808dc7caf0a2b8ae">https://gnps.ucsd.edu/Proteomics/status.jsp?task=fc40869d5519485a808dc7caf0a2b8ae</a> | Present |
| N-acetyl-L-Phenylalanine | 208.097 | 2.84 | <b>76 dataset matches;</b> 17 human, 15 mouse, 7 environmental samples, 8 food metagenome, 1 plant (tomato)           | <i>Actinobacteria</i> ,<br><i>Streptomyces</i> , <i>Rothia isolates</i> , <i>Bacillus</i> ,<br><i>Akkermansia</i> ,<br><i>Bifidobacterium</i> ,<br><i>Pseudomonas</i> ,<br><i>Cutibacterium acnes</i> ,<br><i>Staphylococcus aureus</i> | American Gut (also with high and low plant consumption comparison), Amazon urbanization housing analysis, Nobel twin study, Human Gut Bacteria Biotransformation | <a href="https://gnps.ucsd.edu/Proteomics/status.jsp?task=7279069e65014373ad790ecb80156672">https://gnps.ucsd.edu/Proteomics/status.jsp?task=7279069e65014373ad790ecb80156672</a> | Present |

|                              |         |      |                                                                                                                                          |                                                                                                       |                                                                                                                                                                                                       |                                                                                                                                                                                   |         |
|------------------------------|---------|------|------------------------------------------------------------------------------------------------------------------------------------------|-------------------------------------------------------------------------------------------------------|-------------------------------------------------------------------------------------------------------------------------------------------------------------------------------------------------------|-----------------------------------------------------------------------------------------------------------------------------------------------------------------------------------|---------|
| Thr-Pro<br>(Threonylproline) | 217.122 | 0.46 | <b>15 dataset matches;</b> 5 human, 5 mouse, 1 rat, 1 environmental samples, 2 plants (tomato)                                           | "Bacteria"                                                                                            | NA                                                                                                                                                                                                    | <a href="https://gnps.ucsd.edu/Proteomics/status.jsp?task=607f9ac84efe43a9a26a642389869975">https://gnps.ucsd.edu/Proteomics/status.jsp?task=607f9ac84efe43a9a26a642389869975</a> | Present |
| Val-Val<br>(Valylvaline)     | 217.155 | 0.45 | <b>35 dataset matches;</b> 6 human, 7 mouse, 4 rat, 2 environmental samples, 2 food metagenome, ~3 plant (thale cress, potato, wild oat) | <i>Staphylococcus aureus</i> ,<br><i>Bacteroides</i> , <i>Akkermansia</i> ,<br><i>Bifidobacterium</i> | Human gut bacteria biotransformation, Zoo mammal fecal metabolomes, Anti-inflammatory diet in rheumatoid arthritis patients, Human fecal material standards, Burger ingredients, ONR feces and plasma | <a href="https://gnps.ucsd.edu/Proteomics/status.jsp?task=a0be1a5518ef4594bd188eed2bd4e6d2">https://gnps.ucsd.edu/Proteomics/status.jsp?task=a0be1a5518ef4594bd188eed2bd4e6d2</a> | Present |

|                  |         |      |                                                                                                                                                                                                  |                                                                            |                                                                                                                                               |                                                                                                                                                                             |         |
|------------------|---------|------|--------------------------------------------------------------------------------------------------------------------------------------------------------------------------------------------------|----------------------------------------------------------------------------|-----------------------------------------------------------------------------------------------------------------------------------------------|-----------------------------------------------------------------------------------------------------------------------------------------------------------------------------|---------|
| Abrine           | 219.113 | 0.61 | <b>3 dataset matches;</b> 3 human                                                                                                                                                                | NA                                                                         | American Gut (also UK), Malawi legume study                                                                                                   | <a href="https://gnps.ucsd.edu/ProteomeStatus.jsp?task=7a23704e8e7c40a7a18692083e5b00c2">https://gnps.ucsd.edu/ProteomeStatus.jsp?task=7a23704e8e7c40a7a18692083e5b00c2</a> | Present |
| Pantothenic acid | 220.118 | 0.56 | <b>142 dataset matches;</b> 33 human, 33 mouse, 4 rat, 5 environmental samples, ~11 plant (potato, peppers, melon, corn, sugarcane, tomato, thale cress, thapsia, <i>Nicotiana benthamiana</i> ) | <i>Pseudomonas, E. coli, Streptomyces, Bacillus, Staphylococcus aureus</i> | American gut (also UK; also high vs low plant consumption comparison), Nobel twin study, Zoo mammal fecal samples, Human rheumatoid arthritis | <a href="https://gnps.ucsd.edu/ProteomeStatus.jsp?task=bce374bc20ef4f69ae9348a776d48e8f">https://gnps.ucsd.edu/ProteomeStatus.jsp?task=bce374bc20ef4f69ae9348a776d48e8f</a> | Present |

|                                      |         |      |                                                                                                                                                  |                                                                                                  |                                                                                                                                                                                               |                                                                                                                                                                                   |         |
|--------------------------------------|---------|------|--------------------------------------------------------------------------------------------------------------------------------------------------|--------------------------------------------------------------------------------------------------|-----------------------------------------------------------------------------------------------------------------------------------------------------------------------------------------------|-----------------------------------------------------------------------------------------------------------------------------------------------------------------------------------|---------|
| PyroGlu-Pro<br>(Pyroglutamylproline) | 227.103 | 0.44 | <b>44 dataset matches;</b> 20 human, 5 mouse, 7 food metagenome, 2 environmental samples, ~3 plant (cotton, <i>Nicotiana benthamiana</i> , corn) | <i>Amycolatopsis</i> , <i>Bacillus subtilis</i> , <i>Pseudomonas</i> , <i>Streptomyces albus</i> | American Gut, ONR human diet, Human-associated bacteria cultured with bile acids                                                                                                              | <a href="https://gnps.ucsd.edu/Proteomics/status.jsp?task=893f768b31de46f5903ad003dfdb2152">https://gnps.ucsd.edu/Proteomics/status.jsp?task=893f768b31de46f5903ad003dfdb2152</a> | Present |
| Myristoleic acid                     | 227.201 | 5.94 | <b>35 dataset matches;</b> 17 human, 6 mouse, 1 rat, 3 environmental samples, ~2 plant (cotton, tomato)                                          | <i>Streptomyces chartreusis</i>                                                                  | Burger ingredients, American gut (with high vs low plant consumption comparison), Amerindians urbanization gradient, ONR Primary Wright, Human fecal material standards, Alzheimer's analysis | <a href="https://gnps.ucsd.edu/Proteomics/status.jsp?task=09d5bd98a46145e982b986a34e4591ef">https://gnps.ucsd.edu/Proteomics/status.jsp?task=09d5bd98a46145e982b986a34e4591ef</a> | Present |

|                               |         |      |                                                                                                                                                                               |                                                                                                                                                                                                                   |                                                                                                                                                                                                                                                                                               |                                                                                                                                                                                          |         |
|-------------------------------|---------|------|-------------------------------------------------------------------------------------------------------------------------------------------------------------------------------|-------------------------------------------------------------------------------------------------------------------------------------------------------------------------------------------------------------------|-----------------------------------------------------------------------------------------------------------------------------------------------------------------------------------------------------------------------------------------------------------------------------------------------|------------------------------------------------------------------------------------------------------------------------------------------------------------------------------------------|---------|
| Ile-Pro<br>(Isoleucylproline) | 229.155 | 0.76 | <p><b>168 dataset matches;</b> 44 human, 32 mouse, 5 rat, 12 environmental samples, 7 food metagenome, ~9 plant (tomato, corn, cotton, potato)</p>                            | <p><i>Pseudomonas, Streptomyces, Bacillus, Bacteroides, Akkermansia, Bifidobacterium, Staphylococcus aureus, Lactobacillus, Amycolatopsis, Paenibacillus, E. coli, Eggerthella lenta, Serratia plymuthica</i></p> | <p>American Gut (also UK and with plant consumption comparison), Human gut bacteria biotransformation, Human-associated bacteria cultured with bile acids, Zoo mammal fecal samples, Nobel twin study, Burger ingredients, Amerindians urbanization gradient, Human skin microbe isolates</p> | <p><a href="https://gnps.ucsd.edu/Proteomics/status.jsp?task=63a8a19454df4473b3bcbab0a4023ce9">https://gnps.ucsd.edu/Proteomics/status.jsp?task=63a8a19454df4473b3bcbab0a4023ce9</a></p> | Present |
| Val-Ile<br>(Valylisoleucine)  | 231.171 | 2.82 | <p><b>80 dataset matches;</b> 18 human, 11 mouse, 4 rat, 3 environmental samples, 6 food metagenome, ~6 plant (thale cress, <i>Nicotiana benthamiana</i>, tomato, cotton)</p> | <p><i>Staphylococcus, Bacteroides, Akkermansia, Bifidobacterium, Pseudomonas, Actinomycete, Streptomyces, Alteromonas</i></p>                                                                                     | <p>Human gut bacteria biotransformation, American gut (also UK), ONR Primary Wright, Burger ingredients, Human fecal material standards</p>                                                                                                                                                   | <p><a href="https://gnps.ucsd.edu/Proteomics/status.jsp?task=c96f435a91334e1fb38bcd1d0c111a11">https://gnps.ucsd.edu/Proteomics/status.jsp?task=c96f435a91334e1fb38bcd1d0c111a11</a></p> | Present |



|                                            |         |      |                                                                                                                                            |                                                                                                                                                                                                                                       |                                                                                                                                                                                           |                                                                                                                                                                                       |         |
|--------------------------------------------|---------|------|--------------------------------------------------------------------------------------------------------------------------------------------|---------------------------------------------------------------------------------------------------------------------------------------------------------------------------------------------------------------------------------------|-------------------------------------------------------------------------------------------------------------------------------------------------------------------------------------------|---------------------------------------------------------------------------------------------------------------------------------------------------------------------------------------|---------|
| cis-9-Hexadecenoic acid (Palmitoleic acid) | 237.221 | 6.49 | <b>73 dataset matches;</b> 33 human, 14 mouse, 4 rat, 5 environmental samples (also built environment), ~6 plant (tomato, corn, sugarcane) | <i>Bacillus subtilis</i> ,<br><i>Bacteroides</i> ,<br><i>Bifidobacterium</i> ,<br><i>Akkermansia</i> , <i>Lactobacillus</i> ,<br><i>Cyanobacteria</i> ,<br><i>Marinobacter</i> ,<br><i>Prochlorococcus marinus</i> ,<br><i>Rothia</i> | Human gut bacteria biotransformation, American Gut (subset for plant consumption comparison), ONR primary Wright, burger ingredients, Amerindians urbanization gradient, Nobel twin study | <a href="https://gnps.ucsd.edu/ProteomeSAFe/status.jsp?task=d3eed7e162f24c3ab3b2c1c3e2e98785">https://gnps.ucsd.edu/ProteomeSAFe/status.jsp?task=d3eed7e162f24c3ab3b2c1c3e2e98785</a> | Present |
| Gly-Tyr (Glycyltyrosine)                   | 239.102 | 0.44 | <b>34 dataset matches;</b> 13 human, 10 mouse, 1 rat, 3 environmental samples, ~2 plant (tomato, potato)                                   | <i>Staphylococcus aureus</i> ,<br><i>Bacteroides</i> , <i>Akkermansia</i> ,<br><i>Bifidobacterium</i>                                                                                                                                 | Human gut bacteria biotransformation, Human-associated bacteria cultured with bile acids, anti-inflammatory diet in rheumatoid arthritis patients                                         | <a href="https://gnps.ucsd.edu/ProteomeSAFe/status.jsp?task=ecd1a94b14a4822a4466ca3c86b4bab">https://gnps.ucsd.edu/ProteomeSAFe/status.jsp?task=ecd1a94b14a4822a4466ca3c86b4bab</a>   | Present |

|                            |         |      |                                                                                                                                                                                                                    |                                                                                                                                                                                                                                                                                                                                                                                                                |                                                                                                                                                                                                                                                                                                                                               |                                                                                                                                                                                   |         |
|----------------------------|---------|------|--------------------------------------------------------------------------------------------------------------------------------------------------------------------------------------------------------------------|----------------------------------------------------------------------------------------------------------------------------------------------------------------------------------------------------------------------------------------------------------------------------------------------------------------------------------------------------------------------------------------------------------------|-----------------------------------------------------------------------------------------------------------------------------------------------------------------------------------------------------------------------------------------------------------------------------------------------------------------------------------------------|-----------------------------------------------------------------------------------------------------------------------------------------------------------------------------------|---------|
| Biotin                     | 245.098 | 2.39 | No results                                                                                                                                                                                                         | NA                                                                                                                                                                                                                                                                                                                                                                                                             | NA                                                                                                                                                                                                                                                                                                                                            | <a href="https://gnps.ucsd.edu/Proteomics/status.jsp?task=7e05ee9c085e492a871eb3bea1d24f50">https://gnps.ucsd.edu/Proteomics/status.jsp?task=7e05ee9c085e492a871eb3bea1d24f50</a> | Present |
| Leu-Leu<br>(Leucylleucine) | 245.186 | 2.40 | <b>190 dataset matches;</b> 60 human, 30 mouse, 5 rat, 16 environment (also built environment), 13 food metagenome, ~14 plant (tomato, potato, melon, corn, malus, cotton, <i>Nicotiana benthamiana</i> , oranges) | <i>E. coli</i> , <i>Staphylococcus aureus</i> , <i>Pseudomonas</i> , <i>Streptomyces</i> , <i>Nocardia</i> , <i>Bacillus</i> , <i>Burkholderia</i> , <i>Eggerthella lenta</i> , <i>Bacteroides</i> , <i>Akkermansia</i> , <i>Bifidobacterium</i> , <i>Lactobacillus</i> , <i>Roseburia</i> , <i>Paenibacillus</i> , <i>Alteromonas</i> , <i>Amycolaptosis</i> , <i>Xanthomonas citri</i> , <i>Actinomycete</i> | American gut (with plant consumption comparison), Human gut bacteria biotransformation, Burger ingredients, Human-associated bacteria cultured with bile acids, ONR human diet, ONR primary wright, Human skin microbiome isolates, Amazon urbanization housing analysis, Zoo mammal fecal samples, Ancient DNA teeth, Anti-inflammatory diet | <a href="https://gnps.ucsd.edu/Proteomics/status.jsp?task=5362cc2f00994eeba80d4bc3db7954e0">https://gnps.ucsd.edu/Proteomics/status.jsp?task=5362cc2f00994eeba80d4bc3db7954e0</a> | Present |

|                           |         |      |                                                                                                  |                                                                                                 |                                                                                                                                                             |                                                                                                                                                                                   |         |
|---------------------------|---------|------|--------------------------------------------------------------------------------------------------|-------------------------------------------------------------------------------------------------|-------------------------------------------------------------------------------------------------------------------------------------------------------------|-----------------------------------------------------------------------------------------------------------------------------------------------------------------------------------|---------|
|                           |         |      |                                                                                                  |                                                                                                 | of rheumatoid arthritis patients, Amazon skin and environmental samples                                                                                     |                                                                                                                                                                                   |         |
| Lenticin                  | 247.145 | 1.22 | <b>42 dataset matches;</b> 35 human, 3 environmental samples, 1 plant (tomato)                   | NA                                                                                              | ONR Human study, Human rheumatoid arthritis, American gut (also UK), Zoo mammal fecal samples, Nobel twin study                                             | <a href="https://gnps.ucsd.edu/Proteomics/status.jsp?task=da61e8f7b5e744ac99a829e23a067c71">https://gnps.ucsd.edu/Proteomics/status.jsp?task=da61e8f7b5e744ac99a829e23a067c71</a> | Present |
| Val-Met (Valylmethionine) | 249.126 | 0.56 | <b>27 dataset matches;</b> 4 human, 6 mouse, 5 rat, 3 food metagenome, ~2 plant (potato, tomato) | <i>Staphylococcus aureus</i> , <i>Bacteroides</i> , <i>Akkermansia</i> , <i>Bifidobacterium</i> | Human gut bacteria biotransformation, Burger ingredients, ONR human diet, Zoo mammal fecal samples, Anti-inflammatory diet in rheumatoid arthritis patients | <a href="https://gnps.ucsd.edu/Proteomics/status.jsp?task=3772722082864e3db8ffa8be8d87607c">https://gnps.ucsd.edu/Proteomics/status.jsp?task=3772722082864e3db8ffa8be8d87607c</a> | Present |

|                                  |         |      |                                                                                                                                     |                                                                                                                                                                                                  |                                                                                                                                                        |                                                                                                                                                                                   |         |
|----------------------------------|---------|------|-------------------------------------------------------------------------------------------------------------------------------------|--------------------------------------------------------------------------------------------------------------------------------------------------------------------------------------------------|--------------------------------------------------------------------------------------------------------------------------------------------------------|-----------------------------------------------------------------------------------------------------------------------------------------------------------------------------------|---------|
| Ser-Phe<br>(Serylphenylalanine)  | 253.118 | 0.79 | <b>64 dataset matches;</b> 18 human, 13 mouse, 2 rat, 9 environmental samples, ~6 plant (cotton, thale cress, potato, corn, tomato) | <i>Pseudomonas, Streptomyces, E. coli, Amycolaptosis, Bacillus</i>                                                                                                                               | Human gut bacteria biotransformation, American gut (with plant consumption comparison), Zoo mammal fecal samples, Burger ingredients, Nobel twin study | <a href="https://gnps.ucsd.edu/Proteomics/status.jsp?task=4cd767ae2c9d4f2a815c2120511c9112">https://gnps.ucsd.edu/Proteomics/status.jsp?task=4cd767ae2c9d4f2a815c2120511c9112</a> | Present |
| Palmitelaidic acid               | 255.232 | 5.96 | <b>31 dataset matches;</b> 12 human, 9 mouse, 1 rat, 3 environment (also built environment), ~1 plant (corn)                        | <i>Bacillus subtilis</i>                                                                                                                                                                         | Amerindians urbanization gradient                                                                                                                      | <a href="https://gnps.ucsd.edu/Proteomics/status.jsp?task=8dbc4bee89914f249f91ab103ac05d26">https://gnps.ucsd.edu/Proteomics/status.jsp?task=8dbc4bee89914f249f91ab103ac05d26</a> | Present |
| L-Saccharopine                   | 259.129 | 0.31 | <b>15 dataset matches;</b> 5 human, 2 mouse, ~1 plant (tomato)                                                                      | <i>Streptomyces clavuligerus, Streptomyces albus</i>                                                                                                                                             | American and UK gut                                                                                                                                    | <a href="https://gnps.ucsd.edu/Proteomics/status.jsp?task=e4dd2264edc145dd9fd0525d9e8fbc4a">https://gnps.ucsd.edu/Proteomics/status.jsp?task=e4dd2264edc145dd9fd0525d9e8fbc4a</a> | Present |
| Phe-Pro<br>(Phenylalanylproline) | 263.139 | 2.57 | <b>196 dataset matches;</b> 62 human, 29 mouse, 5 rat, 18 environment (including built environment), 8 food                         | <i>Staphylococcus aureus, Bacteroides, Akkermansia, Bifidobacterium, Roseburia, Bifidobacterium, E. coli, Pseudomonas, Bacillus, Burkholderia, Amycolaptosis, Leptospira, Eggerthella lenta,</i> | Human gut bacteria biotransformation, American gut (with plant consumption comparison), Human-associated                                               | <a href="https://gnps.ucsd.edu/Proteomics/status.jsp?task=ae38f3f9e8864fb59edb943a8e514bae">https://gnps.ucsd.edu/Proteomics/status.jsp?task=ae38f3f9e8864fb59edb943a8e514bae</a> | Present |

|                                    |         |      |                                                                                                                                                                                                      |                                                                                                                                                  |                                                                                                                                                                                                      |                                                                                                                                                                                   |         |
|------------------------------------|---------|------|------------------------------------------------------------------------------------------------------------------------------------------------------------------------------------------------------|--------------------------------------------------------------------------------------------------------------------------------------------------|------------------------------------------------------------------------------------------------------------------------------------------------------------------------------------------------------|-----------------------------------------------------------------------------------------------------------------------------------------------------------------------------------|---------|
|                                    |         |      | metagenome, ~4 plant (cotton, sugarcane, tomato, corn)                                                                                                                                               | <i>Actinomycete, Paenibacillus, Streptomyces, Acinetobacter pittii, Pantoea conspicua, Klebsiella, Enterobacter, Rothia, Veillonella atypica</i> | bacteria cultured with bile acids, Burger ingredients, Human skin microbiome isolates, Human rheumatoid arthritis, Zoo mammal fecal samples, Nobel twin study, Amazon skin and environmental samples |                                                                                                                                                                                   |         |
| Conjugated linoleic Acid (10E,12Z) | 263.237 | 7.52 | <b>132 dataset matches;</b> 43 human, 33 mouse, 6 rat, 10 environmental samples (including built environment), 14 food metagenome, ~6 plant (potato, corn, thale cress), ~5 animal (baboon, cheetah) | <i>Bacteroides, Akkermansia, Bifidobacterium, Roseburia, Eggerthella, Bacillus, Cutibacterium acnes</i>                                          | Human gut bacteria biotransformation, American gut (with plant consumption comparison), Urbanization gradient foods, ONR wright human study, ONR primary wright, ONR human diet, Nobel twin study    | <a href="https://gnps.ucsd.edu/Proteomics/status.jsp?task=83c13baa8dc74e64b18653edd89e8567">https://gnps.ucsd.edu/Proteomics/status.jsp?task=83c13baa8dc74e64b18653edd89e8567</a> | Absent  |
| Conjugated linoleic acid (9E,11E)  | 263.237 | 6.68 | <b>144 dataset matches;</b> 48 human, 36 mouse, 6 rat, 11 environment (including built                                                                                                               | <i>Bacteroides, Akkermansia, Bifidobacterium, Roseburia, Eggerthella, Methylobacter tundripaludum, Clostridium, Bacillus subtilis</i>            | ONR Primary Wright Human, Human Gut Bacteria Biotransformation, ONR human diet,                                                                                                                      | <a href="https://gnps.ucsd.edu/Proteomics/status.jsp?task=6389f1e6cf4f451">https://gnps.ucsd.edu/Proteomics/status.jsp?task=6389f1e6cf4f451</a>                                   | Present |

|                                 |         |      |                                                                                                                                |                                                                                       |                                                                                                                                                                                                                                    |                                                                                                                                                                                   |         |
|---------------------------------|---------|------|--------------------------------------------------------------------------------------------------------------------------------|---------------------------------------------------------------------------------------|------------------------------------------------------------------------------------------------------------------------------------------------------------------------------------------------------------------------------------|-----------------------------------------------------------------------------------------------------------------------------------------------------------------------------------|---------|
|                                 |         |      | environment), 12 food metagenome, ~4 animal (baboon, rhino, cheetah), ~7 plant (corn, potato, thale cress, oranges)            |                                                                                       | American Gut (with plant consumption comparison), Amerindians urbanization gradient, Amazon urbanization housing analysis, Nobel twin study, Urbanization gradient foods                                                           | <a href="#">893599372f2b682b5</a>                                                                                                                                                 |         |
| Thr-Phe (Threonylphenylalanine) | 267.134 | 0.48 | <b>44 dataset matches;</b> 9 human, 10 mouse, 5 rat, 3 environment, ~4 plant (tomato, thale cress, potato), 3 animal (cheetah) | <i>Bacteroides, Akkermansia, Bifidobacterium, Staphylococcus aureus, Streptomyces</i> | Human Gut Bacteria Biotransformation, Amerindians urbanization gradient, Human rheumatoid arthritis, Burger ingredients, ONR wright human study, Zoo mammal fecal samples, Anti-inflammatory diet in rheumatoid arthritis patients | <a href="https://gnps.ucsd.edu/Proteomics/status.jsp?task=34e92fc0e92349189ec8234819dac5d8">https://gnps.ucsd.edu/Proteomics/status.jsp?task=34e92fc0e92349189ec8234819dac5d8</a> | Present |

|                             |         |      |                                                                                                                                                                                                                   |                                                    |                                                                                                                                                                   |                                                                                                                                                                                   |         |
|-----------------------------|---------|------|-------------------------------------------------------------------------------------------------------------------------------------------------------------------------------------------------------------------|----------------------------------------------------|-------------------------------------------------------------------------------------------------------------------------------------------------------------------|-----------------------------------------------------------------------------------------------------------------------------------------------------------------------------------|---------|
| Pro-Arg<br>(Prolylarginine) | 272.171 | 0.32 | <b>7 dataset matches;</b> 4 human, 3 mouse                                                                                                                                                                        | NA                                                 | NA                                                                                                                                                                | <a href="https://gnps.ucsd.edu/Proteomics/status.jsp?task=4dd48325058045aa862fbb31c1a8230d">https://gnps.ucsd.edu/Proteomics/status.jsp?task=4dd48325058045aa862fbb31c1a8230d</a> | Present |
| 9-OxoOTrE                   | 275.201 | 4.42 | <b>58 dataset matches;</b> 16 human, 8 mouse, 4 rat, 3 environment, 1 food metagenome, ~13 plant (corn, cotton, tomato, <i>Malpighiaceae</i> plants, melon, thale cress, potato, orange), ~1 other animal (rhino) | <i>Bacillus, Pseudomonas, Streptomyces scabiei</i> | Burger ingredients, ONR primary wright human study, Human rheumatoid arthritis, Zoo mammal fecal samples, Anti-inflammatory diet in rheumatoid arthritis patients | <a href="https://gnps.ucsd.edu/Proteomics/status.jsp?task=9c0b6ad5c2f24f02b49c5d834598b39d">https://gnps.ucsd.edu/Proteomics/status.jsp?task=9c0b6ad5c2f24f02b49c5d834598b39d</a> | Present |

|                                           |                |             |                                                                                                                                                                                                                             |                                                                                                                                                                                                                                                     |                                                                                                                                                                                                                                                                                                                                                         |                                                                                                                                                                                          |                |
|-------------------------------------------|----------------|-------------|-----------------------------------------------------------------------------------------------------------------------------------------------------------------------------------------------------------------------------|-----------------------------------------------------------------------------------------------------------------------------------------------------------------------------------------------------------------------------------------------------|---------------------------------------------------------------------------------------------------------------------------------------------------------------------------------------------------------------------------------------------------------------------------------------------------------------------------------------------------------|------------------------------------------------------------------------------------------------------------------------------------------------------------------------------------------|----------------|
| <p>Phe-Leu<br/>(Phenylalanylleucine )</p> | <p>279.171</p> | <p>2.59</p> | <p><b>222 dataset matches;</b> 77 human, 37 mouse, 7 rat, 28 environment, 11 food metagenome, ~6 other animal (cheetah, rhino, cat), ~10 plant (cotton, <i>Malpighiaceae</i> plants, potato, tomato, thale cress, corn)</p> | <p><i>Bacteroides, Akkermansia, Bifidobacterium, E. coli, Paenibacillus, Eggerthella lenta, Staphylococcus aureus, Pseudomonas, Nocardia, Streptomyces, Veillonella atypica, Achromobacter xylosoxidans, Cutibacterium acnes, Amycolaptosis</i></p> | <p>Human gut bacteria biotransformation, American gut (with plant comparison and UK gut), Human-associated bacteria cultured with bile acids, Human skin microbiome isolates, Burger ingredients, Urbanization gradient foods, Amerindians urbanization gradient, Amazon urbanization housing analysis, Zoo mammal fecal samples, Ancient DNA teeth</p> | <p><a href="https://gnps.ucsd.edu/Proteomics/status.jsp?task=0506cb53c28b4aefa42281c3da9c0881">https://gnps.ucsd.edu/Proteomics/status.jsp?task=0506cb53c28b4aefa42281c3da9c0881</a></p> | <p>Present</p> |
|-------------------------------------------|----------------|-------------|-----------------------------------------------------------------------------------------------------------------------------------------------------------------------------------------------------------------------------|-----------------------------------------------------------------------------------------------------------------------------------------------------------------------------------------------------------------------------------------------------|---------------------------------------------------------------------------------------------------------------------------------------------------------------------------------------------------------------------------------------------------------------------------------------------------------------------------------------------------------|------------------------------------------------------------------------------------------------------------------------------------------------------------------------------------------|----------------|



|                                          |                |             |                                                                                                                                                                                                                                 |                                                                                                                                                                                                                                                                                                                  |                                                                                                                                                                                                                                                                                                                                             |                                                                                                                                                                                              |                |
|------------------------------------------|----------------|-------------|---------------------------------------------------------------------------------------------------------------------------------------------------------------------------------------------------------------------------------|------------------------------------------------------------------------------------------------------------------------------------------------------------------------------------------------------------------------------------------------------------------------------------------------------------------|---------------------------------------------------------------------------------------------------------------------------------------------------------------------------------------------------------------------------------------------------------------------------------------------------------------------------------------------|----------------------------------------------------------------------------------------------------------------------------------------------------------------------------------------------|----------------|
| <p>Leu-Phe<br/>(Leucylphenylalanine)</p> | <p>279.171</p> | <p>3.47</p> | <p><b>147 dataset matches;</b> 41 human, 26 mouse, 5 rat, 21 environment, 5 food metagenome, ~3 other animal (baboon, cheetah), ~9 plant (peppers, <i>Nicotiana benthamiana</i>, corn, potato, tomato, thale cress, cotton)</p> | <p><i>Staphylococcus aureus</i>,<br/><i>Eggerthella lenta</i>,<br/><i>Akkermansia</i>, <i>Bacteroides</i>,<br/><i>Bifidobacterium</i>, <i>Roseburia</i>,<br/><i>Clostridium</i>, <i>Bacillus</i>,<br/><i>Pseudomonas</i>,<br/><i>Amycolaptosis</i>, <i>E. coli</i>,<br/><i>Nocardia</i>, <i>Streptomyces</i></p> | <p>Human gut bacteria<br/>biotransformation,<br/>ONR primary wright, Human-associated bacteria cultured with bile acids, Burger ingredients,<br/>Human rheumatoid arthritis,<br/>Amerindians urbanization gradient,<br/>American gut (with plant consumption comparison), Zoo mammal fecal samples, Ancient DNA teeth, Nobel twin study</p> | <p><a href="https://gnps.ucsd.edu/ProteoSAs/Fe/status.jsp?task=7781fd3196b142e0975dbafc0f737392">https://gnps.ucsd.edu/ProteoSAs/Fe/status.jsp?task=7781fd3196b142e0975dbafc0f737392</a></p> | <p>Present</p> |
|------------------------------------------|----------------|-------------|---------------------------------------------------------------------------------------------------------------------------------------------------------------------------------------------------------------------------------|------------------------------------------------------------------------------------------------------------------------------------------------------------------------------------------------------------------------------------------------------------------------------------------------------------------|---------------------------------------------------------------------------------------------------------------------------------------------------------------------------------------------------------------------------------------------------------------------------------------------------------------------------------------------|----------------------------------------------------------------------------------------------------------------------------------------------------------------------------------------------|----------------|

|                               |         |      |                                                                     |            |                                                                                                                                            |                                                                                                                                                                                 |         |
|-------------------------------|---------|------|---------------------------------------------------------------------|------------|--------------------------------------------------------------------------------------------------------------------------------------------|---------------------------------------------------------------------------------------------------------------------------------------------------------------------------------|---------|
| N-Tetracosenoyl-4-sphingenine | 282.279 | 6.09 | <b>29 dataset matches;</b> 7 human, 11 mouse, 4 rat, 2 environment, | "Bacteria" | Burger ingredients, Human rheumatoid arthritis, Amerindians urbanization gradient, Anti-inflammatory diet in rheumatoid arthritis patients | <a href="https://gnps.ucsd.edu/ProteoSAs/status.jsp?task=ca9486b15bc64efea62c56a21ff74057">https://gnps.ucsd.edu/ProteoSAs/status.jsp?task=ca9486b15bc64efea62c56a21ff74057</a> | Present |
| Octadecanamide                | 284.295 | 8.55 | <b>5 dataset matches;</b> 3 human, 2 mouse                          | NA         | ONR human plasma                                                                                                                           | <a href="https://gnps.ucsd.edu/ProteoSAs/status.jsp?task=e11d31d2e9294d8ea30cf1712be3184a">https://gnps.ucsd.edu/ProteoSAs/status.jsp?task=e11d31d2e9294d8ea30cf1712be3184a</a> | Present |

|                                |         |      |                                                                                                                                                  |                                                                                                                                                                                  |                                                                                    |                                                                                                                                                                                   |         |
|--------------------------------|---------|------|--------------------------------------------------------------------------------------------------------------------------------------------------|----------------------------------------------------------------------------------------------------------------------------------------------------------------------------------|------------------------------------------------------------------------------------|-----------------------------------------------------------------------------------------------------------------------------------------------------------------------------------|---------|
| Xanthosine                     | 285.083 | 0.40 | <b>41 dataset matches;</b> 5 human, 21 mouse, 3 rat, 1 environment, 3 food metagenome, ~1 plant ( <i>Genipapo</i> ), ~1 other animal (rhino)     | <i>Streptomyces, Pseudomonas fluorescens, Photobacterium galathea, Paenibacillus peoriae, Xenorhabdus hominickii</i>                                                             | Burger ingredients, Zoo mammal fecal samples, Nobel twin study                     | <a href="https://gnps.ucsd.edu/Proteomics/status.jsp?task=f40c0769edcc4b89b9e2f5507e2a976a">https://gnps.ucsd.edu/Proteomics/status.jsp?task=f40c0769edcc4b89b9e2f5507e2a976a</a> | Present |
| Arg-Ile<br>(Arginylisoleucine) | 288.203 | 0.36 | <b>53 dataset matches;</b> 9 human, 9 mouse, 5 rat, 5 environment, 6 food metagenome, ~3 plant (cotton, potato, tomato), ~1 other animal (rhino) | <i>Bacteroides, Akkermansia, Bifidobacterium, Roseburia, Clostridium, Paenibacillus, Amycolaptosis, Pseudomonas fluorescens, Photobacterium galathea, Xenorhabdus hominickii</i> | Human gut bacteria biotransformation, Burger ingredients, Zoo mammal fecal samples | <a href="https://gnps.ucsd.edu/Proteomics/status.jsp?task=ac1635b5525e4c48a6ba690f9bd314b1">https://gnps.ucsd.edu/Proteomics/status.jsp?task=ac1635b5525e4c48a6ba690f9bd314b1</a> | Absent  |

|                              |         |      |                                                                                                                                         |                                                                                         |                                                                    |                                                                                                                                                                                       |         |
|------------------------------|---------|------|-----------------------------------------------------------------------------------------------------------------------------------------|-----------------------------------------------------------------------------------------|--------------------------------------------------------------------|---------------------------------------------------------------------------------------------------------------------------------------------------------------------------------------|---------|
| cis-11,14-Eicosadienoic acid | 291.268 | 5.54 | <b>21 dataset matches;</b> 7 human, 2 mouse, 1 rat, 2 environment, 1 food metagenome, ~2 plant (Malpighiaceae plants, Myoporeae plants) | NA                                                                                      | American Gut (with plant consumption comparison), Nobel twin study | <a href="https://gnps.ucsd.edu/ProteomeSAFe/status.jsp?task=c7075cb219be444493020b722375a145">https://gnps.ucsd.edu/ProteomeSAFe/status.jsp?task=c7075cb219be444493020b722375a145</a> | Absent  |
| N-Acetylmuramic Acid         | 294.119 | 0.38 | <b>17 dataset matches;</b> 1 human, 6 mouse, 1 rat, 2 environment, 1 plant (tomato)                                                     | <i>Streptomyces scabiei</i> ,<br><i>Streptomyces</i> , <i>Streptomyces clavuligerus</i> | NA                                                                 | <a href="https://gnps.ucsd.edu/ProteomeSAFe/status.jsp?task=6c495d96e0bb4ceeb8c8821fd7a8f57b">https://gnps.ucsd.edu/ProteomeSAFe/status.jsp?task=6c495d96e0bb4ceeb8c8821fd7a8f57b</a> | Present |

|                                     |                |             |                                                                                                                                                                                      |                                                                                                                                                                                                                                     |                                                                                                                                                                                                                                                                                                                                     |                                                                                                                                                                                              |                |
|-------------------------------------|----------------|-------------|--------------------------------------------------------------------------------------------------------------------------------------------------------------------------------------|-------------------------------------------------------------------------------------------------------------------------------------------------------------------------------------------------------------------------------------|-------------------------------------------------------------------------------------------------------------------------------------------------------------------------------------------------------------------------------------------------------------------------------------------------------------------------------------|----------------------------------------------------------------------------------------------------------------------------------------------------------------------------------------------|----------------|
| <p>Tyr-Leu<br/>(Tyrosylleucine)</p> | <p>295.165</p> | <p>2.71</p> | <p><b>153 dataset matches;</b> 48 human, 18 mouse, 6 rat, 16 environment, 12 food metagenome, ~3 other animal (cheetah, dog, rhino), ~6 plant (thale cress, melon, potato, corn)</p> | <p><i>E. coli, Bacteroides, Akkermansia, Bifidobacterium, Roseburia, Eggerthella, Clostridium, Pseudomonas, Nocardia, Streptomyces, Bacillus, Amycolaptosis, Paenibacillus, Photobacterium galathea, Xenorhabdus hominickii</i></p> | <p>Human Gut bacteria<br/>biotransformation, ONR human diet, Human skin microbiome isolates, Burger ingredients, Human-associated bacteria cultured with bile acids, ONR primary wright, Amerindians urbanization gradient, Zoo mammal fecal samples, Nobel twin study, Anti-inflammatory diet in rheumatoid arthritis patients</p> | <p><a href="https://gnps.ucsd.edu/ProteoSAs/Fe/status.jsp?task=b55595173aa54b429e8056f941be4d3a">https://gnps.ucsd.edu/ProteoSAs/Fe/status.jsp?task=b55595173aa54b429e8056f941be4d3a</a></p> | <p>Present</p> |
|-------------------------------------|----------------|-------------|--------------------------------------------------------------------------------------------------------------------------------------------------------------------------------------|-------------------------------------------------------------------------------------------------------------------------------------------------------------------------------------------------------------------------------------|-------------------------------------------------------------------------------------------------------------------------------------------------------------------------------------------------------------------------------------------------------------------------------------------------------------------------------------|----------------------------------------------------------------------------------------------------------------------------------------------------------------------------------------------|----------------|

|                                                    |                |             |                                                                                                                                                                      |                                                                                                                                                                                   |                                                                                                                                                                                                  |                                                                                                                                                                                          |                |
|----------------------------------------------------|----------------|-------------|----------------------------------------------------------------------------------------------------------------------------------------------------------------------|-----------------------------------------------------------------------------------------------------------------------------------------------------------------------------------|--------------------------------------------------------------------------------------------------------------------------------------------------------------------------------------------------|------------------------------------------------------------------------------------------------------------------------------------------------------------------------------------------|----------------|
| <p>Phe-Met<br/>(Phenylalanylmethionine)</p>        | <p>297.126</p> | <p>2.18</p> | <p><b>31 dataset matches;</b> 5 human, 7 mouse, 3 rat, 4 environment, 4 food metagenome, ~2 plant (tomato, corn)</p>                                                 | <p><i>Bacillus</i></p>                                                                                                                                                            | <p>ONR Wright human study, Amerindians urbanization gradient, Zoo mammal fecal samples</p>                                                                                                       | <p><a href="https://gnps.ucsd.edu/Proteomics/status.jsp?task=f691a68d2503426aa15f80cdd92f7d90">https://gnps.ucsd.edu/Proteomics/status.jsp?task=f691a68d2503426aa15f80cdd92f7d90</a></p> | <p>Absent</p>  |
| <p>Ile-Gly-Ile<br/>(Isoleucylglycylisoleucine)</p> | <p>302.205</p> | <p>3.04</p> | <p><b>99 dataset matches;</b> 16 human, 29 mouse, 5 rat, 14 environment, 7 food metagenome, ~3 other animal (cheetah, cat, dog), ~5 plant (corn, tomato, potato)</p> | <p><i>Eubacteria, Bacillus, Bacteroides, Akkermansia, Bifidobacterium, Roseburia, Eggerthella, Clostridium, Pseudomonas, Amycolaptosis, Streptomyces albus, Paenibacillus</i></p> | <p>Burger ingredients, Human gut bacteria biotransformation, Human-associated bacteria cultured with bile acids, ONR human diet, Amerindians urbanization gradient, Zoo mammal fecal samples</p> | <p><a href="https://gnps.ucsd.edu/Proteomics/status.jsp?task=0b17a25c3d6445d5b2c4a8e335adba23">https://gnps.ucsd.edu/Proteomics/status.jsp?task=0b17a25c3d6445d5b2c4a8e335adba23</a></p> | <p>Present</p> |

|                              |         |      |                                                                                                                                  |                                                                                                                                                                                                                                  |                                                                      |                                                                                                                                                                                   |         |
|------------------------------|---------|------|----------------------------------------------------------------------------------------------------------------------------------|----------------------------------------------------------------------------------------------------------------------------------------------------------------------------------------------------------------------------------|----------------------------------------------------------------------|-----------------------------------------------------------------------------------------------------------------------------------------------------------------------------------|---------|
| Val-Trp<br>(Valyltryptophan) | 304.167 | 3.02 | <b>28 dataset matches;</b> 2 human, 6 mouse, 2 rat, 2 food metagenome, ~3 plant (tomato, cotton, potato), 1 other animal (rhino) | <i>Streptomyces clavuligerus</i> ,<br><i>Streptomyces scabiei</i> ,<br><i>Bacteroides</i> , <i>Akkermansia</i> ,<br><i>Bifidobacterium</i> , <i>Roseburia</i> ,<br><i>Eggerthella</i> , <i>Clostridium</i>                       | Human gut bacteria<br>biotransformation,<br>Zoo mammal fecal samples | <a href="https://gnps.ucsd.edu/Proteomics/status.jsp?task=f2352760f6db441f9bb0880f3ee98c26">https://gnps.ucsd.edu/Proteomics/status.jsp?task=f2352760f6db441f9bb0880f3ee98c26</a> | Present |
| Fructoselysine               | 309.164 | 0.31 | <b>44 dataset matches;</b> 12 human, 13 mouse, 4 rat, 1 environment, 3 food metagenome                                           | <i>Pseudomonas</i> , <i>Nocardia</i> ,<br><i>Streptomyces</i> , <i>Bacteroides</i> ,<br><i>Akkermansia</i> ,<br><i>Bifidobacterium</i> , <i>Roseburia</i> ,<br><i>Eggerthella</i> , <i>Clostridium</i> ,<br><i>Amycolaptosis</i> | Human gut bacteria<br>biotransformation,<br>American gut (also UK)   | <a href="https://gnps.ucsd.edu/Proteomics/status.jsp?task=d3840c7b8fd0438ab2518ebba5bf5b62">https://gnps.ucsd.edu/Proteomics/status.jsp?task=d3840c7b8fd0438ab2518ebba5bf5b62</a> | Present |
| N-Palmitoylglycine           | 314.27  | 7.34 | <b>8 dataset matches;</b> 1 human, 2 mouse, ~1 plant ( <i>Euphorbiaceae</i> )                                                    | <i>Pseudomonas</i> , <i>Bacillus</i>                                                                                                                                                                                             | NA                                                                   | <a href="https://gnps.ucsd.edu/Proteomics/status.jsp?task=998632092bb7495692e01f7ba1be0248">https://gnps.ucsd.edu/Proteomics/status.jsp?task=998632092bb7495692e01f7ba1be0248</a> | Present |

|                                  |         |      |                                                                                                                                                                      |                                                                                                                                                                                                                                                   |                                                                                                                                                                            |                                                                                                                                                                                   |         |
|----------------------------------|---------|------|----------------------------------------------------------------------------------------------------------------------------------------------------------------------|---------------------------------------------------------------------------------------------------------------------------------------------------------------------------------------------------------------------------------------------------|----------------------------------------------------------------------------------------------------------------------------------------------------------------------------|-----------------------------------------------------------------------------------------------------------------------------------------------------------------------------------|---------|
| Ile-Trp<br>(Isoleucyltryptophan) | 318.167 | 2.27 | <b>59 dataset matches;</b> 7 human, 12 mouse, 4 rat, 5 environment, 2 food metagenome, ~5 plant (cotton, wild oat, corn, tomato, peppers), ~2 other animal (cheetah) | <i>Staphylococcus aureus</i> ,<br><i>Bacillus</i> , <i>Streptomyces</i> ,<br><i>Pseudomonas</i> ,<br><i>Amycolaptosis</i> , <i>Bacteroides</i> ,<br><i>Akkermansia</i> ,<br><i>Bifidobacterium</i> , <i>E. coli</i> ,<br><i>Eggerthella lenta</i> | Burger ingredients,<br>Human gut bacteria<br>biotransformation,<br>Human-associated bacteria cultured with bile acids,<br>ONR Wright human study, Zoo mammal fecal samples | <a href="https://gnps.ucsd.edu/Proteomics/status.jsp?task=cf87c54ff6f14611846d4b9bb63f3b3b">https://gnps.ucsd.edu/Proteomics/status.jsp?task=cf87c54ff6f14611846d4b9bb63f3b3b</a> | Absent  |
| Lithocholic acid                 | 323.273 | 6.84 | <b>17 dataset matches;</b> 8 human, 2 mouse, 3 rat, 1 environment, 1 plant (tomato)                                                                                  | NA                                                                                                                                                                                                                                                | American Gut (also UK), ONR Primary Wright, Human rheumatoid arthritis, Zoo mammal fecal samples                                                                           | <a href="https://gnps.ucsd.edu/Proteomics/status.jsp?task=2bd41fcad2ef45be8edc72db760066f3">https://gnps.ucsd.edu/Proteomics/status.jsp?task=2bd41fcad2ef45be8edc72db760066f3</a> | Present |



|                    |         |      |                                                                                                                                                  |                                                                                                                                                                                      |                                                                                                                                                         |                                                                                                                                                                                            |        |
|--------------------|---------|------|--------------------------------------------------------------------------------------------------------------------------------------------------|--------------------------------------------------------------------------------------------------------------------------------------------------------------------------------------|---------------------------------------------------------------------------------------------------------------------------------------------------------|--------------------------------------------------------------------------------------------------------------------------------------------------------------------------------------------|--------|
| Leucine enkephalin | 336.192 | 3.22 | <p><b>51 dataset matches;</b> 8 human, 10 mouse, 2 rat, 3 environment, 5 food metagenome, ~4 plant (corn, tomato), ~2 other animal (cheetah)</p> | <p><i>Bacteroides, Akkermansia, Bifidobacterium, Eggerthella lenta, Roseburia, lactobacillus, Eubacterium, Bacillus, Streptomyces, Pseudomonas, Amycolaptosis, Paenibacillus</i></p> | <p>Human gut bacteria<br/>biotransformation,<br/>Burger ingredients, ONR human diet,<br/>Human skin microbiome isolates, IBD severity human samples</p> | <p><a href="https://gnps.ucsd.edu/ProteoSAs/Fe/status.jsp?task=e0bbeff3ae04f2191b9bedf2ba39a22">https://gnps.ucsd.edu/ProteoSAs/Fe/status.jsp?task=e0bbeff3ae04f2191b9bedf2ba39a22</a></p> | Absent |
|--------------------|---------|------|--------------------------------------------------------------------------------------------------------------------------------------------------|--------------------------------------------------------------------------------------------------------------------------------------------------------------------------------------|---------------------------------------------------------------------------------------------------------------------------------------------------------|--------------------------------------------------------------------------------------------------------------------------------------------------------------------------------------------|--------|

|                                   |         |      |                                                                                                                                                                                                                                                                                                                                                                                        |                                                                                                                                                                                                                                                                                                                                                                                                                                                                                                                                                      |                                                                                                                                                                                                                                                                                                                              |                                                                                                                                                                                                    |         |
|-----------------------------------|---------|------|----------------------------------------------------------------------------------------------------------------------------------------------------------------------------------------------------------------------------------------------------------------------------------------------------------------------------------------------------------------------------------------|------------------------------------------------------------------------------------------------------------------------------------------------------------------------------------------------------------------------------------------------------------------------------------------------------------------------------------------------------------------------------------------------------------------------------------------------------------------------------------------------------------------------------------------------------|------------------------------------------------------------------------------------------------------------------------------------------------------------------------------------------------------------------------------------------------------------------------------------------------------------------------------|----------------------------------------------------------------------------------------------------------------------------------------------------------------------------------------------------|---------|
| 13-Docosenamide, (Z)- (Erucamide) | 338.342 | 9.19 | <p><b>228 dataset matches;</b> 52 human, 31 mouse, 6 rat, 24 environment, 5 food metagenome, ~10 other animal (baboon, cheetah, rhino, sheep), ~16 plant (<i>Mitragyna speciosa</i>, <i>Myoporeae</i> plants, <i>Angelica keiskei</i>, <i>Malpighiaceae</i> plants, <i>Thapsia garganica</i>, oranges, melon, tomato, wild oat, thale cress, <i>Psychotria insularum</i>, seaweed)</p> | <p><i>Bacteroides</i>, <i>Akkermansia</i>, <i>Bifidobacterium</i>, <i>Roseburia</i>, <i>Eggerthella</i>, <i>Clostridium</i>, <i>Methylobacter tundripaludum</i>, <i>E. coli</i>, <i>Pseudomonas</i>, <i>Bacillus</i>, <i>Cyanobacteria</i>, <i>Colwellia chukchiensis</i>, <i>Maribacter ulvicola</i>, <i>Algoriphagus machipongonensis</i>, <i>Zobellia uliginosa</i>, <i>Saccharomonospora viridis</i>, <i>Burkholderia</i>, <i>Streptomyces</i>, <i>Moorena bouillonii</i>, <i>Glutamicibacter arilaitensis</i>, <i>Staphylococcus aureus</i></p> | <p>Human gut bacteria<br/>biotransformation, Burger ingredients, ONR primary wright, Human-associated bacteria cultured with bile acids, Human skin microbiome isolates, ONR human fecal, American Gut (with plant consumption comparison), Amerindians urbanization gradient, ONR primary bile acids, Ancient DNA teeth</p> | <p><a href="https://gnps.ucsd.edu/Proteomics/SAFe/status.jsp?task=50b42b413dbd4aa98745d64374ae8f6d">https://gnps.ucsd.edu/Proteomics/SAFe/status.jsp?task=50b42b413dbd4aa98745d64374ae8f6d</a></p> | Present |
|-----------------------------------|---------|------|----------------------------------------------------------------------------------------------------------------------------------------------------------------------------------------------------------------------------------------------------------------------------------------------------------------------------------------------------------------------------------------|------------------------------------------------------------------------------------------------------------------------------------------------------------------------------------------------------------------------------------------------------------------------------------------------------------------------------------------------------------------------------------------------------------------------------------------------------------------------------------------------------------------------------------------------------|------------------------------------------------------------------------------------------------------------------------------------------------------------------------------------------------------------------------------------------------------------------------------------------------------------------------------|----------------------------------------------------------------------------------------------------------------------------------------------------------------------------------------------------|---------|

|                                       |         |      |                                                                                                                           |                                                            |                                                                                                                                     |                                                                                                                                                                                   |         |
|---------------------------------------|---------|------|---------------------------------------------------------------------------------------------------------------------------|------------------------------------------------------------|-------------------------------------------------------------------------------------------------------------------------------------|-----------------------------------------------------------------------------------------------------------------------------------------------------------------------------------|---------|
| Phe-Trp<br>(Phenylalanyltryptophan)   | 352.166 | 3.28 | <b>43 dataset matches;</b> 19 human, 11 mouse, 1 rat, 1 environment, ~2 other animal (baboon, cheetah), ~2 plant (tomato) | <i>Bacillus subtilis</i> ,<br><i>Paenibacillus</i>         | ONR Wright Human study, Burger ingredients, ONR primary wright, Zoo mammal fecal samples, Analysis of Alzheimer's, Nobel twin study | <a href="https://gnps.ucsd.edu/Proteomics/status.jsp?task=ab7256224a5240c38e829d2455ec4738">https://gnps.ucsd.edu/Proteomics/status.jsp?task=ab7256224a5240c38e829d2455ec4738</a> | Absent  |
| Ile-Val-Lys<br>(Isoleucylvalyllysine) | 359.266 | 0.60 | <b>13 dataset matches;</b> 1 human, 5 mouse, 3 rat,                                                                       | <i>Pseudomonas, bacillus</i> ,<br><i>Bacillus subtilis</i> | NA                                                                                                                                  | <a href="https://gnps.ucsd.edu/Proteomics/status.jsp?task=f1259278f31d49e7965135dc4fd92f5f">https://gnps.ucsd.edu/Proteomics/status.jsp?task=f1259278f31d49e7965135dc4fd92f5f</a> | Present |

|             |         |       |                                                                                                                                                                                                    |                                                                                                                               |                                                                                                                                                                                                                                                                                            |                                                                                                                                                                                              |         |
|-------------|---------|-------|----------------------------------------------------------------------------------------------------------------------------------------------------------------------------------------------------|-------------------------------------------------------------------------------------------------------------------------------|--------------------------------------------------------------------------------------------------------------------------------------------------------------------------------------------------------------------------------------------------------------------------------------------|----------------------------------------------------------------------------------------------------------------------------------------------------------------------------------------------|---------|
| Cholesterol | 369.352 | 10.50 | <p><b>204 dataset matches;</b> 102 human, 49 mouse, 6 rat, 5 environment, 17 food metagenome, ~5 plant (seaweed, tomato, sugarcane, thale cress, tomato), ~7 other animal (baboon, dog, sheep)</p> | <p><i>Bacteroides, Bifidobacterium, Akkermansia, Cutibacterium acnes, Streptomyces coelicolor, Pseudomonas aeruginosa</i></p> | <p>Amerindians urbanization gradient, Nobel twin study, American Gut (with plant consumption comparison and UK), Human gut bacteria biotransformation, urbanization gradient foods, ONR Wright human study, ONR human diet, ONR human fecal, Molecular analysis of human brain tissues</p> | <p><a href="https://gnps.ucsd.edu/ProteoSAs/Fe/status.jsp?task=4d622370a5fa4ad5bb1eab577469d246">https://gnps.ucsd.edu/ProteoSAs/Fe/status.jsp?task=4d622370a5fa4ad5bb1eab577469d246</a></p> | Present |
|-------------|---------|-------|----------------------------------------------------------------------------------------------------------------------------------------------------------------------------------------------------|-------------------------------------------------------------------------------------------------------------------------------|--------------------------------------------------------------------------------------------------------------------------------------------------------------------------------------------------------------------------------------------------------------------------------------------|----------------------------------------------------------------------------------------------------------------------------------------------------------------------------------------------|---------|

|                                                                                                                                                    |                |             |                                                                                                                          |                                                                                                                |                                                                                                                                                                                     |                                                                                                                                                                                              |                |
|----------------------------------------------------------------------------------------------------------------------------------------------------|----------------|-------------|--------------------------------------------------------------------------------------------------------------------------|----------------------------------------------------------------------------------------------------------------|-------------------------------------------------------------------------------------------------------------------------------------------------------------------------------------|----------------------------------------------------------------------------------------------------------------------------------------------------------------------------------------------|----------------|
| <p>(R)-4-<br/>((3R,5S,8R,9S,10S,13R,14S,17R)-3-hydroxy-10,13-dimethyl-7,12-dioxohexadecahydro-1H-cyclopenta[a]phenanthren-17-yl)pentanoic acid</p> | <p>405.264</p> | <p>4.81</p> | <p><b>51 dataset matches;</b> 22 human, 12 mouse, 1 rat, 1 environment, 5 food metagenome, ~3 other animal (cheetah)</p> | <p><i>Streptomyces, Pseudonocardia, Gordonia, Kitasatospora</i></p>                                            | <p>Human-associated bacteria cultured with bile acids, IBD severity, American Gut (with plant consumption comparison), Zoo mammal fecal samples, Nobel twin study, IBD severity</p> | <p><a href="https://gnps.ucsd.edu/ProteomeSAFe/status.jsp?task=8cfb07ca20de46af9157341b39d25de5">https://gnps.ucsd.edu/ProteomeSAFe/status.jsp?task=8cfb07ca20de46af9157341b39d25de5</a></p> | <p>Present</p> |
| <p>Glycoursodeoxycholic acid</p>                                                                                                                   | <p>414.301</p> | <p>5.01</p> | <p><b>47 dataset matches;</b> 26 human, 2 mouse, 5 rat, 3 environment, ~2 other animal (baboon), ~1 plant (tomato)</p>   | <p><i>Bacteroides, Akkermansia, Bifidobacterium, Alteromonas, Pseudomonas fragi, E. coli, Streptomyces</i></p> | <p>Human rheumatoid arthritis, ONR primary wright, Human gut bacteria biotransformation, Nobel twin study, Amerindians urbanization gradient, Analysis of Alzheimer's</p>           | <p><a href="https://gnps.ucsd.edu/ProteomeSAFe/status.jsp?task=43e8d71f3ad84cc0b7a7967e821a45a9">https://gnps.ucsd.edu/ProteomeSAFe/status.jsp?task=43e8d71f3ad84cc0b7a7967e821a45a9</a></p> | <p>Present</p> |

|                                                                                                                                    |         |      |                                                                                                                                                                                            |                                                                                                                                                                                                                                                                                                                |                                                                                                                                                                                               |                                                                                                                                                                                          |         |
|------------------------------------------------------------------------------------------------------------------------------------|---------|------|--------------------------------------------------------------------------------------------------------------------------------------------------------------------------------------------|----------------------------------------------------------------------------------------------------------------------------------------------------------------------------------------------------------------------------------------------------------------------------------------------------------------|-----------------------------------------------------------------------------------------------------------------------------------------------------------------------------------------------|------------------------------------------------------------------------------------------------------------------------------------------------------------------------------------------|---------|
| Cholic acid                                                                                                                        | 426.318 | 5.19 | <p><b>187 dataset matches;</b> 51 human, 54 mouse, 10 rat, 15 environment, 13 food metageneome, ~2 plant (Ardisia crenata, thale cress), ~6 other animal (baboon, dog, cheetah, sheep)</p> | <p><i>Bacteroides, Akkermansia, Bifidobacterium, Roseburia, Eggerthella, Clostridium, Pseudomonas, Stenotrophomonas, Achromobacter, Salinispora, Photobacterium galathea, Paenibacillus peoriae, Xenorhabdus hominickii, Streptomyces, Salinispora, Nocardiosis, Brevibacterium, Bacillus, Alteromonas</i></p> | <p>ONR Wright Human study, ONR Primary Wright, Burger ingredients, Human gut bacteria biotransformation, American Gut (also UK), Zoo mammal fecal samples, Nobel twin study, IBD severity</p> | <p><a href="https://gnps.ucsd.edu/Proteomics/status.jsp?task=496f2c33aaed4da0a9096623376f7afe">https://gnps.ucsd.edu/Proteomics/status.jsp?task=496f2c33aaed4da0a9096623376f7afe</a></p> | Present |
| 6R)-2-(hydroxymethyl)-6-((3R,5R,7R,8R,9S,10S,12S,13R,14S,17R)-3,7,12-trihydroxy-10,13-dimethylhexadecahydro-1H-cyclopenta[a]phenan | 431.318 | 5.25 | <p><b>6 dataset matches;</b> 1 human, 2 mouse, 2 rat, 1 other animal (cheetah)</p>                                                                                                         | NA                                                                                                                                                                                                                                                                                                             | <p>Amerindians Urbanization gradient</p>                                                                                                                                                      | <p><a href="https://gnps.ucsd.edu/Proteomics/status.jsp?task=9d7b3242ba97467f88cc7e2849a73c9a">https://gnps.ucsd.edu/Proteomics/status.jsp?task=9d7b3242ba97467f88cc7e2849a73c9a</a></p> | Absent  |

|                            |         |      |                                                                                                                                                                                                                                    |                                                                                                                                                                         |                                                                                                                                          |                                                                                                                                                                                              |         |
|----------------------------|---------|------|------------------------------------------------------------------------------------------------------------------------------------------------------------------------------------------------------------------------------------|-------------------------------------------------------------------------------------------------------------------------------------------------------------------------|------------------------------------------------------------------------------------------------------------------------------------------|----------------------------------------------------------------------------------------------------------------------------------------------------------------------------------------------|---------|
| thren-17-yl)heptanoic acid |         |      |                                                                                                                                                                                                                                    |                                                                                                                                                                         |                                                                                                                                          |                                                                                                                                                                                              |         |
| Oleanolic acid             | 439.359 | 7.62 | <p><b>106 dataset matches;</b> 22 human, 11 mouse, 3 rat, 5 environment, 16 food metagenome, ~5 other animal (cheetah, ant), ~11 plant (rosemary, <i>Fraxinus excelsior</i>, oranges, corn, tomato, <i>Parietaria judaica</i>)</p> | <p><i>Streptomyces, Burkholderia, Bacillus, Eggerthella lenta, Cyanonacteria, Staphylococcus, Acinetobacter pittii, Pantoea conspicua, Klebsiella, Enterobacter</i></p> | <p>ONR Wright Human study, American Gut, Amazon urbanization housing analysis, Urbanization gradient foods, Zoo mammal fecal samples</p> | <p><a href="https://gnps.ucsd.edu/ProteomeSAFe/status.jsp?task=800acf7db452461c9d0a890f990ecd83">https://gnps.ucsd.edu/ProteomeSAFe/status.jsp?task=800acf7db452461c9d0a890f990ecd83</a></p> | Present |

|                  |        |      |                                                                                                                                                                                            |                                                                                                                                                                                                                                                                                                                                                            |                                                                                                                                                                                                                                                                                                                                                                                              |                                                                                                                                                                                              |        |
|------------------|--------|------|--------------------------------------------------------------------------------------------------------------------------------------------------------------------------------------------|------------------------------------------------------------------------------------------------------------------------------------------------------------------------------------------------------------------------------------------------------------------------------------------------------------------------------------------------------------|----------------------------------------------------------------------------------------------------------------------------------------------------------------------------------------------------------------------------------------------------------------------------------------------------------------------------------------------------------------------------------------------|----------------------------------------------------------------------------------------------------------------------------------------------------------------------------------------------|--------|
| Glycocholic acid | 446.32 | 4.69 | <p><b>204 dataset matches;</b> 85 human, 19 mouse, 2 rat, 2 environment, 18 food metagenome, ~9 plant (corn, tomato, <i>Ardisia crenata</i>), ~7 other animal (rhino, baboon, cheetah)</p> | <p><i>Cyanobacteria, Pseudomonas, Streptomyces, E. coli, Alteromonas, Bacillus subtilis, Pseudonocardia, Gordonia, Kitasatospora, Actinomadura, Nocardia, Actinomycetes, Pseudoalteromonas, Roseovarius, Staphylococcus aureus, Bacteroides, Akkermansia, Bifidobacterium, Roseburia, Eggerthella, Clostridium, Paenibacillus, Cutibacterium acnes</i></p> | <p>Human-associated bacteria cultured with bile acids, ONR Wright human study, IBD human samples, Burger ingredients, Human rheumatoid arthritis, Human gut bacteria biotransformation, Amerindians urbanization gradient, Urbanization gradient foods, ONR human plasma, ONR primary bile acids, Nobel twin study, <i>Salinispora</i>, American Gut (with plant consumption comparison)</p> | <p><a href="https://gnps.ucsd.edu/ProteoSAs/Fe/status.jsp?task=8d5d343a95964faba3108020318837ff">https://gnps.ucsd.edu/ProteoSAs/Fe/status.jsp?task=8d5d343a95964faba3108020318837ff</a></p> | Absent |
|------------------|--------|------|--------------------------------------------------------------------------------------------------------------------------------------------------------------------------------------------|------------------------------------------------------------------------------------------------------------------------------------------------------------------------------------------------------------------------------------------------------------------------------------------------------------------------------------------------------------|----------------------------------------------------------------------------------------------------------------------------------------------------------------------------------------------------------------------------------------------------------------------------------------------------------------------------------------------------------------------------------------------|----------------------------------------------------------------------------------------------------------------------------------------------------------------------------------------------|--------|



|           |         |      |                                                                                                                                                                 |                                                      |                                                                                                                                                                                                                                    |                                                                                                                                                                                   |         |
|-----------|---------|------|-----------------------------------------------------------------------------------------------------------------------------------------------------------------|------------------------------------------------------|------------------------------------------------------------------------------------------------------------------------------------------------------------------------------------------------------------------------------------|-----------------------------------------------------------------------------------------------------------------------------------------------------------------------------------|---------|
| Enoxolone | 471.347 | 6.92 | <b>32 dataset matches;</b> 12 human, 2 mouse, 2 environment, 4 food metagenome, ~2 other animal (cheetah), ~3 plant (melon)                                     | <i>Bacillus subtilis, E. coli</i>                    | American Gut (also UK), Ancient DNA teeth                                                                                                                                                                                          | <a href="https://gnps.ucsd.edu/Proteomics/status.jsp?task=bdc20710970b4c47a99c178a1c2606e9">https://gnps.ucsd.edu/Proteomics/status.jsp?task=bdc20710970b4c47a99c178a1c2606e9</a> | Absent  |
| Bilirubin | 585.272 | 8.90 | <b>123 dataset matches;</b> 65 human, 33 mouse, 7 rat, 1 environment, 1 food metagenome, ~5 other animal (cheetah, baboon, dog), ~2 plant (tomato, thale cress) | <i>Streptomyces albus, Kitasatospora cystarginea</i> | ONR human plasma, IBD human fecal samples, ONR Primary Wright, Human rheumatoid arthritis, American gut (with plant consumption comparison), Amerindians urbanization gradient, Amazon urbanization housing analysis, IBD severity | <a href="https://gnps.ucsd.edu/Proteomics/status.jsp?task=2405d7eb22f64cceba64d6b43bd2f0aa">https://gnps.ucsd.edu/Proteomics/status.jsp?task=2405d7eb22f64cceba64d6b43bd2f0aa</a> | Present |
| Urobilin  | 591.318 | 4.07 | <b>116 dataset matches;</b> 62 human, 34 mouse, 6 rat, 6 environment, ~4 other animal                                                                           | NA                                                   | ONR Primary Wright, ONR Human Study, IBD severity, Human rheumatoid                                                                                                                                                                | <a href="https://gnps.ucsd.edu/Proteomics/status.jsp?task=da0037fa7f4c4f7">https://gnps.ucsd.edu/Proteomics/status.jsp?task=da0037fa7f4c4f7</a>                                   | Present |

|             |         |      |                                                                                                                                                       |    |                                                                                                                                                                                                                                                                                                           |                                                                                                                                                                                     |         |
|-------------|---------|------|-------------------------------------------------------------------------------------------------------------------------------------------------------|----|-----------------------------------------------------------------------------------------------------------------------------------------------------------------------------------------------------------------------------------------------------------------------------------------------------------|-------------------------------------------------------------------------------------------------------------------------------------------------------------------------------------|---------|
|             |         |      | (cheetah, cats, rhino), ~1 plant (tomato)                                                                                                             |    | arthritis, American Gut (with plant consumption comparison), Zoo mammal fecal samples, IBD severity, Nobel twin study                                                                                                                                                                                     | <a href="#">2860d39a4d7184402</a>                                                                                                                                                   |         |
| Stercobilin | 595.349 | 4.05 | <b>94 dataset matches;</b> 57 human, 16 mouse, 6 rat, 6 environment, 2 food metagenome, ~4 other animal (rhino), ~2 plant ( <i>Genipapo</i> , tomato) | NA | ONR human fecal, ONR Primary Wright, IBD severity, American gut (also UK), Amazon urbanization housing analysis, Amazon urbanization skin and environmental samples, Zoo mammal fecal samples, Nobel twin study, Anti-inflammatory diet of rheumatoid arthritis patients, Analysis of Alzheimer's disease | <a href="https://gnps.ucsd.edu/ProteoSAs/Fe/status.jsp?task=e314b28d4ff343ccbef124eb09fb016">https://gnps.ucsd.edu/ProteoSAs/Fe/status.jsp?task=e314b28d4ff343ccbef124eb09fb016</a> | Present |
