# Supplementary material for: Untargeted Fecal Metabolomic Analyses across an Industrialization Gradient Reveal Shared Metabolites and Impact of Industrialization on Fecal Microbiome-Metabolome Interactions
Source: PubMed Central journal article supplement (PMC9765122; doi:10.1128/msystems.00710-22), 2022-11-23
Supplement: msystems.00710-22-s0008.pdf [file msystems.00710-22-s0008.pdf]

**MZmine v 2.33**

| Method                                                   | Parameter                             | Value                   |
|----------------------------------------------------------|---------------------------------------|-------------------------|
| <b>Mass Detection</b>                                    | MS1                                   | 1.80E+05                |
|                                                          | MS2                                   | 1.00E+03                |
| <b>Chromatogram Builder</b>                              | Min time span (min)                   | 0.01                    |
|                                                          | Min height                            | 5.40E+05                |
|                                                          | <i>m/z</i> tolerance (ppm)            | 1.00E+01                |
|                                                          | Filter                                | MS1                     |
| <b>Chromatogram Deconvolution - Local Minimum Search</b> | Chromatographic Threshold             | 5%                      |
|                                                          | Search minimum in RT range            | 0.10 min                |
|                                                          | Min relative height                   | 15%                     |
|                                                          | Min absolute height                   | 3.00E+05                |
|                                                          | Min ratio of peak top/edge            | 2                       |
|                                                          | Peak duration range                   | 0.01-1.5min             |
|                                                          | <i>m/z</i> range for MS2 scan pairing | 0.01                    |
|                                                          | RT range for MS2 scan pairing         | 0.1min                  |
| <b>Isotopic Peaks Grouper</b>                            | <i>m/z</i> tolerance (ppm)            | 1.00E-02                |
|                                                          | Retention time tolerance (min)        | 0.05                    |
|                                                          | Max charge                            | 3                       |
|                                                          | Representative isotope                | Lowest <i>m/z</i>       |
|                                                          | Monotonic shape                       | Yes                     |
| <b>Join Aligner</b>                                      | <i>m/z</i> tolerance (ppm)            | 10                      |
|                                                          | Weight for <i>m/z</i>                 | 5                       |
|                                                          | Weight for RT                         | 1                       |
|                                                          | Retention time tolerance (min)        | 0.5                     |
| <b>Peaks List Row Filter</b>                             | Retention time (min)                  | 0.2-12.51               |
|                                                          | Min peaks per row                     | empty (leave unchecked) |
|                                                          | Keep only peaks with MS2 scan (GNPS)  | yes                     |
| <b>Gap Filling Peak Finder*</b>                          | Intensity tolerance (%)               | 75                      |
|                                                          | <i>m/z</i> tolerance (ppm)            | 1.00E+01                |
|                                                          | <i>m/z</i> tolerance ( <i>m/z</i> )   | 1.00E-06                |
|                                                          | Retention time tolerance (min)        | 0.3                     |
|                                                          | RT correction                         | yes                     |
